# Supplementary material
Source: publisher figshare collection journal article supplement (https://acs.figshare.com/ndownloader/files/5847069)
Supplement: Supplementary file 1 [file 5847069]

 
data_masa799
 
_audit_creation_method            SHELXL-2013
_chemical_name_systematic
;
 ?
;
_chemical_name_common             ?
_chemical_melting_point           ?
_chemical_formula_moiety          'C33 H45 Cl Hf Si2 Sn, C7 H8'
_chemical_formula_sum
 'C40 H53 Cl Hf Si2 Sn' 
_chemical_formula_weight          922.65

loop_
 _atom_type_symbol
 _atom_type_description
 _atom_type_scat_dispersion_real
 _atom_type_scat_dispersion_imag
 _atom_type_scat_source
 'C'  'C'   0.0033   0.0016
 'International Tables Vol C Tables 4.2.6.8 and 6.1.1.4'
 'H'  'H'   0.0000   0.0000
 'International Tables Vol C Tables 4.2.6.8 and 6.1.1.4'
 'O'  'O'   0.0106   0.0060
 'International Tables Vol C Tables 4.2.6.8 and 6.1.1.4'
 'Si'  'Si'   0.0817   0.0704
 'International Tables Vol C Tables 4.2.6.8 and 6.1.1.4'
 'Cl'  'Cl'   0.1484   0.1585
 'International Tables Vol C Tables 4.2.6.8 and 6.1.1.4'
 'Sn'  'Sn'  -0.6537   1.4246
 'International Tables Vol C Tables 4.2.6.8 and 6.1.1.4'
 'Hf'  'Hf'  -0.5830   6.1852
 'International Tables Vol C Tables 4.2.6.8 and 6.1.1.4'
 
_space_group_crystal_system       orthorhombic
_space_group_IT_number            62
_space_group_name_H-M_alt         'P n m a'
_space_group_name_Hall            '-P 2ac 2n'
 
_shelx_space_group_comment
;
The symmetry employed for this shelxl refinement is uniquely defined
by the following loop, which should always be used as a source of
symmetry information in preference to the above space-group names.
They are only intended as comments.
;
 
loop_
 _space_group_symop_operation_xyz
 'x, y, z'
 '-x+1/2, -y, z+1/2'
 '-x, y+1/2, -z'
 'x+1/2, -y+1/2, -z+1/2'
 '-x, -y, -z'
 'x-1/2, y, -z-1/2'
 'x, -y-1/2, z'
 '-x-1/2, y-1/2, z-1/2'
 
_cell_length_a                    31.894(2)
_cell_length_b                    15.3940(10)
_cell_length_c                    7.9405(5)
_cell_angle_alpha                 90
_cell_angle_beta                  90
_cell_angle_gamma                 90
_cell_volume                      3898.6(4)
_cell_formula_units_Z             4
_cell_measurement_temperature     100(2)
_cell_measurement_reflns_used    4677
_cell_measurement_theta_min        2.55
_cell_measurement_theta_max       26.78
 
_exptl_crystal_description        block 
_exptl_crystal_colour             orange 
_exptl_crystal_density_meas       ? 
_exptl_crystal_density_method     ?              
_exptl_crystal_density_diffrn     1.572          
_exptl_crystal_F_000              1840
_exptl_transmission_factor_min    ?                                             
_exptl_transmission_factor_max    ?                                             
_exptl_crystal_size_max           0.08 
_exptl_crystal_size_mid           0.04 
_exptl_crystal_size_min           0.03 
_exptl_absorpt_coefficient_mu     3.474
_shelx_estimated_absorpt_T_min    ? 
_shelx_estimated_absorpt_T_max    ? 
_exptl_absorpt_correction_type    empirical 
_exptl_absorpt_correction_T_min   0.846 
_exptl_absorpt_correction_T_max   0.901 
_exptl_absorpt_process_details    'SADABS; Sheldrick 1996' 
 
_exptl_special_details
;
 ?
;
 
_diffrn_ambient_temperature      100(2)
_diffrn_radiation_wavelength      0.71073
_diffrn_radiation_type            MoK\a
_diffrn_radiation_source          'fine-focus sealed tube' 
_diffrn_radiation_monochromator   graphite 
_diffrn_measurement_device_type   'CCD area detector' 
_diffrn_measurement_method        'phi and omega scans'
_diffrn_reflns_number             27224
_diffrn_reflns_av_unetI/netI      0.0463
_diffrn_reflns_av_R_equivalents   0.0644
_diffrn_reflns_limit_h_min        -41
_diffrn_reflns_limit_h_max        25
_diffrn_reflns_limit_k_min        -19
_diffrn_reflns_limit_k_max        20
_diffrn_reflns_limit_l_min        -9
_diffrn_reflns_limit_l_max        10
_diffrn_reflns_theta_min          1.839
_diffrn_reflns_theta_max          27.894
_diffrn_reflns_theta_full         25.242
_diffrn_measured_fraction_theta_max   0.999
_diffrn_measured_fraction_theta_full  1.000
_diffrn_reflns_Laue_measured_fraction_max    0.999
_diffrn_reflns_Laue_measured_fraction_full   1.000
_diffrn_reflns_point_group_measured_fraction_max   0.999
_diffrn_reflns_point_group_measured_fraction_full  1.000
_reflns_number_total              4829
_reflns_number_gt                 4160
_reflns_threshold_expression      'I > 2\s(I)'
_reflns_Friedel_coverage          0.000
_reflns_Friedel_fraction_max      .
_reflns_Friedel_fraction_full     .
 
_reflns_special_details
;
 Reflections were merged by SHELXL according to the crystal
 class for the calculation of statistics and refinement.
 
 _reflns_Friedel_fraction is defined as the number of unique
 Friedel pairs measured divided by the number that would be
 possible theoretically, ignoring centric projections and
 systematic absences.
;
 
_computing_data_collection        'Bruker SMART' 
_computing_cell_refinement        'Bruker SMART'  
_computing_data_reduction         'Bruker SMART'  
_computing_structure_solution     'SHELXS-97 (Sheldrick, 1990)' 
_computing_structure_refinement   'SHELXL-2013 (Sheldrick, 2013)'
_computing_molecular_graphics     'Bruker SHELXTL' 
_computing_publication_material   'Bruker SHELXTL' 
 
_refine_special_details
;
 ?
;
_refine_ls_structure_factor_coef  Fsqd
_refine_ls_matrix_type            full
_refine_ls_weighting_scheme       calc
_refine_ls_weighting_details
'w=1/[\s^2^(Fo^2^)+(0.0368P)^2^+0.3915P] where P=(Fo^2^+2Fc^2^)/3'
_atom_sites_solution_primary      direct 
_atom_sites_solution_secondary    difmap 
_atom_sites_solution_hydrogens    geom
_refine_ls_hydrogen_treatment     constr
_refine_ls_extinction_method      none
_refine_ls_extinction_coef        .
_refine_ls_number_reflns          4829
_refine_ls_number_parameters      214
_refine_ls_number_restraints      0
_refine_ls_R_factor_all           0.0483
_refine_ls_R_factor_gt            0.0387
_refine_ls_wR_factor_ref          0.0811
_refine_ls_wR_factor_gt           0.0779
_refine_ls_goodness_of_fit_ref    1.099
_refine_ls_restrained_S_all       1.099
_refine_ls_shift/su_max           0.002
_refine_ls_shift/su_mean          0.000
 
loop_
 _atom_site_label
 _atom_site_type_symbol
 _atom_site_fract_x
 _atom_site_fract_y
 _atom_site_fract_z
 _atom_site_U_iso_or_equiv
 _atom_site_adp_type
 _atom_site_occupancy
 _atom_site_site_symmetry_order  
 _atom_site_calc_flag
 _atom_site_refinement_flags_posn
 _atom_site_refinement_flags_adp
 _atom_site_refinement_flags_occupancy
 _atom_site_disorder_assembly
 _atom_site_disorder_group
Sn1 Sn 0.37180(2) 0.2500 0.00114(5) 0.01461(10) Uani 1 2 d S T P . .
C1 C 0.39674(11) 0.1544(3) 0.2022(5) 0.0134(8) Uani 1 1 d . . . . .
C2 C 0.36366(11) 0.2029(2) 0.2942(5) 0.0120(8) Uani 1 1 d . . . . .
Si1 Si 0.39465(3) 0.03734(7) 0.13895(14) 0.0143(2) Uani 1 1 d . . . . .
C3 C 0.33976(12) -0.0054(3) 0.1203(6) 0.0228(9) Uani 1 1 d . . . . .
H1 H 0.3406 -0.0654 0.0877 0.034 Uiso 1 1 calc R U . . .
H2 H 0.3248 0.0274 0.0368 0.034 Uiso 1 1 calc R U . . .
H3 H 0.3258 -0.0001 0.2269 0.034 Uiso 1 1 calc R U . . .
C4 C 0.41788(13) 0.0284(3) -0.0773(5) 0.0237(9) Uani 1 1 d . . . . .
H4 H 0.4172 -0.0311 -0.1132 0.036 Uiso 1 1 calc R U . . .
H5 H 0.4464 0.0486 -0.0750 0.036 Uiso 1 1 calc R U . . .
H6 H 0.4019 0.0633 -0.1543 0.036 Uiso 1 1 calc R U . . .
C5 C 0.42367(13) -0.0394(3) 0.2872(6) 0.0199(9) Uani 1 1 d . . . . .
C6 C 0.47142(13) -0.0289(3) 0.2776(6) 0.0282(10) Uani 1 1 d . . . . .
H7 H 0.4806 -0.0379 0.1638 0.042 Uiso 1 1 calc R U . . .
H8 H 0.4846 -0.0708 0.3499 0.042 Uiso 1 1 calc R U . . .
H9 H 0.4790 0.0286 0.3133 0.042 Uiso 1 1 calc R U . . .
C7 C 0.41337(16) -0.1337(3) 0.2387(7) 0.0343(12) Uani 1 1 d . . . . .
H10 H 0.4215 -0.1438 0.1239 0.051 Uiso 1 1 calc R U . . .
H11 H 0.3838 -0.1435 0.2507 0.051 Uiso 1 1 calc R U . . .
H12 H 0.4284 -0.1727 0.3111 0.051 Uiso 1 1 calc R U . . .
C8 C 0.41032(15) -0.0252(3) 0.4688(6) 0.0313(11) Uani 1 1 d . . . . .
H13 H 0.3804 -0.0313 0.4777 0.047 Uiso 1 1 calc R U . . .
H14 H 0.4183 0.0321 0.5039 0.047 Uiso 1 1 calc R U . . .
H15 H 0.4237 -0.0674 0.5396 0.047 Uiso 1 1 calc R U . . .
C9 C 0.33039(11) 0.1586(2) 0.3966(5) 0.0136(8) Uani 1 1 d . . . . .
C10 C 0.33940(12) 0.1301(3) 0.5582(5) 0.0178(8) Uani 1 1 d . . . . .
H16 H 0.3658 0.1401 0.6036 0.021 Uiso 1 1 calc R U . . .
C11 C 0.30928(12) 0.0867(3) 0.6533(6) 0.0223(9) Uani 1 1 d . . . . .
H17 H 0.3157 0.0679 0.7615 0.027 Uiso 1 1 calc R U . . .
C12 C 0.26981(13) 0.0715(3) 0.5874(6) 0.0243(10) Uani 1 1 d . . . . .
H18 H 0.2498 0.0415 0.6498 0.029 Uiso 1 1 calc R U . . .
C13 C 0.26046(12) 0.1013(3) 0.4283(6) 0.0228(9) Uani 1 1 d . . . . .
H19 H 0.2337 0.0928 0.3849 0.027 Uiso 1 1 calc R U . . .
C14 C 0.29035(12) 0.1439(3) 0.3315(5) 0.0205(9) Uani 1 1 d . . . . .
H20 H 0.2837 0.1626 0.2234 0.025 Uiso 1 1 calc R U . . .
Hf1 Hf 0.44078(2) 0.2500 0.28731(3) 0.01221(7) Uani 1 2 d S T P . .
Cl1 Cl 0.44213(4) 0.2500 0.59418(19) 0.0248(3) Uani 1 2 d S T P . .
C15 C 0.48663(18) 0.2500 0.0299(8) 0.0267(15) Uani 1 2 d S T P . .
H21 H 0.4740 0.2500 -0.0757 0.032 Uiso 1 2 calc R U P . .
C16 C 0.49804(12) 0.1764(3) 0.1257(6) 0.0252(10) Uani 1 1 d . . . . .
H22 H 0.4946 0.1188 0.0930 0.030 Uiso 1 1 calc R U . . .
C17 C 0.51525(12) 0.2045(3) 0.2772(6) 0.0272(10) Uani 1 1 d . . . . .
H23 H 0.5251 0.1691 0.3635 0.033 Uiso 1 1 calc R U . . .
C18 C 0.1395(3) 0.2500 0.3029(12) 0.064(3) Uani 1 2 d S T P . .
H24 H 0.1325 0.1912 0.3315 0.096 Uiso 0.5 1 calc R U P . .
H25 H 0.1147 0.2804 0.2681 0.096 Uiso 0.5 1 calc R U P . .
H26 H 0.1514 0.2784 0.3993 0.096 Uiso 0.5 1 calc R U P . .
C19 C 0.1712(2) 0.2500 0.1599(10) 0.0380(18) Uani 1 2 d S T P . .
C20 C 0.18665(16) 0.1728(3) 0.0937(7) 0.0390(13) Uani 1 1 d . . . . .
H27 H 0.1770 0.1201 0.1362 0.047 Uiso 1 1 calc R U . . .
C21 C 0.21617(17) 0.1729(4) -0.0348(7) 0.0436(14) Uani 1 1 d . . . . .
H28 H 0.2263 0.1205 -0.0763 0.052 Uiso 1 1 calc R U . . .
C22 C 0.2306(2) 0.2500 -0.1012(10) 0.0415(19) Uani 1 2 d S T P . .
H29 H 0.2497 0.2500 -0.1895 0.050 Uiso 1 2 calc R U P . .
 
loop_
 _atom_site_aniso_label
 _atom_site_aniso_U_11
 _atom_site_aniso_U_22
 _atom_site_aniso_U_33
 _atom_site_aniso_U_23
 _atom_site_aniso_U_13
 _atom_site_aniso_U_12
Sn1 0.0149(2) 0.0169(2) 0.01204(19) 0.000 -0.00173(14) 0.000
C1 0.0131(19) 0.0166(19) 0.0106(19) 0.0021(16) 0.0010(14) 0.0024(15)
C2 0.0099(18) 0.016(2) 0.0105(19) 0.0016(15) -0.0014(14) 0.0007(14)
Si1 0.0139(5) 0.0136(5) 0.0155(6) -0.0021(4) -0.0004(4) -0.0005(4)
C3 0.019(2) 0.021(2) 0.029(3) -0.0026(19) -0.0044(18) -0.0028(17)
C4 0.027(2) 0.025(2) 0.019(2) -0.0043(19) 0.0005(18) 0.0023(18)
C5 0.021(2) 0.015(2) 0.024(2) -0.0024(18) 0.0002(17) 0.0022(16)
C6 0.024(2) 0.029(2) 0.032(3) -0.005(2) -0.0081(19) 0.0061(19)
C7 0.036(3) 0.016(2) 0.050(3) -0.003(2) -0.006(2) 0.0022(19)
C8 0.037(3) 0.035(3) 0.021(3) 0.010(2) 0.0044(19) 0.015(2)
C9 0.0112(18) 0.0153(19) 0.014(2) -0.0011(16) 0.0017(14) 0.0005(15)
C10 0.014(2) 0.021(2) 0.018(2) 0.0031(17) 0.0006(16) -0.0019(16)
C11 0.021(2) 0.030(2) 0.016(2) 0.0087(19) -0.0009(16) -0.0035(18)
C12 0.022(2) 0.024(2) 0.026(3) -0.0003(19) 0.0077(18) -0.0082(18)
C13 0.013(2) 0.029(2) 0.026(2) -0.002(2) -0.0001(17) -0.0062(17)
C14 0.016(2) 0.031(2) 0.015(2) 0.0006(18) 0.0000(15) -0.0008(17)
Hf1 0.00974(12) 0.01329(12) 0.01361(12) 0.000 -0.00204(9) 0.000
Cl1 0.0231(7) 0.0333(8) 0.0179(7) 0.000 -0.0034(6) 0.000
C15 0.011(3) 0.050(4) 0.019(3) 0.000 0.005(2) 0.000
C16 0.016(2) 0.024(2) 0.036(3) -0.007(2) 0.0085(18) 0.0006(17)
C17 0.011(2) 0.037(3) 0.033(3) 0.003(2) -0.0052(18) 0.0048(18)
C18 0.053(6) 0.082(7) 0.056(7) 0.000 0.016(5) 0.000
C19 0.028(4) 0.051(5) 0.035(4) 0.000 -0.016(3) 0.000
C20 0.046(3) 0.034(3) 0.037(3) 0.000(2) -0.017(2) -0.011(2)
C21 0.048(3) 0.038(3) 0.045(4) -0.012(3) -0.019(3) 0.005(3)
C22 0.036(4) 0.050(5) 0.038(5) 0.000 -0.006(3) 0.000
 
_geom_special_details
;
 All esds (except the esd in the dihedral angle between two l.s. planes)
 are estimated using the full covariance matrix.  The cell esds are taken
 into account individually in the estimation of esds in distances, angles
 and torsion angles; correlations between esds in cell parameters are only
 used when they are defined by crystal symmetry.  An approximate (isotropic)
 treatment of cell esds is used for estimating esds involving l.s. planes.
;
 
loop_
 _geom_bond_atom_site_label_1
 _geom_bond_atom_site_label_2
 _geom_bond_distance
 _geom_bond_site_symmetry_2
 _geom_bond_publ_flag
Sn1 C1 2.313(4) 7_565 ?
Sn1 C1 2.313(4) . ?
Sn1 C2 2.451(4) 7_565 ?
Sn1 C2 2.451(4) . ?
Sn1 Hf1 3.1627(5) . ?
C1 C2 1.485(5) . ?
C1 Si1 1.871(4) . ?
C1 Hf1 2.144(4) . ?
C2 C2 1.450(7) 7_565 ?
C2 C9 1.501(5) . ?
C2 Hf1 2.565(4) . ?
Si1 C4 1.875(4) . ?
Si1 C3 1.876(4) . ?
Si1 C5 1.908(4) . ?
C3 H1 0.9600 . ?
C3 H2 0.9600 . ?
C3 H3 0.9600 . ?
C4 H4 0.9600 . ?
C4 H5 0.9600 . ?
C4 H6 0.9600 . ?
C5 C8 1.519(6) . ?
C5 C6 1.534(6) . ?
C5 C7 1.537(6) . ?
C6 H7 0.9600 . ?
C6 H8 0.9600 . ?
C6 H9 0.9600 . ?
C7 H10 0.9600 . ?
C7 H11 0.9600 . ?
C7 H12 0.9600 . ?
C8 H13 0.9600 . ?
C8 H14 0.9600 . ?
C8 H15 0.9600 . ?
C9 C10 1.386(5) . ?
C9 C14 1.396(5) . ?
C10 C11 1.393(5) . ?
C10 H16 0.9300 . ?
C11 C12 1.383(6) . ?
C11 H17 0.9300 . ?
C12 C13 1.377(6) . ?
C12 H18 0.9300 . ?
C13 C14 1.389(6) . ?
C13 H19 0.9300 . ?
C14 H20 0.9300 . ?
Hf1 C1 2.144(4) 7_565 ?
Hf1 Cl1 2.4371(15) . ?
Hf1 C17 2.478(4) 7_565 ?
Hf1 C17 2.478(4) . ?
Hf1 C16 2.504(4) . ?
Hf1 C16 2.504(4) 7_565 ?
Hf1 C15 2.513(6) . ?
Hf1 C2 2.565(4) 7_565 ?
C15 C16 1.412(6) . ?
C15 C16 1.413(6) 7_565 ?
C15 H21 0.9300 . ?
C16 C17 1.391(7) . ?
C16 H22 0.9300 . ?
C17 C17 1.401(9) 7_565 ?
C17 H23 0.9300 . ?
C18 C19 1.520(11) . ?
C18 H24 0.9600 . ?
C18 H25 0.9600 . ?
C18 H26 0.9600 . ?
C19 C20 1.390(7) . ?
C19 C20 1.390(7) 7_565 ?
C20 C21 1.388(8) . ?
C20 H27 0.9300 . ?
C21 C22 1.378(7) . ?
C21 H28 0.9300 . ?
C22 C21 1.378(7) 7_565 ?
C22 H29 0.9300 . ?
 
loop_
 _geom_angle_atom_site_label_1
 _geom_angle_atom_site_label_2
 _geom_angle_atom_site_label_3
 _geom_angle
 _geom_angle_site_symmetry_1
 _geom_angle_site_symmetry_3
 _geom_angle_publ_flag
C1 Sn1 C1 79.08(19) 7_565 . ?
C1 Sn1 C2 36.17(12) 7_565 7_565 ?
C1 Sn1 C2 64.49(13) . 7_565 ?
C1 Sn1 C2 64.49(13) 7_565 . ?
C1 Sn1 C2 36.18(12) . . ?
C2 Sn1 C2 34.41(17) 7_565 . ?
C1 Sn1 Hf1 42.68(10) 7_565 . ?
C1 Sn1 Hf1 42.68(10) . . ?
C2 Sn1 Hf1 52.53(8) 7_565 . ?
C2 Sn1 Hf1 52.53(8) . . ?
C2 C1 Si1 126.3(3) . . ?
C2 C1 Hf1 88.0(2) . . ?
Si1 C1 Hf1 140.3(2) . . ?
C2 C1 Sn1 77.0(2) . . ?
Si1 C1 Sn1 114.53(18) . . ?
Hf1 C1 Sn1 90.32(14) . . ?
C2 C2 C1 120.2(2) 7_565 . ?
C2 C2 C9 117.0(2) 7_565 . ?
C1 C2 C9 122.7(3) . . ?
C2 C2 Sn1 72.79(9) 7_565 . ?
C1 C2 Sn1 66.8(2) . . ?
C9 C2 Sn1 136.4(3) . . ?
C2 C2 Hf1 73.58(8) 7_565 . ?
C1 C2 Hf1 56.66(19) . . ?
C9 C2 Hf1 144.9(3) . . ?
Sn1 C2 Hf1 78.14(11) . . ?
C1 Si1 C4 107.58(19) . . ?
C1 Si1 C3 113.08(18) . . ?
C4 Si1 C3 105.7(2) . . ?
C1 Si1 C5 114.41(18) . . ?
C4 Si1 C5 109.16(19) . . ?
C3 Si1 C5 106.50(19) . . ?
Si1 C3 H1 109.5 . . ?
Si1 C3 H2 109.5 . . ?
H1 C3 H2 109.5 . . ?
Si1 C3 H3 109.5 . . ?
H1 C3 H3 109.5 . . ?
H2 C3 H3 109.5 . . ?
Si1 C4 H4 109.5 . . ?
Si1 C4 H5 109.5 . . ?
H4 C4 H5 109.5 . . ?
Si1 C4 H6 109.5 . . ?
H4 C4 H6 109.5 . . ?
H5 C4 H6 109.5 . . ?
C8 C5 C6 108.1(4) . . ?
C8 C5 C7 108.3(4) . . ?
C6 C5 C7 107.4(4) . . ?
C8 C5 Si1 111.1(3) . . ?
C6 C5 Si1 112.7(3) . . ?
C7 C5 Si1 109.0(3) . . ?
C5 C6 H7 109.5 . . ?
C5 C6 H8 109.5 . . ?
H7 C6 H8 109.5 . . ?
C5 C6 H9 109.5 . . ?
H7 C6 H9 109.5 . . ?
H8 C6 H9 109.5 . . ?
C5 C7 H10 109.5 . . ?
C5 C7 H11 109.5 . . ?
H10 C7 H11 109.5 . . ?
C5 C7 H12 109.5 . . ?
H10 C7 H12 109.5 . . ?
H11 C7 H12 109.5 . . ?
C5 C8 H13 109.5 . . ?
C5 C8 H14 109.5 . . ?
H13 C8 H14 109.5 . . ?
C5 C8 H15 109.5 . . ?
H13 C8 H15 109.5 . . ?
H14 C8 H15 109.5 . . ?
C10 C9 C14 118.8(4) . . ?
C10 C9 C2 119.9(3) . . ?
C14 C9 C2 121.3(4) . . ?
C9 C10 C11 120.7(4) . . ?
C9 C10 H16 119.7 . . ?
C11 C10 H16 119.7 . . ?
C12 C11 C10 120.2(4) . . ?
C12 C11 H17 119.9 . . ?
C10 C11 H17 119.9 . . ?
C13 C12 C11 119.2(4) . . ?
C13 C12 H18 120.4 . . ?
C11 C12 H18 120.4 . . ?
C12 C13 C14 121.1(4) . . ?
C12 C13 H19 119.5 . . ?
C14 C13 H19 119.5 . . ?
C13 C14 C9 120.0(4) . . ?
C13 C14 H20 120.0 . . ?
C9 C14 H20 120.0 . . ?
C1 Hf1 C1 86.7(2) . 7_565 ?
C1 Hf1 Cl1 109.07(10) . . ?
C1 Hf1 Cl1 109.07(10) 7_565 . ?
C1 Hf1 C17 144.28(15) . 7_565 ?
C1 Hf1 C17 115.07(15) 7_565 7_565 ?
Cl1 Hf1 C17 90.88(12) . 7_565 ?
C1 Hf1 C17 115.07(15) . . ?
C1 Hf1 C17 144.28(15) 7_565 . ?
Cl1 Hf1 C17 90.88(12) . . ?
C17 Hf1 C17 32.8(2) 7_565 . ?
C1 Hf1 C16 90.32(14) . . ?
C1 Hf1 C16 128.85(15) 7_565 . ?
Cl1 Hf1 C16 119.97(12) . . ?
C17 Hf1 C16 53.98(15) 7_565 . ?
C17 Hf1 C16 32.43(15) . . ?
C1 Hf1 C16 128.85(15) . 7_565 ?
C1 Hf1 C16 90.32(14) 7_565 7_565 ?
Cl1 Hf1 C16 119.97(12) . 7_565 ?
C17 Hf1 C16 32.43(15) 7_565 7_565 ?
C17 Hf1 C16 53.98(15) . 7_565 ?
C16 Hf1 C16 53.8(2) . 7_565 ?
C1 Hf1 C15 97.18(14) . . ?
C1 Hf1 C15 97.18(14) 7_565 . ?
Cl1 Hf1 C15 143.40(15) . . ?
C17 Hf1 C15 54.25(17) 7_565 . ?
C17 Hf1 C15 54.25(17) . . ?
C16 Hf1 C15 32.71(13) . . ?
C16 Hf1 C15 32.71(13) 7_565 . ?
C1 Hf1 C2 64.69(13) . 7_565 ?
C1 Hf1 C2 35.35(13) 7_565 7_565 ?
Cl1 Hf1 C2 89.76(9) . 7_565 ?
C17 Hf1 C2 147.16(14) 7_565 7_565 ?
C17 Hf1 C2 179.35(14) . 7_565 ?
C16 Hf1 C2 146.98(14) . 7_565 ?
C16 Hf1 C2 125.63(13) 7_565 7_565 ?
C15 Hf1 C2 125.12(16) . 7_565 ?
C1 Hf1 C2 35.35(13) . . ?
C1 Hf1 C2 64.69(13) 7_565 . ?
Cl1 Hf1 C2 89.76(9) . . ?
C17 Hf1 C2 179.35(14) 7_565 . ?
C17 Hf1 C2 147.16(14) . . ?
C16 Hf1 C2 125.63(13) . . ?
C16 Hf1 C2 146.98(14) 7_565 . ?
C15 Hf1 C2 125.12(16) . . ?
C2 Hf1 C2 32.84(16) 7_565 . ?
C1 Hf1 Sn1 47.00(10) . . ?
C1 Hf1 Sn1 47.00(10) 7_565 . ?
Cl1 Hf1 Sn1 136.95(4) . . ?
C17 Hf1 Sn1 130.05(11) 7_565 . ?
C17 Hf1 Sn1 130.05(11) . . ?
C16 Hf1 Sn1 98.00(11) . . ?
C16 Hf1 Sn1 98.00(11) 7_565 . ?
C15 Hf1 Sn1 79.66(14) . . ?
C2 Hf1 Sn1 49.32(8) 7_565 . ?
C2 Hf1 Sn1 49.32(8) . . ?
C16 C15 C16 106.7(6) . 7_565 ?
C16 C15 Hf1 73.3(3) . . ?
C16 C15 Hf1 73.3(3) 7_565 . ?
C16 C15 H21 126.6 . . ?
C16 C15 H21 126.6 7_565 . ?
Hf1 C15 H21 118.8 . . ?
C17 C16 C15 108.5(4) . . ?
C17 C16 Hf1 72.8(2) . . ?
C15 C16 Hf1 74.0(3) . . ?
C17 C16 H22 125.8 . . ?
C15 C16 H22 125.8 . . ?
Hf1 C16 H22 119.3 . . ?
C16 C17 C17 108.1(3) . 7_565 ?
C16 C17 Hf1 74.8(2) . . ?
C17 C17 Hf1 73.58(11) 7_565 . ?
C16 C17 H23 125.9 . . ?
C17 C17 H23 125.9 7_565 . ?
Hf1 C17 H23 117.7 . . ?
C19 C18 H24 109.5 . . ?
C19 C18 H25 109.5 . . ?
H24 C18 H25 109.5 . . ?
C19 C18 H26 109.5 . . ?
H24 C18 H26 109.5 . . ?
H25 C18 H26 109.5 . . ?
C20 C19 C20 117.6(7) . 7_565 ?
C20 C19 C18 121.2(4) . . ?
C20 C19 C18 121.2(4) 7_565 . ?
C19 C20 C21 121.1(6) . . ?
C19 C20 H27 119.4 . . ?
C21 C20 H27 119.4 . . ?
C22 C21 C20 120.6(6) . . ?
C22 C21 H28 119.7 . . ?
C20 C21 H28 119.7 . . ?
C21 C22 C21 118.9(8) . 7_565 ?
C21 C22 H29 120.5 . . ?
C21 C22 H29 120.5 7_565 . ?
 
_refine_diff_density_max    1.625
_refine_diff_density_min   -1.152
_refine_diff_density_rms    0.154

_shelxl_version_number 2013-4

_shelx_res_file
;
TITL masa799
REM  Yadorkari-X generated
CELL 0.71073 31.8942 15.3940 7.9405 90.0000 90.0000 90.0000
ZERR 4.0 0.0020 0.0010 0.0005 0.0000 0.0000 0.0000
LATT 1
SYMM 0.5-X, -Y, 0.5+Z
SYMM -X, 0.5+Y, -Z
SYMM 0.5+X, 0.5-Y, 0.5-Z
REM  SPGR Pnma orthorhombic
SFAC C H O Si Cl Sn Hf
UNIT 200 280 4 8 4 4 4
TEMP 0.0
L.S. 10
FMAP 2
PLAN -20
ACTA
BOND$H
OMIT   2   0   0

WGHT    0.036800    0.391500
FVAR       0.18369
SN1   6    0.371805    0.250000    0.001140    10.50000    0.01493    0.01685 =
         0.01204    0.00000   -0.00173    0.00000
C1    1    0.396736    0.154354    0.202225    11.00000    0.01309    0.01663 =
         0.01059    0.00209    0.00105    0.00240
C2    1    0.363656    0.202908    0.294167    11.00000    0.00985    0.01555 =
         0.01046    0.00156   -0.00140    0.00073
SI1   4    0.394650    0.037336    0.138950    11.00000    0.01387    0.01363 =
         0.01555   -0.00213   -0.00044   -0.00047
C3    1    0.339758   -0.005418    0.120339    11.00000    0.01856    0.02060 =
         0.02930   -0.00256   -0.00440   -0.00282
AFIX  33
H1    2    0.340583   -0.065442    0.087713    11.00000   -1.50000
H2    2    0.324811    0.027372    0.036846    11.00000   -1.50000
H3    2    0.325794   -0.000060    0.226935    11.00000   -1.50000
AFIX   0
C4    1    0.417884    0.028447   -0.077260    11.00000    0.02662    0.02528 =
         0.01915   -0.00428    0.00050    0.00230
AFIX  33
H4    2    0.417249   -0.031085   -0.113174    11.00000   -1.50000
H5    2    0.446371    0.048554   -0.074991    11.00000   -1.50000
H6    2    0.401929    0.063322   -0.154320    11.00000   -1.50000
AFIX   0
C5    1    0.423667   -0.039417    0.287222    11.00000    0.02098    0.01499 =
         0.02363   -0.00243    0.00025    0.00224
C6    1    0.471421   -0.028884    0.277646    11.00000    0.02362    0.02856 =
         0.03247   -0.00530   -0.00813    0.00610
AFIX  33
H7    2    0.480568   -0.037856    0.163786    11.00000   -1.50000
H8    2    0.484575   -0.070802    0.349902    11.00000   -1.50000
H9    2    0.479012    0.028599    0.313253    11.00000   -1.50000
AFIX   0
C7    1    0.413370   -0.133693    0.238659    11.00000    0.03636    0.01640 =
         0.05001   -0.00275   -0.00618    0.00216
AFIX  33
H10   2    0.421459   -0.143769    0.123858    11.00000   -1.50000
H11   2    0.383796   -0.143497    0.250713    11.00000   -1.50000
H12   2    0.428423   -0.172693    0.311077    11.00000   -1.50000
AFIX   0
C8    1    0.410315   -0.025183    0.468823    11.00000    0.03714    0.03542 =
         0.02135    0.01039    0.00437    0.01453
AFIX  33
H13   2    0.380442   -0.031312    0.477659    11.00000   -1.50000
H14   2    0.418328    0.032140    0.503905    11.00000   -1.50000
H15   2    0.423740   -0.067385    0.539642    11.00000   -1.50000
AFIX   0
C9    1    0.330387    0.158572    0.396593    11.00000    0.01116    0.01533 =
         0.01431   -0.00114    0.00171    0.00049
C10   1    0.339404    0.130096    0.558198    11.00000    0.01414    0.02112 =
         0.01800    0.00309    0.00057   -0.00189
AFIX  43
H16   2    0.365849    0.140070    0.603591    11.00000   -1.20000
AFIX   0
C11   1    0.309279    0.086709    0.653295    11.00000    0.02117    0.02956 =
         0.01605    0.00868   -0.00091   -0.00350
AFIX  43
H17   2    0.315723    0.067873    0.761525    11.00000   -1.20000
AFIX   0
C12   1    0.269812    0.071529    0.587382    11.00000    0.02246    0.02411 =
         0.02632   -0.00026    0.00768   -0.00825
AFIX  43
H18   2    0.249828    0.041543    0.649789    11.00000   -1.20000
AFIX   0
C13   1    0.260463    0.101342    0.428266    11.00000    0.01296    0.02912 =
         0.02623   -0.00247   -0.00014   -0.00625
AFIX  43
H19   2    0.233692    0.092832    0.384880    11.00000   -1.20000
AFIX   0
C14   1    0.290351    0.143907    0.331512    11.00000    0.01581    0.03099 =
         0.01480    0.00064    0.00005   -0.00081
AFIX  43
H20   2    0.283699    0.162633    0.223413    11.00000   -1.20000
AFIX   0
HF1   7    0.440776    0.250000    0.287309    10.50000    0.00974    0.01329 =
         0.01361    0.00000   -0.00204    0.00000
CL1   5    0.442134    0.250000    0.594183    10.50000    0.02308    0.03329 =
         0.01790    0.00000   -0.00338    0.00000
C15   1    0.486626    0.250000    0.029946    10.50000    0.01102    0.05017 =
         0.01901    0.00000    0.00543    0.00000
AFIX  43
H21   2    0.474028    0.250000   -0.075680    10.50000   -1.20000
AFIX   0
C16   1    0.498043    0.176374    0.125683    11.00000    0.01567    0.02428 =
         0.03580   -0.00656    0.00853    0.00062
AFIX  43
H22   2    0.494633    0.118797    0.092971    11.00000   -1.20000
AFIX   0
C17   1    0.515249    0.204508    0.277173    11.00000    0.01142    0.03690 =
         0.03339    0.00343   -0.00520    0.00483
AFIX  43
H23   2    0.525051    0.169057    0.363452    11.00000   -1.20000
AFIX   0
C18   1    0.139540    0.250000    0.302858    10.50000    0.05296    0.08219 =
         0.05603    0.00000    0.01650    0.00000
AFIX  33
H24   2    0.132457    0.191216    0.331487    10.50000   -1.50000
H25   2    0.114722    0.280381    0.268074    10.50000   -1.50000
H26   2    0.151429    0.278403    0.399316    10.50000   -1.50000
AFIX   0
C19   1    0.171223    0.250000    0.159894    10.50000    0.02824    0.05092 =
         0.03487    0.00000   -0.01610    0.00000
C20   1    0.186646    0.172783    0.093694    11.00000    0.04631    0.03380 =
         0.03685    0.00033   -0.01671   -0.01070
AFIX  43
H27   2    0.177027    0.120127    0.136163    11.00000   -1.20000
AFIX   0
C21   1    0.216168    0.172926   -0.034754    11.00000    0.04751    0.03845 =
         0.04490   -0.01153   -0.01933    0.00542
AFIX  43
H28   2    0.226306    0.120498   -0.076326    11.00000   -1.20000
AFIX   0
C22   1    0.230590    0.250000   -0.101237    10.50000    0.03629    0.04972 =
         0.03843    0.00000   -0.00610    0.00000
AFIX  43
H29   2    0.249747    0.250000   -0.189534    10.50000   -1.20000

AFIX   0
HKLF 4

REM  masa799
REM R1 =  0.0387 for    4160 Fo > 4sig(Fo)  and  0.0483 for all    4829 data
REM    214 parameters refined using      0 restraints

END

WGHT      0.0357      0.9193

REM Highest difference peak  1.625,  deepest hole -1.152,  1-sigma level  0.154
Q1    1   0.4329  0.2500  0.1864  10.50000  0.05    1.63
Q2    1   0.4414  0.2500  0.4031  10.50000  0.05    1.60
Q3    1   0.4483  0.2500  0.1883  10.50000  0.05    1.54
Q4    1   0.4627  0.2166  0.2730  11.00000  0.05    1.22
Q5    1   0.3770  0.2500 -0.1065  10.50000  0.05    1.20
Q6    1   0.3723  0.2500  0.1210  10.50000  0.05    0.93
Q7    1   0.3886  0.2109  0.0413  11.00000  0.05    0.82
Q8    1   0.3597  0.2116  0.0433  11.00000  0.05    0.82
Q9    1   0.4476  0.1881  0.5570  11.00000  0.05    0.78
Q10   1   0.1772  0.2500 -0.2205  10.50000  0.05    0.78
Q11   1   0.3592  0.2500  0.2607  10.50000  0.05    0.65
Q12   1   0.1589  0.2500  0.2162  10.50000  0.05    0.63
Q13   1   0.1887  0.2231  0.1857  11.00000  0.05    0.63
Q14   1   0.3712  0.2500  0.5007  10.50000  0.05    0.62
Q15   1   0.3640  0.2500  0.3456  10.50000  0.05    0.61
Q16   1   0.5185  0.2500  0.1743  10.50000  0.05    0.61
Q17   1   0.3519  0.2214 -0.0611  11.00000  0.05    0.61
Q18   1   0.4396  0.2097  0.7600  11.00000  0.05    0.59
Q19   1   0.3798  0.1794  0.2030  11.00000  0.05    0.58
Q20   1   0.2385  0.2500  0.4376  10.50000  0.05    0.58
;
_shelx_res_checksum   43066

_shelx_hkl_file
;
   0   0   1    2.09    2.84
   0   0   1    0.20    2.27
   0   0   2  452.29   22.97
   0   0   2  381.82   21.53
   0   0   3   -9.44    4.97
   0   0   4  655.19   37.08
   0   0   5   -0.73    6.47
   0   0   6   33.71   12.86
   0   0   7    6.06   10.18
   0   0   8   85.07   19.67
   0   0   9    6.08   12.44
   0   0  10  659.78   53.67
   0   1   0   -9.35    1.01
   0  -1   0   -8.58    1.14
   0   1   1 6000.46  236.90
   0  -1   1 5719.13  233.85
   0   1   1 6011.04  234.04
   0   1   2   -2.42    5.06
   0  -1   2    3.61    5.09
   0   1   2   -5.30    3.57
   0  -1   3 1784.57   82.96
   0   1   3 2030.94   84.01
   0   1   4    2.25    5.69
   0  -1   4   -0.91    6.31
   0  -1   5   20.26    9.35
   0   1   5   20.18    8.91
   0  -1   6   -2.14    7.49
   0   1   6   -1.97    7.88
   0   1   7   39.80   14.45
   0  -1   7   44.46   15.30
   0  -1   8    3.05   10.71
   0   1   8   13.13   12.40
   0  -1   9  114.62   23.92
   0   1   9   97.79   22.62
   0   1  10   -3.50   14.94
   0  -1  10   -4.76   13.73
   0   2   0 6228.13  247.30
   0  -2   1   -0.37    3.37
   0  -2  -1    0.91    2.14
   0   2   1    1.42    2.14
   0   2   1   -3.65    2.70
   0  -2   2  215.49   15.10
   0   2   2  198.60   14.78
   0   2   2  197.36   12.41
   0   2   3   -1.20    5.36
   0  -2   3    6.49    6.36
   0   2   3    6.27    4.60
   0   2   4 2913.47  127.17
   0  -2   4 2981.53  127.83
   0   2   5   -6.02    6.23
   0  -2   5    3.15    7.28
   0  -2   6   56.49   14.46
   0   2   6   79.70   15.94
   0   2   7    1.40   10.58
   0  -2   7   -4.52    8.94
   0   2   8   -8.13   10.75
   0  -2   8    2.81   11.65
   0  -2   9   -0.28   13.23
   0   2   9  -20.53   10.29
   0  -2  10  801.93   62.06
   0   2  10  956.29   65.93
   0   3   0   -4.59    4.49
   0  -3   1 5197.62  215.62
   0   3   1 5414.19  216.61
   0   3   1 5272.15  215.55
   0  -3  -1 5586.02  216.53
   0  -3   1 5414.97  209.05
   0   3   2   -2.04    3.13
   0   3   2    1.52    5.23
   0  -3   2    2.39    5.44
   0   3   3 2371.68  102.80
   0   3   3 2467.84  105.20
   0  -3   3 2507.78  105.99
   0   3   4    1.60    6.01
   0  -3   4    9.78    7.14
   0   3   5  565.19   35.73
   0  -3   5  536.34   35.70
   0  -3   6    2.76   10.15
   0   3   6   -3.17    7.35
   0   3   7   97.17   19.49
   0  -3   7   97.53   19.81
   0  -3   8    2.77   12.34
   0   3   8   15.46   12.59
   0   3   9   87.42   22.31
   0  -3   9  111.05   25.46
   0   3  10   -1.67   15.71
   0  -3  10   -2.32   15.67
   0   4   0 9993.11  396.90
   0  -4   1    2.72    3.66
   0  -4  -1    3.66    2.25
   0   4   1    5.18    5.79
   0  -4   1   -1.31    5.57
   0  -4   1   -2.74    5.58
   0   4   1   -1.07    1.99
   0   4   2  103.12    7.75
   0  -4   2  115.63   12.61
   0   4   2  111.90   12.07
   0   4   3    5.16    6.18
   0  -4   3   -2.50    5.25
   0   4   3   -0.93    3.41
   0   4   4 1802.14   82.02
   0  -4   4 1696.47   81.57
   0   4   5    1.19    7.38
   0  -4   5   -8.13    7.22
   0   4   6  191.09   23.75
   0  -4   6  209.67   25.24
   0   4   7    0.71    9.83
   0  -4   7   -9.27    9.93
   0   4   8  128.35   24.34
   0  -4   8  179.43   27.91
   0  -4   9   -1.84   15.31
   0   4   9    6.00   13.40
   0  -4  10  477.77   50.20
   0   4  10  525.92   50.88
   0   5   0   -5.21    6.38
   0  -5   1  554.53   25.93
   0  -5   1  541.11   30.57
   0   5   1  578.67   31.01
   0   5   1  557.46   24.05
   0  -5   1  535.65   29.63
   0   5   2   -5.13    5.16
   0   5   2    0.25    2.47
   0  -5   2    2.65    6.62
   0   5   3 1529.50   66.15
   0  -5   3 1577.42   72.62
   0   5   3 1553.13   72.87
   0  -5   4   10.30    7.40
   0   5   4   -9.66    5.56
   0   5   5   77.76   15.96
   0  -5   5   60.56   14.77
   0   5   6    8.30    9.62
   0  -5   6    0.86    9.76
   0   5   7   90.66   18.86
   0  -5   7   79.71   19.12
   0  -5   8  -10.14   11.28
   0   5   8   -4.18   10.71
   0   5   9   25.36   15.01
   0  -5   9    5.18   14.94
   0  -5  10   40.02   21.59
   0   5  10   -3.90   15.46
   0   6   0 2971.05  126.89
   0  -6   1    1.06    6.39
   0   6   1    6.77    6.95
   0  -6   1    5.61    7.04
   0  -6   1    5.91    4.47
   0   6   1    3.43    2.84
   0  -6   2   13.44    7.70
   0   6   2   15.85    2.82
   0  -6   2   23.87    5.40
   0   6   2   13.50    7.65
   0   6   3    3.78    6.26
   0  -6   3    2.71    6.75
   0   6   4 1510.89   73.31
   0  -6   4 1439.46   72.46
   0  -6   5    5.07    9.16
   0   6   5    8.10    9.70
   0   6   6   64.62   16.96
   0  -6   6  119.38   20.73
   0  -6   7    2.43   11.80
   0   6   7   20.78   13.28
   0   6   8   40.79   15.71
   0  -6   8    1.58   14.35
   0  -6   9   -7.37   15.98
   0   6   9  -13.77   12.65
   0  -7   0   -1.38    4.94
   0   7   0   -1.78    7.09
   0   7   1  711.06   30.34
   0  -7   1  642.68   32.51
   0   7   1  686.29   38.62
   0  -7   2   -1.92    7.16
   0   7   2   -1.65    6.69
   0  -7   2    2.14    6.95
   0  -7   2    0.41    4.16
   0  -7   3 1567.81   77.30
   0   7   3 1633.62   77.37
   0   7   4   -0.05    7.14
   0  -7   4   12.64    8.91
   0  -7   5  677.79   44.02
   0   7   5  661.70   43.48
   0   7   6  -10.44    9.41
   0  -7   6  -10.44    9.05
   0   7   7  124.56   23.18
   0  -7   7  183.00   28.02
   0  -7   8    4.82   13.92
   0   7   8  -10.38   11.41
   0  -7   9  105.38   26.94
   0   7   9  120.09   27.02
   0   8   0 4715.70  193.56
   0  -8   0 4448.99  183.39
   0  -8   1    0.63    4.69
   0   8   1   -1.18    6.91
   0   8  -1    1.31    7.25
   0   8   1    3.50    3.35
   0  -8   2   44.56    7.64
   0  -8   2   73.63   13.90
   0  -8   2   38.02   11.36
   0   8   2   27.37   10.30
   0  -8   3    8.91    8.44
   0   8   3    5.45    7.66
   0   8   4 1574.73   77.41
   0  -8   4 1434.26   76.45
   0   8   5  -15.74    7.52
   0  -8   5   -3.35    8.61
   0  -8   6   39.45   15.36
   0   8   6   61.86   17.35
   0  -8   7    6.27   14.12
   0   8   7   25.18   12.85
   0   8   8   28.80   17.07
   0  -8   8   18.05   16.96
   0  -8   9   10.69   16.89
   0   8   9    4.71   15.77
   0   9   0    2.41    8.01
   0  -9   0   -5.23    4.76
   0   9   1  799.26   48.74
   0   9  -1  891.60   49.89
   0   9   1  927.53   39.20
   0  -9   1  847.24   42.14
   0  -9   2   -9.80    5.83
   0  -9   2   -3.38    6.82
   0  -9   2   -2.33    4.89
   0   9   2   -3.89    6.80
   0  -9   3  498.45   35.40
   0  -9   3  487.63   34.21
   0   9   3  466.14   34.27
   0   9   4    6.89   10.14
   0  -9   4    2.18    8.23
   0   9   5   73.59   19.02
   0  -9   5   36.24   13.70
   0   9   6   -5.05   10.42
   0  -9   6    5.64   11.02
   0   9   7   70.07   20.09
   0  -9   7   38.56   18.32
   0  -9   8   -4.75   13.55
   0   9   8   15.22   13.75
   0  -9   9   -8.63   15.74
   0   9   9    8.32   18.85
   0  10   0 5691.48  251.49
   0  10   0 6141.61  245.04
   0 -10   0 6116.52  241.08
   0  10   1   10.04    8.84
   0 -10   1   -2.45    5.71
   0  10   1    7.88    3.97
   0  10  -1   -9.86    5.97
   0 -10   2  106.81   11.72
   0 -10   2  112.98   18.52
   0  10   2   64.64   14.96
   0 -10   2  111.84   19.10
   0  10   3    0.40    7.71
   0 -10   3    7.54   10.00
   0 -10   3    3.19    8.85
   0 -10   4  705.45   47.53
   0  10   4  670.32   46.07
   0 -10   5    5.57   11.24
   0  10   5   -4.21   10.91
   0 -10   6  114.23   23.89
   0  10   6   99.15   22.89
   0 -10   7    4.01   15.71
   0  10   7    1.42   12.75
   0 -10   8   56.38   22.15
   0  10   8   45.50   19.12
   0 -10   9   -4.54   17.26
   0  10   9    8.62   18.78
   0 -11   0   -0.47    6.14
   0  11   0    1.79    4.50
   0  11   0   14.56    9.97
   0 -11   1  836.44   42.31
   0  11   1  827.36   50.65
   0  11  -1  769.28   49.09
   0  11   2   -9.37    8.32
   0  11  -2    7.41    9.44
   0 -11   2    1.50    6.02
   0  11   3  606.66   43.56
   0 -11   3  724.73   46.99
   0 -11   3  613.65   43.01
   0 -11   4   32.37   14.52
   0 -11   4    6.81   11.99
   0  11   4    8.39   13.25
   0  11   5  192.10   27.48
   0 -11   5  151.67   25.77
   0  11   6   -8.01   12.92
   0 -11   6   -8.23   12.47
   0 -11   7   40.40   19.28
   0  11   7   42.11   18.44
   0  11   8  -10.24   14.15
   0 -11   8   10.43   18.74
   0  12   0 2120.86  105.05
   0 -12   0 2166.67   96.04
   0  12   0 2152.28   94.01
   0 -12  -1    1.65    3.84
   0 -12   1    8.71    6.92
   0  12   1   -9.37    8.47
   0  12  -1    1.99    9.77
   0  12   2    8.29   11.53
   0 -12   2   -3.15    6.43
   0  12  -2   -2.72    9.98
   0  12   3  -19.17    9.23
   0 -12   3   -5.65   10.80
   0 -12   3    7.98   11.84
   0 -12   4  620.80   46.71
   0 -12   4  611.76   44.96
   0  12   4  555.75   43.98
   0  12   5   -1.14   12.85
   0 -12   5   -4.62   13.33
   0 -12   5   15.20   14.18
   0  12   6   19.87   15.29
   0 -12   6   64.84   20.73
   0 -12   7  -17.17   13.86
   0  12   7    2.39   16.11
   0 -12   8   22.67   19.42
   0  12   8   60.68   24.51
   0  13   0  -10.42   10.12
   0 -13   0   -5.59    7.39
   0 -13   1  637.55   37.11
   0  13   1  657.44   46.43
   0  13  -1  618.45   45.70
   0  13   2   10.63   11.78
   0  13  -2   -3.81    9.54
   0  13  -3  282.90   32.26
   0  13   3  279.04   32.09
   0  13   4   -0.91   12.64
   0 -13   4   -5.06   13.08
   0 -13   4   12.58   13.27
   0 -13   5   92.06   22.26
   0  13   5   74.38   21.09
   0 -13   5   95.36   23.84
   0  13   6   11.15   15.94
   0 -13   6   20.05   16.39
   0 -13   6    0.38   14.83
   0 -13   7    5.69   17.37
   0  13   7   -9.18   15.95
   0  13   8    3.93   18.80
   0 -13   8   -7.60   16.97
   0  14   0 3049.73  143.62
   0 -14   0 2977.69  131.69
   0 -14  -1   -6.25    8.76
   0  14   1    2.49   12.23
   0  14  -1    5.65   12.79
   0  14  -2   31.36   14.64
   0  14   2   22.59   13.68
   0  14  -3   -6.25   10.90
   0  14   3    1.10   11.56
   0 -14   4  297.82   37.96
   0  14   4  276.39   35.59
   0 -14   4  327.28   37.76
   0  14   5   -3.16   12.35
   0 -14   5   -8.22   13.48
   0 -14   5   27.53   15.09
   0  14   6   42.18   19.04
   0 -14   6   28.97   18.67
   0 -14   6   58.40   22.63
   0 -14   7   30.14   20.87
   0  14   7   16.24   17.86
   0 -14   7  -11.47   15.80
   0 -15   0   -9.62    9.48
   0  15   0   -5.25   12.38
   0 -15  -1  525.47   36.36
   0  15   1  532.91   46.35
   0  15  -1  503.59   45.64
   0  15  -2   -6.19   13.23
   0  15   2    9.05   13.36
   0 -15  -2   -7.31    8.34
   0  15   3  202.00   31.24
   0  15  -3  243.88   33.32
   0  15  -4   18.29   13.95
   0  15   4   15.80   13.94
   0 -15   5    7.93   17.72
   0  15   5   38.64   17.55
   0 -15   5   48.24   20.15
   0 -15   6   30.09   20.06
   0  15   6   16.08   19.07
   0 -15   6   18.61   20.04
   0 -15   7   11.83   19.24
   0  15   7   13.39   20.57
   0 -15   7   30.79   21.32
   0  16   0  842.69   59.11
   0  16   1   28.68   15.60
   0 -16  -1   -1.84   10.28
   0  16  -1   11.31   14.12
   0  16   2   13.58   14.50
   0 -16  -2    7.70   12.16
   0  16  -2   41.36   18.40
   0  16   3   -2.67   12.59
   0  16  -3   11.13   14.71
   0  16  -4  507.62   49.00
   0  16   4  581.33   51.54
   0  16   5    4.39   16.70
   0  16   6   -9.34   17.09
   0 -16   6   20.80   19.51
   0 -16   6   27.99   20.48
   0  17   0    9.18   13.46
   0  17  -1  178.75   30.16
   0  17   1  133.26   26.48
   0  17  -2   27.25   16.00
   0 -17  -2   -4.70   10.93
   0  17   2    4.84   15.00
   0 -17  -3  558.64   42.96
   0  17   3  580.54   52.24
   0  17  -3  586.38   52.23
   0  17   4   10.38   16.61
   0  17  -4   32.31   17.38
   0  17  -5   18.19   17.14
   0  17   5   68.92   23.55
   0  18   0 1614.10   97.19
   0  18  -1   11.13   15.56
   0  18   1    3.13   14.44
   0  18   2  128.18   28.35
   0  18  -2  102.08   26.81
   0 -18  -3   14.36   13.81
   0  18   3   -5.75   17.35
   0  18  -3  -12.65   14.89
   0  18   4  379.17   46.24
   0  18  -4  345.69   44.51
   0 -18  -4  356.15   37.75
   0  19   0   24.93   20.39
   0  19   1  388.29   47.21
   0  19  -1  393.94   47.92
   0  19   2   -6.35   15.52
   0  19  -2    2.97   17.50
   0  19  -3  123.55   30.63
   0  19   3  148.69   32.39
   0  20   0  869.07   68.19
   0  20   1   24.83   19.78
   0  20  -1    2.23   16.45
   1   0   0    0.15    0.19
  -1   0   0   -0.03    0.16
   1   0   0   -0.01    0.17
  -1   0   0    0.26    0.16
  -1   0   1   48.58    5.00
  -1   0   1   54.08    5.18
   1   0   1   38.73    4.92
   1   0   2   55.45    7.94
  -1   0   2   42.31    7.51
  -1   0   2   35.15    6.65
  -1   0   3 1482.45   68.22
  -1   0   3 1617.49   68.85
   1   0   3 1463.43   67.86
  -1   0   4  124.02   15.12
   1   0   4  117.71   14.50
   1   0   5  449.96   30.04
  -1   0   5  404.92   29.32
   1   0   6  457.38   32.65
  -1   0   6  393.98   31.87
   1   0   7 2319.68  111.71
  -1   0   7 2277.56  111.72
   1   0   8  111.61   22.14
  -1   0   8  110.90   22.53
  -1   0   9  118.43   25.22
   1   0   9  107.85   24.10
  -1   0  10   36.55   19.40
   1   0  10   33.77   18.15
   1  -1   0   -1.60    1.06
   1   1   0   -0.70    0.99
   1   1   0    0.82    1.33
  -1  -1   0   -1.35    1.40
  -1  -1   0   -1.50    0.83
  -1  -1   0   -2.29    0.56
   1  -1   0    3.52    1.80
  -1   1   0   -0.48    1.26
  -1   1   0   -0.36    1.29
   1   1   1  220.99   12.05
  -1  -1   1  212.42   12.17
  -1   1   1  203.82   12.04
   1  -1   1  255.49   12.69
  -1  -1   1  208.99   12.11
  -1   1   1  212.48   11.40
  -1  -1   2   19.45    6.12
   1   1   2   14.23    5.89
   1  -1   2   29.93    6.84
  -1   1   2   11.28    4.82
  -1   1   2   17.19    6.25
  -1  -1   2   22.14    5.90
  -1  -1   3 1440.83   65.92
  -1   1   3 1446.33   64.66
  -1   1   3 1440.57   65.28
   1   1   3 1412.03   65.00
  -1  -1   3 1445.33   65.23
   1  -1   3 1438.13   65.32
  -1  -1   4 1388.69   65.64
  -1   1   4 1371.13   65.36
   1   1   4 1372.49   65.29
   1  -1   4 1355.23   65.48
   1   1   5   37.19   10.84
   1  -1   5   54.86   11.79
  -1   1   5   67.72   13.30
  -1  -1   5   59.16   12.85
   1   1   6  920.48   51.43
   1  -1   6  880.36   51.01
  -1  -1   6  813.42   49.83
  -1   1   6  830.22   50.70
   1  -1   7  619.99   42.47
  -1  -1   7  613.49   42.59
  -1   1   7  490.66   39.54
   1   1   7  529.07   40.27
   1   1   8  464.29   41.11
   1  -1   8  463.98   41.35
  -1   1   8  428.78   40.45
  -1  -1   8  480.21   39.74
   1   1   9   21.71   14.74
   1  -1   9    4.96   14.04
  -1  -1   9   28.93   17.19
  -1   1   9   10.50   14.90
   1  -1  10   87.12   26.16
  -1   1  10  166.35   30.95
  -1  -1  10  161.55   30.24
   1   1  10  181.63   31.81
  -1  -2   0   -8.18    1.01
   1   2   0   -5.96    1.76
  -1   2   0   -2.54    3.60
   1   2   0   -2.52    3.32
  -1  -2   0   -7.90    1.63
  -1   2   1    7.89    2.77
  -1   2  -1    5.61    1.91
  -1   2   1    6.46    3.86
   1   2   1    7.94    3.94
  -1  -2  -1    4.09    2.10
  -1  -2   1   -0.69    3.80
  -1  -2   1    4.83    3.26
  -1  -2   1    2.91    2.88
   1  -2   1    1.69    3.87
  -1   2   2  538.63   26.35
   1   2   2  586.43   28.37
  -1  -2   2  552.38   28.25
   1  -2   2  538.28   27.85
  -1  -2   2  548.33   28.58
  -1   2   2  515.51   27.76
  -1   2   3 3507.25  151.10
  -1   2   3 3727.94  151.28
   1   2   3 3667.29  151.34
  -1  -2   3 3637.91  151.34
   1  -2   3 3635.53  151.48
  -1  -2   4  303.81   23.02
   1   2   4  298.80   22.49
  -1   2   4  297.49   22.10
   1  -2   4  310.82   23.00
  -1   2   4  311.12   20.88
   1  -2   5   14.33    7.85
  -1  -2   5   16.43    8.41
   1   2   5   13.50    8.48
  -1   2   5    5.83    6.48
  -1  -2   6    7.44   10.46
  -1   2   6   14.00    9.92
   1   2   6   18.50   10.32
   1  -2   6   22.86   10.71
  -1  -2   7 1226.70   67.01
   1   2   7 1153.02   65.96
  -1   2   7 1143.18   66.00
   1  -2   7 1079.09   64.41
  -1   2   8   43.95   16.01
   1   2   8   46.21   15.38
  -1  -2   8   34.66   16.21
   1  -2   8   46.30   16.74
   1   2   9   98.66   23.34
  -1   2   9   77.47   20.06
   1  -2   9   49.97   18.65
  -1  -2   9   64.05   20.74
   1  -2  10   49.07   19.66
  -1  -2  10   58.81   21.70
  -1   2  10   66.25   22.78
   1   2  10   39.69   19.76
  -1  -3   0   -1.78    0.98
  -1   3   0   -2.09    4.59
   1   3   0    4.17    4.03
  -1   3   1 1155.72   49.74
   1  -3   1 1212.67   53.21
  -1  -3   1 1238.18   49.77
   1   3   1 1217.14   52.73
  -1   3   1 1199.98   52.95
  -1   3  -1 1199.22   47.95
  -1  -3   1 1168.01   52.85
   1  -3   1 1204.90   48.23
  -1  -3   2  487.28   26.36
   1   3   2  452.96   25.43
   1  -3   2  493.30   26.71
  -1   3   2  476.89   26.13
  -1   3   2  475.33   23.06
  -1   3   3  935.09   45.14
  -1  -3   3  919.64   45.28
   1   3   3  821.18   44.05
   1  -3   3  929.87   45.42
  -1   3   3  903.52   42.21
  -1   3   4 1765.18   76.84
  -1   3   4 1666.98   78.84
  -1  -3   4 1648.28   78.92
   1  -3   4 1672.34   78.95
   1   3   4 1741.02   79.11
   1  -3   5    5.21    6.91
  -1  -3   5   -6.59    7.14
  -1   3   5    0.93    6.84
   1   3   5    3.77    6.73
  -1   3   6  782.98   48.02
   1   3   6  766.45   47.70
  -1  -3   6  813.64   49.17
   1  -3   6  803.21   49.09
   1  -3   7  422.26   36.91
   1   3   7  416.14   35.97
  -1   3   7  349.72   34.32
  -1  -3   7  407.38   36.86
  -1   3   8  272.54   33.39
  -1  -3   8  333.62   35.90
   1   3   8  300.56   34.09
   1  -3   8  293.95   34.15
   1   3   9   -2.59   11.99
  -1  -3   9  -12.00   12.66
   1  -3   9   17.95   14.22
  -1   3   9   -8.25   12.13
  -1   3  10  249.74   37.38
   1  -3  10  295.56   39.55
  -1  -3  10  282.85   39.79
   1   3  10  242.12   36.47
  -1   4   0    7.58    6.35
  -1  -4   0   -1.47    1.25
   1   4   0    5.91    5.77
   1   4   1  299.31   18.60
   1  -4   1  274.95   13.96
  -1   4   1  285.61   13.86
  -1  -4   1  285.27   15.38
  -1   4   1  269.67   18.48
   1  -4   1  250.38   17.11
  -1  -4   1  285.80   18.68
   1  -4   1  258.75   18.42
   1  -4   2    1.76    5.01
  -1   4   2   -0.34    3.12
  -1  -4   2    0.01    5.58
  -1   4   2    5.37    5.76
   1   4   2    8.93    6.05
  -1  -4   3 1867.27   83.90
   1   4   3 1755.25   83.17
  -1   4   3 1957.99   80.34
  -1   4   3 1888.89   83.91
   1  -4   3 1862.44   84.17
  -1  -4   4  158.28   17.56
  -1   4   4  147.07   13.17
   1  -4   4  141.38   16.65
  -1   4   4  142.69   17.05
   1   4   4  122.23   15.94
   1  -4   5  429.96   30.11
   1   4   5  347.03   27.68
  -1   4   5  354.53   28.40
  -1  -4   5  435.85   30.52
  -1   4   6  394.49   31.66
   1   4   6  438.43   32.58
  -1  -4   6  339.51   31.71
   1  -4   6  360.30   32.64
   1   4   7 1685.90   90.09
   1  -4   7 1828.67   92.45
  -1   4   7 1701.06   90.24
  -1  -4   7 1795.47   91.77
   1   4   8   97.21   21.56
   1  -4   8  126.19   24.08
  -1   4   8  130.65   23.72
  -1  -4   8  131.90   25.48
   1  -4   9  171.24   29.62
   1   4   9   98.62   23.54
  -1   4   9  156.40   28.23
  -1  -4   9  144.80   28.25
  -1  -4  10    6.31   17.64
   1  -4  10   25.72   18.69
  -1   4  10   41.79   20.51
   1   4  10   16.61   16.30
  -1  -5   0   -0.58    2.35
  -1   5   0   -0.54    5.81
   1   5   0    0.07    5.22
   1  -5   1  567.92   32.91
   1  -5   1  601.69   32.22
   1   5   1  639.37   33.40
  -1  -5   1  641.08   29.42
  -1  -5   1  611.48   32.16
  -1  -5   1  611.28   33.45
  -1   5   1  615.40   33.15
  -1   5   1  633.24   27.78
   1  -5   1  638.94   27.94
  -1  -5   2    6.15    7.03
   1   5   2   -1.71    5.26
  -1   5   2   11.08    3.43
  -1   5   2   -6.30    4.98
  -1  -5   2    7.76    4.48
   1  -5   2    0.55    5.97
   1   5   3  381.73   26.60
   1  -5   3  330.47   24.69
  -1   5   3  381.55   20.14
  -1   5   3  364.86   26.69
  -1  -5   3  392.12   25.79
  -1   5   4  676.34   40.41
  -1   5   4  707.37   35.68
   1  -5   4  667.32   40.68
  -1  -5   4  685.37   40.96
   1   5   4  833.87   42.68
  -1  -5   5   12.20    9.39
  -1   5   5   17.78   10.36
   1   5   5   11.20   10.08
   1  -5   5    2.62    8.57
   1   5   6  883.57   52.29
  -1   5   6  867.87   52.24
  -1  -5   6  851.01   52.31
   1  -5   6  830.83   51.95
   1   5   7  600.18   43.45
   1  -5   7  569.15   43.11
  -1   5   7  575.94   42.96
  -1  -5   7  587.39   43.43
   1   5   8  401.83   39.66
  -1   5   8  394.50   39.50
   1  -5   8  362.13   38.70
  -1  -5   8  425.44   40.71
  -1  -5   9   12.48   15.97
  -1   5   9    0.22   12.76
   1  -5   9   -1.24   13.41
   1   5   9    4.21   12.84
  -1  -5  10   75.05   24.58
  -1   5  10   63.90   23.19
   1   5  10   86.20   23.79
   1  -5  10   29.51   19.07
  -1  -6   0   -1.65    3.40
   1   6   0   10.34    6.98
  -1   6   0   18.80    7.73
  -1   6   1   21.13    4.23
   1  -6   1   19.01    8.36
   1  -6   1   17.30    7.56
  -1   6   1   22.82    8.23
  -1  -6   1   10.00    5.08
   1  -6   1   16.68    5.19
   1   6   1   21.09    8.23
  -1  -6   1   18.40    7.35
  -1  -6   1   13.67    7.01
  -1  -6   2   19.06    5.52
   1   6   2   13.06    7.15
   1  -6   2    6.35    7.00
  -1   6   2   13.01    3.25
  -1  -6   2    8.18    7.51
  -1   6   2   17.96    7.85
   1  -6   2    8.10    3.99
  -1   6   3 2499.90  110.44
   1   6   3 2525.50  110.18
   1  -6   3 2424.72  109.61
  -1   6   3 2476.96  102.85
  -1  -6   3 2454.44  109.71
   1   6   4  120.09   17.36
   1  -6   4  114.84   17.10
  -1   6   4  148.18   11.79
  -1  -6   4  161.20   19.04
  -1   6   4  168.36   19.66
  -1  -6   5   46.42   13.89
  -1   6   5   42.20   13.16
   1  -6   5   54.76   14.42
   1   6   5   34.66   11.81
  -1   6   6   75.49   17.72
  -1  -6   6  121.90   21.52
   1  -6   6   96.16   19.23
   1   6   6   87.82   18.29
  -1  -6   7 1151.65   67.65
   1  -6   7 1093.68   67.13
   1   6   7 1061.17   65.72
  -1   6   7 1202.28   68.18
  -1   6   8  135.84   25.37
   1  -6   8   83.43   22.12
  -1  -6   8  104.80   23.60
   1   6   8  112.62   23.50
   1  -6   9   73.65   22.03
  -1  -6   9  116.14   26.94
  -1   6   9   87.99   24.12
   1   6   9   53.97   19.08
  -1   7   0   -1.37    6.45
  -1  -7   0    7.22    4.78
   1   7   0    1.37    5.95
  -1   7   1   29.42    4.81
   1   7   1   19.23    8.61
   1  -7   1   18.21    5.40
  -1   7   1   21.85    8.99
  -1  -7   1   26.12    6.42
  -1   7   2  356.77   17.37
   1  -7   2  408.81   20.00
  -1  -7   2  374.36   21.12
  -1   7   2  361.45   26.58
   1   7   2  363.64   26.35
  -1  -7   2  364.05   25.62
   1  -7   2  347.46   25.33
  -1  -7   2  394.63   27.32
   1  -7   2  389.71   27.39
  -1   7   3  787.23   44.00
   1  -7   3  715.85   43.42
  -1  -7   3  828.37   44.72
   1   7   3  766.55   43.38
  -1   7   3  733.91   33.97
   1   7   4 1070.20   59.06
  -1   7   4 1140.12   59.94
   1  -7   4 1205.79   60.88
  -1  -7   4 1059.29   59.24
  -1  -7   5   41.39   12.42
  -1   7   5   33.25   12.70
   1   7   5   30.70   12.58
   1  -7   5   21.41   12.01
   1   7   6  527.77   40.09
   1  -7   6  528.98   40.20
  -1  -7   6  545.02   40.45
  -1   7   6  535.13   40.52
   1   7   7  291.53   33.52
   1  -7   7  365.46   36.78
  -1   7   7  303.95   34.06
  -1  -7   7  336.42   35.63
  -1  -7   8  169.08   29.72
   1   7   8  150.28   27.49
  -1   7   8  183.38   30.04
   1  -7   8  208.06   31.85
   1   7   9   20.56   16.32
   1  -7   9   -4.60   15.96
  -1   7   9   27.71   18.54
  -1  -7   9   55.74   22.11
  -1  -8   0    1.57    5.55
  -1   8   0    0.42    6.22
   1   8   0  -10.98    5.66
  -1   8   0    1.28    4.05
  -1   8   1   16.89    8.86
   1   8   1   12.97    3.27
  -1   8   1   23.82    4.91
   1  -8   1   18.04    6.00
  -1   8  -1   24.59    9.64
  -1  -8   1   22.57    7.03
   1   8  -1   11.81    8.22
   1   8   1   12.44    8.21
  -1  -8   2   54.70   12.00
   1  -8   2   64.53   13.16
   1   8   2   43.85   11.83
   1  -8   2   69.24    8.15
  -1  -8   2   79.48   14.45
  -1   8   2   59.93   13.44
  -1  -8   2   59.50    9.05
   1  -8   2   67.04   14.11
  -1   8   3 1239.56   53.07
  -1   8   3 1238.10   64.62
  -1  -8   3 1309.54   65.99
   1  -8   3 1326.24   66.40
   1   8   3 1206.56   64.16
   1  -8   4  100.88   18.77
  -1   8   4   98.05   17.70
   1   8   4   85.81   16.91
  -1  -8   4   90.27   17.63
   1  -8   5   33.82   14.05
   1   8   5   26.17   12.41
  -1  -8   5   16.78   12.20
  -1   8   5   33.75   13.74
   1   8   6   18.13   14.71
  -1  -8   6   21.37   13.81
  -1   8   6   42.46   15.97
   1  -8   6   34.12   14.09
  -1   8   7  807.05   54.61
   1   8   7  787.90   53.63
  -1  -8   7  827.23   55.52
   1  -8   7  689.82   52.47
   1   8   8   39.34   16.91
  -1  -8   8   46.98   19.69
  -1   8   8   51.74   18.21
   1  -8   8   49.75   18.51
  -1   8   9   76.30   24.15
   1  -8   9   48.82   21.79
  -1  -8   9   56.50   22.39
   1   8   9   33.18   19.56
  -1   9   0    7.55    7.51
   1  -9   0    8.95    5.69
  -1  -9   0    4.81    5.69
  -1   9   0   -3.18    4.07
   1   9   0   -2.79    5.61
  -1  -9   1  371.31   22.82
   1   9   1  360.83   27.82
   1   9   1  377.69   17.72
  -1   9   1  370.27   19.39
  -1   9  -1  283.72   26.91
  -1   9   1  337.01   27.56
   1   9  -1  306.99   26.48
   1  -9   1  372.08   21.59
  -1  -9   2   20.13   10.18
  -1  -9   2   20.75    9.94
  -1   9   2   19.79    9.34
   1  -9   2   22.09   10.82
   1  -9   2   24.61    6.10
   1  -9   2   -8.19    7.17
   1   9   2   16.04    9.34
  -1  -9   2   12.85    5.94
  -1  -9   3  197.71   23.77
  -1  -9   3  272.46   26.66
  -1   9   3  247.31   25.36
   1   9   3  231.91   24.68
   1  -9   3  234.96   25.46
   1  -9   3  256.26   25.64
  -1  -9   4  389.96   32.46
  -1   9   4  349.69   31.86
   1  -9   4  456.96   34.12
   1   9   4  375.08   31.34
   1   9   5   16.09   13.63
   1  -9   5   -3.00   10.56
  -1  -9   5   25.58   13.63
  -1   9   5   25.42   14.87
  -1  -9   6  313.52   34.03
   1  -9   6  354.74   35.77
   1   9   6  333.41   35.08
  -1   9   6  364.71   36.05
   1   9   7  405.66   41.29
  -1   9   7  432.82   42.04
   1  -9   7  382.97   40.33
  -1  -9   7  412.35   41.31
   1  -9   8  247.29   36.11
  -1   9   8  261.70   36.58
  -1  -9   8  220.61   34.91
   1   9   8  265.54   36.60
   1   9   9    3.08   16.91
  -1   9   9   36.74   18.00
  -1  -9   9   -5.97   15.89
   1  -9   9   22.14   19.85
  -1  10   0   -4.49    3.94
  -1 -10   0   12.95    7.24
  -1  10   0   14.39    9.01
   1  10   0    4.97    8.48
   1 -10   0   -3.85    5.53
  -1 -10   1   46.79    9.64
   1  10   1   45.42   12.79
   1  10  -1   30.56   11.27
  -1  10  -1   42.82   12.98
   1 -10   1   44.94    9.02
   1  10   1   55.77    5.69
  -1  10   1   58.78   13.95
  -1  10   1   52.43    6.96
   1  10   2   13.10   10.20
   1 -10   2   11.13   10.41
  -1 -10   2    3.60    5.81
   1 -10   2    3.34    9.54
  -1 -10   2   11.44    9.89
   1 -10   2   -1.81    5.00
  -1 -10   2   -1.34    9.25
  -1  10   2   20.76   11.12
  -1  10   3  665.66   45.14
   1 -10   3  666.49   44.34
   1  10   3  802.77   47.17
  -1 -10   3  636.99   45.11
   1 -10   3  793.69   48.59
  -1 -10   3  801.04   46.41
   1 -10   4   98.01   20.32
  -1  10   4  130.67   22.27
  -1 -10   4  110.50   21.11
   1  10   4  122.41   21.13
  -1 -10   5   17.45   12.65
   1  10   5   20.64   13.22
   1 -10   5   14.51   13.21
  -1  10   5   32.88   14.67
  -1  10   6   31.70   17.00
   1  10   6   25.07   16.79
   1 -10   6   73.43   19.81
  -1 -10   6   31.99   16.29
   1  10   7  920.53   63.63
  -1  10   7  962.85   64.89
  -1 -10   7 1002.42   65.47
   1 -10   7  961.91   64.63
   1 -10   8   63.51   22.45
  -1 -10   8   42.21   21.02
   1  10   8   18.97   16.78
  -1  10   8   51.54   19.64
  -1 -10   9   40.49   19.63
  -1  10   9   76.73   25.13
   1  10   9   51.66   23.59
   1 -10   9   51.88   24.23
  -1 -11   0   -5.63    6.06
  -1  11   0    4.18    8.67
   1 -11   0    2.12    7.09
   1  11   0   -0.30    4.02
  -1  11   0    5.33    5.41
   1  11   0    0.05    8.80
   1  11   1   56.18   14.57
  -1  11  -1   44.68   14.62
   1  11  -1   45.61   14.45
  -1  11   1   65.64   15.94
  -1 -11  -1   49.49   11.33
  -1  11   1   69.93    7.72
  -1 -11   1   45.21   10.40
   1 -11   1   57.45   10.55
  -1  11   2   85.92   17.61
  -1 -11   2  117.11   13.68
  -1  11  -2   94.79   18.32
   1 -11   2  131.06   12.88
   1  11  -2  147.57   21.67
   1  11   2  113.91   20.11
  -1 -11   3  483.96   38.04
   1 -11   3  501.68   37.13
  -1  11   3  482.21   36.93
   1  11   3  418.97   35.02
  -1 -11   3  470.01   36.47
   1 -11   3  437.83   36.86
  -1  11   4  455.68   37.15
   1 -11   4  453.74   40.03
  -1 -11   4  468.91   40.40
   1  11   4  471.15   38.14
  -1 -11   4  420.73   37.76
   1 -11   4  466.37   39.37
  -1 -11   5   72.05   19.89
   1 -11   5   59.70   17.95
  -1  11   5   66.30   18.48
   1  11   5   54.19   17.44
  -1  11   6  311.65   36.52
   1 -11   6  314.37   36.95
   1  11   6  318.99   36.74
  -1 -11   6  324.30   37.44
  -1  11   7  144.15   29.35
   1 -11   7  191.41   32.41
   1  11   7  146.70   28.35
  -1 -11   7  189.05   31.72
  -1  11   8  168.13   31.05
   1  11   8   96.35   25.55
   1 -11   8  145.14   32.19
  -1 -11   8  105.77   27.76
   1 -12   0   -2.69    6.81
  -1  12   0    0.02   10.31
  -1  12   0    5.00    5.39
   1  12   0    5.55   10.32
  -1 -12   0   -2.54    6.90
  -1  12  -1   -2.73    9.84
  -1  12   1    1.82   10.11
  -1 -12   1   13.45    7.20
   1  12   1  -11.77    8.25
   1  12  -1    4.46   10.62
  -1 -12  -1    3.59    6.22
   1 -12   1    5.47    6.94
   1  12  -2   12.57   10.78
  -1  12   2   23.81   12.53
  -1  12  -2   26.72   13.60
   1  12   2   17.53   12.55
  -1 -12   2   10.92    7.94
   1  12   3  856.86   56.05
   1 -12   3  931.42   57.07
   1 -12   3  897.93   58.23
  -1 -12   3  883.08   58.34
  -1 -12   3 1080.76   59.40
  -1  12   3  874.51   56.42
  -1 -12   4   50.38   18.01
   1 -12   4   58.01   17.44
  -1 -12   4   45.29   16.92
   1  12   4   12.60   13.11
   1 -12   4   21.12   13.26
  -1  12   4   63.79   18.25
   1  12   5    4.28   13.37
   1 -12   5    9.68   13.36
  -1 -12   5   -2.03   12.48
   1 -12   5   17.15   13.94
  -1 -12   5    5.11   12.50
  -1  12   5   18.62   14.79
   1 -12   6   17.19   15.69
  -1 -12   6   32.94   17.57
  -1  12   6   48.86   17.94
   1  12   6   33.33   16.85
   1  12   7  449.17   46.45
  -1 -12   7  422.23   45.94
  -1  12   7  446.81   47.31
   1 -12   7  394.05   44.87
   1 -12   8   11.30   18.44
   1  12   8    8.86   16.60
  -1  12   8   13.39   18.72
  -1 -12   8   25.52   18.73
  -1  13   0   25.56   12.88
   1 -13   0   -4.75    6.45
   1  13   0  -10.83    9.56
  -1 -13   0   14.44    9.38
   1  13  -1  187.79   26.65
   1 -13   1  204.57   18.85
   1  13   1  137.91   23.73
  -1 -13   1  162.16   18.25
  -1  13   1  185.74   26.86
  -1  13  -1  174.27   25.94
   1 -13  -1  154.82   18.95
  -1  13  -2   60.07   16.84
   1  13   2   62.94   18.01
  -1  13   2   24.91   14.44
   1  13  -2   14.36   13.38
   1  13  -3  240.01   30.58
   1  13   3  282.62   32.17
  -1  13   3  311.66   33.87
  -1  13  -3  350.38   34.93
  -1  13   4  220.34   30.91
  -1 -13   4  227.60   31.34
   1 -13   4  210.25   31.18
   1 -13   4  227.42   32.43
   1  13   4  237.92   31.98
  -1 -13   4  228.61   32.15
   1 -13   5   12.37   14.88
  -1  13   5   16.63   14.50
   1 -13   5   28.87   17.99
  -1 -13   5   38.61   17.95
   1  13   5   30.70   16.21
  -1 -13   5   11.99   14.60
   1 -13   6  291.49   37.92
  -1 -13   6  322.04   38.77
  -1 -13   6  302.43   39.33
   1  13   6  269.68   37.56
  -1  13   6  308.11   39.98
   1 -13   6  353.86   41.10
   1  13   7  178.97   33.15
  -1 -13   7  167.94   32.77
  -1  13   7  162.16   31.29
   1 -13   7  151.27   32.00
   1  13   8  190.77   36.55
  -1  13   8  154.81   34.10
  -1 -13   8  214.21   36.48
   1 -13   8  131.44   31.72
  -1  14   0   15.07   13.04
   1  14   0   15.22   12.46
  -1 -14   0   10.78    8.82
   1 -14   0    7.70    9.49
   1 -14  -1   38.18   11.96
   1  14  -1   87.27   20.37
  -1  14  -1   10.71   13.53
  -1  14   1   31.14   15.23
  -1 -14   1   67.32   14.02
   1  14   1   59.28   17.21
  -1  14  -2   -0.57   11.03
  -1 -14  -2   10.19   10.42
   1  14   2   16.18   13.06
   1  14  -2   18.89   13.05
  -1  14   2    2.70   11.47
   1  14   3  397.95   39.37
   1  14  -3  381.50   39.07
  -1  14   3  416.16   40.12
  -1  14  -3  350.87   38.03
  -1 -14   4   25.26   15.90
  -1 -14   4   -7.44   13.14
   1  14   4   20.42   14.69
   1 -14   4    5.59   14.66
   1 -14   4   16.20   15.07
  -1  14   4   12.91   14.14
   1  14   5  129.33   26.20
   1 -14   5  139.37   28.56
  -1  14   5  176.28   30.44
   1 -14   5   81.78   23.08
  -1 -14   5   91.94   23.84
  -1 -14   5  157.11   29.06
  -1 -14   6  139.93   27.88
   1  14   6   85.65   24.38
  -1  14   6  144.66   28.47
   1 -14   6   82.61   24.26
  -1 -14   6  106.03   26.44
   1 -14   6  142.90   29.41
   1 -14   7  776.03   64.45
  -1  14   7  909.00   66.89
   1  14   7  954.24   67.59
   1 -14   7  779.15   61.67
  -1 -14   7  868.80   64.12
  -1 -14   7  772.07   64.05
  -1  15   0    3.71   13.27
  -1 -15   0   16.13   11.42
   1  15   0    7.65   12.98
   1  15   1   95.44   22.97
   1 -15  -1  136.10   19.99
  -1  15  -1  149.65   27.21
  -1 -15  -1  149.12   20.69
   1  15  -1  114.35   24.12
  -1  15   1  114.89   24.59
   1 -15  -2   -5.88    9.44
  -1  15  -2   29.08   15.49
   1  15  -2   33.62   16.49
   1  15   2   17.25   13.80
  -1  15   2    9.45   14.05
  -1 -15  -2    2.73   10.41
   1  15   3   82.07   20.76
  -1  15   3   65.35   19.72
  -1  15  -3   68.04   20.63
   1  15  -3  110.27   23.15
  -1  15  -4  337.46   38.33
   1  15  -4  306.76   36.98
  -1  15   4  311.39   38.44
   1  15   4  333.10   38.79
   1 -15   5   21.73   18.02
   1 -15   5    5.07   15.89
  -1  15   5    0.60   15.00
  -1 -15   5   -8.52   15.19
   1  15   5   -3.15   13.79
  -1 -15   5    5.69   16.01
  -1 -15   6  374.67   45.31
   1  15   6  416.81   47.56
   1 -15   6  416.64   47.01
  -1 -15   6  467.96   50.26
   1 -15   6  355.69   45.75
  -1  15   6  372.04   46.31
  -1  15   7  195.18   37.39
   1 -15   7  234.09   38.90
  -1 -15   7  284.50   41.73
   1 -15   7  274.93   41.81
   1  15   7  146.28   33.44
  -1 -15   7  228.16   39.77
   1  16   0   26.69   14.35
  -1  16   0   23.87   14.76
  -1  16  -1  -12.04   11.07
  -1 -16  -1    5.53   11.74
   1  16  -1   16.15   14.38
   1  16   1   12.80   13.70
   1 -16  -1   -8.08    9.99
  -1  16   1   32.15   14.46
  -1  16   2   21.92   15.03
   1 -16  -2    0.54    9.60
  -1  16  -2   28.54   15.09
  -1 -16  -2    6.41   10.72
   1  16   2  -22.83   11.53
   1  16  -2    6.64   14.36
  -1  16   3  543.63   48.88
   1  16  -3  497.82   47.44
  -1  16  -3  503.36   48.14
   1  16   3  455.54   45.77
  -1 -16  -3  517.94   39.33
   1  16  -4  141.29   27.50
   1  16   4  119.93   27.12
  -1  16  -4  141.95   29.05
  -1  16   4  179.22   31.91
  -1  16   5   26.80   19.15
   1  16   5    9.38   17.38
  -1  16   6   40.33   22.51
  -1 -16   6   20.00   19.57
   1 -16   6   -7.46   15.68
  -1 -16   6  -10.71   16.80
   1  16   6   11.57   18.25
   1 -16   6   27.96   20.05
   1  17   0   10.94   14.52
  -1  17   0    6.25   13.96
  -1  17   1   25.12   16.72
   1  17   1   14.91   15.53
   1  17  -1   14.26   14.65
  -1  17  -1   19.74   15.57
  -1 -17  -2  131.36   23.01
  -1  17  -2  103.98   26.14
  -1  17   2   88.34   24.17
   1  17  -2  125.46   26.37
   1  17   2  120.47   25.70
  -1 -17  -3  229.06   29.55
  -1  17  -3  346.97   40.81
   1 -17  -3  266.69   30.67
  -1  17   3  227.55   35.90
   1  17   3  244.97   36.44
   1  17  -3  223.40   35.07
   1  17  -4  340.47   42.87
  -1  17   4  356.73   44.27
  -1  17  -4  480.88   48.50
   1  17   4  407.04   46.12
  -1  17  -5   20.18   18.87
  -1  17   5    3.03   16.84
   1  17  -5   -7.55   13.47
   1  17   5    9.51   17.87
  -1  18   0   12.73   18.16
   1  18   0   31.10   20.00
   1  18   1   27.41   16.79
  -1  18  -1    8.30   16.29
  -1  18   1   17.88   17.01
   1  18  -1  -12.20   12.93
  -1  18   2   36.80   18.43
  -1  18  -2   -3.38   14.14
   1  18  -2  -12.55   13.76
   1  18   2   12.09   15.78
   1  18  -3  380.73   45.34
  -1  18   3  393.17   44.98
   1 -18  -3  285.64   33.22
   1  18   3  335.12   42.35
  -1  18  -3  255.73   39.46
  -1 -18  -3  336.67   35.36
   1  18  -4   33.89   19.24
   1  18   4   35.20   19.90
  -1 -18  -4   22.06   16.11
  -1  18  -4   35.02   21.34
  -1  18   4   91.28   26.57
   1  19   0    6.72   16.13
  -1  19   0  -14.08   15.08
  -1  19  -1   42.28   21.10
   1  19  -1   54.72   21.13
  -1  19   1   66.53   23.87
   1  19   1   61.08   22.09
   1  19   2   15.06   17.32
  -1  19   2   -9.93   15.51
   1  19  -2    2.33   16.23
  -1  19  -2   28.43   17.80
  -1  19  -3   54.21   24.33
  -1  19   3   78.41   25.81
   1  19   3   87.18   26.20
   1  19  -3   63.27   25.54
   1  20   0   32.88   20.79
  -1  20   0    8.40   18.70
   1  20  -1   49.60   22.19
  -1  20  -1   25.14   20.25
  -1  20   1    6.05   21.65
   1  20   1   -8.20   15.82
  -2   0   0   -3.37    0.73
   2   0   0   -3.21    0.93
   2   0   1 5286.29  207.46
  -2   0   1 5225.72  210.83
  -2   0   1 5193.40  207.43
  -2   0   2 3033.30  124.76
  -2   0   2 2946.24  122.89
   2   0   2 3008.45  122.91
  -2   0   3 1512.23   68.62
   2   0   3 1552.03   68.35
  -2   0   3 1473.43   67.90
   2   0   4  768.32   41.95
  -2   0   4  809.64   42.18
  -2   0   4  782.66   42.39
   2   0   5   10.59    7.10
  -2   0   5   15.80    8.66
   2   0   6   26.79   11.13
  -2   0   6   32.42   12.76
  -2   0   7   15.41   12.66
   2   0   7   26.32   12.32
  -2   0   8   14.42   13.79
   2   0   8   -4.05   10.82
   2   0   9   -2.42   12.76
  -2   0   9   10.63   15.12
  -2   0  10  144.28   30.07
   2   0  10  141.94   28.84
  -2   1   0 8771.27  351.14
   2   1   0 8801.26  347.31
  -2  -1   0 8877.81  346.70
   2   1   0 8745.63  351.49
  -2  -1   0 8694.17  339.02
   2  -1   1 1295.55   51.99
  -2  -1   1 1209.05   52.74
   2   1   1 1259.53   51.56
  -2   1   1 1237.38   52.14
  -2   1   1 1196.25   51.62
  -2  -1   1 1219.17   51.58
   2  -1   2   29.80    7.02
  -2   1   2   30.94    7.39
  -2   1   2   42.36    6.75
  -2  -1   2   37.34    7.21
   2   1   2   47.02    7.63
  -2  -1   2   52.63    7.71
  -2  -1   3  733.46   38.01
   2  -1   3  736.59   37.61
  -2   1   3  723.89   37.00
  -2  -1   3  695.25   37.20
   2   1   3  725.39   37.28
  -2   1   3  792.39   38.29
  -2   1   4 1023.29   51.65
   2  -1   4 1048.39   51.94
  -2  -1   4  988.33   51.51
   2   1   4 1041.43   51.73
  -2  -1   4  991.06   51.97
  -2   1   4 1045.31   51.04
   2   1   5  112.19   16.18
  -2  -1   5  116.21   16.97
   2  -1   5  164.34   18.69
  -2   1   5  130.61   17.33
   2   1   6  184.50   22.71
  -2   1   6  265.65   26.12
  -2  -1   6  205.60   23.88
   2  -1   6  192.52   22.96
  -2   1   7   19.25   13.10
   2   1   7   24.98   12.58
   2  -1   7   30.82   13.55
  -2  -1   7    8.40   11.13
  -2  -1   8   45.49   17.60
  -2   1   8   50.62   16.82
   2  -1   8   44.50   17.02
   2   1   8   63.69   18.66
  -2  -1   9    2.14   14.05
   2  -1   9   16.94   15.74
  -2   1   9   19.84   14.99
   2   1   9   20.35   15.01
   2  -1  10  526.16   49.58
  -2   1  10  392.26   46.90
   2   1  10  539.92   50.76
  -2  -1  10  476.15   49.05
   2   2   0 1168.43   49.22
  -2  -2   0 1218.95   48.56
  -2  -2   0 1150.75   48.11
  -2   2   0 1065.28   49.42
   2   2   0 1239.76   48.54
  -2   2   0 1162.56   49.42
  -2  -2   1  149.95   10.66
   2   2   1  161.85   10.53
   2  -2   1  138.15   10.59
  -2   2   1  145.35    9.41
  -2   2   1  155.39   10.50
  -2  -2   1  158.63   10.86
  -2  -2   2  725.64   36.04
   2   2   2  788.25   36.15
  -2  -2   2  769.42   36.90
   2  -2   2  762.02   36.40
  -2   2   2  746.40   36.17
  -2   2   2  736.77   34.80
  -2   2   3  909.52   44.85
  -2  -2   3  961.98   46.45
   2   2   3  952.68   46.05
  -2   2   3  891.47   45.97
  -2  -2   3  973.36   47.32
   2  -2   3 1002.79   46.94
   2   2   4  152.31   16.06
  -2  -2   4  110.17   15.00
  -2   2   4   94.87   14.06
  -2   2   4  136.08   13.96
   2  -2   4  131.30   15.52
  -2  -2   5  294.85   24.43
  -2   2   5  268.20   24.33
   2  -2   5  323.15   24.90
   2   2   5  292.02   24.00
  -2  -2   6   87.91   17.37
   2   2   6   80.06   16.30
  -2   2   6   78.96   16.60
   2  -2   6   93.05   16.84
  -2   2   7   27.52   13.83
   2   2   7   33.90   13.72
   2  -2   7   27.61   13.21
  -2  -2   7   32.71   14.46
  -2   2   8   20.04   14.04
   2  -2   8   34.64   14.93
   2   2   8   34.72   16.03
  -2  -2   8   10.50   14.30
   2   2   9  114.52   24.31
  -2  -2   9  169.30   29.27
  -2   2   9  180.88   30.29
   2  -2   9  132.32   26.91
   2  -2  10   83.66   24.00
   2   2  10  161.57   30.05
  -2   2  10   84.75   24.81
  -2  -2  10  104.04   26.91
  -2   3   0 3000.82  121.69
  -2  -3   0 2972.88  120.47
   2   3   0 2984.64  121.43
  -2   3   0 2926.35  121.83
  -2  -3   0 3023.47  118.46
  -2  -3   1 1589.91   68.02
  -2   3  -1 1625.50   63.13
   2  -3   1 1528.65   68.42
  -2   3   1 1625.07   66.52
  -2  -3   1 1632.90   65.74
   2   3   1 1645.31   68.22
  -2  -3   1 1640.25   68.54
  -2   3   1 1470.04   67.98
   2  -3   1 1599.66   63.37
  -2  -3   2    2.10    5.13
   2  -3   2    2.77    5.36
   2   3   2    5.38    5.00
  -2  -3   2    1.52    5.03
  -2   3   2    4.72    5.00
  -2   3   2    4.87    3.99
   2  -3   3  996.88   52.10
   2   3   3 1060.47   52.21
  -2   3   3 1152.52   50.89
  -2  -3   3 1168.35   53.32
  -2   3   3 1118.35   52.84
   2  -3   4 2921.27  124.92
  -2   3   4 2774.12  124.19
  -2  -3   4 2813.85  124.46
   2   3   4 3005.86  124.64
  -2   3   4 2792.61  122.56
   2   3   5  227.66   22.47
   2  -3   5  229.13   22.92
  -2   3   5  225.15   22.56
  -2  -3   5  259.04   23.74
  -2  -3   6   87.93   17.61
  -2   3   6   68.51   16.25
   2   3   6   83.22   17.07
   2  -3   6   69.89   16.20
   2  -3   7   28.25   12.55
   2   3   7   31.54   13.78
  -2  -3   7   28.38   14.03
  -2   3   7   29.40   13.56
   2  -3   8   62.65   17.44
  -2   3   8   73.04   19.49
   2   3   8   48.88   16.61
  -2  -3   8   95.60   21.50
   2   3   9   75.76   20.92
  -2   3   9   61.38   20.07
   2  -3   9   78.97   20.49
  -2  -3   9   29.64   17.25
  -2  -3  10  646.14   56.57
  -2   3  10  644.97   56.24
   2  -3  10  598.84   54.55
   2   3  10  503.68   51.47
  -2   4   0 5277.02  218.36
   2   4   0 5459.18  218.10
  -2   4   0 5505.91  218.72
   2  -4   1  906.10   39.97
   2  -4   1  827.16   41.06
  -2  -4   1  848.10   40.74
   2  -4   1  854.57   34.92
  -2   4   1  834.98   37.05
   2   4   1  871.30   40.52
  -2  -4   1  791.91   37.46
  -2   4   1  847.58   40.94
  -2  -4   2  372.75   24.54
   2  -4   2  467.67   26.03
  -2   4   2  426.76   25.33
   2   4   2  401.01   24.37
  -2   4   2  458.75   21.64
  -2  -4   3  180.62   16.91
  -2   4   3  191.08   13.66
   2  -4   3  201.54   17.88
  -2   4   3  178.03   16.94
   2   4   3  184.80   16.98
   2   4   4  192.36   18.92
  -2  -4   4  190.34   19.14
  -2   4   4  174.51   18.77
  -2   4   4  185.29   14.85
   2  -4   4  179.48   18.51
  -2   4   5   30.16   10.85
   2  -4   5   25.39   10.53
   2   4   5   22.22    9.73
  -2  -4   5   12.31    9.69
  -2   4   5   18.30    6.93
  -2   4   6   66.56   15.48
   2  -4   6   61.16   15.17
  -2  -4   6   77.37   16.68
   2   4   6   73.68   16.27
   2  -4   7   36.47   14.55
  -2   4   7   14.59   12.70
   2   4   7   33.61   13.65
  -2  -4   7   16.72   12.90
   2  -4   8   88.04   20.72
  -2   4   8   60.66   18.75
  -2  -4   8   44.00   18.74
   2   4   8   54.44   18.06
  -2  -4   9   -4.28   13.82
   2   4   9   10.35   13.34
  -2   4   9   -7.43   13.54
   2  -4   9   15.68   14.18
  -2  -4  10   78.81   25.74
   2  -4  10   60.20   22.89
   2   4  10  102.56   26.75
  -2   4  10  103.68   26.00
  -2   5   0 4278.75  175.29
   2   5   0 4287.92  174.76
  -2   5   0 4202.65  173.26
  -2  -5   1 1090.43   49.07
   2  -5   1 1123.45   51.53
   2  -5   1 1143.29   53.82
   2  -5   1 1102.09   46.37
  -2  -5   1 1092.86   50.89
  -2  -5   1 1127.55   53.19
  -2   5   1 1155.21   48.58
  -2   5   1 1166.77   53.70
   2   5   1 1110.60   52.63
   2   5   2   54.35   10.01
  -2   5   2   52.82    5.98
  -2   5   2   47.73    9.98
  -2  -5   2   56.91   10.24
  -2  -5   2   49.38    7.31
   2  -5   2   35.67    9.48
   2   5   3  433.03   28.55
  -2  -5   3  432.49   27.74
   2  -5   3  420.26   27.88
  -2   5   3  413.09   28.75
  -2   5   3  436.79   22.84
  -2  -5   4  491.20   33.31
   2   5   4  524.07   33.30
  -2   5   4  583.62   29.56
  -2   5   4  515.00   33.76
   2  -5   4  542.96   34.14
   2   5   5   24.33   11.14
  -2   5   5   19.30   10.74
  -2  -5   5   18.20   10.11
   2  -5   5   10.78    9.74
   2  -5   6  186.48   23.85
  -2   5   6  147.43   22.44
   2   5   6  201.52   24.33
  -2  -5   6  205.00   24.67
   2   5   7    0.22    9.51
  -2  -5   7   15.52   12.75
  -2   5   7   -1.04   11.99
   2  -5   7   23.33   12.58
  -2  -5   8  297.07   34.87
  -2   5   8  212.97   31.29
   2   5   8  330.91   35.85
   2  -5   8  274.07   33.74
   2  -5   9   39.65   17.85
   2   5   9   22.98   15.85
  -2   5   9   12.76   13.74
  -2  -5   9   14.07   14.70
   2  -5  10  253.79   39.05
  -2   5  10  245.79   36.99
  -2  -5  10  220.02   36.55
   2   5  10  220.82   36.15
   2   6   0  591.08   33.29
  -2   6   0  596.72   33.87
  -2   6   0  595.43   29.16
   2  -6   1   18.71    7.59
  -2   6   1   15.91    4.46
  -2  -6   1   19.91    8.26
  -2   6   1   15.18    7.74
   2   6   1   19.04    7.65
  -2  -6   1   11.10    6.50
   2  -6   1   14.38    4.50
  -2  -6   1   17.03    6.23
   2  -6   1   20.69    7.26
  -2  -6   2  419.90   26.64
  -2   6   2  378.09   19.06
  -2  -6   2  425.56   22.16
  -2   6   2  357.29   25.41
   2  -6   2  347.71   25.35
   2   6   2  374.09   25.08
  -2  -6   3  404.77   29.02
   2   6   3  480.70   30.04
  -2   6   3  455.55   23.61
  -2   6   3  449.69   30.25
   2  -6   3  546.77   31.64
  -2   6   4  220.28   15.73
   2   6   4  214.13   21.99
  -2  -6   4  216.85   22.08
   2  -6   4  279.82   24.15
  -2   6   4  241.87   23.02
  -2   6   5  164.86   21.49
   2   6   5  124.22   19.49
   2  -6   5  123.34   19.47
  -2  -6   5  170.93   21.22
   2   6   6   45.19   13.70
   2  -6   6   50.11   14.74
  -2   6   6   26.26   12.68
  -2  -6   6   19.36   12.97
  -2   6   7   13.29   12.31
   2  -6   7   -0.68   10.58
  -2  -6   7   33.22   15.28
   2   6   7   12.65   11.54
  -2  -6   8   25.26   15.96
   2   6   8   28.49   14.46
  -2   6   8   34.48   16.02
   2  -6   8   40.42   16.95
   2   6   9   41.84   20.62
   2  -6   9   45.24   18.89
  -2   6   9   54.06   20.04
  -2  -6   9   10.25   17.46
  -2   7   0 2366.79  107.70
   2   7   0 2444.57  107.67
  -2   7   0 2512.84  103.51
  -2   7   1  762.23   35.18
   2  -7   1  739.40   34.50
  -2   7   1  799.69   42.64
  -2  -7   1  745.64   36.90
   2   7   1  768.99   41.60
   2  -7   2   85.44   14.72
  -2   7   2  105.45    7.75
  -2  -7   2  122.49   15.89
  -2  -7   2  117.01   11.31
  -2  -7   2   99.31   14.35
  -2   7   2  101.29   15.42
   2  -7   2  103.90    8.42
   2  -7   2  100.42   14.88
   2   7   2  100.49   14.59
   2  -7   3  713.31   41.85
  -2  -7   3  667.94   40.83
  -2   7   3  682.70   40.97
   2   7   3  755.86   41.37
  -2   7   3  690.44   32.51
   2  -7   4 1849.47   86.01
   2   7   4 1665.04   84.22
  -2   7   4 1823.02   85.68
  -2   7   4 1875.71   76.91
  -2  -7   4 1541.97   83.52
  -2   7   5  120.00   19.78
   2  -7   5  156.72   21.57
  -2  -7   5  136.65   21.11
   2   7   5  131.48   19.93
  -2  -7   6   85.23   19.12
   2   7   6   87.78   18.90
   2  -7   6   60.96   15.87
  -2   7   6   65.25   17.30
  -2  -7   7   26.79   15.88
  -2   7   7   21.85   12.45
   2   7   7    7.99   12.06
   2  -7   7   31.84   14.60
   2  -7   8   42.23   17.87
  -2   7   8   29.52   15.39
   2   7   8   43.23   16.77
  -2  -7   8   25.94   17.01
  -2  -7   9   62.17   23.49
   2   7   9   58.81   21.23
   2  -7   9   58.02   21.05
  -2   7   9   24.58   17.98
   2   8   0  712.52   42.34
  -2   8   0  789.78   37.41
  -2   8   0  767.37   43.55
   2   8   1  523.14   33.30
   2   8  -1  525.79   33.44
   2  -8   1  506.25   26.34
  -2   8   1  495.98   33.45
  -2   8   1  548.61   26.29
  -2  -8   1  515.52   28.44
  -2   8  -1  512.14   33.67
  -2   8   2  346.02   16.88
   2  -8   2  368.37   26.64
  -2  -8   2  313.66   24.87
  -2  -8   2  365.11   21.43
  -2   8   2  304.91   25.57
   2  -8   2  292.14   26.67
   2  -8   2  321.51   18.00
   2   8   2  330.45   25.58
  -2  -8   2  372.80   27.30
   2  -8   3  450.94   32.00
  -2   8   3  397.07   30.54
  -2   8   3  412.74   21.13
  -2  -8   3  471.80   32.13
   2   8   3  470.82   31.77
  -2   8   4  216.83   14.20
   2   8   4  212.81   23.41
  -2  -8   4  248.94   25.53
   2  -8   4  211.63   24.71
  -2   8   4  212.85   23.96
  -2  -8   5   42.58   14.89
   2   8   5   69.33   16.47
  -2   8   5   52.95   15.33
   2  -8   5   79.68   17.30
   2   8   6   95.48   20.08
   2  -8   6   79.59   18.91
  -2   8   6   72.05   18.03
  -2  -8   6   37.67   15.68
   2   8   7   -4.57   11.05
   2  -8   7    8.05   12.92
  -2   8   7   16.15   13.67
  -2  -8   7    6.75   13.81
   2  -8   8   21.98   15.48
  -2  -8   8   64.11   21.65
   2   8   8   47.88   17.29
  -2   8   8   14.98   15.72
  -2  -8   9   16.93   18.11
  -2   8   9   -1.09   15.63
   2   8   9    4.49   15.53
   2  -8   9   34.44   17.49
  -2  -9   0 2951.87  123.17
   2   9   0 2842.77  129.88
  -2   9   0 2806.55  130.10
  -2   9   0 3082.31  124.34
  -2   9   1  171.09   12.13
  -2   9   1  137.95   19.28
  -2   9  -1  147.84   19.44
  -2  -9   1  149.60   14.85
   2   9  -1  140.93   18.99
   2   9   1  168.15   20.02
   2  -9   1  171.00   13.38
   2  -9   2  100.78    9.57
   2  -9   2   84.07   15.38
   2  -9   2   58.80   13.91
  -2  -9   2  110.33   12.48
  -2   9   2  100.46    7.21
  -2  -9   2  119.99   18.10
  -2   9   2   60.07   13.64
   2   9   2   92.84   16.03
  -2  -9   2   97.84   16.45
   2   9   3  316.00   28.57
  -2  -9   3  313.87   28.42
  -2  -9   3  351.58   29.00
   2  -9   3  339.50   30.42
  -2   9   3  279.04   27.97
   2  -9   3  369.20   28.85
  -2   9   3  345.88   16.85
   2  -9   4  284.30   28.41
  -2   9   4  201.76   25.41
  -2  -9   4  301.62   28.45
   2   9   4  224.22   25.42
  -2   9   5   45.95   16.48
   2  -9   5   20.09   13.49
  -2  -9   5   42.82   15.53
   2   9   5   24.50   14.59
  -2  -9   6  107.41   21.76
   2  -9   6  104.42   22.33
   2   9   6  142.47   24.32
  -2   9   6  157.94   25.81
   2  -9   7   22.46   15.83
  -2   9   7    6.72   12.68
   2   9   7   16.18   15.29
  -2  -9   7   23.39   16.55
   2  -9   8   27.59   18.30
  -2   9   8  120.13   25.80
  -2  -9   8   55.67   21.87
   2   9   8  120.79   24.65
  -2  -9   9  -12.04   18.38
   2  -9   9    9.12   18.78
   2   9   9   29.13   20.01
  -2   9   9  -11.79   14.41
   2 -10   0  946.50   47.02
  -2  10   0  969.09   55.09
  -2  10   0  981.11   47.08
  -2 -10   0  957.59   48.84
   2  10   0 1040.59   55.46
  -2  10   1  811.45   49.83
  -2 -10  -1  780.29   44.40
  -2  10   1  894.61   40.26
   2  10  -1  796.05   49.01
   2 -10   1  818.36   40.89
  -2 -10   1  884.67   43.73
  -2  10  -1  882.22   50.64
   2  10   1  896.56   50.39
   2 -10   2  399.58   31.77
  -2 -10   2  416.83   31.56
  -2 -10   2  393.47   32.15
   2 -10   2  434.92   23.00
   2 -10   2  430.75   33.85
  -2  10   2  402.39   19.23
   2  10   2  369.65   30.36
  -2 -10   2  389.13   25.20
  -2 -10   3  396.89   31.24
  -2 -10   3  341.59   21.44
   2  10   3  269.30   27.70
  -2  10   3  270.14   28.59
   2 -10   3  303.58   30.39
  -2 -10   3  292.50   28.78
   2 -10   3  353.22   31.18
  -2 -10   4   85.48   19.07
   2  10   4   79.53   17.93
   2 -10   4  129.56   22.07
  -2  10   4   72.30   17.72
   2 -10   5    7.49   12.55
  -2  10   5    6.11   11.34
  -2 -10   5   12.87   12.65
   2  10   5   23.42   13.57
  -2  10   6   40.75   17.38
  -2 -10   6   49.45   17.55
   2 -10   6    5.59   13.19
   2  10   6   32.13   15.13
  -2 -10   7   35.07   17.50
  -2  10   7   31.42   17.25
   2 -10   7   14.58   16.28
   2  10   7    2.21   12.54
   2  10   8   12.55   14.76
  -2 -10   8   49.77   21.09
  -2  10   8   39.88   18.28
   2 -10   8   16.70   18.38
  -2  10   9   20.38   18.82
   2 -10   9   40.29   22.35
  -2 -10   9   -6.01   15.44
   2  10   9   22.94   20.96
   2  11   0 1644.02   85.41
   2 -11   0 1749.59   77.21
  -2 -11   0 1725.48   79.15
  -2  11   0 1771.04   77.64
  -2  11   0 1667.64   86.14
   2 -11   1  457.33   26.81
  -2 -11   1  491.77   29.40
  -2  11   1  389.91   33.10
  -2  11   1  483.40   24.90
   2  11   1  496.28   35.76
  -2  11  -1  414.46   34.35
  -2 -11  -1  423.64   29.27
   2  11  -1  453.63   34.90
  -2 -11   2   -0.71    6.12
  -2  11   2   -1.43    9.22
   2  11   2   13.50   10.08
   2  11  -2    8.96   10.18
  -2  11  -2  -11.65    7.35
   2 -11   2    3.35    5.75
  -2 -11   3  273.09   29.83
   2 -11   3  305.96   31.00
  -2  11   3  328.09   31.45
  -2 -11   3  313.00   21.12
   2 -11   3  286.32   31.13
   2  11   3  245.02   28.36
  -2 -11   3  313.74   31.39
   2 -11   4  856.35   55.60
  -2 -11   4  926.79   56.49
   2  11   4  777.22   53.01
   2 -11   4  922.89   54.53
  -2 -11   4  834.80   52.50
  -2  11   4  757.79   52.95
  -2 -11   5  134.44   24.46
  -2  11   5  116.92   23.39
   2 -11   5  125.55   23.47
   2  11   5   92.10   21.12
   2  11   6   59.68   20.21
   2 -11   6   68.09   20.74
  -2 -11   6   38.95   17.35
  -2  11   6   81.57   21.22
  -2  11   7   18.78   15.84
  -2 -11   7   23.00   17.35
   2 -11   7   10.82   14.82
   2  11   7   55.54   19.05
   2  11   8   71.84   24.19
  -2 -11   8   49.19   22.56
   2 -11   8   64.80   23.81
  -2  11   8   92.82   25.34
  -2  12   0  134.46   22.47
   2 -12   0  149.10   16.56
   2  12   0  114.82   20.55
  -2 -12   0  150.61   17.99
  -2  12   0  147.57   14.40
  -2 -12   1   83.65   13.62
  -2  12  -1   62.84   16.99
  -2 -12  -1   64.95   13.49
   2  12   1   94.40   19.27
   2  12  -1   68.19   17.24
   2 -12   1   82.48   12.37
  -2  12   1   67.28   16.83
  -2  12   2  183.80   25.79
  -2  12  -2  174.53   26.55
  -2 -12   2  267.94   20.49
   2  12   2  222.38   27.36
   2  12  -2  290.57   30.50
  -2  12   3  193.98   26.95
   2 -12   3  147.56   24.52
  -2 -12   3  175.10   25.75
   2 -12   3  169.81   26.80
  -2 -12   3  160.81   25.85
   2  12   3  134.43   23.80
  -2 -12   4  113.97   22.29
   2  12   4   96.44   21.07
   2 -12   4  102.15   22.52
   2 -12   4  106.85   23.44
  -2 -12   4  135.03   23.91
  -2  12   4  152.71   25.80
   2  12   5  135.15   25.89
   2 -12   5  164.30   27.27
  -2 -12   5  154.03   26.56
   2 -12   5  203.12   30.17
  -2  12   5  187.24   29.51
  -2 -12   5  188.96   29.31
   2  12   6    5.24   14.24
   2 -12   6    1.11   13.34
  -2 -12   6   31.36   18.35
  -2  12   6   -8.96   12.05
  -2 -12   7   16.44   18.92
   2 -12   7   55.70   22.21
  -2  12   7   -9.90   15.29
   2  12   7   13.37   15.31
   2  12   8   11.28   17.27
  -2  12   8   15.90   18.63
  -2 -12   8   30.77   21.63
   2 -12   8   37.90   23.52
  -2 -13   0 1190.73   59.87
   2  13   0 1132.94   66.29
   2 -13   0 1114.95   56.92
  -2  13   0 1158.42   67.43
   2  13   1  326.83   33.32
  -2 -13  -1  296.39   26.92
   2 -13   1  345.15   23.85
  -2 -13   1  331.35   25.13
  -2  13  -1  328.74   34.41
  -2  13  -1  350.79   24.46
   2  13  -1  290.97   32.48
  -2  13   1  307.99   33.22
   2  13  -2   10.06   11.78
  -2  13   2   13.04   13.15
   2  13   2   -1.69   11.25
  -2  13  -2    5.64   11.50
  -2  13  -3  346.10   35.33
   2  13   3  329.71   33.98
   2  13  -3  321.46   33.80
  -2  13   3  294.33   33.62
  -2 -13   4  450.31   42.07
   2 -13   4  565.70   43.39
   2  13   4  456.04   42.25
  -2  13   4  473.08   43.10
  -2 -13   4  424.74   41.77
   2 -13   4  428.29   42.57
  -2 -13   5    0.94   14.28
   2 -13   5    4.38   13.76
   2  13   5   20.70   15.05
   2 -13   5   11.69   15.51
  -2  13   5   -0.55   12.59
  -2 -13   5   -8.62   12.12
  -2 -13   6   28.34   19.88
   2 -13   6   22.59   17.17
  -2 -13   6   91.91   23.77
   2 -13   6   72.20   23.01
  -2  13   6   26.60   19.27
   2  13   6   51.70   20.15
   2 -13   7    6.78   18.19
  -2 -13   7   27.05   18.35
  -2  13   7   25.09   19.23
   2  13   7   13.40   18.35
   2 -13   8   74.61   26.76
  -2 -13   8   70.22   25.34
  -2 -14   0  539.86   38.46
   2 -14   0  673.37   38.90
   2  14   0  690.61   47.83
  -2  14   0  672.81   47.82
   2 -14  -1  326.24   26.73
  -2 -14   1  376.21   27.51
  -2  14  -1  313.03   35.48
   2  14  -1  356.00   36.81
   2  14   1  354.36   36.13
  -2  14   1  308.85   35.27
  -2  14  -2  293.59   34.01
   2  14  -2  362.67   36.30
  -2 -14  -2  313.17   28.83
  -2  14   2  287.23   34.23
   2  14   2  230.49   31.37
   2  14   3  135.69   24.16
  -2  14   3  104.27   23.73
   2  14  -3  141.38   25.96
  -2  14  -3  114.37   23.78
  -2  14   4   15.67   13.49
  -2 -14   4   25.09   16.70
  -2 -14   4    8.59   14.09
   2  14   4   39.98   16.24
   2 -14   4    9.47   15.89
   2 -14   4   34.57   17.52
  -2  14   5   13.28   15.73
   2  14   5    9.85   15.08
   2 -14   5    3.17   15.02
   2 -14   5   17.18   16.33
  -2 -14   5    5.43   15.29
  -2 -14   5   28.44   15.47
  -2 -14   6   16.38   17.23
   2  14   6   28.30   19.67
  -2 -14   6   -1.07   16.46
  -2  14   6   30.76   18.36
   2 -14   6   20.86   17.82
   2 -14   6   15.46   17.82
  -2 -14   7    9.96   19.11
  -2  14   7    8.43   19.78
  -2 -14   7   -7.27   16.59
   2  14   7    9.89   19.30
   2 -14   7  -18.44   14.34
   2 -14   7    9.81   18.81
   2  15   0  848.76   58.06
  -2  15   0  861.73   58.78
  -2  15   1  310.27   36.09
  -2  15  -1  221.94   32.64
   2 -15  -1  301.61   26.63
   2  15   1  294.73   34.72
   2  15  -1  232.46   32.77
   2  15  -2   16.48   14.72
   2  15   2   14.50   14.60
  -2  15   2   37.80   16.78
  -2 -15  -2   11.57   11.33
  -2  15  -2   -4.02   12.83
   2  15   3  154.83   27.42
   2  15  -3  118.34   25.41
  -2  15  -3  224.01   31.92
  -2  15   3  169.99   28.53
   2  15   4  352.45   39.72
  -2  15   4  342.46   39.90
  -2  15  -4  336.40   38.32
   2  15  -4  312.50   37.43
  -2  15   5   15.21   16.35
   2 -15   5   42.27   19.88
   2 -15   5   53.62   20.44
  -2 -15   5   55.66   20.80
  -2 -15   5   44.57   19.02
   2  15   5   60.14   20.24
  -2  15   6  123.71   28.72
  -2 -15   6   63.52   22.42
  -2 -15   6   52.92   23.67
   2  15   6  104.21   26.38
   2 -15   6   67.11   24.12
   2 -15   6   58.22   24.17
   2 -15   7    7.97   19.92
  -2 -15   7   27.00   21.55
  -2  16   0  199.10   31.99
   2  16   0  234.72   33.17
   2  16   1   57.40   20.00
   2 -16  -1   71.45   16.83
  -2 -16  -1   69.26   16.64
  -2  16  -1   62.07   20.98
   2  16  -1   90.92   22.04
  -2  16   1   56.06   19.83
   2  16   2  178.33   29.66
   2  16  -2  208.17   31.98
  -2 -16  -2  174.90   25.15
  -2  16  -2  177.14   30.00
  -2  16   2  130.18   25.94
  -2 -16  -3  177.38   26.05
  -2  16   3  189.95   31.46
   2  16   3  201.83   31.50
  -2  16  -3  207.29   32.79
   2  16  -3  208.23   32.73
  -2  16   4   57.42   19.90
   2  16  -4   76.67   21.70
   2  16   4   53.68   18.90
  -2  16  -4   40.37   18.43
  -2  16   5   36.65   19.63
   2  16   5   32.15   19.87
   2  16   6   36.36   20.81
   2 -16   6    9.51   20.56
  -2 -16   6   23.22   20.29
  -2  16   6   14.84   20.22
  -2 -16   6   25.09   18.88
   2 -16   6   47.88   21.86
  -2  17   0  484.52   46.30
   2  17   0  368.65   42.59
  -2  17   1  260.88   36.49
  -2 -17  -1  253.88   28.81
   2  17   1  211.92   33.25
  -2  17  -1  264.94   36.93
   2  17  -1  290.35   37.31
  -2 -17  -2   21.72   12.50
  -2  17   2  -10.67   13.92
  -2  17  -2   30.73   17.18
   2 -17  -2   20.02   10.80
   2  17   2   15.63   14.37
   2  17  -2   23.59   17.46
   2  17  -3  112.15   26.42
   2  17   3   84.04   22.85
  -2  17  -3   91.82   24.19
  -2 -17  -3   88.50   19.75
  -2  17   3   74.83   21.96
   2  17   4  381.38   44.86
   2  17  -4  372.75   43.64
  -2  17   4  499.36   49.45
  -2 -17  -4  356.79   37.35
  -2  17  -4  380.92   44.42
   2  17  -5   18.87   17.71
  -2  17  -5   12.10   16.67
   2  17   5   26.82   21.04
  -2  17   5   15.87   20.24
  -2  18   0  423.56   47.81
   2  18   0  423.84   47.10
  -2  18  -1  212.34   34.40
   2  18  -1  201.23   32.45
   2  18   1  200.55   32.35
  -2  18   1  122.69   27.91
  -2  18   2  137.06   28.09
   2  18   2  139.26   28.15
  -2 -18  -2  101.02   22.01
  -2  18  -2   96.55   24.91
   2  18  -2  115.29   26.62
   2 -18  -3  196.00   27.69
   2  18   3  200.89   34.15
  -2  18   3  148.75   31.83
  -2 -18  -3  175.53   27.72
   2  18  -3  128.34   29.98
  -2  18  -3  152.27   30.89
  -2 -18  -4   95.16   21.95
  -2  18   4  104.47   27.18
  -2  18  -4   40.01   21.34
   2  18   4   65.06   23.75
   2  18  -4   58.85   22.46
   2  19   0  905.28   67.84
  -2  19   0  831.62   65.37
   2  19  -1   90.10   27.07
   2  19   1   73.50   24.01
  -2  19   1  175.65   31.00
  -2  19  -1  102.86   27.35
   2  19   2    1.50   18.66
  -2  19  -2  -18.88   15.53
  -2  19   2   -2.25   15.35
   2  19  -2   17.79   17.52
  -2 -19  -3  125.30   24.62
   2  19   3  140.84   31.01
   2  19  -3  125.98   30.34
  -2  19   3  140.42   32.03
  -2  19  -3   77.26   26.57
  -2  20   0  199.14   37.01
   2  20   0  126.82   32.44
   2  20  -1  181.24   34.45
   2  20   1  200.06   36.48
  -2  20   1  174.29   34.63
  -2  20  -1  225.50   37.84
  -3   0   0   -3.41    1.75
  -3   0   0   -3.45    1.79
  -3   0   1    1.67    3.12
   3   0   1   -5.99    2.55
  -3   0   1   -0.50    2.09
  -3   0   2    4.80    5.20
   3   0   2    4.95    5.37
  -3   0   2    1.09    4.53
  -3   0   3   27.00    7.46
   3   0   3   33.04    7.79
  -3   0   3   36.77    8.29
  -3   0   4  836.49   45.37
  -3   0   4  878.74   45.69
   3   0   4  894.24   45.53
   3   0   5 1252.10   64.18
  -3   0   5 1303.74   65.03
  -3   0   5 1293.24   65.10
   3   0   6 1194.05   66.16
  -3   0   6 1359.66   68.29
  -3   0   7   -5.68    9.94
   3   0   7    8.70   10.67
  -3   0   8  517.43   41.93
   3   0   8  508.34   41.00
   3   0   8  510.01   40.99
   3   0   9  359.08   40.69
  -3   0   9  500.26   45.26
   3   0  10  127.27   27.68
  -3   0  10  113.37   27.37
  -3   1   0   -1.15    1.00
  -3   1   0    0.42    2.35
  -3  -1   0   -0.16    0.65
  -3  -1   0    0.17    2.17
   3   1   0    1.62    1.76
  -3  -1   1   78.26    7.39
   3  -1   1   85.60    7.11
   3   1   1   90.33    7.02
  -3   1   1   77.25    6.82
  -3   1   1   77.79    6.96
   3   1   2   24.00    6.42
  -3  -1   2   23.26    6.40
  -3  -1   2   28.86    6.88
  -3   1   2   25.08    6.07
  -3   1   2   24.66    6.73
   3  -1   2   29.06    6.47
  -3  -1   3 1425.20   64.48
  -3  -1   3 1351.41   65.24
  -3   1   3 1432.28   64.81
   3  -1   3 1445.23   64.64
   3   1   3 1445.52   64.53
  -3   1   3 1426.94   64.73
   3   1   4  238.34   19.78
   3  -1   4  182.63   18.18
  -3   1   4  192.07   18.62
  -3  -1   4  242.58   18.93
  -3  -1   4  208.84   19.01
  -3   1   4  222.22   18.01
  -3  -1   5   53.87   12.89
   3   1   5   85.29   14.59
   3  -1   5   89.69   14.77
  -3   1   5   88.35   15.10
  -3   1   5   74.98   13.08
  -3  -1   6  415.63   30.84
   3   1   6  275.34   27.57
  -3   1   6  358.30   29.51
   3  -1   6  380.51   29.69
   3  -1   7 1306.71   73.02
   3   1   7 1336.33   72.88
  -3   1   7 1354.92   73.42
  -3  -1   7 1351.17   73.65
  -3   1   8   54.88   17.64
   3   1   8   53.89   16.30
   3  -1   8   30.82   15.25
  -3  -1   8   33.01   16.04
  -3  -1   9   66.38   20.62
  -3   1   9  107.31   24.59
   3  -1   9   83.42   21.59
   3   1   9  139.62   25.78
   3   1  10   54.44   21.20
   3  -1  10   58.38   21.23
  -3  -1  10   53.10   21.39
  -3   1  10   10.95   20.17
  -3  -2   0   -1.74    3.13
  -3   2   0   -1.50    3.46
   3   2   0    1.59    3.28
  -3   2   0   -2.56    3.01
  -3  -2   0    0.63    2.51
   3   2   1  101.62    8.10
  -3   2   1   92.32    8.21
  -3  -2  -1   88.25    6.43
  -3   2   1   90.06    7.65
  -3  -2   1   82.73    7.43
   3  -2   1  100.45    8.74
  -3  -2   1   83.90    7.75
  -3  -2   1   96.18    8.21
   3   2   2   18.50    6.05
  -3   2   2   19.81    5.57
   3  -2   2   17.89    6.38
  -3   2   2   36.60    7.07
  -3  -2   2   17.07    6.15
  -3  -2   2   23.59    6.70
   3  -2   3  365.80   22.96
   3   2   3  370.01   22.56
  -3  -2   3  325.54   22.60
  -3  -2   3  353.62   22.45
  -3   2   3  363.88   21.80
  -3   2   3  352.67   22.94
  -3   2   4 1637.26   75.02
   3  -2   4 1621.09   75.88
  -3  -2   4 1722.97   76.76
  -3  -2   4 1622.79   77.29
  -3   2   4 1572.59   75.75
   3   2   4 1613.65   75.49
  -3   2   5 1010.38   51.38
  -3  -2   5  979.98   52.99
   3  -2   5  969.99   52.62
   3   2   5  987.79   52.56
  -3   2   5  914.44   51.94
  -3  -2   6  303.96   28.95
  -3   2   6  258.70   27.20
   3   2   6  329.89   28.73
   3  -2   6  321.51   28.82
   3  -2   7   12.05   11.74
  -3  -2   7   15.47   12.40
  -3   2   7    1.19   10.90
   3   2   7   -9.56    9.06
   3   2   8  189.24   27.28
  -3  -2   8  136.31   25.76
  -3   2   8  164.23   26.67
   3  -2   8  156.48   25.87
  -3   2   9  234.65   34.31
  -3  -2   9  258.14   35.22
   3  -2   9  232.35   33.85
   3   2   9  226.16   32.91
  -3   2  10  165.82   33.42
  -3  -2  10  164.88   30.65
   3   2  10  240.22   36.14
   3  -2  10  167.09   30.41
  -3   3   0   -0.64    5.00
  -3  -3   0   -3.75    2.61
  -3  -3   0   -0.18    4.03
   3   3   0    3.27    4.14
  -3   3   0   -4.16    3.64
  -3  -3  -1  875.99   35.94
  -3  -3   1  837.64   39.08
  -3   3   1  851.14   39.82
   3   3   1  860.10   39.13
  -3  -3   1  831.91   39.27
  -3   3   1  865.35   38.06
   3  -3   1  862.54   40.04
   3   3   2   27.07    6.85
  -3  -3   2   28.92    7.12
  -3   3   2   30.80    7.18
   3  -3   2   35.50    8.04
  -3   3   2   29.72    5.79
  -3  -3   2   53.14    8.46
  -3   3   3 3469.45  144.42
  -3  -3   3 3337.48  144.59
   3  -3   3 3631.79  145.87
  -3   3   3 3395.42  144.82
   3   3   3 3535.57  144.96
  -3  -3   3 3390.27  147.34
  -3  -3   4  271.19   21.59
   3   3   4  269.73   20.92
  -3   3   4  272.63   21.85
  -3   3   4  263.23   19.31
   3  -3   4  285.41   21.85
  -3   3   5   26.03    9.99
  -3  -3   5   51.30   12.08
   3   3   5   32.93   10.02
   3  -3   5   35.48   10.64
  -3   3   5   35.00    8.98
   3  -3   6  279.45   27.56
  -3   3   6  288.84   27.65
   3   3   6  299.66   27.92
  -3  -3   6  266.80   27.45
  -3   3   7 1166.16   70.52
   3  -3   7 1395.35   73.21
   3   3   7 1303.69   71.44
  -3  -3   7 1302.65   72.60
   3   3   8  122.04   23.77
  -3  -3   8  126.20   24.32
  -3   3   8  117.23   23.73
   3  -3   8  100.36   21.63
   3   3   9   39.95   16.40
   3  -3   9   80.04   21.99
  -3  -3   9   83.23   22.40
  -3   3   9   58.47   20.13
  -3  -3  10   52.27   20.05
  -3   3  10   67.01   24.22
   3   3  10   62.32   22.35
   3  -3  10   62.44   20.74
  -3   4   0    8.91    6.44
  -3  -4   0   -5.89    3.98
  -3   4   0   -2.73    4.10
  -3  -4   0   -0.52    2.91
   3   4   0    0.89    5.07
   3  -4   1 2911.71  120.03
  -3  -4   1 3012.18  124.55
   3  -4   1 2916.66  117.18
  -3   4   1 3001.74  124.90
   3  -4   1 2936.65  124.97
   3   4   1 3083.52  124.23
  -3   4   1 3118.29  123.32
  -3  -4   2  342.03   21.43
  -3  -4   2  376.16   22.61
  -3   4   2  371.98   22.70
   3   4   2  353.51   21.85
   3  -4   2  347.09   22.60
  -3   4   2  344.28   18.89
  -3   4   3   19.61    5.82
   3   4   3   18.17    7.58
  -3   4   3   12.25    7.57
   3  -4   3   26.62    8.54
  -3  -4   3   12.97    6.92
  -3  -4   3   29.26    8.48
   3  -4   4  908.23   46.47
  -3   4   4  922.73   43.15
   3   4   4  793.62   44.75
  -3   4   4  762.04   44.82
  -3  -4   4  803.22   45.16
  -3  -4   5  336.98   27.67
   3   4   5  340.04   27.46
   3  -4   5  437.47   30.57
  -3   4   5  419.66   26.12
  -3   4   5  424.32   30.11
   3  -4   6 1415.00   76.08
   3   4   6 1461.54   75.98
  -3   4   6 1447.81   76.51
  -3  -4   6 1554.22   77.43
  -3  -4   7    2.25   10.84
  -3   4   7   -0.73   10.80
   3   4   7   14.20   11.27
   3  -4   7    1.88   10.48
   3   4   8  424.18   39.55
  -3   4   8  388.75   38.83
   3  -4   8  415.48   39.68
  -3  -4   8  334.28   37.71
   3   4   9  346.30   38.48
  -3  -4   9  260.49   36.55
  -3   4   9  338.33   39.61
   3  -4   9  279.54   37.09
   3   4  10  109.62   26.34
   3  -4  10  111.37   26.79
  -3   4  10   72.43   24.84
  -3  -4  10   87.51   26.27
  -3   5   0    2.03    4.36
  -3  -5   0    1.55    4.71
   3   5   0    4.02    6.00
  -3   5   0    0.14    6.37
   3  -5   1  698.15   29.66
   3   5   1  698.05   35.71
   3  -5   1  717.96   37.31
  -3   5   1  745.74   37.33
  -3  -5   1  676.48   36.15
   3  -5   1  693.37   35.32
  -3  -5   1  669.09   34.68
  -3  -5   1  674.07   33.31
  -3   5   1  718.32   32.79
  -3   5   2  386.18   20.16
   3   5   2  401.44   24.54
   3  -5   2  414.50   25.70
  -3   5   2  367.69   24.25
  -3  -5   2  366.81   24.37
  -3  -5   2  395.23   21.94
   3  -5   3 1578.92   70.68
  -3  -5   3 1500.74   69.56
  -3   5   3 1465.63   64.89
   3   5   3 1448.88   69.06
  -3   5   3 1403.32   69.33
  -3  -5   4  201.48   20.58
   3   5   4  245.80   21.49
  -3   5   4  216.25   16.11
  -3   5   4  225.28   21.69
   3  -5   4  205.36   20.87
  -3  -5   5  219.89   22.91
   3   5   5  152.86   20.30
  -3   5   5  166.36   21.23
   3  -5   5  153.65   20.66
  -3   5   5  165.65   15.95
   3   5   6   22.06   11.61
  -3   5   6   20.71   11.70
   3  -5   6    5.46    9.59
  -3  -5   6   18.72   11.30
  -3  -5   7 1449.69   76.62
  -3   5   7 1233.00   73.86
   3   5   7 1293.21   73.87
   3  -5   7 1383.76   75.64
  -3   5   8   20.94   15.57
   3   5   8   72.20   19.50
  -3  -5   8   13.30   14.40
   3  -5   8   39.16   16.22
  -3  -5   9   19.79   18.79
   3   5   9   65.28   20.77
  -3   5   9   70.79   21.73
   3  -5   9   73.98   21.45
  -3  -5  10   78.55   25.63
   3   5  10   34.54   20.73
  -3   5  10   61.30   23.52
   3  -5  10   58.77   24.64
   3   6   0   -2.22    5.16
  -3   6   0    3.32    7.03
  -3   6   0    3.08    4.41
  -3  -6   0   -3.48    3.83
  -3  -6   1  964.35   43.23
  -3   6   1  840.52   46.09
   3  -6   1  919.27   39.11
  -3  -6   1  920.40   44.86
   3  -6   1  934.06   45.74
   3  -6   1  928.99   47.40
   3   6   1  928.76   46.23
  -3   6   1  950.05   41.90
  -3  -6   1  879.25   46.25
  -3   6   2  215.45   19.37
  -3   6   2  218.03   13.25
  -3  -6   2  218.59   15.60
   3  -6   2  224.31   19.84
  -3  -6   2  219.62   19.31
   3   6   2  223.04   18.19
   3  -6   3   94.59   14.52
  -3   6   3   74.00   13.89
   3   6   3   87.30   13.77
  -3  -6   3  125.51   15.58
  -3   6   3  107.41    9.58
   3   6   4 1265.85   63.10
  -3  -6   4 1277.67   63.48
  -3   6   4 1235.69   63.41
   3  -6   4 1168.36   62.68
  -3   6   4 1228.01   56.94
  -3  -6   5  449.69   32.98
   3   6   5  442.20   32.04
   3  -6   5  431.02   32.54
  -3   6   5  434.38   26.53
  -3   6   5  422.51   32.87
   3   6   6  543.76   40.32
  -3   6   6  562.44   41.56
   3  -6   6  634.07   42.80
  -3  -6   6  637.72   43.14
  -3  -6   7   -1.89   11.51
   3  -6   7   -0.54   11.26
  -3   6   7  -11.98   10.23
   3   6   7   11.01   11.73
   3  -6   8  202.63   30.85
  -3  -6   8  196.58   31.17
   3   6   8  223.55   30.83
  -3   6   8  207.96   31.24
   3   6   9  255.30   36.20
  -3   6   9  345.12   41.41
  -3  -6   9  347.96   41.41
   3  -6   9  276.67   38.09
  -3   7   0   -3.48    4.33
  -3  -7   0   -5.06    3.13
   3   7   0   17.13    7.71
  -3   7   0   -5.90    6.34
  -3   7  -1   52.50   11.36
  -3   7   1   41.92   11.07
  -3  -7   1   36.60    7.94
   3  -7   1   48.19    6.32
   3   7   1   45.10   10.50
  -3   7   1   45.91    6.86
  -3   7   2  117.24    9.25
   3   7   2  141.21   16.02
  -3  -7   2  143.89   12.82
   3  -7   2  114.87    8.02
  -3   7   2  121.66   15.98
  -3  -7   2  112.59   15.56
   3  -7   2   98.48   14.81
   3  -7   2  101.51   15.21
  -3  -7   2  121.84   15.46
   3  -7   3 2493.77  113.52
   3   7   3 2490.75  111.93
  -3   7   3 2478.12  112.89
  -3  -7   3 2594.41  113.30
  -3   7   3 2478.02  104.71
  -3  -7   4  118.48   18.43
   3  -7   4  119.42   18.34
   3   7   4  129.18   18.28
  -3   7   4  137.74   12.19
  -3   7   4  150.15   19.54
  -3   7   5   80.04   10.96
  -3   7   5  113.89   19.90
   3   7   5   72.17   15.95
  -3  -7   5   86.96   17.09
   3  -7   5   80.13   16.84
  -3   7   6  140.88   23.99
   3   7   6  163.05   24.35
   3  -7   6  158.95   23.83
  -3  -7   6  182.44   25.40
  -3  -7   7  821.46   55.00
  -3   7   7  848.21   55.60
   3  -7   7  789.40   54.13
   3   7   7  784.15   53.67
   3  -7   8  163.14   28.19
   3   7   8  127.33   25.31
  -3   7   8  119.05   26.04
  -3  -7   8  153.89   27.52
  -3   7   9  100.25   26.87
  -3  -7   9  110.93   27.68
   3   7   9  132.63   28.09
   3  -7   9  149.38   29.08
  -3  -8   0   -2.56    2.17
  -3   8   0   -4.19    4.12
  -3   8   0    0.54    6.65
   3   8   0    1.05    6.41
   3   8   1  680.81   38.08
   3   8  -1  621.94   37.36
   3  -8   1  609.03   29.61
  -3   8  -1  621.79   38.13
  -3   8   1  602.50   38.03
  -3  -8   1  622.81   33.03
  -3   8   1  604.43   30.69
   3  -8   2   16.28    8.64
  -3   8   2   29.10   10.31
  -3  -8   2    5.18    8.16
   3  -8   2   18.39    4.62
   3   8   2   20.83    8.64
  -3  -8   2    8.19    6.46
  -3   8   2   22.41    4.63
   3  -8   2   25.76    9.86
  -3  -8   2   17.50    9.07
  -3  -8   3   -7.58    6.91
   3  -8   3    7.14    8.46
  -3   8   3   -1.23    6.63
   3   8   3   14.24    9.13
  -3   8   3   11.11    4.00
  -3   8   4  630.43   41.90
  -3   8   4  654.01   32.27
   3  -8   4  622.18   42.12
   3   8   4  692.35   42.15
  -3  -8   4  624.82   41.58
  -3  -8   5  398.75   32.70
   3   8   5  353.99   32.73
   3  -8   5  384.04   33.74
  -3   8   5  396.65   34.48
  -3   8   6  454.39   39.55
   3  -8   6  421.34   37.92
   3   8   6  459.60   37.20
  -3  -8   6  434.14   38.35
  -3   8   7    2.06   12.55
  -3  -8   7    8.04   12.80
   3  -8   7   10.37   12.91
   3   8   7   -2.30   11.17
   3   8   8  131.08   25.68
   3  -8   8  121.70   26.52
  -3   8   8  108.05   25.08
  -3  -8   8  151.53   27.83
   3  -8   9  381.62   45.48
  -3   8   9  345.75   44.36
   3   8   9  423.38   46.29
  -3  -8   9  443.57   46.81
  -3   9   0    0.98    4.70
  -3   9   0    9.89    8.59
   3   9   0    8.21    7.59
  -3  -9   0   -3.45    2.77
   3   9   1  127.22   17.74
   3  -9   1  146.35   11.95
  -3   9   1  154.26   11.76
  -3   9  -1  100.97   17.23
  -3  -9  -1  108.74   14.86
   3   9  -1  100.61   16.42
  -3  -9   1  120.79   13.93
  -3   9   1   83.34   16.03
  -3  -9   2   55.25   13.16
  -3   9   2   46.20   12.46
  -3   9   2   42.42    5.45
   3  -9   2   30.06   10.11
   3  -9   2   45.06    6.73
  -3  -9   2   49.34    9.57
  -3  -9   2   38.53   11.55
   3  -9   2   39.40   11.65
   3   9   2   20.50    9.64
  -3  -9   3  600.85   41.06
   3   9   3  649.61   41.23
  -3   9   3  653.32   29.97
  -3  -9   3  654.63   40.66
  -3  -9   3  662.80   34.37
   3  -9   3  594.63   41.60
  -3   9   3  623.35   41.37
   3  -9   3  660.96   41.06
  -3   9   4   87.23   17.86
  -3  -9   4   73.23   16.47
   3  -9   4   38.78   13.91
   3   9   4  104.75   18.71
   3  -9   5   21.92   13.15
   3   9   5   19.09   13.99
  -3  -9   5   29.40   13.96
  -3   9   5   26.60   16.41
  -3   9   6  101.48   22.59
   3   9   6  122.55   24.11
   3  -9   6  158.53   25.43
  -3  -9   6  151.50   24.76
   3  -9   7 1064.62   66.21
  -3  -9   7  984.51   65.37
  -3   9   7 1072.88   67.26
   3   9   7  959.05   64.57
  -3   9   8   93.84   23.25
  -3  -9   8   68.97   22.29
   3   9   8   53.60   19.20
   3  -9   8   56.44   19.86
   3   9   9   57.58   21.43
  -3   9   9   85.76   25.35
   3  -9   9   55.07   22.49
  -3  -9   9   88.91   26.39
  -3 -10   0    2.24    3.79
  -3  10   0    5.32    5.55
  -3  10   0    7.34    8.54
   3  10   0   -2.34    7.40
   3  10   1  343.56   26.92
   3 -10   1  299.34   19.04
  -3  10   1  281.77   18.04
  -3 -10   1  294.44   21.68
  -3 -10  -1  260.77   21.66
   3  10  -1  346.57   27.04
  -3  10  -1  273.84   27.27
  -3  10   1  235.96   26.33
   3 -10   2   14.70    5.67
   3 -10   2   22.60   11.02
  -3  10   2    1.34    7.74
  -3  10   2   13.81    3.97
   3 -10   2    6.13    8.87
  -3 -10   2   16.98   10.82
  -3 -10   2    6.41    9.33
   3  10   2   14.07   10.18
  -3 -10   2   19.08    7.96
  -3 -10   3   27.62   12.64
   3 -10   3    4.43    9.26
  -3  10   3   -0.11    9.55
   3  10   3    3.96    9.02
   3 -10   3    5.10    8.87
  -3 -10   3   23.35   12.31
  -3 -10   3   21.71    7.61
  -3 -10   4  321.10   31.15
  -3  10   4  287.47   30.61
   3 -10   4  236.61   29.08
   3  10   4  288.70   29.48
  -3 -10   5  576.62   42.88
  -3  10   5  597.61   43.81
   3  10   5  546.73   41.80
   3 -10   5  520.82   41.95
   3 -10   6  603.42   46.08
  -3  10   6  615.30   46.94
  -3 -10   6  555.83   45.13
   3  10   6  552.18   44.48
  -3  10   7  -14.19   12.82
   3  10   7   10.69   14.47
   3 -10   7   -7.57   12.17
  -3 -10   7    1.67   14.02
  -3  10   8  362.62   42.25
   3  10   8  286.86   38.50
  -3 -10   8  298.61   39.67
   3 -10   8  339.47   42.04
   3 -10   9  184.74   34.35
   3  10   9  283.67   40.35
  -3 -10   9  171.28   33.43
  -3  10   9  144.37   31.93
   3  11   0    1.26    9.31
  -3 -11   0    3.72    6.65
  -3  11   0   -1.91    5.44
  -3  11   0    6.47    9.48
   3 -11   0   -4.97    5.55
  -3 -11  -1    3.94    6.90
  -3  11   1   23.74    6.41
   3  11  -1   25.48   12.10
  -3 -11   1   33.22    9.75
   3 -11   1   17.51    7.11
   3  11   1   26.10   12.13
  -3  11   1   34.71   12.92
  -3  11  -1   19.91   11.72
  -3  11   2    4.21   10.20
  -3 -11   2   10.84    7.93
  -3  11  -2    2.34    8.35
   3  11  -2    5.00    9.50
   3  11   2    5.98    9.15
   3 -11   2    2.38    6.00
   3 -11   3  723.47   48.27
  -3  11   3  726.07   48.65
  -3 -11   3  814.96   41.26
  -3 -11   3  856.64   50.16
   3  11   3  755.27   48.98
   3 -11   3  725.52   50.13
  -3 -11   3  780.21   50.60
   3  11   4  144.96   24.07
  -3 -11   4  188.37   26.19
   3 -11   4  159.30   25.54
   3 -11   4  108.99   21.31
  -3 -11   4  163.64   25.28
  -3  11   4  128.56   23.23
   3 -11   5   20.12   15.45
  -3 -11   5   34.87   15.66
  -3  11   5   56.39   17.83
   3  11   5   50.48   16.87
   3  11   6  194.72   29.37
  -3  11   6  176.53   28.76
  -3 -11   6  151.27   27.82
   3 -11   6  166.00   28.51
  -3  11   7  563.35   52.52
   3 -11   7  639.47   51.35
   3  11   7  595.58   49.53
  -3 -11   7  628.88   51.08
   3 -11   8   60.88   22.29
  -3  11   8   50.62   20.68
   3  11   8   84.80   24.17
  -3 -11   8   66.55   24.17
  -3 -12   0   -4.81    6.40
  -3  12   0    4.08   10.44
  -3  12   0    5.15    6.34
   3 -12   0    6.35    6.93
   3  12   0   -0.02    9.29
   3 -12   1  144.33   14.77
  -3  12  -1  170.11   17.19
   3  12  -1  158.88   23.64
   3  12   1  138.61   22.42
  -3 -12   1  128.03   16.90
  -3 -12  -1  184.43   20.47
  -3  12  -1  171.17   24.46
  -3  12   1  119.57   22.07
   3  12   2  118.68   21.65
   3  12  -2  155.29   24.22
  -3 -12   2  195.40   18.99
  -3  12   2  151.09   24.07
  -3  12  -2  180.55   25.83
   3  12   3   71.17   17.85
  -3 -12   3  108.91   21.33
   3 -12   3   62.16   18.63
   3 -12   3   78.05   19.94
  -3  12   3   84.10   19.95
  -3 -12   3   67.57   18.74
  -3  12   4  493.15   41.15
  -3 -12   4  423.43   40.82
   3 -12   4  588.39   44.51
  -3 -12   4  496.09   42.26
   3  12   4  491.87   39.95
   3 -12   4  494.42   42.73
   3  12   5  372.64   38.41
   3 -12   5  433.06   41.25
  -3 -12   5  394.16   39.40
  -3  12   5  485.57   43.25
  -3 -12   5  437.00   41.26
   3 -12   5  398.10   41.16
  -3  12   6  130.02   25.99
  -3 -12   6  101.95   24.17
   3 -12   6  139.44   27.33
   3  12   6  120.12   25.31
  -3 -12   7   40.50   20.38
   3 -12   7   25.76   19.02
  -3  12   7    5.59   16.30
   3  12   7   16.36   18.20
  -3  12   8   68.19   24.54
   3  12   8   69.54   24.13
  -3 -12   8   60.10   22.56
   3 -12   8   77.95   24.41
   3 -13   0   10.92    7.79
   3  13   0   18.95   12.54
  -3 -13   0   -1.35    7.95
  -3  13   0    3.89   11.21
   3  13   1   23.89   13.50
  -3  13  -1   19.43   12.87
  -3  13   1    7.60   11.61
  -3 -13  -1   22.23   10.88
   3  13  -1   30.94   14.19
  -3 -13   1   20.78    9.69
  -3  13  -1   49.04   10.79
  -3  13   2   -8.97    9.36
  -3 -13  -2   12.62    9.45
   3  13   2    6.89   10.95
   3  13  -2   -1.34   10.38
  -3  13  -2   22.52   13.59
  -3 -13   2   24.15    8.88
   3  13  -3  540.57   42.55
   3  13   3  656.62   44.95
  -3  13  -3  519.51   42.63
  -3  13   3  548.53   42.87
   3  13   4  173.64   27.75
   3 -13   4  193.94   30.31
  -3  13   4  175.13   28.84
  -3 -13   4  239.36   31.52
   3 -13   4  108.60   22.86
  -3 -13   4  205.67   30.27
  -3 -13   5   36.97   18.29
   3 -13   5   40.15   17.80
  -3  13   5   56.01   19.24
  -3 -13   5   44.45   17.68
   3  13   5   57.62   18.66
   3 -13   5   47.45   19.56
  -3 -13   6  118.29   26.58
   3  13   6  162.57   29.30
   3 -13   6  122.61   26.84
  -3 -13   6  175.54   30.66
  -3  13   6  125.94   28.61
   3 -13   6  130.71   27.93
  -3 -13   7  596.67   54.84
   3 -13   7  546.42   52.48
  -3  13   7  559.03   53.95
   3  13   7  558.69   53.82
   3 -13   7  527.19   53.03
   3  14   0   -7.29   11.17
   3 -14   0   -1.79    7.66
  -3 -14   0    7.91   10.16
  -3  14   0    4.36   11.11
  -3 -14   1  261.14   24.41
  -3  14  -1  204.51   29.70
  -3  14   1  185.97   28.64
  -3 -14  -1  254.79   25.37
   3 -14  -1  179.95   21.40
   3  14   1  215.44   29.74
   3  14  -1  235.27   30.57
   3  14   2   -0.45   12.05
  -3  14  -2   -1.10   10.70
  -3  14   2    0.19   11.28
  -3 -14  -2   -9.24    9.74
   3  14  -2    5.17   11.71
   3  14   3   -8.37   10.73
  -3  14  -3   -9.26   10.60
  -3  14   3   11.36   13.39
   3  14  -3    0.37   12.29
   3 -14   4  418.04   44.43
  -3 -14   4  443.11   43.01
   3  14   4  465.71   42.83
  -3  14   4  377.19   41.32
  -3 -14   4  499.75   46.18
   3 -14   4  476.49   44.52
  -3 -14   5  355.13   39.70
  -3  14   5  299.84   38.91
  -3 -14   5  343.56   40.30
   3 -14   5  283.38   38.79
   3  14   5  354.18   39.89
   3 -14   5  315.46   38.62
  -3 -14   6  540.83   50.59
   3 -14   6  598.79   53.22
   3 -14   6  528.99   52.24
   3  14   6  518.61   50.74
  -3 -14   6  611.57   53.84
  -3  14   6  578.61   53.43
   3 -14   7   -0.88   15.23
  -3 -14   7    9.09   16.61
   3 -14   7   11.20   18.78
  -3 -14   7   -0.09   17.94
   3  14   7    7.20   20.10
  -3  14   7   26.69   20.76
   3  15   0    0.32   11.74
  -3 -15   0   25.05   11.49
  -3  15   0    4.52   13.26
  -3 -15  -1   12.52    9.49
   3  15   1   10.82   13.92
   3 -15  -1   10.02   10.26
   3  15  -1   10.09   13.61
  -3  15   1    9.72   13.43
  -3  15  -1    2.66   12.90
  -3  15   2   11.30   14.61
   3  15  -2   19.53   14.09
   3  15   2   34.65   16.03
  -3  15  -2    8.96   12.76
  -3 -15  -2    8.38   10.77
   3  15  -3  404.05   40.84
   3  15   3  438.54   41.21
  -3  15  -3  415.12   41.68
  -3 -15  -3  397.35   35.48
  -3  15   3  309.45   37.97
   3  15   4   52.35   18.57
   3  15  -4   35.37   17.12
  -3  15  -4   70.28   20.72
  -3  15   4   45.93   18.60
   3 -15   5   45.62   22.16
  -3 -15   5   70.80   22.81
  -3 -15   5   39.00   20.22
   3 -15   5   75.70   24.33
   3  15   5   95.32   22.66
  -3  15   5   85.30   23.52
  -3 -15   6   82.42   25.59
   3  15   6   85.52   25.84
   3 -15   6   32.16   20.83
   3 -15   6   58.52   23.47
  -3  15   6   79.27   25.47
  -3 -15   6   74.52   25.55
  -3  16   0   -1.30   12.34
   3  16   0    1.11   12.86
  -3 -16   0   -5.72   11.03
  -3  16   1  139.45   26.94
   3  16  -1  122.49   25.77
  -3  16  -1  122.95   25.67
   3  16   1   86.22   21.69
   3  16   2  122.09   24.77
  -3  16   2  105.70   24.72
  -3 -16  -2  123.70   22.01
  -3  16  -2  109.08   24.76
   3  16  -2   91.80   22.56
   3  16   3   40.02   16.33
  -3 -16  -3   -2.79   13.25
  -3  16   3   17.27   14.63
   3  16  -3    8.80   15.42
  -3  16  -3    6.52   14.02
  -3  16  -4  285.33   38.13
   3  16  -4  345.17   39.85
   3  16   4  401.91   42.38
  -3  16   4  330.18   41.39
  -3 -16  -4  298.16   33.93
  -3  16   5  130.49   29.40
   3  16   5  181.80   31.91
  -3 -16   6  170.40   33.25
  -3  16   6  135.50   31.27
   3  16   6  115.22   28.51
   3 -16   6  132.71   30.53
   3 -16   6  116.47   30.57
  -3 -16   6  109.30   27.68
  -3  17   0   17.75   14.57
   3  17   0   -6.71   12.46
   3  17   1  -14.98   12.12
  -3  17   1   -3.47   13.16
  -3  17  -1   18.78   14.98
  -3 -17  -1   -6.40   11.01
   3  17  -1  -15.49   11.93
   3  17  -2   36.77   18.91
   3  17   2    7.74   14.90
  -3 -17  -2    4.61   13.15
  -3  17  -2   23.58   16.79
  -3  17   2   -2.72   14.62
  -3  17   3  668.14   53.25
   3  17   3  623.44   50.37
  -3  17  -3  593.54   54.07
   3  17  -3  565.55   51.73
  -3 -17  -3  580.39   44.37
  -3  17   4   30.14   17.97
   3  17  -4   -4.38   14.47
  -3  17  -4   29.16   16.30
  -3 -17  -4   14.64   16.72
   3  17   4   50.75   20.31
  -3  17  -5   44.36   19.47
   3  17  -5   11.43   18.41
   3  17   5   55.45   24.21
  -3  17   5   45.52   21.48
  -3  18   0   -0.73   16.13
   3  18   0   -5.54   13.93
   3  18  -1  135.28   28.64
  -3  18   1   75.33   23.87
  -3  18  -1  141.02   28.48
   3  18   1  125.64   25.91
   3  18  -2   16.61   18.48
  -3 -18  -2   28.99   16.22
   3  18   2   41.64   19.51
  -3  18  -2   19.94   18.04
  -3  18   2   39.86   19.71
  -3  18   3   40.40   20.43
   3 -18  -3   26.45   15.29
  -3  18  -3  -16.13   14.16
  -3 -18  -3   12.39   15.10
   3  18  -3    9.39   15.84
   3  18   3   20.57   16.94
   3  18   4  112.99   28.63
  -3  18   4  144.11   30.77
  -3 -18  -4  153.68   26.84
   3  18  -4  122.20   30.06
  -3  18  -4  138.93   28.64
  -3  19   0   14.93   18.08
   3  19   0   44.12   20.47
   3  19   1   17.92   17.76
  -3  19   1   34.80   20.18
  -3  19  -1   61.71   21.72
   3  19  -1   23.74   18.22
   3  19   2   20.16   17.62
  -3  19  -2   36.60   21.19
  -3  19   2   17.48   21.55
   3  19  -2   57.53   23.08
   3  19  -3  139.24   30.07
  -3  19  -3  107.39   28.22
  -3 -19  -3  121.01   23.88
   3  19   3  152.36   31.17
  -3  19   3  106.99   27.54
  -3  20   0   14.84   17.50
   3  20   0    2.71   17.56
  -3  20  -1  116.96   29.67
   3  20  -1  135.80   31.70
  -3  20   1  167.58   32.49
   3  20   1  164.52   33.70
  -4   0   0 2058.91   80.39
  -4   0   0 1972.42   83.37
  -4   0   1 4893.41  198.53
   4   0   1 4901.40  194.39
  -4   0   2  547.77   27.34
   4   0   2  551.18   27.57
  -4   0   2  515.49   28.07
  -4   0   3 2782.59  120.38
   4   0   3 2821.41  118.47
  -4   0   3 2806.90  118.70
   4   0   4  412.36   26.40
  -4   0   4  402.20   26.65
  -4   0   4  381.50   26.24
   4   0   5  111.34   16.15
  -4   0   5  111.63   15.79
  -4   0   5  100.46   15.51
   4   0   6  718.31   44.90
  -4   0   6  719.43   45.01
  -4   0   7   45.47   15.07
   4   0   7   57.99   15.82
  -4   0   8  277.79   33.11
   4   0   8  316.71   34.16
  -4   0   9    4.65   13.83
   4   0   9   23.93   15.15
   4   0  10   47.95   19.82
  -4   0  10  108.07   25.67
   4   1   0 2724.20  111.46
  -4   1   0 2759.46  111.37
  -4   1   0 2744.34  114.39
   4   1   0 2886.37  111.49
  -4  -1   0 2780.55  110.45
   4   1   0 2818.57  107.08
  -4   1   1   -5.50    1.82
  -4  -1   1   -3.96    1.36
  -4  -1   1   -0.22    3.91
   4   1   1   -6.30    3.03
   4  -1   1   -6.15    3.11
  -4  -1  -1   -5.42    1.83
  -4   1   1   -1.38    3.84
  -4   1  -1   -6.90    2.31
  -4   1   2  835.14   38.73
  -4  -1   2  789.53   37.84
   4   1   2  774.51   37.61
   4  -1   2  832.98   38.36
  -4   1   2  804.85   38.21
  -4  -1   2  845.89   39.61
   4  -1   3   -5.97    4.90
  -4   1   3   12.18    6.91
   4   1   3    3.89    5.90
  -4  -1   3   14.48    7.06
  -4  -1   3    4.27    5.66
  -4   1   3   -0.15    4.75
   4  -1   4  198.78   18.66
  -4  -1   4  184.50   18.30
   4   1   4  198.13   18.43
  -4   1   4  216.45   19.27
  -4  -1   4  218.74   18.89
  -4   1   4  213.31   18.01
  -4   1   5   31.10   10.71
   4  -1   5   10.82    8.34
   4   1   5   15.25    8.14
  -4  -1   5    9.21    8.35
  -4   1   5   15.45    7.50
  -4  -1   5   30.87    9.33
   4  -1   6  100.36   17.78
  -4   1   6  109.30   18.86
  -4  -1   6  128.84   19.31
   4   1   6  100.70   17.55
  -4  -1   7   15.03   12.14
   4  -1   7   -8.62    9.34
  -4   1   7    1.65    9.77
   4   1   7   12.68   10.58
   4  -1   8   45.82   16.89
  -4  -1   8   40.69   17.27
   4   1   8   64.81   17.61
  -4   1   8   52.65   18.40
   4   1   9   -0.80   11.39
   4  -1   9   14.92   14.28
  -4   1   9   16.49   16.25
  -4  -1   9   18.63   15.49
   4  -1  10  194.40   34.56
  -4   1  10  263.34   37.46
  -4  -1  10  234.35   35.59
   4   1  10  231.59   35.65
   4   2   0   28.53    4.48
  -4  -2   0   30.69    4.09
  -4  -2   0   27.79    5.28
  -4   2  -1  914.53   36.72
   4   2   1  901.50   39.57
  -4  -2  -1  885.47   39.09
   4  -2   1  955.64   40.86
  -4   2   1  873.07   40.62
  -4   2   1  880.12   40.27
  -4  -2   1  907.13   41.33
  -4  -2   1  948.19   40.40
   4   2   2  332.13   19.85
  -4   2   2  353.10   19.88
  -4  -2   2  327.22   20.99
  -4  -2   2  342.44   20.09
   4  -2   2  365.13   20.79
  -4   2   2  356.41   20.47
  -4  -2   3  979.40   48.83
   4  -2   3  997.21   49.12
  -4   2   3  982.72   48.23
   4   2   3  989.66   48.41
  -4   2   3 1074.49   49.79
  -4  -2   3 1104.71   51.31
  -4   2   4  983.21   51.45
   4   2   4 1026.05   51.61
   4  -2   4 1082.36   52.58
  -4   2   4 1064.93   51.55
  -4  -2   4  993.58   51.75
  -4  -2   4  972.13   52.71
  -4  -2   5  182.92   20.19
  -4   2   5  194.60   19.02
  -4  -2   5  161.99   19.76
  -4   2   5  154.48   19.15
   4  -2   5  152.96   18.91
   4   2   5  172.71   19.55
  -4  -2   6  257.56   26.59
  -4   2   6  263.82   26.20
   4   2   6  221.93   24.57
   4  -2   6  273.18   26.71
  -4   2   6  201.03   22.55
   4   2   7   22.25   11.71
  -4   2   7   28.66   13.66
   4  -2   7   13.41   10.72
  -4  -2   7    5.24   10.98
  -4   2   8   78.11   19.81
  -4  -2   8   70.94   19.49
   4  -2   8   43.77   15.39
   4   2   8   54.88   17.00
  -4   2   9  111.09   25.80
   4   2   9   94.83   22.57
  -4  -2   9  113.08   25.13
   4  -2   9  178.40   29.16
   4   2  10  201.39   33.54
   4  -2  10  222.43   35.08
  -4   2  10  208.50   35.43
  -4  -2  10  236.60   35.95
   4   3   0 7651.73  302.72
  -4   3   0 7460.72  303.47
  -4   3   0 7540.61  307.26
  -4  -3   0 7654.09  297.58
  -4  -3   0 7879.32  305.88
  -4  -3  -1   -2.47    2.90
  -4   3   1    1.86    4.90
  -4  -3   1   -8.13    4.62
   4   3   1  -10.79    3.79
  -4  -3   1   -8.07    4.24
  -4  -3   1    3.23    4.85
   4  -3   1   -3.81    4.91
  -4   3   1    1.04    5.58
   4   3   2 1846.78   77.14
  -4  -3   2 1772.15   77.27
  -4  -3   2 1886.57   79.61
   4  -3   2 1750.57   77.75
  -4   3   2 1747.96   77.48
  -4   3   2 1745.65   76.55
   4   3   3   14.35    7.04
  -4   3   3   15.27    5.82
   4  -3   3   12.87    6.62
  -4   3   3   12.86    7.56
  -4  -3   3   21.11    7.60
  -4  -3   3   14.24    6.99
  -4  -3   4  334.43   24.19
  -4  -3   4  332.72   24.28
   4   3   4  304.48   22.76
   4  -3   4  289.46   22.90
  -4   3   4  312.28   21.77
  -4   3   4  342.24   24.77
  -4   3   5   37.49    9.62
  -4   3   5   28.57   10.53
   4   3   5   55.58   12.21
  -4  -3   5   59.95   12.77
   4  -3   5   50.49   12.41
  -4   3   6  144.93   17.99
  -4   3   6  107.61   19.20
   4   3   6  148.95   20.55
   4  -3   6   90.75   17.71
  -4  -3   6  139.77   20.97
   4  -3   7   19.87   12.35
  -4  -3   7   -2.32   10.98
   4   3   7   22.61   11.98
  -4   3   7   29.01   13.23
   4  -3   8   98.39   20.90
  -4   3   8   89.04   22.17
  -4  -3   8  131.79   25.06
   4   3   8   90.96   20.87
   4  -3   9   23.61   15.89
   4   3   9   16.64   14.47
  -4   3   9   31.17   17.23
  -4  -3   9   29.51   17.49
  -4  -3  10  166.54   31.39
   4  -3  10  170.20   31.69
   4   3  10  250.04   37.11
  -4   3  10  152.51   31.38
  -4   4   0 1583.64   69.52
   4   4   0 1587.11   69.47
  -4  -4   0 1612.22   68.24
  -4   4   0 1611.29   70.70
  -4  -4   0 1656.47   67.24
  -4  -4   1 1358.61   62.96
  -4   4   1 1448.20   62.24
   4  -4   1 1420.35   61.64
   4   4   1 1492.63   58.81
  -4  -4  -1 1399.38   58.63
   4  -4   1 1460.60   64.42
  -4   4   1 1366.31   63.61
   4   4   1 1451.04   63.00
   4   4   2 1480.12   65.65
  -4  -4   2 1472.20   66.68
  -4  -4   2 1413.07   63.06
  -4   4   2 1471.57   66.37
  -4   4   2 1468.63   63.76
   4  -4   2 1528.56   66.84
  -4  -4   2 1433.08   65.65
   4  -4   3 1793.90   80.04
  -4   4   3 1818.86   77.42
  -4  -4   3 1712.97   79.11
   4   4   3 1812.85   79.21
  -4   4   3 1689.52   79.44
  -4  -4   3 1705.35   80.47
  -4  -4   4   88.99   15.10
  -4  -4   4   67.91   12.93
  -4   4   4   96.97   14.70
  -4   4   4  124.62   12.73
   4  -4   4  104.24   14.79
   4   4   4   95.14   14.20
  -4   4   5   47.06   10.23
   4  -4   5   27.51   11.34
  -4  -4   5   47.32   12.41
   4   4   5   37.53   11.09
  -4   4   5   48.09   12.38
  -4  -4   6  535.78   38.22
  -4   4   6  469.45   36.51
   4  -4   6  559.90   38.73
   4   4   6  536.66   37.61
  -4   4   6  569.54   35.23
  -4   4   7   64.40   17.41
  -4  -4   7   57.69   17.55
   4  -4   7   43.33   15.82
   4   4   7   48.30   15.42
  -4   4   8  203.24   30.36
  -4  -4   8  260.97   32.83
   4   4   8  283.17   32.54
   4  -4   8  235.00   31.48
  -4  -4   9   31.87   18.52
   4  -4   9   42.91   18.28
   4   4   9   24.50   15.56
  -4   4   9   19.35   16.56
   4  -4  10   74.86   23.36
   4   4  10   52.52   21.21
  -4   4  10   40.91   21.08
  -4  -4  10   69.40   23.96
   4   5   0 3738.04  155.46
  -4   5   0 3716.91  155.50
  -4  -5   0 3762.32  152.84
  -4   5   0 3789.48  156.69
  -4  -5   0 3849.53  151.98
  -4   5   1  274.68   16.99
  -4  -5   1  294.36   19.23
   4  -5   1  293.66   13.27
   4   5   1  297.37   19.27
   4  -5   1  288.13   20.57
  -4   5   1  271.23   20.12
  -4  -5   1  226.00   16.09
   4  -5   1  272.67   19.19
  -4  -5   1  275.84   19.38
  -4  -5   2 1327.32   60.54
  -4  -5   2 1295.76   60.79
  -4  -5   2 1309.13   57.66
  -4   5   2 1327.68   61.49
  -4   5   2 1285.53   57.06
  -4  -5  -2 1250.33   53.60
   4   5   2 1387.67   60.79
   4  -5   2 1245.25   61.08
   4   5   3   97.70   13.52
  -4  -5   3   88.89   13.33
  -4  -5   3  120.78   14.60
   4  -5   3   75.30   12.54
  -4   5   3   85.94    9.73
  -4   5   3  106.56   14.62
   4  -5   4   26.94    9.71
  -4  -5   4   22.14    9.14
  -4   5   4   19.85    6.40
  -4   5   4   17.42    8.93
   4   5   4   11.02    8.05
   4   5   5  101.57   17.15
   4  -5   5  102.88   17.05
  -4   5   5   75.97   15.98
  -4  -5   5  137.55   18.84
  -4   5   5  121.21   14.07
   4   5   6   78.34   16.94
  -4   5   6   85.60   17.97
  -4   5   6   62.92   12.17
   4  -5   6   86.92   18.43
  -4  -5   6   99.37   19.11
   4  -5   7   22.53   13.53
  -4  -5   7   -1.57   12.58
  -4   5   7   14.50   11.94
   4   5   7   44.14   14.00
   4  -5   8  -10.67   11.38
   4   5   8   58.78   17.94
  -4   5   8   29.87   16.80
  -4  -5   8   40.00   16.73
  -4  -5   9   28.41   18.27
   4   5   9   34.90   16.91
   4  -5   9   32.80   18.23
  -4   5   9   41.81   19.88
   4  -5  10  118.59   28.27
  -4   5  10  109.06   27.97
  -4  -5  10  122.77   28.64
   4   5  10  127.75   28.52
   4   6   0   32.68    8.76
  -4  -6   0   36.27    8.14
  -4   6   0   40.07    7.46
  -4   6   0   30.45    9.44
  -4   6   1 1937.06   81.08
  -4   6   1 1945.03   85.59
   4  -6   1 1915.82   75.72
   4  -6   1 1831.29   85.11
   4   6   1 1937.59   84.18
  -4  -6   1 1635.75   79.65
  -4  -6   1 1985.63   81.71
  -4  -6   1 1939.73   84.71
   4  -6   1 1856.19   82.02
  -4   6   2  553.02   32.49
   4  -6   2  589.00   33.16
  -4   6   2  552.52   26.64
  -4  -6   2  458.97   30.39
   4   6   2  503.03   30.62
  -4  -6   2  509.90   28.39
   4  -6   3  777.76   43.89
  -4  -6   3  833.86   43.68
  -4   6   3  732.50   43.26
  -4   6   3  821.93   38.28
   4   6   3  770.93   42.74
  -4   6   4  539.36   29.34
  -4   6   4  558.69   35.41
   4  -6   4  540.51   34.78
  -4  -6   4  486.68   33.33
   4   6   4  508.54   33.65
  -4   6   5   36.55    8.55
  -4   6   5   30.26   12.26
   4   6   5   38.15   12.42
  -4  -6   5   49.38   14.04
   4  -6   5   44.13   12.82
  -4  -6   6  460.78   36.36
  -4   6   6  449.98   36.66
   4  -6   6  500.39   37.00
  -4   6   6  483.92   30.85
   4   6   6  422.90   34.59
   4   6   7   35.64   14.62
   4  -6   7   22.39   13.85
  -4   6   7   35.05   15.50
  -4  -6   7   26.28   14.91
   4   6   8  163.02   27.63
   4  -6   8  203.14   30.56
  -4   6   8  241.62   32.96
  -4  -6   8  200.71   30.88
  -4   6   9  108.86   26.70
   4   6   9   37.82   18.74
   4  -6   9   43.96   19.35
  -4  -6   9   64.04   23.00
  -4  -7   0 1593.35   69.92
   4   7   0 1592.22   73.17
  -4   7   0 1530.99   73.89
  -4   7   0 1559.26   69.85
   4  -7   1  104.23    8.54
  -4  -7  -1  101.29   13.19
   4   7   1   98.14   13.92
  -4   7   1  108.87   10.36
  -4   7   1  105.86   15.37
  -4  -7   1  114.24   12.39
  -4   7  -1   97.05   14.81
   4  -7   2 1717.28   81.65
   4   7   2 1713.77   79.70
  -4  -7   2 1759.02   77.87
  -4   7   2 1651.37   80.49
   4  -7   2 1775.17   78.75
  -4  -7   2 1734.22   75.53
  -4  -7   2 1761.10   81.08
  -4   7   2 1689.73   73.79
   4   7   3    7.98    7.62
  -4   7   3    2.60    3.55
  -4   7   3    7.20    7.68
   4  -7   3   -5.81    5.93
  -4  -7   3   -6.70    6.25
   4  -7   4  432.37   32.40
  -4  -7   4  388.82   30.97
  -4   7   4  464.33   33.04
   4   7   4  453.20   31.91
  -4   7   4  492.93   26.01
   4  -7   5    3.02    8.95
  -4   7   5   26.20   11.76
   4   7   5    3.09    9.76
  -4  -7   5    7.92    9.91
  -4   7   5    9.64    6.14
   4  -7   6   80.26   18.60
  -4  -7   6  101.67   19.74
   4   7   6   86.43   18.83
  -4   7   6   87.29   20.11
   4  -7   7   -0.21   10.57
   4   7   7   -5.51    9.27
  -4  -7   7   -3.67   12.30
  -4   7   7  -20.80    9.95
  -4   7   8   72.91   21.82
   4  -7   8   67.43   18.59
  -4  -7   8   88.37   22.15
   4   7   8   41.88   16.61
   4   7   9    2.72   16.53
   4  -7   9   26.54   16.75
  -4   7   9    5.22   16.47
  -4  -7   9   -7.93   15.91
  -4   8   0  726.69   42.63
   4   8   0  742.91   41.62
  -4  -8   0  729.86   38.45
  -4   8   0  746.05   37.57
   4   8  -1 1041.88   53.77
  -4  -8   1 1008.82   49.30
   4  -8   1  988.49   44.50
  -4  -8  -1 1103.77   51.46
  -4   8   1  972.27   53.88
  -4   8  -1 1024.44   54.51
  -4   8   1 1026.33   47.75
   4   8   1 1013.25   53.10
  -4   8   2  668.73   31.91
  -4  -8   2  607.48   37.76
  -4   8   2  665.06   40.28
   4  -8   2  702.85   41.14
   4  -8   2  642.62   38.50
   4  -8   2  652.49   28.66
   4   8   2  639.96   38.76
  -4  -8   2  667.28   40.23
  -4  -8   2  681.13   35.29
   4  -8   3 1267.23   65.06
  -4   8   3 1203.20   54.67
  -4   8   3 1228.13   64.46
  -4  -8   3 1209.81   63.79
   4   8   3 1279.93   63.74
  -4   8   4  346.64   30.48
  -4   8   4  325.33   20.29
  -4  -8   4  366.95   29.57
   4  -8   4  361.38   29.85
   4   8   4  357.03   28.35
  -4   8   5  247.62   28.37
   4  -8   5  254.88   28.16
  -4   8   5  271.48   18.93
   4   8   5  266.50   27.86
  -4  -8   5  299.43   29.49
  -4  -8   6  182.87   26.08
   4  -8   6  177.98   26.13
  -4   8   6  217.49   28.89
   4   8   6  145.34   24.38
   4   8   7   74.59   19.31
  -4   8   7   44.23   18.49
  -4  -8   7   71.99   19.10
   4  -8   7   79.58   20.21
  -4  -8   8  195.26   31.88
   4  -8   8  132.79   27.32
  -4   8   8  190.46   31.09
   4   8   8  223.52   31.88
  -4   8   9   18.60   18.48
   4   8   9   15.48   16.89
   4  -8   9   50.41   21.39
  -4  -8   9   52.26   22.46
  -4   9   0 1591.09   68.82
  -4   9   0 1416.28   73.61
   4   9   0 1568.13   73.99
  -4  -9   0 1392.16   68.31
  -4   9   1   19.35   10.24
   4  -9   1   11.37    5.41
  -4  -9   1    1.34    6.32
   4   9   1    3.60    7.40
  -4  -9  -1   16.94    8.02
  -4   9  -1   14.43    9.18
   4   9  -1    8.29    7.48
  -4   9   1   21.02    6.21
   4   9   2  930.77   51.32
   4  -9   2  955.89   53.29
  -4  -9   2  987.83   51.11
   4  -9   2  921.45   39.84
  -4  -9   2  902.71   46.18
  -4  -9   2  894.35   51.71
   4  -9   2  927.10   50.84
  -4   9   2  889.54   42.13
  -4   9   2  924.24   52.25
  -4  -9   3   13.42    7.33
   4  -9   3   10.88    8.84
  -4  -9   3   26.54   11.20
   4   9   3   -0.65    8.09
  -4   9   3    3.17   10.39
  -4  -9   3   11.71   10.15
   4  -9   3    3.86    9.12
  -4   9   3   18.64    4.60
   4  -9   4   27.80   12.17
   4   9   4   14.81   10.12
  -4  -9   4   22.01   11.78
  -4   9   4   30.32   13.47
  -4  -9   5  120.12   20.99
   4   9   5   88.84   19.77
  -4   9   5   65.18   20.27
   4  -9   5   81.57   18.47
  -4  -9   6   40.54   16.65
   4  -9   6   17.66   14.18
  -4   9   6   44.34   16.97
   4   9   6   47.70   16.25
   4   9   7    7.87   12.56
   4  -9   7   10.71   14.14
  -4  -9   7   25.92   16.72
  -4   9   7   29.92   15.93
  -4  -9   8   11.89   15.92
   4  -9   8   45.71   20.01
   4   9   8   23.99   15.51
  -4   9   8   30.52   17.13
   4   9   9   30.68   18.81
  -4  -9   9   39.99   21.87
  -4   9   9   46.97   20.96
   4  -9   9   29.74   20.02
  -4  10   0  808.90   48.91
   4  10   0  781.03   47.19
  -4  10   0  849.79   42.35
  -4  10  -1 1163.92   68.44
   4  10   1 1341.50   68.97
  -4  10   1 1362.39   61.11
  -4 -10   1 1346.94   63.61
   4 -10   1 1413.34   59.28
  -4  10  -1 1345.68   64.36
   4  10  -1 1300.56   68.88
  -4 -10  -1 1320.95   64.64
  -4  10   2  325.91   30.45
  -4 -10   2  353.50   30.47
  -4  10   2  392.42   20.78
   4 -10   2  410.43   20.49
  -4 -10   2  389.75   25.71
  -4 -10   2  363.93   32.07
   4  10   2  328.12   30.04
  -4 -10   3  932.60   55.13
   4 -10   3  906.48   53.60
   4 -10   3  915.52   55.49
   4  10   3  912.93   53.65
  -4 -10   3  837.61   51.18
  -4 -10   3  959.29   47.16
  -4  10   3 1020.00   56.82
   4 -10   4  165.82   24.39
   4 -10   4  129.48   23.01
  -4  10   4  156.00   24.30
   4  10   4  182.25   24.06
  -4 -10   4  149.82   23.40
  -4 -10   5  144.83   24.01
  -4  10   5   78.24   20.24
   4 -10   5  129.20   22.73
   4  10   5   87.63   20.03
  -4 -10   6  207.27   29.76
   4  10   6  169.31   27.51
  -4  10   6  240.42   32.28
   4 -10   6  174.42   27.39
   4  10   7   21.80   14.79
   4 -10   7   16.36   15.20
  -4  10   7   24.58   17.29
  -4 -10   7   11.83   15.51
  -4 -10   8  198.23   33.40
   4 -10   8  220.17   35.67
   4  10   8  169.60   30.79
  -4  10   8  193.66   33.39
  -4  10   9   16.93   21.01
  -4 -10   9   47.53   22.73
   4 -10   9   42.32   22.74
   4  10   9   57.69   21.92
  -4  11   0 1286.47   59.79
  -4  11   0 1236.81   67.63
   4  11   0 1159.46   65.51
  -4 -11  -1    9.98    8.34
   4  11   1   15.77   11.07
  -4  11   1   18.19   11.78
   4  11  -1   -5.74    8.93
  -4  11  -1    4.45    6.07
  -4 -11   1    6.32    7.11
   4 -11   1   15.50    6.14
  -4  11   1    4.75    5.46
  -4  11  -1   13.16   11.73
  -4  11  -2  822.97   50.75
  -4 -11   2  753.60   42.26
   4  11   2  847.19   49.69
  -4  11   2  766.42   49.75
   4  11  -2  771.70   48.80
  -4  11   3   41.64   14.83
   4  11   3   41.32   14.21
  -4 -11   3   63.74   11.93
   4 -11   3   33.03   13.86
   4 -11   3   46.38   15.03
  -4 -11   3   45.98   15.70
  -4 -11   3   21.93   12.94
   4 -11   4  448.13   38.98
  -4  11   4  387.39   36.52
   4 -11   4  379.01   35.95
   4  11   4  399.09   36.13
  -4 -11   4  357.69   34.54
  -4 -11   4  431.04   37.94
   4 -11   5   42.37   16.89
  -4  11   5   44.89   18.33
  -4 -11   5   38.25   15.99
   4  11   5   47.32   17.33
  -4 -11   6   66.89   20.47
   4 -11   6   65.83   19.96
   4  11   6   53.28   19.63
  -4  11   6   71.77   22.00
   4 -11   7   -1.02   15.20
  -4  11   7   15.52   16.13
   4  11   7   -9.89   12.27
  -4 -11   7    1.13   15.82
   4  11   8   75.97   22.96
  -4  11   8   88.65   25.67
   4 -11   8   75.25   23.48
  -4 -11   8   67.88   23.89
  -4  12   0    2.49    5.61
   4  12   0    1.35    9.65
   4 -12   0    1.09    6.31
  -4 -12   0    7.62    6.00
  -4  12   0    5.18   11.26
   4 -12   1  511.14   27.62
  -4 -12   1  439.67   30.82
  -4  12  -1  464.29   37.40
   4  12  -1  359.81   35.05
  -4  12   1  484.53   37.75
  -4 -12  -1  363.87   30.38
  -4  12  -1  477.16   30.25
   4  12   1  520.95   37.34
  -4  12  -2  216.86   28.75
   4  12  -2  258.22   29.36
  -4  12   2  296.82   31.01
  -4 -12   2  297.44   22.85
   4  12   2  240.06   27.83
  -4 -12  -2  246.50   25.08
   4 -12   3  672.02   45.68
   4 -12   3  633.04   47.41
  -4 -12   3  694.64   38.01
  -4 -12   3  710.92   48.10
   4  12   3  608.00   44.45
  -4 -12   3  639.52   44.96
  -4  12   3  558.51   44.59
  -4 -12   4  324.63   35.74
   4  12   4  398.21   37.01
   4 -12   4  419.80   39.52
  -4 -12   4  390.06   36.77
  -4  12   4  331.46   36.69
   4 -12   4  374.27   36.50
  -4  12   5   42.35   17.78
  -4 -12   5   72.86   20.74
   4 -12   5   60.51   17.80
   4 -12   5   86.03   20.43
   4  12   5   62.88   18.75
  -4 -12   5   60.88   19.64
   4 -12   6  148.13   27.49
  -4  12   6  112.83   24.86
   4  12   6  172.46   29.29
  -4 -12   6  179.59   30.89
   4  12   7    7.62   16.19
  -4  12   7   53.40   19.96
   4 -12   7   21.40   16.44
  -4 -12   7   81.97   23.32
   4  12   8   98.63   26.40
   4 -12   8   92.40   25.69
  -4 -12   8  107.21   27.65
  -4  12   8   81.52   27.83
  -4  13   0 1290.14   75.56
   4 -13   0 1316.53   64.73
  -4 -13   0 1487.53   70.39
   4  13   0 1412.86   75.83
   4  13  -1   15.86   11.66
   4  13   1   -8.93   10.57
  -4  13  -1    7.56    7.17
  -4 -13   1    3.66    8.82
  -4  13  -1   -2.71   11.99
  -4  13   1    6.81   12.23
  -4 -13  -1   -8.13    8.10
  -4  13  -2  444.83   42.04
  -4 -13  -2  565.71   37.74
   4  13  -2  494.41   40.70
  -4 -13   2  649.73   36.70
  -4  13   2  484.04   40.77
   4  13   2  591.84   42.41
   4  13   3   -6.45   10.49
   4  13  -3   -4.72   11.59
  -4  13  -3   -3.66   11.52
  -4  13   3    7.47   12.03
  -4  13   4   95.09   23.43
  -4 -13   4   86.21   21.41
   4 -13   4  118.38   24.15
   4  13   4  159.15   25.90
  -4 -13   4  117.33   24.36
   4 -13   4  103.65   22.97
  -4 -13   5    0.03   13.39
  -4  13   5    2.57   12.57
  -4 -13   5   -7.55   12.22
   4 -13   5    2.39   12.97
   4  13   5    4.63   13.32
   4 -13   5   -1.19   12.65
  -4 -13   6  119.99   26.46
   4  13   6   81.50   22.08
  -4  13   6  128.36   27.56
  -4 -13   6   70.80   23.32
   4 -13   6   80.60   22.60
   4 -13   6   96.17   25.39
   4  13   7    1.59   15.47
  -4 -13   7  -14.12   16.59
   4 -13   7    8.59   16.74
   4 -13   7    4.91   14.85
  -4  13   7  -18.00   15.22
  -4  14   0  180.72   27.55
   4 -14   0  193.99   19.72
   4  14   0  194.19   27.66
  -4 -14   0  192.41   23.08
  -4 -14  -1  795.29   49.36
   4  14   1  774.40   53.77
   4  14  -1  870.68   56.34
  -4  14   1  901.69   57.49
  -4 -14   1  906.57   49.65
  -4  14  -1  747.20   54.71
  -4  14  -2  182.01   28.77
  -4  14   2  204.41   30.17
   4  14   2  227.04   30.12
   4  14  -2  274.59   32.48
  -4 -14  -2  256.93   27.18
  -4  14  -2  256.77   25.66
  -4  14  -3  424.14   41.86
  -4 -14  -3  440.38   35.60
   4  14   3  466.60   41.29
  -4  14   3  421.45   41.34
   4  14  -3  468.98   42.00
   4 -14   4   52.57   19.27
   4  14   4   46.04   18.47
  -4  14   4   48.31   17.65
  -4 -14   4   69.59   20.20
   4 -14   4   18.06   16.01
  -4 -14   4   34.16   18.17
   4 -14   5   14.96   13.73
   4  14   5  -14.12   14.10
  -4  14   5   -3.45   14.92
   4 -14   5   -2.54   13.32
  -4 -14   5   27.35   16.89
  -4 -14   5   -2.23   15.18
   4 -14   6  235.80   36.79
   4 -14   6  257.14   36.63
  -4 -14   6  291.19   38.39
  -4 -14   6  234.14   35.21
  -4  14   6  194.72   35.07
   4  14   6  222.54   34.75
   4  14   7   27.15   18.92
  -4  14   7   16.01   19.95
  -4 -14   7   60.75   23.61
   4 -14   7   20.01   19.87
  -4 -14   7   11.26   18.29
   4 -14   7   32.36   18.12
   4  15   0  923.90   61.27
  -4  15   0  919.40   62.21
  -4 -15   0 1015.59   56.76
   4  15   1   12.03   12.37
  -4  15   1   17.21   14.45
  -4  15  -1    4.18   11.97
  -4 -15  -1   -4.74    9.98
   4 -15  -1   13.35   10.40
   4  15  -1    7.62   12.51
   4  15  -2  426.82   40.76
   4  15   2  345.13   37.56
  -4  15  -2  384.03   40.33
  -4 -15  -2  424.74   35.81
  -4  15   2  322.16   37.83
  -4 -15  -3    6.09   10.90
  -4  15   3   28.67   15.04
  -4  15  -3  -19.67    8.75
   4  15  -3   -5.64   12.57
   4  15   3   -0.68   11.91
   4  15   4   42.29   17.02
  -4  15   4   17.85   16.52
   4  15  -4   34.66   17.94
  -4  15  -4   69.61   19.98
  -4 -15   5   30.79   17.25
   4 -15   5    6.66   15.12
   4 -15   5   21.03   16.97
  -4 -15   5   15.71   17.10
   4  15   5   34.10   16.62
  -4  15   5   -2.51   14.29
  -4 -15   6   36.99   20.36
   4 -15   6   25.42   20.12
   4 -15   6    6.12   16.77
  -4  15   6   19.04   18.34
  -4 -15   6   26.16   20.13
   4  15   6   23.78   18.96
  -4 -16   0   37.09   14.95
   4  16   0   57.72   18.96
  -4  16   0    7.79   13.67
   4  16  -1  286.37   36.30
  -4  16   1  308.80   37.30
  -4  16  -1  358.84   39.44
   4  16   1  283.61   35.40
  -4  16   2  160.72   29.07
   4  16  -2  184.78   30.76
   4  16   2  119.19   24.62
  -4  16  -2  119.23   25.82
  -4 -16  -2  190.56   25.48
  -4 -16  -3  224.62   28.55
   4  16   3  237.17   33.05
  -4  16  -3  197.81   32.26
   4  16  -3  229.19   34.42
  -4  16   3  231.04   35.11
   4  16   4  272.84   36.34
  -4  16  -4  184.87   31.56
  -4  16   4  257.38   37.30
   4  16  -4  196.82   31.80
  -4 -16  -4  190.23   28.11
   4  16   5   64.12   22.93
  -4  16  -5   92.52   24.65
  -4  16   5  109.07   27.47
   4 -16   6   24.57   21.58
   4  16   6   68.41   24.57
  -4 -16   6   64.78   25.16
   4 -16   6   74.17   24.00
  -4 -16   6   29.62   22.92
  -4  16   6   90.49   27.70
  -4  17   0  430.79   44.70
   4  17   0  335.62   40.68
  -4  17  -1   26.66   17.81
  -4 -17  -1    6.96    9.90
   4  17  -1   44.58   19.55
  -4  17   1   54.99   20.42
   4  17   1   43.25   18.10
  -4 -17  -2  349.16   34.56
   4  17  -2  264.02   37.72
  -4  17  -2  318.66   41.15
  -4  17   2  332.66   41.39
   4  17   2  353.58   40.89
   4  17  -3    9.80   14.23
   4  17   3    8.53   15.08
  -4  17   3   12.98   14.86
  -4 -17  -3   -3.36   13.53
  -4  17  -3   -5.24   13.79
  -4  17  -4   42.38   20.13
  -4 -17  -4   54.50   17.33
   4  17   4   98.77   24.90
   4  17  -4   79.25   22.49
  -4  17   4   86.80   23.52
  -4  17  -5   23.02   17.37
   4  17   5    7.37   16.39
  -4  17   5   19.05   17.54
  -4 -17  -5   33.08   16.50
   4  17  -5   13.52   16.38
   4  18   0  161.76   31.48
  -4  18   0  135.43   28.74
   4  18   1  470.18   47.57
  -4  18   1  435.60   48.14
  -4  18  -1  432.39   47.27
   4  18  -1  428.44   46.10
   4  18  -2  149.37   29.23
  -4 -18  -2  110.06   23.25
  -4  18   2  166.20   31.28
  -4  18  -2  141.90   30.32
   4  18   2  142.09   29.17
   4  18  -3  223.50   36.55
  -4 -18  -3  296.28   33.69
  -4  18  -3  198.76   35.99
  -4  18   3  258.48   38.93
   4  18   3  235.39   37.07
   4  18  -4  112.25   26.40
   4  18   4  143.00   29.56
  -4 -18  -4   59.57   18.61
  -4  18  -4   52.65   21.37
  -4  18   4   54.52   23.11
  -4  19   0  324.43   44.75
   4  19   0  312.93   42.43
  -4  19   1   29.25   20.10
  -4  19  -1   -2.21   17.69
   4  19   1   17.99   16.16
   4  19  -1   19.22   17.82
  -4  19   2  202.33   36.78
   4  19   2  237.44   37.85
  -4  19  -2  184.46   34.28
   4  19  -2  147.17   30.55
   4  19   3   -2.29   16.12
   4  19  -3    2.59   15.98
  -4  19   3    5.13   16.46
  -4  19  -3    6.25   18.24
  -4 -19  -3   47.55   19.28
  -4  20   0   97.62   28.93
   4  20   0  122.95   30.85
   4  20  -1  149.86   32.66
   4  20   1  183.52   34.34
  -4  20   1  182.12   35.51
  -4  20  -1  137.19   32.20
  -5   0   0    1.28    3.68
  -5   0   0    3.82    3.31
  -5   0  -1 2785.84  117.71
  -5   0   1 2900.83  114.65
  -5   0   1 2840.21  118.12
  -5   0  -1 2851.37  112.89
   5   0   1 2882.74  114.52
  -5   0   2 1222.37   56.33
   5   0   2 1228.12   54.38
  -5   0   2 1272.19   54.78
   5   0   3   24.24    7.40
  -5   0   3   10.99    6.50
  -5   0   3   27.53    7.81
  -5   0   4  679.11   38.50
  -5   0   4  662.54   37.56
   5   0   4  674.73   37.49
  -5   0   5   -8.84    5.50
   5   0   5   -3.60    6.48
  -5   0   5   -4.13    5.19
  -5   0   6  971.74   55.50
   5   0   6  997.30   55.17
  -5   0   6  919.99   54.44
  -5   0   7  431.79   37.47
   5   0   7  430.84   34.62
   5   0   8  173.39   26.55
  -5   0   8  196.59   28.87
   5   0   9    7.88   13.67
  -5   0   9    5.58   15.58
  -5   0  10  148.78   30.77
   5   0  10  135.00   28.60
   5   1   0   -9.83    1.72
   5   1   0   -6.96    1.72
   5   1   0   -6.64    1.87
  -5  -1   0   -1.89    3.78
  -5  -1   0   -7.26    3.20
  -5   1   0   -9.83    3.75
  -5   1   0   -4.46    3.04
  -5   1  -1 1192.61   52.18
  -5  -1   1 1152.72   48.98
  -5  -1   1 1141.59   51.52
   5   1   1 1185.52   48.90
  -5  -1  -1 1210.14   49.68
  -5   1   1 1133.63   51.53
   5  -1   1 1175.09   49.50
  -5   1  -1 1158.86   47.54
  -5   1   2    7.36    5.39
   5   1   2    3.41    5.05
   5  -1   2    7.14    5.22
  -5   1   2    0.87    4.90
  -5  -1   2   13.97    6.03
  -5  -1   2    4.13    4.65
  -5  -1   3   24.46    7.41
  -5  -1   3   14.98    6.73
  -5   1   3   15.49    6.73
   5  -1   3   27.71    7.55
   5   1   3   23.38    7.20
  -5   1   3   24.48    7.66
  -5   1   4    1.80    6.02
  -5   1   4    8.88    5.91
   5  -1   4    2.93    6.41
  -5  -1   4    8.44    7.04
  -5  -1   4   10.24    6.75
   5   1   4   -0.05    5.79
  -5   1   5 1380.00   69.96
  -5   1   5 1387.26   70.00
   5   1   5 1402.95   69.83
   5  -1   5 1483.32   70.59
  -5  -1   5 1376.17   70.83
  -5  -1   5 1448.56   70.58
  -5   1   6   97.84   17.79
  -5  -1   6   85.33   17.17
   5  -1   6   59.00   14.35
  -5   1   6   63.74   14.26
   5   1   6   79.71   15.64
  -5  -1   6   69.33   16.39
   5  -1   7  104.64   19.87
   5   1   7  108.88   19.59
  -5   1   7   97.90   19.97
  -5  -1   7  182.25   24.89
   5   1   8   32.94   14.57
  -5   1   8   -1.11   11.71
   5  -1   8   20.79   13.66
  -5  -1   8   10.53   13.61
  -5  -1   9  669.81   50.99
   5   1   9  610.31   48.07
  -5   1   9  652.38   50.36
   5  -1   9  587.67   47.56
  -5   1  10   36.36   20.26
   5  -1  10   27.76   17.70
   5   1  10   15.96   16.83
  -5  -1  10   -5.76   14.89
  -5  -2   0   -9.48    3.83
   5   2   0   -5.21    3.33
  -5   2   0   -3.22    1.49
  -5  -2   0   -2.57    2.18
  -5   2   0   -5.90    4.08
  -5   2   1  143.11   11.72
  -5   2   1  137.13   10.74
  -5  -2  -1  148.35   11.93
  -5  -2   1  155.42   12.16
  -5  -2   1  161.74   11.75
   5   2   1  145.98   10.19
  -5  -2  -1  172.38   10.88
  -5  -2   1  100.05    9.18
   5  -2   1  162.63   12.04
  -5   2  -1  166.20    8.22
   5  -2   1  153.55    8.12
  -5   2   2   19.84    6.35
  -5  -2   2   21.99    6.05
  -5   2   2   16.22    5.79
  -5  -2   2   13.04    5.80
   5   2   2   25.24    6.40
   5  -2   2   10.88    5.87
  -5   2   3 1339.56   65.32
   5  -2   3 1470.90   66.21
  -5  -2   3 1500.49   68.26
  -5   2   3 1385.61   65.73
  -5  -2   3 1492.07   66.00
   5   2   3 1480.75   65.45
  -5   2   4  738.54   40.06
  -5  -2   4  670.21   39.95
  -5  -2   4  768.39   42.57
  -5   2   4  835.85   42.14
   5   2   4  756.34   40.48
   5  -2   4  711.79   40.50
  -5  -2   5  177.29   20.68
  -5   2   5  238.40   22.27
  -5  -2   5  219.50   21.56
   5   2   5  159.18   19.08
  -5   2   5  181.14   18.97
   5  -2   5  184.73   20.34
  -5   2   6  726.44   45.56
   5  -2   6  670.98   44.35
  -5  -2   6  730.59   45.84
   5   2   6  699.12   44.19
  -5   2   6  749.38   44.03
   5  -2   7  123.29   21.66
  -5   2   7  120.21   21.60
  -5  -2   7  119.90   21.84
   5   2   7  131.26   21.61
   5  -2   8  214.20   29.22
  -5  -2   8  182.71   28.14
  -5   2   8  156.03   26.84
   5   2   8  182.50   26.92
  -5  -2   9   10.01   14.85
   5   2   9   31.03   15.73
   5  -2   9   47.76   16.51
  -5   2   9   25.84   16.63
  -5  -2  10  117.61   27.53
   5   2  10  135.81   28.22
  -5   2  10  136.93   28.79
   5  -2  10  141.42   29.18
  -5  -3   0   -9.00    4.46
  -5   3   0   -0.06    4.96
  -5   3   0   -7.09    4.85
  -5  -3   0   -9.82    3.30
   5   3   0   -5.41    4.08
  -5  -3   1 1338.40   58.33
  -5  -3   1 1408.26   59.73
  -5  -3  -1 1267.87   58.25
  -5  -3  -1 1376.89   56.77
  -5   3   1 1386.91   59.40
  -5   3   1 1296.55   59.20
   5   3   1 1362.46   57.89
   5  -3   1 1349.42   59.36
   5  -3   2   62.73    9.41
   5   3   2   41.05    7.66
  -5   3   2   43.78    7.41
  -5  -3   2   59.44    8.63
  -5   3   2   47.22    8.35
  -5  -3   2   45.68    8.71
   5   3   3   -4.24    5.34
   5  -3   3   10.78    6.50
  -5  -3   3   10.07    6.98
  -5   3   3   20.37    6.64
  -5   3   3   17.15    7.58
  -5  -3   3   15.16    6.56
  -5   3   4  146.58   16.88
   5  -3   4  135.61   15.94
  -5   3   4  121.50   14.21
   5   3   4  125.90   15.32
  -5  -3   4  170.33   17.93
  -5  -3   4  112.48   15.36
  -5   3   5 1586.43   79.18
  -5  -3   5 1472.48   80.16
  -5  -3   5 1704.70   79.70
   5  -3   5 1684.05   79.69
   5   3   5 1653.18   78.77
  -5   3   5 1674.72   78.02
  -5   3   6   33.50   13.16
  -5  -3   6   34.29   12.79
   5  -3   6   64.55   15.36
  -5   3   6   26.38    9.77
   5   3   6   48.48   13.50
   5  -3   7  213.73   27.00
  -5   3   7  184.72   26.42
  -5  -3   7  192.74   26.51
   5   3   7  164.99   24.49
  -5   3   8   18.37   13.95
   5   3   8    6.40   10.63
   5  -3   8   -5.46   11.52
  -5  -3   8   -4.63   11.95
   5   3   9  714.85   52.81
  -5   3   9  646.78   52.52
   5  -3   9  693.38   52.65
  -5  -3   9  750.85   54.55
  -5  -3  10   50.20   21.16
   5  -3  10   17.14   16.73
   5   3  10   48.18   20.60
  -5   3  10   14.63   16.16
   5   4   0  -10.25    4.12
  -5   4   0   -2.97    5.64
  -5   4   0   -0.76    4.90
  -5  -4   0   -1.13    4.88
  -5  -4   0   -4.26    3.42
   5  -4   1   -0.62    5.33
  -5  -4  -1    4.32    2.87
  -5   4   1   10.77    6.50
  -5  -4   1    1.48    4.90
   5   4   1   18.76    6.05
  -5  -4   1    1.01    2.15
   5  -4   1    4.20    5.84
  -5   4   1   10.00    5.36
  -5  -4  -1    5.42    5.69
  -5  -4   1   -3.66    4.51
  -5   4   2  235.94   18.02
  -5  -4  -2  248.16   13.60
  -5   4   2  256.33   16.39
  -5  -4   2  251.27   17.94
   5   4   2  242.58   17.13
   5  -4   2  264.44   18.83
  -5  -4   2  257.89   17.99
  -5  -4   3  376.11   25.47
   5  -4   3  386.88   25.02
  -5   4   3  354.76   25.48
  -5  -4   3  351.00   23.93
   5   4   3  381.36   24.53
  -5   4   3  372.66   22.35
   5  -4   4 1125.11   56.72
   5   4   4 1091.78   55.64
  -5   4   4 1067.93   53.43
  -5  -4   4 1211.55   59.06
  -5   4   4 1062.92   56.22
  -5  -4   4 1098.78   56.09
  -5   4   5    9.43    6.30
   5  -4   5    2.40    7.90
  -5  -4   5   -2.44    7.07
   5   4   5   -0.70    6.51
  -5   4   5    4.12    9.00
  -5   4   6  562.85   35.89
   5   4   6  617.14   39.66
   5  -4   6  518.48   38.55
  -5  -4   6  586.89   39.81
  -5   4   6  520.33   38.82
   5   4   7  413.88   37.06
   5  -4   7  427.70   37.93
  -5   4   7  427.91   38.09
  -5  -4   7  491.29   37.65
  -5   4   8  349.73   37.01
   5   4   8  316.01   34.93
   5  -4   8  348.16   36.87
  -5  -4   8  287.28   35.41
  -5   4   9  -10.99   15.37
   5   4   9   12.06   12.89
   5  -4   9   26.01   15.75
  -5  -4   9   -4.11   13.67
   5   4  10  243.35   37.01
  -5   4  10  271.96   39.55
  -5  -4  10  282.85   39.98
   5  -4  10  192.29   34.53
  -5   5   0    1.75    6.05
  -5  -5   0   -0.97    3.34
  -5   5   0    6.55    5.56
  -5  -5   0  -10.46    4.38
   5   5   0   -7.20    4.13
  -5   5   1 1791.29   82.89
  -5  -5   1 1883.46   80.32
  -5  -5  -1 1907.88   81.17
  -5   5   1 1850.20   81.15
   5  -5   1 1934.32   83.90
  -5  -5  -1 1906.66   76.74
  -5  -5   1 1870.19   82.49
   5  -5   1 1814.02   79.89
  -5  -5   1 1957.17   79.63
   5   5   1 1922.02   77.03
   5   5   1 1837.73   81.61
  -5  -5   2    7.82    6.37
  -5  -5   2    3.24    4.26
  -5   5   2    3.27    4.48
   5   5   2    1.37    5.60
   5  -5   2    2.99    6.20
  -5  -5   2    5.87    5.69
  -5   5   2    4.20    6.68
  -5  -5  -2    9.82    2.99
  -5  -5   3   15.70    7.75
  -5   5   3   18.34    5.65
  -5  -5   3   12.92    7.77
   5   5   3   13.57    7.24
  -5   5   3   24.59    8.85
   5  -5   3   19.96    7.85
  -5   5   4   49.37    9.25
   5   5   4   40.29   10.42
   5  -5   4   56.38   12.16
  -5  -5   4   44.48   11.64
  -5  -5   4   64.66   12.69
  -5   5   4   49.14   12.62
  -5   5   5  936.27   54.67
   5   5   5  932.72   53.68
   5  -5   5 1004.25   55.46
  -5  -5   5 1097.00   56.13
  -5   5   5  974.28   50.75
   5  -5   6  187.63   24.35
   5   5   6  142.86   21.21
  -5   5   6  154.28   17.96
  -5   5   6  186.47   24.14
  -5  -5   6  206.50   24.70
  -5  -5   7  203.90   27.04
   5   5   7  123.49   22.34
   5  -5   7  108.47   21.65
  -5   5   7  141.48   24.20
  -5   5   8  143.72   27.29
  -5  -5   8  154.35   27.23
   5   5   8  178.17   27.94
   5  -5   8  158.81   26.69
  -5  -5   9  719.17   53.30
   5  -5   9  572.21   52.11
  -5   5   9  561.26   52.01
   5   5   9  630.75   50.26
   5   5  10   15.29   16.91
  -5   5  10   36.98   17.63
  -5  -5  10  -14.41   14.38
   5  -5  10  -21.46   15.13
  -5   6   0  -12.79    5.62
  -5   6   0    4.92    5.31
  -5  -6   0   -5.69    4.91
  -5  -6   0    2.17    3.66
   5   6   0   -2.17    5.13
   5  -6   1   70.51   11.57
   5  -6   1   62.91   12.00
  -5   6   1  109.63   13.80
   5   6   1   86.97   11.79
  -5  -6   1   89.64   12.02
  -5  -6   1   56.63   10.85
  -5  -6  -1   72.91   11.22
  -5  -6   1   78.14    9.46
  -5   6   1   87.11    9.70
   5  -6   2  102.84   14.29
  -5  -6   2   69.17   10.75
  -5   6   2   69.89   13.12
   5   6   2   92.92   12.96
  -5  -6   2   92.66   13.39
  -5   6   2  105.82    9.98
  -5  -6   2   87.52   11.22
  -5   6   3  413.67   28.64
   5  -6   3  447.33   29.14
  -5  -6  -3  374.05   19.11
  -5  -6   3  378.37   26.40
  -5   6   3  389.29   22.47
  -5  -6   3  393.29   26.65
   5   6   3  367.65   26.02
  -5   6   4  915.14   49.92
  -5   6   4  925.77   44.15
  -5  -6   4  815.27   47.76
   5  -6   4  876.49   49.31
   5   6   4  850.95   47.88
  -5  -6   5   10.16   10.75
   5   6   5   13.17    9.84
   5  -6   5   15.50   10.28
  -5   6   5   14.20    6.55
  -5   6   5    0.71    9.04
   5  -6   6  652.47   44.77
  -5   6   6  637.43   38.56
   5   6   6  706.18   44.93
  -5  -6   6  610.52   43.92
  -5   6   6  752.50   47.45
  -5   6   7  442.71   39.74
   5  -6   7  399.30   37.96
  -5  -6   7  426.80   38.59
   5   6   7  396.29   37.35
   5   6   8  257.65   32.85
   5  -6   8  183.32   29.96
  -5   6   8  251.80   33.55
  -5  -6   8  248.91   33.26
   5   6   9   -0.68   14.53
  -5  -6   9   -3.16   15.65
  -5   6   9    4.30   16.26
   5  -6   9  -21.62   13.30
  -5  -7   0    1.39    5.41
   5   7   0  -12.87    4.49
  -5   7   0   -3.76    4.67
  -5   7   0   -1.35    6.38
  -5   7   1 1513.80   66.16
  -5   7  -1 1306.00   69.05
   5  -7   1 1448.10   60.31
  -5   7   1 1392.09   70.32
  -5  -7  -1 1522.70   67.82
   5   7   1 1660.85   70.50
  -5  -7   2  366.41   25.49
  -5  -7   2  317.28   23.52
   5   7   2  317.29   23.56
  -5   7   2  371.72   26.28
   5  -7   2  345.02   25.68
  -5  -7   2  308.53   21.59
  -5   7   2  345.08   19.88
   5  -7   2  282.38   23.08
   5   7   3   62.93   12.93
  -5   7   3   66.33   13.64
  -5  -7   3   65.78   13.23
   5  -7   3   60.03   12.83
  -5   7   3   71.57    8.72
   5   7   4  200.87   21.50
   5  -7   4  153.90   20.22
  -5   7   4  154.43   20.76
  -5  -7   4  146.75   19.68
  -5   7   4  193.35   14.67
  -5   7   5 1387.12   66.25
  -5  -7   5 1401.99   73.18
  -5   7   5 1397.89   74.64
   5   7   5 1442.70   73.56
   5  -7   5 1391.21   73.51
  -5  -7   6    7.10   11.29
  -5   7   6   14.04    7.00
   5  -7   6   23.84   11.98
  -5   7   6  -16.27    9.16
   5   7   6    0.44   10.75
   5   7   7  276.85   33.11
  -5   7   7  409.80   38.13
   5  -7   7  380.19   37.35
  -5  -7   7  329.15   35.63
  -5   7   8  -10.68   13.83
   5  -7   8  -14.59   11.28
   5   7   8   17.50   13.59
  -5  -7   8    3.84   14.60
   5  -7   9  740.18   58.27
  -5   7   9  841.69   61.80
   5   7   9  773.90   58.44
  -5  -7   9  689.67   56.87
  -5  -8   0   -7.99    4.75
  -5   8   0   -0.87    7.06
   5   8   0    2.87    6.74
  -5   8   0    2.80    5.46
  -5   8   1   25.21   10.68
  -5   8   1   38.66    7.84
   5   8   1   40.27   10.61
   5  -8   1   44.74    6.24
  -5  -8  -1   30.35    8.93
  -5  -8   1   44.03    9.05
   5   8  -1   40.61   10.82
  -5   8  -1   68.27   13.99
  -5  -8   2  348.14   27.96
   5  -8   2  353.36   27.44
  -5   8   2  441.21   22.89
   5  -8   2  406.22   30.10
  -5  -8   2  433.99   26.03
   5   8   2  398.97   28.23
  -5  -8   2  395.43   27.98
  -5   8   2  446.70   30.58
   5  -8   3  297.09   26.57
  -5   8   3  258.14   16.83
   5   8   3  273.76   24.55
  -5  -8   3  271.37   24.82
  -5   8   3  273.40   25.58
   5   8   4  539.36   36.38
  -5   8   4  568.94   38.07
  -5   8   4  531.96   29.10
  -5  -8   4  501.07   36.45
   5  -8   4  581.56   38.92
  -5   8   5   38.08   15.45
   5   8   5   45.48   14.83
  -5   8   5   66.28   10.43
  -5  -8   5   69.53   16.07
   5  -8   5   74.95   17.12
   5  -8   6  643.82   47.04
  -5  -8   6  665.31   47.11
   5   8   6  768.87   49.23
  -5   8   6  693.73   49.27
   5  -8   7  170.97   27.78
  -5  -8   7  152.80   26.94
  -5   8   7  184.37   29.30
   5   8   7  191.82   27.98
   5  -8   8  259.32   35.75
  -5  -8   8  349.85   39.39
  -5   8   8  331.05   39.17
   5   8   8  252.25   34.96
   5  -8   9   -0.35   16.06
  -5  -8   9   18.73   17.79
   5   8   9  -15.89   15.03
  -5   8   9    9.76   16.98
   5   9   0   -0.23    6.66
  -5   9   0   -6.19    3.90
  -5  -9   0    5.04    5.90
  -5   9   0   -2.01    7.62
   5   9   1  477.40   31.98
  -5   9   1  469.99   26.83
  -5   9   1  455.32   33.24
  -5   9  -1  515.02   29.81
  -5   9  -1  428.59   32.34
   5  -9   1  452.24   23.77
  -5  -9  -1  414.18   29.03
   5   9  -1  535.21   33.57
  -5  -9   1  492.98   29.30
  -5   9   2  193.31   13.66
  -5  -9   2  149.34   19.31
  -5  -9   2  156.05   20.15
   5  -9   2  168.08   21.28
  -5  -9   2  218.21   18.42
   5   9   2  144.71   18.86
  -5   9   2  151.03   20.01
   5  -9   2  179.79   10.41
   5  -9   2  170.60   21.37
   5   9   3   84.59   16.16
  -5  -9   3   98.53   13.47
   5  -9   3  118.73   18.67
  -5  -9   3  125.13   19.19
  -5   9   3   99.88    9.70
   5  -9   3   74.47   15.89
  -5  -9   3   74.98   16.10
  -5   9   3  111.78   19.19
  -5  -9   4   -4.12    9.11
   5   9   4   -7.67    7.63
  -5   9   4    5.40   11.40
   5  -9   4   -4.17    8.64
   5   9   5 1367.32   73.69
   5  -9   5 1325.65   74.42
  -5   9   5 1362.37   75.56
  -5  -9   5 1328.75   73.65
   5   9   6  164.29   25.55
   5  -9   6  171.22   27.48
  -5  -9   6  151.74   25.34
  -5   9   6  159.41   26.72
  -5  -9   7   65.29   20.91
  -5   9   7   59.73   20.95
   5  -9   7   75.02   19.58
   5   9   7   32.45   16.69
   5   9   8  135.94   26.47
   5  -9   8  142.16   28.65
  -5   9   8  121.06   27.24
  -5  -9   8  143.25   28.13
  -5  -9   9  666.72   56.29
   5   9   9  460.15   49.53
   5  -9   9  426.43   49.94
  -5   9   9  500.53   51.78
  -5  10   0    0.11    7.18
  -5 -10   0    5.69    6.57
  -5  10   0   -4.98    4.48
   5  10   0   -3.87    6.60
   5 -10   1  324.37   18.98
  -5  10  -1  272.03   27.91
  -5  10  -1  330.08   23.20
  -5  10   1  271.93   28.28
   5  10  -1  330.30   27.16
  -5 -10   1  291.33   22.97
   5  10   1  348.56   27.06
  -5  10   1  281.37   20.07
  -5 -10  -1  288.95   25.04
   5 -10   2   90.54    7.95
  -5 -10   2   66.00   12.48
  -5 -10   2   77.65   16.51
   5  10   2   60.77   15.57
  -5  10   2   67.93   16.70
  -5  10   2  102.58   10.03
  -5 -10   2   68.55   15.92
  -5 -10   3   53.96   15.09
   5  10   3   31.60   12.68
   5 -10   3   86.73   17.77
  -5 -10   3   80.38   13.05
  -5  10   3   76.36   17.19
  -5 -10   3   67.37   16.39
   5 -10   3   85.27   18.41
   5 -10   4  791.87   51.43
   5  10   4  953.50   54.25
   5 -10   4  922.75   56.13
  -5  10   4  870.32   55.32
  -5 -10   4  845.45   53.91
  -5  10   5    4.43   12.97
  -5 -10   5   -4.06   11.04
   5  10   5   14.56   11.93
   5 -10   5    2.86   11.31
  -5 -10   6  757.23   53.37
   5  10   6  755.47   52.31
   5 -10   6  693.12   52.45
  -5  10   6  821.68   55.86
  -5  10   7  374.61   41.28
  -5 -10   7  348.88   39.36
   5  10   7  350.10   38.87
   5 -10   7  273.76   36.58
  -5 -10   8  215.78   35.04
   5 -10   8  226.24   36.73
  -5  10   8  266.81   37.79
   5  10   8  237.51   35.82
  -5  10   9   42.29   21.85
   5  10   9   30.44   19.68
  -5 -10   9   13.16   19.25
   5 -10   9   25.71   19.75
  -5 -11   0    1.24    5.66
  -5  11   0    5.80    5.93
   5  11   0    4.28    8.70
  -5  11   0   12.72   11.20
   5  11  -1  542.88   40.14
  -5 -11  -1  622.82   38.59
  -5 -11   1  608.02   37.14
   5  11   1  582.04   40.54
  -5  11   1  618.55   43.21
   5 -11   1  658.60   32.66
  -5  11   1  690.70   34.77
  -5  11  -1  681.92   37.97
  -5  11  -1  603.52   42.66
  -5  11   2   48.61   15.44
  -5  11  -2   32.92   13.58
  -5 -11   2   42.94   11.20
   5  11   2   52.08   13.69
  -5 -11  -2   55.98   13.77
   5  11  -2   54.86   14.89
  -5 -11   3   54.15   15.79
   5 -11   3   61.83   17.40
   5  11   3   59.38   15.67
  -5  11   3   53.70   15.24
  -5 -11   3   66.76   16.69
  -5 -11   3   60.24   12.39
   5 -11   3   79.15   18.62
  -5 -11   4   26.14   13.99
  -5 -11   4   43.25   15.72
   5 -11   4   19.47   13.21
  -5  11   4   30.19   15.72
   5  11   4   52.31   15.57
   5 -11   4   22.72   12.55
  -5  11   5 1035.29   66.17
   5  11   5 1090.20   65.75
  -5 -11   5 1125.92   67.07
   5 -11   5 1126.64   68.29
  -5 -11   6   27.26   16.32
   5  11   6   48.09   16.81
  -5  11   6   -8.19   13.10
   5 -11   6    5.27   13.35
  -5  11   7  229.78   35.86
   5 -11   7  280.28   37.82
   5  11   7  305.05   37.31
  -5 -11   7  218.21   33.98
  -5  11   8   19.31   17.76
   5  11   8   25.42   16.65
  -5 -11   8  -17.51   15.14
   5 -11   8   33.66   18.58
  -5  12   0   -7.41    9.33
  -5  12   0   -0.52    6.47
   5 -12   0    1.93    6.09
   5  12   0   -5.05    9.34
  -5 -12   0    2.34    4.66
  -5 -12  -1   39.34   12.03
   5  12   1   67.07   16.74
   5  12  -1   20.02   12.48
  -5  12   1   27.59   13.98
  -5 -12   1   34.08   10.82
  -5  12  -1   43.44   10.96
  -5  12  -1   28.28   14.15
   5 -12   1   53.56    9.43
  -5 -12   2   63.79   13.12
  -5 -12  -2   38.56   13.02
  -5  12  -2   47.02   16.16
   5  12   2   68.18   17.00
  -5  12   2   57.89   17.08
   5  12  -2   47.31   15.19
  -5 -12   3  452.86   38.89
   5 -12   3  365.39   36.03
  -5  12   3  369.99   36.56
   5 -12   3  379.32   37.78
  -5 -12   3  377.19   27.23
  -5 -12   3  445.37   37.79
   5  12   3  435.54   34.94
   5  12   4  527.72   42.59
   5 -12   4  527.73   43.74
  -5  12   4  566.92   44.55
  -5 -12   4  595.56   43.59
   5 -12   4  593.22   43.74
  -5 -12   4  650.48   46.39
   5 -12   5   45.76   18.63
   5 -12   5   41.27   16.83
   5  12   5   40.57   16.08
  -5 -12   5   42.11   17.06
  -5 -12   5   56.78   19.21
  -5  12   5   39.09   18.22
  -5  12   6  476.86   46.54
  -5 -12   6  490.30   45.05
   5  12   6  453.73   43.63
   5 -12   6  391.72   42.88
  -5 -12   7   47.25   20.41
  -5  12   7   64.77   23.09
   5 -12   7   56.12   21.77
   5  12   7   51.27   20.64
  -5 -12   8  167.60   34.34
   5  12   8  127.28   29.28
  -5  12   8  181.62   34.78
   5 -12   8  163.14   31.71
  -5  13   0    0.23   11.18
   5 -13   0   -7.34    6.53
   5  13   0    2.20   10.93
  -5 -13   0    2.18    6.31
  -5 -13  -1  411.11   31.80
  -5  13  -1  386.66   37.81
  -5 -13   1  459.55   31.90
  -5  13   1  435.16   39.64
  -5  13  -1  448.89   30.24
   5  13  -1  395.92   37.24
   5  13   1  444.63   38.05
  -5  13  -2   -2.37   12.16
  -5 -13   2   16.05    9.34
   5  13   2   17.20   12.79
   5  13  -2   55.58   17.32
  -5  13  -2   12.74    8.96
  -5 -13  -2   14.56   10.84
  -5  13   2   -5.84   11.57
   5  13   3   25.44   13.33
  -5  13   3   23.77   13.70
   5  13  -3    7.48   12.02
  -5  13  -3   19.63   14.91
  -5 -13  -3   22.19   12.78
  -5  13   4   66.64   20.66
   5  13   4   59.65   17.27
  -5 -13   4   54.10   18.38
  -5 -13   4   44.44   18.25
   5 -13   4   50.07   17.95
   5 -13   4   71.86   20.80
   5 -13   5  735.62   55.11
   5 -13   5  708.69   52.17
  -5 -13   5  697.36   53.11
  -5  13   5  678.98   52.91
  -5 -13   5  738.54   52.21
   5  13   5  651.04   49.85
  -5 -13   6   40.14   19.56
   5 -13   6   33.63   18.51
   5 -13   6   44.41   18.40
   5  13   6   42.36   19.28
  -5 -13   6   49.75   20.13
  -5  13   6   42.35   21.20
  -5  13   7  116.16   28.95
  -5 -13   7  148.70   30.48
   5 -13   7  153.89   31.94
   5  13   7  155.13   30.89
   5 -13   7  133.01   29.13
  -5  14   0   -6.33   10.74
  -5 -14   0   19.27   11.08
   5  14   0   10.75   11.43
  -5  14  -1  122.30   23.27
   5  14  -1   90.07   21.10
  -5 -14  -1   76.41   17.84
  -5 -14   1  115.91   19.00
   5  14   1   80.11   20.02
  -5  14   1  118.73   23.19
  -5 -14  -2  133.60   21.71
   5  14   2  139.93   24.80
   5  14  -2  181.88   27.56
  -5  14   2  102.25   22.09
  -5  14  -2  128.93   25.04
  -5  14  -2  176.50   21.44
  -5  14   3   66.21   20.57
  -5 -14  -3   99.27   19.26
   5  14   3   88.88   21.16
   5  14  -3   96.83   21.93
  -5  14  -3   77.91   21.28
   5  14   4  380.31   39.08
  -5 -14   4  366.58   38.64
  -5 -14   4  442.26   42.63
   5 -14   4  304.70   38.79
  -5  14   4  314.74   38.49
   5 -14   4  340.42   39.08
   5 -14   5   32.20   18.13
  -5  14   5   -1.64   15.23
   5 -14   5  -18.83   12.16
   5  14   5  -11.60   13.40
  -5 -14   5   -1.22   14.50
  -5 -14   5  -19.00   13.69
   5 -14   6  345.33   44.35
  -5 -14   6  454.87   46.35
   5 -14   6  490.49   50.01
  -5 -14   6  432.37   46.25
   5  14   6  505.07   48.86
  -5  14   6  579.38   52.59
  -5 -14   7  224.03   36.89
   5 -14   7  227.93   36.42
  -5 -14   7  243.96   38.93
   5 -14   7  254.91   39.94
  -5  14   7  224.88   38.31
   5  14   7  273.83   39.63
   5  15   0   16.71   13.59
  -5 -15   0   17.45   11.40
  -5  15   0   19.95   15.94
  -5  15  -1  392.39   40.56
  -5  15   1  339.51   38.40
   5 -15  -1  382.71   28.34
   5  15   1  400.95   38.67
  -5 -15  -1  309.34   31.58
   5  15  -1  306.71   36.00
  -5 -15   1  350.68   31.54
  -5  15   2    4.84   14.98
   5  15   2    7.67   12.14
  -5 -15  -2   -9.77    9.52
   5  15  -2   11.44   14.01
  -5  15  -2   -9.12   13.00
  -5  15   3   40.96   18.54
  -5  15  -3   55.53   19.77
   5  15   3   48.50   17.38
   5  15  -3   22.44   15.40
  -5 -15  -3   47.31   15.87
  -5  15   4   26.21   16.96
  -5 -15  -4   17.36   13.88
   5  15  -4   18.57   16.83
   5  15   4   25.89   16.76
  -5  15  -4   33.14   17.35
   5 -15   5  438.76   47.82
   5  15   5  483.65   46.86
  -5 -15   5  413.44   45.36
   5 -15   5  488.91   48.06
  -5 -15   5  545.41   50.66
  -5  15   5  464.08   48.19
  -5 -15   6   63.22   23.65
   5 -15   6  102.10   25.89
  -5 -15   6   93.17   26.47
   5 -15   6   91.76   25.97
   5  15   6   69.07   23.29
  -5  15   6   63.93   25.66
  -5 -16   0   18.31   12.85
   5  16   0   11.56   13.32
  -5  16   0   10.28   13.95
   5  16  -1   34.44   17.10
  -5  16   1   18.80   15.72
  -5 -16  -1    2.88   11.73
   5  16   1   23.02   15.53
  -5  16  -1    2.35   14.37
   5  16  -2   40.21   18.37
  -5 -16  -2   94.03   19.27
   5  16   2   40.40   17.43
  -5  16  -2   31.15   18.22
  -5  16   2   74.88   21.74
  -5  16   3  337.87   40.29
   5  16   3  350.97   39.62
  -5  16  -3  350.37   41.17
   5  16  -3  432.56   42.46
  -5 -16  -3  298.88   33.89
  -5  16   4  200.98   33.30
   5  16   4  200.87   32.11
  -5  16  -4  228.63   35.42
  -5 -16  -4  227.61   30.29
   5  16  -4  195.13   32.20
  -5 -16  -5   27.26   15.92
  -5  16   5  -12.47   15.05
   5  16   5   19.99   17.45
  -5  16  -5   27.88   19.39
  -5 -16   6  273.29   40.40
  -5  16   6  255.06   41.04
  -5 -16   6  237.19   39.10
   5  16   6  225.87   38.42
   5 -16   6  216.68   35.68
   5 -16   6  203.97   36.66
  -5  17   0    5.45   13.40
   5  17   0   -6.97   13.67
   5  17   1  138.96   27.72
   5  17  -1  167.61   30.35
  -5  17   1  153.71   29.22
  -5  17  -1  178.88   31.85
   5  17  -2   84.57   23.07
  -5  17  -2  105.64   25.26
  -5  17   2   85.24   23.37
  -5 -17  -2   83.99   21.05
   5  17   2   86.34   23.88
  -5  17  -3   20.53   15.31
   5  17   3   30.58   17.12
  -5  17   3   17.56   16.51
  -5 -17  -3   34.73   16.76
   5  17  -3   14.27   15.41
  -5 -17  -4   16.43   14.74
  -5  17  -4    3.02   17.06
   5  17   4   53.82   19.90
  -5  17   4   61.39   22.57
   5  17  -4   43.78   18.34
   5  17   5  392.25   45.78
  -5  17   5  415.67   48.35
  -5  17  -5  272.02   41.21
   5  17  -5  380.45   43.90
  -5 -17  -5  398.33   40.93
  -5  18   0   22.44   18.02
   5  18   0  -10.86   14.08
  -5  18   1   55.41   22.05
   5  18   1   32.60   17.44
   5  18  -1   60.19   21.17
  -5  18  -1   45.25   19.84
  -5  18   2   74.15   23.35
   5  18   2   80.71   22.66
  -5  18  -2   38.61   20.73
   5  18  -2   41.90   20.88
  -5 -18  -2   32.06   16.92
   5  18   3   16.95   17.40
  -5 -18  -3    7.82   14.25
   5  18  -3   27.65   18.77
  -5  18   3    4.05   17.10
  -5  18  -3   -0.12   17.53
   5  18   4  217.27   35.93
   5  18  -4  134.41   30.66
  -5 -18  -4  228.03   33.09
  -5  18  -4  201.22   34.90
  -5  18   4  222.28   38.54
   5  19   0   14.38   17.94
  -5  19   0   29.67   18.46
   5  19  -1  225.25   36.49
  -5  19   1  222.69   37.67
  -5  19  -1  170.85   33.36
   5  19  -2   16.85   17.82
  -5  19  -2    2.95   15.96
   5  19   2   42.84   19.80
  -5  19   2   31.45   20.31
   5  19   3   25.77   20.12
  -5  19  -3   13.65   17.05
  -5 -19  -3   28.35   18.32
  -5  19   3   12.77   18.55
   5  19  -3   42.79   20.79
  -5  20   0   55.59   24.33
   5  20   0  -24.04   16.59
   5  20  -1   -8.59   17.37
  -5  20   1   38.72   23.54
  -5  20  -1   36.64   20.57
   5  20   1    3.33   17.86
  -6   0   0 1470.67   59.94
  -6   0   0 1417.49   62.47
   6   0   1  413.09   19.92
  -6   0  -1  448.87   21.02
  -6   0   1  371.93   22.16
  -6   0   1  443.24   20.28
  -6   0  -1  448.10   22.99
  -6   0   2  598.81   29.09
   6   0   2  583.56   28.93
  -6   0   2  556.22   30.43
  -6   0   3 1415.11   64.26
  -6   0   3 1450.09   66.14
   6   0   3 1371.24   63.70
  -6   0   4  195.55   18.99
   6   0   4  189.24   18.01
  -6   0   4  207.95   18.79
  -6   0   5  319.58   25.17
  -6   0   5  300.51   24.88
   6   0   5  342.25   25.45
   6   0   6   54.39   13.77
  -6   0   6   51.28   13.72
  -6   0   6   76.49   16.00
  -6   0   7   35.72   14.56
   6   0   7   65.84   16.24
  -6   0   8   77.97   20.40
   6   0   8   52.26   17.47
  -6   0   9   95.10   24.34
   6   0   9   93.31   22.81
  -6   0  10   29.15   19.48
   6   0  10   58.89   21.27
  -6  -1   0    9.91    5.23
  -6   1   0   12.32    5.36
  -6   1   0    3.15    3.55
  -6   1   0    7.17    3.53
  -6  -1   0    8.13    5.03
  -6  -1  -1   -1.23    1.65
  -6  -1   1    5.90    5.34
  -6   1  -1   16.21    5.77
  -6   1  -1    7.03    3.76
  -6  -1  -1    5.92    4.13
   6  -1   1   17.06    4.61
   6   1   1    7.27    3.75
  -6   1   1    9.43    4.12
  -6  -1   1    8.57    5.14
  -6   1   1   12.46    5.78
  -6  -1   1    8.18    3.84
   6  -1   2 3697.96  146.21
  -6  -1   2 3623.00  145.76
   6   1   2 3603.78  145.51
  -6  -1   2 3566.77  149.78
  -6   1   2 3524.61  145.85
  -6   1   2 3444.18  148.84
   6   1   3  753.92   38.63
  -6   1   3  741.47   39.70
  -6   1   3  856.87   40.07
  -6  -1   3  775.38   40.65
   6  -1   3  780.69   39.25
  -6  -1   3  733.54   38.76
   6   1   4  161.90   16.24
  -6   1   4  189.67   17.56
   6  -1   4  117.45   15.12
  -6  -1   4  187.72   17.39
  -6   1   4  118.26   15.20
  -6  -1   4  150.21   17.05
  -6   1   5   32.13   10.01
   6  -1   5   39.71   11.34
   6   1   5   36.42   10.47
  -6   1   5   23.79    9.20
  -6  -1   5   29.03   10.10
  -6  -1   5   42.17   11.12
  -6   1   6  614.87   41.00
  -6   1   6  619.91   40.26
  -6  -1   6  610.03   41.31
   6   1   6  584.52   39.54
  -6  -1   6  560.61   39.66
   6  -1   6  670.65   41.61
  -6   1   7   56.85   16.59
  -6  -1   7   47.33   15.55
   6  -1   7   63.52   16.17
   6   1   7   53.75   15.52
   6   1   8  325.98   35.05
   6  -1   8  392.49   37.14
  -6   1   8  361.53   36.83
  -6  -1   8  350.66   36.59
  -6   1   9   60.40   19.69
   6   1   9   37.40   16.83
   6  -1   9   31.35   15.67
  -6  -1   9   31.26   18.62
  -6   1  10    5.87   16.57
   6   1  10   23.51   16.60
   6  -1  10   31.80   17.97
  -6  -1  10   -3.50   15.17
  -6   2   0  127.64    9.51
  -6   2   0  105.93   10.47
   6   2   0  120.13    8.33
  -6  -2   0  103.54    9.87
  -6  -2  -1 1143.19   50.47
  -6  -2   1 1171.08   52.09
   6   2   1 1128.17   48.78
  -6  -2   1 1161.40   51.07
  -6  -2  -1 1156.90   50.35
  -6   2   1 1159.11   52.25
   6  -2   1 1105.18   49.98
  -6   2  -1 1172.85   52.89
  -6   2  -1 1171.33   46.83
  -6  -2   1 1169.44   49.24
  -6  -2   2 1149.25   51.56
   6  -2   2 1188.48   52.35
  -6  -2   2 1114.21   54.06
  -6   2   2 1153.94   53.02
   6   2   2 1171.77   51.41
  -6   2   2 1135.88   51.94
  -6  -2   3  192.58   15.88
   6  -2   3  170.15   15.80
  -6   2   3  189.48   16.40
  -6  -2   3  184.14   17.08
  -6   2   3  190.45   15.82
   6   2   3  199.25   15.78
  -6   2   4  174.98   17.59
  -6   2   4  166.98   16.62
   6  -2   4  176.12   17.55
  -6  -2   4  137.44   16.25
  -6  -2   4  155.92   17.76
   6   2   4  163.24   16.61
   6   2   5   -7.20    5.72
  -6   2   5   10.82    7.73
  -6   2   5   11.41    8.29
  -6  -2   5   -0.48    6.61
  -6  -2   5    6.77    7.67
   6  -2   5   -5.75    5.75
  -6   2   6   82.49   16.78
  -6  -2   6   70.60   16.07
   6   2   6   49.93   13.94
  -6  -2   6   56.24   15.73
  -6   2   6   58.08   13.53
   6  -2   6   58.36   14.94
  -6   2   7    0.06   10.57
   6  -2   7    1.70    9.85
  -6  -2   7   22.76   12.41
   6   2   7    2.57    9.47
  -6  -2   8   39.67   16.46
  -6   2   8   39.28   15.04
   6  -2   8   25.35   14.80
   6   2   8   26.02   15.44
   6  -2   9    3.05   12.05
  -6  -2   9   -7.45   14.38
   6   2   9    1.57   13.78
  -6   2   9   27.42   17.22
   6   2  10   76.62   24.13
  -6   2  10   98.68   26.05
  -6  -2  10   80.76   23.56
   6  -2  10   60.20   22.13
  -6   3   0   73.48    8.73
  -6   3   0   64.31    8.92
  -6  -3   0   72.25    9.17
  -6  -3   0   61.52    7.13
   6   3   0   61.79    7.24
   6   3   1  101.36    8.81
  -6  -3  -1   91.56    8.05
  -6  -3   1  102.74   10.03
  -6  -3   1   79.49    8.59
  -6   3   1  127.72   10.96
  -6  -3   1   99.67   10.52
   6  -3   1  100.95   10.36
  -6   3   1   91.61    9.98
   6  -3   1  105.05    6.27
  -6   3  -1   86.60   10.22
  -6  -3  -1   98.07   10.34
  -6  -3  -2 3675.67  149.56
  -6  -3   2 3626.68  153.31
  -6   3   2 3607.28  151.95
  -6  -3   2 3636.56  149.87
   6   3   2 3725.07  149.67
   6  -3   2 3713.55  150.92
  -6   3   2 3573.39  150.29
  -6   3  -2 3672.65  142.35
  -6   3   3  802.66   42.49
   6  -3   3  871.63   43.13
  -6  -3   3  803.49   44.14
  -6   3   3  851.30   42.17
   6   3   3  871.44   42.30
  -6  -3   3  837.71   42.30
  -6  -3   4  114.58   14.82
  -6  -3   4   81.18   13.80
   6   3   4   83.25   13.03
  -6   3   4   86.71   12.27
   6  -3   4  124.41   15.48
  -6   3   4   74.86   13.41
  -6  -3   5  149.91   18.78
   6  -3   5  165.51   19.41
   6   3   5  164.91   18.79
  -6  -3   5  131.09   19.19
  -6   3   5  126.67   18.29
  -6   3   5  178.43   18.20
   6  -3   6  545.87   37.37
  -6   3   6  449.50   35.18
   6   3   6  561.64   37.38
  -6  -3   6  605.38   38.78
  -6   3   6  463.31   33.98
  -6   3   7    1.04   11.57
  -6   3   7   -2.96    9.21
   6   3   7   16.77   11.06
   6  -3   7    8.94   10.57
  -6  -3   7    7.54   11.21
  -6   3   8  279.68   33.36
   6  -3   8  226.09   30.68
   6   3   8  231.85   29.61
  -6  -3   8  268.50   33.05
  -6  -3   9   81.77   22.27
   6  -3   9   81.64   21.76
  -6   3   9   82.97   23.34
   6   3   9   56.79   19.05
  -6  -3  10   23.97   17.67
   6   3  10  -17.39   14.70
   6  -3  10   16.86   16.83
  -6   3  10    5.88   17.09
   6   4   0 1011.17   45.73
  -6   4   0  985.05   47.23
  -6  -4   0 1045.61   46.78
  -6   4   0 1024.12   47.63
  -6  -4   0  981.06   44.33
  -6  -4  -1  956.06   44.95
  -6  -4   1  951.51   44.72
  -6   4  -1  957.95   46.47
  -6   4   1 1019.16   45.71
   6   4   1 1009.94   44.35
   6  -4   1  931.00   43.85
   6  -4   1  919.08   45.55
  -6   4   1  924.47   45.46
  -6  -4  -1  963.90   41.50
   6   4   2  113.46   11.42
  -6  -4   2   92.30   11.34
   6  -4   2   97.42   12.13
  -6  -4  -2   99.92    8.52
  -6  -4   2   95.59   12.00
  -6   4   2  117.86   11.02
  -6  -4   2   98.58   11.43
  -6   4   2  106.88   12.32
  -6  -4   3 1487.36   68.40
  -6  -4   3 1494.94   70.74
   6  -4   3 1439.38   68.83
   6   4   3 1499.90   68.25
  -6   4   3 1492.97   67.43
  -6   4   3 1470.16   69.61
  -6  -4   4    1.19    6.33
  -6   4   4   12.44    6.20
   6   4   4   11.01    7.42
   6  -4   4   -3.09    5.98
  -6  -4   4    6.72    7.14
  -6   4   4    5.62    6.29
  -6  -4   5  213.14   22.02
  -6   4   5  185.99   18.51
   6   4   5  153.41   19.45
  -6  -4   5  146.68   20.99
   6  -4   5  170.05   20.49
  -6   4   5  177.12   21.03
   6  -4   6   39.39   14.06
  -6  -4   6   54.58   15.49
   6   4   6   41.44   13.27
  -6   4   6   35.39   10.92
  -6   4   6   55.46   15.44
  -6   4   7   11.83    9.78
   6  -4   7   16.55   11.79
  -6   4   7   18.26   13.23
  -6  -4   7   14.70   13.03
   6   4   7   -7.68    8.31
   6  -4   8   12.42   12.88
  -6  -4   8   16.90   15.15
  -6   4   8   21.05   14.92
   6   4   8   22.62   14.03
   6   4   9   82.52   21.78
  -6   4   9  117.47   26.45
  -6  -4   9   69.87   22.02
   6  -4   9   96.09   23.23
   6  -4  10   21.55   19.78
  -6   4  10   18.39   18.15
   6   4  10   12.94   19.40
  -6  -4  10   24.72   16.78
  -6   5   0  112.04   11.98
  -6  -5   0  129.45    9.72
   6   5   0  112.87   11.75
  -6  -5   0  116.06   12.31
  -6   5   0  145.94   14.29
  -6  -5   1  745.21   36.03
  -6  -5   1  756.49   37.25
  -6  -5  -1  760.35   32.21
  -6   5  -1  751.92   38.46
  -6  -5   1  706.47   37.16
  -6   5   1  751.74   37.03
  -6  -5  -1  699.01   37.14
  -6   5   1  688.33   38.04
   6  -5   1  755.76   39.03
   6   5   1  774.31   37.25
   6  -5   1  724.94   37.13
  -6  -5   2 1564.98   71.81
  -6  -5  -2 1603.38   66.35
  -6   5   2 1572.72   70.29
  -6   5   2 1556.73   72.63
  -6  -5   2 1614.00   72.84
   6   5   2 1601.29   71.39
   6  -5   2 1596.63   73.19
  -6  -5   3  343.80   25.49
   6  -5   3  345.47   25.13
  -6  -5   3  392.80   25.51
   6   5   3  381.72   24.86
  -6   5   3  381.70   26.03
  -6   5   3  400.22   23.10
   6   5   4    1.78    6.33
  -6   5   4    6.97    5.31
  -6  -5   4   -1.09    6.10
  -6   5   4    2.43    7.19
   6  -5   4   -0.46    6.05
  -6  -5   4    6.06    7.88
  -6   5   5   11.81    7.51
  -6  -5   5   23.75   10.47
   6  -5   5    7.83    8.86
   6   5   5   16.21    9.69
  -6   5   5   35.02   11.97
   6  -5   6  754.80   49.77
  -6   5   6  853.24   51.29
  -6   5   6  811.57   46.23
  -6  -5   6  800.24   50.00
   6   5   6  843.36   50.46
  -6   5   7   35.06   15.61
   6  -5   7   32.62   14.34
   6   5   7   36.56   14.65
  -6  -5   7   50.32   16.03
   6  -5   8  484.61   44.17
  -6  -5   8  531.08   43.64
  -6   5   8  524.17   46.62
   6   5   8  529.16   42.77
   6   5   9    2.04   12.49
  -6   5   9   16.61   18.58
  -6  -5   9    1.86   15.07
   6  -5   9   22.22   15.36
  -6   5  10   31.59   18.84
  -6  -5  10    2.33   18.23
   6   5  10   10.90   16.80
   6  -5  10  -10.98   15.26
  -6  -6   0 1075.99   50.54
  -6   6   0 1028.30   50.55
  -6  -6   0 1051.50   47.00
   6   6   0 1065.68   51.22
  -6   6   0 1130.39   53.43
  -6  -6  -1  736.28   38.35
  -6  -6   1  729.65   37.31
  -6  -6   1  764.17   39.04
  -6  -6   1  824.96   38.47
   6  -6   1  676.29   39.29
  -6   6  -1  694.06   38.25
  -6  -6   1  714.94   36.33
  -6   6   1  738.69   37.00
  -6   6   1  725.12   39.88
   6   6   1  740.96   38.12
   6  -6   1  717.57   38.34
  -6  -6  -1  741.45   31.48
   6   6   2  312.30   22.13
  -6   6   2  266.93   23.25
   6  -6   2  307.74   22.91
  -6  -6   2  304.45   20.89
  -6   6   2  283.30   18.47
  -6  -6   2  286.25   21.50
  -6  -6   3  834.82   43.20
   6  -6   3  754.78   42.88
   6   6   3  774.43   41.82
  -6   6   3  681.50   42.15
  -6   6   3  805.25   38.69
  -6  -6   3  730.17   41.55
  -6  -6  -3  768.20   34.47
  -6   6   4   26.01    7.18
   6  -6   4    9.95    7.61
  -6   6   4   15.43    9.15
  -6  -6   4    7.51    7.17
  -6  -6   4   22.73    9.92
   6   6   4   17.02    8.81
  -6  -6   5   74.85   15.93
   6   6   5   88.01   16.48
  -6   6   5  119.54   19.58
  -6   6   5  112.51   13.93
   6  -6   5   78.85   16.47
  -6   6   6  221.02   27.48
   6  -6   6  236.51   27.57
  -6   6   6  251.86   22.29
   6   6   6  217.16   25.94
  -6  -6   6  253.27   28.15
  -6  -6   7   18.62   13.35
  -6   6   7   17.02   13.42
   6   6   7   -2.45   10.24
   6  -6   7   -7.48   10.57
  -6   6   8   21.47   15.65
  -6  -6   8    4.43   14.52
   6  -6   8   14.62   12.01
   6   6   8    5.42   13.10
  -6  -6   9   76.03   23.96
   6  -6   9   29.67   18.48
   6   6   9   52.74   20.48
  -6   6   9   93.23   25.05
   6   7   0 1229.42   61.85
  -6  -7   0 1363.79   61.35
  -6   7   0 1295.41   64.10
  -6  -7   0 1316.45   56.75
  -6   7   0 1332.99   61.21
  -6   7  -1  605.42   32.43
  -6   7  -1  561.72   33.94
  -6  -7  -1  590.77   32.48
  -6   7   1  509.83   33.59
   6   7  -1  565.84   32.66
  -6   7   1  598.43   30.59
  -6  -7   1  463.01   29.49
   6   7   1  554.79   32.39
  -6  -7   1  520.67   28.93
  -6  -7   2 3035.41  127.89
  -6  -7   2 3120.23  128.81
   6   7   2 3058.51  132.04
  -6  -7   2 2933.35  131.53
   6  -7   2 3170.25  135.02
  -6  -7   2 3143.20  133.62
  -6   7   2 3109.38  129.32
   6  -7   2 3123.18  129.52
  -6   7   2 2932.62  133.57
  -6   7   3  106.88   11.37
  -6  -7   3  126.05   16.30
   6  -7   3  103.76   16.43
   6   7   3  145.22   17.09
  -6  -7   3  137.97   17.34
  -6   7   3  117.38   17.39
   6  -7   4  114.10   18.36
  -6   7   4   78.13   16.94
  -6   7   4   93.94   11.58
  -6  -7  -4  123.96    9.55
  -6  -7   4   97.63   16.55
   6   7   4  111.18   16.87
  -6   7   5  219.34   19.20
  -6  -7   5  232.88   25.33
   6  -7   5  271.88   27.16
   6   7   5  257.09   26.27
  -6   7   5  215.91   26.97
  -6  -7   6  417.52   34.12
  -6   7   6  367.05   35.43
   6  -7   6  434.36   34.96
   6   7   6  306.17   32.17
  -6   7   6  405.95   27.52
  -6   7   7    8.76   13.32
  -6  -7   7   15.33   13.95
   6  -7   7   15.31   13.17
   6   7   7   -5.55   10.76
  -6  -7   8  177.09   30.41
  -6   7   8  253.98   34.70
   6  -7   8  321.33   36.89
   6   7   8  192.02   30.25
  -6  -7   9  151.70   30.32
   6   7   9  142.90   27.51
   6  -7   9   97.05   26.22
  -6   7   9   81.88   24.59
  -6   8   0  503.04   28.70
  -6   8   0  490.83   32.17
  -6  -8   0  456.27   28.83
   6   8   0  465.41   30.30
  -6  -8  -1 1182.44   60.05
  -6   8  -1 1243.43   60.48
   6  -8   1 1243.99   52.55
   6   8  -1 1260.97   62.39
  -6   8   1 1264.52   63.97
  -6   8  -1 1292.41   64.23
  -6   8   1 1235.49   58.33
   6   8   1 1286.93   62.10
  -6  -8   2  642.86   38.25
  -6   8   2  718.23   41.94
  -6   8   2  693.80   34.77
   6  -8   2  713.43   42.17
   6   8   2  687.60   39.68
  -6  -8   2  715.43   40.97
   6  -8   2  683.28   39.70
  -6  -8   2  585.56   35.92
  -6  -8   3  450.44   32.27
   6   8   3  486.37   32.46
  -6   8   3  501.24   33.65
   6  -8   3  482.14   34.00
  -6   8   3  446.27   25.81
  -6  -8   3  498.13   29.57
   6   8   4  112.57   17.99
  -6   8   4  109.16   11.91
   6  -8   4   93.96   18.09
  -6  -8   4  130.02   19.55
  -6   8   4  122.63   19.75
  -6   8   5   63.24   16.88
  -6  -8   5   15.29   12.28
   6  -8   5   57.91   15.55
   6   8   5   13.17   11.03
  -6   8   5   68.90   10.56
  -6   8   6   95.72   22.42
  -6  -8   6   37.72   15.40
   6   8   6   46.55   15.78
   6  -8   6   85.05   19.00
  -6   8   7   -6.18   11.68
  -6  -8   7    8.62   13.71
   6  -8   7   18.50   13.89
   6   8   7  -12.57   10.82
  -6  -8   8   26.69   17.96
   6  -8   8   12.12   15.02
   6   8   8   10.56   14.38
  -6   8   8   20.24   16.88
   6   8   9   50.14   21.16
  -6   8   9   45.02   20.37
   6  -8   9   27.19   18.97
  -6  -8   9   66.31   22.34
  -6   9   0   26.13   11.02
  -6   9   0   24.87    7.73
   6   9   0   25.99    9.20
  -6  -9   0   24.80    8.97
  -6   9  -1  429.66   31.18
   6   9   1  414.57   29.15
  -6   9   1  394.98   30.70
  -6   9   1  405.23   25.04
  -6   9  -1  409.01   27.27
   6   9  -1  417.06   29.54
  -6  -9  -1  394.51   27.97
   6  -9   1  434.38   21.77
   6   9   2 1707.29   84.27
  -6  -9   2 1892.76   83.66
  -6  -9   2 1788.56   80.89
  -6  -9   2 1874.74   86.80
  -6   9   2 1794.27   78.51
   6  -9   2 1700.60   83.53
   6  -9   2 1643.62   86.32
  -6   9   2 1856.89   87.21
  -6  -9  -2 1720.51   82.87
  -6  -9   3  267.43   26.51
  -6   9   3  286.20   17.93
  -6   9   3  257.28   26.99
   6  -9   3  280.19   27.89
  -6  -9   3  259.41   25.70
  -6  -9   3  299.39   21.89
   6  -9   3  331.47   28.74
   6   9   3  232.67   24.54
   6  -9   4    4.55    9.93
  -6   9   4    4.76    4.68
  -6   9   4  -10.56   11.31
  -6  -9   4    6.55   10.75
   6   9   4    4.01    9.38
  -6  -9   5   -1.99    9.84
  -6   9   5    5.74   12.62
   6   9   5    3.81    9.98
   6  -9   5    0.24   10.20
  -6  -9   6  478.48   38.58
   6   9   6  460.93   40.09
   6  -9   6  446.83   41.09
  -6   9   6  383.68   38.91
  -6   9   7   32.15   16.75
   6  -9   7    6.41   11.81
  -6  -9   7   -0.74   14.35
   6   9   7   14.29   13.21
   6   9   8  358.78   41.37
   6  -9   8  390.80   42.60
  -6   9   8  379.62   43.04
  -6  -9   8  366.62   41.91
  -6   9   9   15.36   19.54
  -6  -9   9    7.36   18.80
   6  -9   9   16.91   20.99
   6   9   9   26.45   19.85
  -6 -10   0 1012.71   51.31
   6  10   0 1016.07   54.23
  -6  10   0  818.96   53.30
  -6  10   0 1027.48   50.18
  -6  10   1  609.71   42.40
  -6 -10   1  642.85   37.83
   6  10  -1  635.52   41.11
   6  10   1  676.73   41.61
  -6  10  -1  683.07   38.65
  -6 -10  -1  634.80   39.00
   6 -10   1  705.18   32.63
  -6  10  -1  634.27   42.82
  -6  10   1  702.45   36.41
  -6 -10  -2  781.79   46.46
  -6  10   2  865.04   41.03
  -6  10   2  843.05   50.70
  -6 -10   2  851.82   45.34
   6  10   2  779.42   47.91
  -6 -10   3  710.59   43.68
  -6 -10   3  781.21   40.42
   6  10   3  682.17   43.58
   6 -10   3  676.17   46.05
   6 -10   3  665.01   43.69
  -6 -10   3  614.39   43.40
  -6  10   3  629.64   44.26
  -6 -10   4   45.01   15.18
   6 -10   4   31.28   12.89
   6 -10   4   24.93   13.31
   6  10   4   29.08   12.18
  -6  10   4   34.49   15.09
   6  10   5   71.59   18.15
  -6  10   5   96.09   21.81
  -6 -10   5   93.74   19.81
   6 -10   5   70.12   18.30
  -6  10   6   14.49   14.33
  -6 -10   6   29.05   16.19
   6  10   6   10.83   13.56
   6 -10   6   20.35   15.59
  -6  10   7   15.16   17.98
  -6 -10   7   38.56   18.93
   6  10   7   -2.24   13.71
   6 -10   7   26.58   15.92
   6 -10   8    8.79   15.46
   6  10   8    8.08   15.80
  -6  10   8   34.67   19.20
  -6 -10   8   -7.83   16.30
  -6  11   0  308.99   30.54
  -6  11   0  322.03   23.18
   6  11   0  273.92   27.52
  -6 -11   0  357.35   26.32
  -6  11  -1  187.77   24.74
  -6 -11  -1  192.37   21.55
  -6  11   1  202.15   16.89
   6  11  -1  195.40   23.74
   6 -11   1  197.83   15.00
  -6 -11   1  219.11   21.49
  -6  11  -1  219.58   20.45
  -6  11   1  235.36   27.00
   6  11   1  184.49   23.06
   6  11  -2 1751.42   89.48
   6  11   2 1736.99   88.55
  -6  11   2 1807.78   91.30
  -6 -11  -2 1879.84   86.94
  -6 -11   2 1833.14   84.29
  -6  11  -2 1768.95   90.97
  -6 -11   3  632.48   37.01
   6 -11   3  535.72   42.45
  -6  11   3  636.72   44.09
  -6 -11   3  617.79   41.77
   6  11   3  602.82   41.88
  -6 -11   3  636.81   43.67
   6 -11   3  578.95   42.10
   6 -11   4   37.61   15.15
   6  11   4   99.56   19.82
   6 -11   4   53.44   16.92
  -6  11   4   50.65   16.99
  -6 -11   4   41.71   15.39
  -6 -11   4   57.38   16.74
   6 -11   5   90.54   20.62
   6  11   5  106.78   21.66
  -6  11   5  123.45   23.87
  -6 -11   5  135.93   24.01
   6 -11   6  294.04   35.82
  -6 -11   6  328.70   36.50
  -6  11   6  287.01   36.37
   6  11   6  301.60   34.70
  -6  11   7   39.21   19.85
  -6 -11   7   41.53   19.86
   6 -11   7   35.18   17.13
   6  11   7   37.46   18.97
   6  11   8  212.53   33.62
  -6 -11   8  153.80   31.79
  -6  11   8  223.65   37.34
   6 -11   8  182.41   33.21
  -6  12   0   59.96   11.91
  -6 -12   0   48.96   12.53
   6  12   0   54.85   15.95
  -6  12   0   14.86   12.44
  -6  12  -1  537.99   34.63
  -6 -12  -1  546.49   37.23
  -6 -12   1  605.88   37.13
  -6  12   1  491.03   39.47
   6  12   1  576.64   40.20
   6  12  -1  533.17   40.01
  -6  12  -1  578.07   42.48
  -6 -12   2  244.90   23.17
   6  12  -2  215.54   26.93
  -6  12   2  212.73   27.92
   6  12   2  195.44   25.29
  -6 -12  -2  225.75   24.42
  -6  12  -2  185.89   21.44
  -6  12  -2  205.46   28.28
   6  12   3  328.07   32.47
   6 -12   3  328.19   35.41
   6 -12   3  287.35   32.39
  -6 -12   3  330.31   32.96
  -6 -12   3  344.40   34.32
  -6 -12   3  358.85   26.62
  -6  12   3  340.69   34.59
  -6 -12   4  202.36   28.08
  -6  12   4  200.50   29.88
   6  12   4  210.60   28.54
   6 -12   4  232.93   30.31
  -6 -12   4  215.52   29.21
   6 -12   4  223.88   30.51
  -6  12   5   24.28   17.27
   6  12   5   25.09   14.15
  -6 -12   5   24.09   14.33
   6 -12   5   57.76   17.71
   6 -12   5   29.34   15.51
  -6 -12   5   20.67   14.41
  -6  12   6   48.01   20.79
  -6 -12   6   32.93   18.89
   6 -12   6   53.87   20.15
   6  12   6   72.11   21.78
   6 -12   6   53.05   19.42
  -6 -12   7   18.02   18.72
   6 -12   7    6.15   15.32
  -6  12   7   16.02   18.34
   6  12   7   16.19   17.51
   6 -12   8   99.96   27.31
  -6 -12   8   61.86   24.87
   6  12   8  170.84   32.55
  -6  12   8  126.52   30.95
   6  13   0   57.42   15.78
  -6 -13   0   25.75   10.68
  -6  13   0   62.38   17.92
   6 -13   0   39.75    9.97
  -6 -13   1  319.03   27.54
  -6  13   1  258.97   31.66
   6  13   1  242.23   29.43
  -6 -13  -1  310.30   28.66
  -6  13  -1  267.09   24.33
  -6  13  -1  260.17   31.83
   6  13  -1  289.27   31.31
  -6  13  -2 1101.40   59.46
   6  13  -2 1132.19   65.31
  -6  13  -2 1180.09   67.50
   6  13   2 1077.40   63.64
  -6  13   2  990.72   64.29
  -6 -13  -2  970.82   58.96
  -6 -13   2 1096.35   57.92
  -6  13  -3  428.39   39.79
   6  13  -3  410.94   38.42
  -6  13   3  503.78   42.69
  -6 -13  -3  412.83   34.19
   6  13   3  451.06   39.19
   6 -13   4   14.65   14.14
  -6 -13   4   35.50   16.72
   6 -13   4   28.31   15.45
  -6 -13   4   -4.96   12.00
  -6  13   4   31.74   18.44
   6  13   4   24.89   14.41
   6 -13   5   28.02   16.24
  -6 -13   5   17.21   16.13
  -6  13   5   27.22   17.20
   6  13   5   17.06   13.70
   6 -13   5   32.15   16.32
  -6 -13   5   20.55   15.58
  -6 -13   6  226.88   34.34
   6 -13   6  227.53   35.52
  -6  13   6  274.79   39.03
  -6 -13   6  295.14   37.91
   6 -13   6  209.45   32.74
   6  13   6  272.80   35.75
  -6 -13   7    7.39   16.31
   6 -13   7   12.03   16.67
  -6  13   7    2.81   19.00
   6  13   7  -15.86   14.20
   6 -13   7    5.42   14.84
  -6  14   0  570.40   44.36
   6  14   0  521.73   41.83
  -6  14  -1  314.25   35.90
  -6  14   1  287.43   34.84
   6  14  -1  317.92   34.78
  -6 -14  -1  361.00   32.01
  -6 -14   1  317.14   29.49
   6  14   1  334.54   34.52
  -6  14  -2  221.69   30.92
  -6 -14  -2  175.22   24.59
   6  14  -2  186.30   27.96
   6  14   2  184.61   27.27
  -6  14   2  194.21   29.86
  -6 -14   2  229.16   24.01
  -6  14  -2  158.62   22.32
   6  14  -3  384.25   38.98
   6  14   3  430.04   39.76
  -6 -14  -3  425.00   37.05
  -6  14  -3  425.64   42.13
  -6  14   3  421.16   42.06
   6  14   4   14.74   12.34
  -6 -14   4   -2.05   13.41
  -6 -14  -4    0.24   11.70
  -6  14   4   15.37   14.93
  -6 -14   4    6.66   13.23
   6 -14   5  146.16   28.99
   6  14   5  174.82   28.73
  -6 -14   5  110.77   26.01
  -6 -14   5  172.85   30.47
   6 -14   5  131.73   26.85
  -6  14   5  191.64   33.08
  -6  14   6   34.68   19.91
   6  14   6   24.17   17.65
  -6 -14   6   37.07   20.67
   6 -14   6   28.53   20.27
   6 -14   6   22.24   17.76
  -6 -14   6   16.78   19.44
  -6 -14   7    9.58   16.95
   6 -14   7   23.57   17.83
   6  14   7   -5.56   15.95
  -6 -14   7   19.73   19.45
  -6  14   7   16.13   20.23
   6 -14   7  -15.86   13.73
   6  15   0   22.97   13.14
  -6  15   0    4.19   14.13
  -6 -15   0   30.19   11.13
  -6 -15  -1  121.46   21.83
   6  15   1  116.90   22.99
   6  15  -1  132.11   24.37
  -6  15  -1  127.29   25.91
  -6  15   1  127.86   26.05
  -6 -15   1  119.97   20.79
  -6  15   2  853.85   59.06
   6  15  -2  873.24   58.25
   6  15   2  828.32   56.49
  -6 -15  -2  819.15   52.46
  -6  15  -2  804.74   58.42
  -6  15   3   94.08   23.47
   6  15   3  106.70   23.01
  -6 -15  -3   75.84   18.84
   6  15  -3   94.54   22.20
  -6  15  -3  102.45   20.23
  -6  15  -3  131.72   26.01
  -6 -15  -4   -4.60   11.51
  -6  15   4   -0.94   15.16
   6  15  -4   -4.70   11.66
  -6  15  -4   -5.77   13.28
   6  15   4    1.70   13.21
  -6 -15   5   -2.06   16.60
   6  15   5   35.92   16.91
   6 -15   5   49.82   19.62
  -6 -15   5   21.28   19.38
   6 -15   5   42.64   19.97
  -6  15   5   35.56   20.58
   6 -15   6  220.13   37.56
  -6 -15   6  284.50   39.29
   6 -15   6  266.19   39.22
   6  15   6  278.07   38.96
  -6 -15   6  216.80   36.66
  -6  15   6  268.24   41.04
  -6  16   0   49.96   18.83
  -6 -16   0   37.39   15.16
   6  16   0   72.97   20.31
   6  16  -1  325.61   37.51
  -6 -16  -1  350.93   33.94
  -6  16  -1  296.97   38.35
  -6  16   1  321.86   38.97
   6  16   1  303.81   36.12
  -6 -16  -2  212.79   28.32
   6  16   2  188.81   31.02
   6  16  -2  191.88   30.50
  -6  16   2  275.78   36.48
  -6  16  -2  176.40   32.24
  -6 -16  -3  134.75   24.23
   6  16   3  180.29   29.20
  -6  16   3  141.85   28.65
  -6  16  -3  140.69   29.63
   6  16  -3  147.60   27.80
  -6 -16  -4   41.27   16.02
   6  16   4   41.48   19.55
  -6  16  -4   11.48   16.09
   6  16  -4   88.26   21.69
  -6  16   4   30.98   20.66
  -6  16  -5    7.71   18.29
   6  16   5  -10.40   13.51
  -6 -16  -5   32.62   15.82
  -6  16   5   16.64   20.81
   6  16   6   29.94   22.76
  -6  16   6   42.84   23.02
  -6 -16   6   44.71   22.64
   6 -16   6   24.26   21.30
  -6 -16   6    9.38   18.59
   6 -16   6   57.52   22.75
   6  17   0  136.74   28.38
  -6  17   0  165.38   31.08
  -6  17   1   50.91   20.81
  -6 -17  -1   52.41   16.87
   6  17  -1   85.34   22.28
  -6  17  -1   71.90   22.90
   6  17   1   49.80   20.52
   6  17  -2  560.16   51.82
  -6 -17  -2  628.94   46.39
   6  17   2  558.27   50.74
  -6  17   2  709.16   54.70
  -6  17  -2  679.14   54.04
   6  17  -3   93.24   23.15
  -6 -17  -3   80.72   20.85
   6  17   3  125.05   27.33
  -6  17  -3  101.50   26.74
  -6  17   3   94.41   24.75
  -6  17   4   12.88   17.92
  -6 -17  -4   -1.05   14.40
   6  17  -4   37.28   17.27
   6  17   4   45.10   19.69
  -6  17  -4   39.94   20.66
   6  17   5   33.09   18.98
  -6  17   5   47.43   21.13
   6  17  -5   24.68   18.20
  -6 -17  -5   19.62   16.49
  -6  17  -5   16.21   19.24
  -6  18   0  272.11   40.49
   6  18   0  195.53   32.86
   6  18   1  123.03   26.80
  -6  18   1  171.70   31.51
  -6  18  -1  120.84   29.30
   6  18  -1  179.81   32.36
  -6  18  -2  105.11   27.69
   6  18  -2  105.84   27.48
  -6  18   2   78.80   24.52
   6  18   2   97.62   24.93
  -6 -18  -2   74.91   21.78
  -6  18   3  171.57   32.68
   6  18  -3  220.34   35.20
   6  18   3  151.31   30.06
  -6  18  -3  116.36   28.82
  -6 -18  -3  149.27   26.79
   6  18   4   16.55   18.36
   6  18  -4   16.19   16.49
  -6 -18  -4   -2.16   14.68
  -6  18   4   35.59   20.71
  -6  18  -4   -3.23   15.50
  -6  19   0    1.26   18.54
   6  19   0   32.37   19.25
   6  19   1  152.78   29.59
   6  19  -1  126.73   28.10
  -6  19  -1  109.54   27.96
  -6  19   1   69.57   23.71
  -6  19   2  343.63   45.88
   6  19  -2  357.56   44.11
  -6 -19  -2  307.69   37.13
   6  19   2  333.86   42.95
  -6  19  -2  297.40   43.00
   6  19  -3    5.04   17.27
  -6  19   3   50.55   22.89
  -6  19  -3   14.72   19.52
  -6 -19  -3   45.49   18.09
   6  19   3  -11.99   16.76
   6  20   0  105.26   27.93
  -6  20   0  101.18   29.13
  -7   0   0   -0.21    4.22
  -7   0   0   -3.14    4.61
   7   0   1 5008.52  193.99
  -7   0  -1 4816.41  199.64
  -7   0   1 4856.26  200.08
  -7   0   1 4906.74  193.96
  -7   0  -1 4835.70  191.73
  -7   0   2    2.73    2.14
  -7   0   2    1.19    5.05
   7   0   2    6.24    4.99
   7   0   3   11.76    6.30
  -7   0   3    8.09    6.20
  -7   0   3    7.87    6.23
   7   0   4 1084.17   52.48
  -7   0   4  995.14   53.46
  -7   0   4 1062.18   52.80
   7   0   5 1407.85   69.69
  -7   0   5 1470.24   72.21
  -7   0   5 1366.65   69.68
   7   0   6   61.36   14.81
  -7   0   6   62.95   14.83
  -7   0   6   75.53   16.23
  -7   0   7   30.25   14.35
  -7   0   7   20.49   12.96
   7   0   7   40.21   14.25
  -7   0   8   65.26   18.27
   7   0   8   88.16   20.17
   7   0   9  626.26   47.83
  -7   0   9  592.15   48.94
   7   0  10  140.42   28.12
  -7   0  10  118.90   27.52
  -7  -1   0   -1.22    4.55
  -7  -1   0   -2.55    4.92
  -7   1   0   -4.75    3.30
  -7   1   0   -2.23    3.71
  -7   1   0   -9.55    4.30
  -7   1   1  920.47   40.61
  -7   1  -1  958.30   44.56
  -7  -1  -1  961.96   42.17
  -7  -1   1  947.53   43.09
   7   1   1  955.29   40.02
  -7   1  -1  960.15   40.31
  -7  -1  -1  901.65   43.10
   7  -1   1  929.96   40.78
  -7  -1   1  944.20   40.11
  -7   1   1  923.38   44.03
  -7  -1   1  959.16   44.13
   7   1   2  176.65   13.12
   7  -1   2  188.45   13.39
  -7   1  -2  181.06   11.77
  -7   1   2  208.82   13.96
  -7  -1   2  172.62   14.95
  -7   1   2  174.68   14.80
   7  -1   3    3.38    5.52
  -7   1   3   -2.57    4.79
  -7   1   3    3.72    5.57
   7   1   3    5.44    5.27
  -7  -1   3    0.01    5.43
  -7  -1   3   11.64    6.34
  -7  -1   4  669.30   36.27
  -7   1   4  609.85   36.14
  -7   1   4  624.14   35.72
   7   1   4  597.07   35.10
   7  -1   4  632.87   35.94
  -7  -1   4  621.50   36.99
  -7  -1   5  583.40   37.75
   7   1   5  596.28   36.35
   7  -1   5  582.38   36.45
  -7  -1   5  630.65   37.62
  -7   1   5  545.75   36.35
  -7   1   5  586.63   37.15
   7   1   6  615.39   39.66
  -7   1   6  552.57   39.25
  -7  -1   6  544.23   38.85
  -7   1   6  655.03   40.97
  -7  -1   6  589.49   40.33
   7  -1   6  602.58   39.78
  -7   1   7   27.57   13.08
   7   1   7    9.37   11.03
   7  -1   7    8.96   10.90
  -7   1   7    7.15   10.25
  -7  -1   7    2.65   10.52
   7  -1   8  109.32   22.06
  -7   1   8  120.64   23.22
   7   1   8  113.56   22.91
  -7  -1   8  115.44   22.94
   7  -1   9  247.76   33.64
  -7  -1   9  229.68   33.22
   7   1   9  289.37   35.15
  -7   1   9  228.01   33.91
  -7  -1  10  159.06   29.58
   7   1  10   98.99   24.88
   7  -1  10  103.89   26.24
  -7   1  10   90.04   25.61
   7   2   0    5.23    3.31
  -7   2   0    9.73    5.64
  -7   2   0   -1.78    4.42
  -7  -2   0   -0.94    2.15
  -7  -2   0   -1.67    4.76
  -7  -2   1 2078.39   89.00
  -7  -2  -1 2050.73   86.28
   7  -2   1 2056.26   86.35
  -7  -2  -1 2123.80   87.78
  -7   2   1 2143.63   89.87
  -7  -2   1 2142.26   85.24
  -7   2  -1 2020.33   89.74
  -7   2  -1 2113.21   82.85
   7   2   1 1966.57   84.48
  -7  -2   1 2083.82   87.10
  -7   2   2   35.30    7.51
  -7   2  -2   23.35    4.46
  -7   2   2   37.64    7.46
   7  -2   2   37.33    7.32
  -7  -2  -2   25.07    6.32
   7   2   2   21.18    6.17
  -7  -2   2   26.46    7.46
  -7  -2   3    8.73    6.18
  -7   2   3    7.01    6.75
   7  -2   3    5.48    5.72
  -7   2   3    6.78    5.75
   7   2   3    1.08    5.80
  -7  -2   3    5.42    6.30
   7  -2   4  107.62   14.34
  -7  -2   4   88.47   14.36
  -7   2   4   89.73   13.25
  -7   2   4  105.78   14.51
   7   2   4   88.26   13.45
  -7  -2   4  114.70   14.55
  -7  -2   5 1090.84   56.12
   7  -2   5 1080.29   55.77
  -7  -2   5  840.97   54.71
   7   2   5 1081.03   55.39
  -7   2   5 1043.15   55.28
  -7   2   5 1129.86   56.60
  -7  -2   6  389.37   32.51
   7  -2   6  366.44   30.40
  -7  -2   6  428.83   32.81
  -7   2   6  442.24   32.98
   7   2   6  418.82   31.96
  -7   2   6  388.02   30.76
  -7   2   7   83.34   17.81
   7  -2   7   55.85   16.33
  -7   2   7   76.95   17.83
  -7  -2   7   73.43   18.37
   7   2   7   69.20   16.95
  -7   2   8  102.12   22.38
   7  -2   8  150.68   25.20
  -7  -2   8  148.47   25.82
   7   2   8  115.33   23.12
   7   2   9  476.52   44.43
  -7  -2   9  480.47   46.28
   7  -2   9  504.09   45.99
  -7   2   9  525.49   47.71
  -7  -2  10   37.43   18.98
   7   2  10   53.74   20.62
   7  -2  10    5.76   17.83
  -7   2  10   16.56   16.99
  -7  -3   0    7.20    5.40
  -7   3   0    0.95    5.50
   7   3   0    4.33    4.00
  -7   3   0    0.12    1.91
  -7  -3   0   -3.46    3.86
  -7  -3  -1  306.33   17.00
   7   3   1  304.89   16.76
  -7  -3   1  297.94   19.27
  -7   3   1  297.82   19.41
  -7   3   1  276.20   18.06
  -7  -3   1  304.48   18.80
  -7  -3  -1  300.41   18.96
  -7  -3   1  312.40   17.42
  -7   3  -1  287.70   19.88
   7  -3   1  302.52   18.53
  -7   3  -2   94.79    6.34
  -7  -3  -2   93.57    9.07
  -7   3   2  100.12   10.95
   7   3   2   75.98    9.41
  -7   3   2   91.85   10.69
  -7  -3   2   89.63   11.67
   7  -3   2   99.18   11.42
   7  -3   3  165.89   15.99
  -7   3   3  191.82   15.78
  -7  -3   3  192.73   15.68
   7   3   3  156.02   14.94
  -7  -3   3  174.27   17.34
  -7   3   3  181.52   16.85
   7   3   4  803.04   43.31
  -7   3   4  784.14   44.21
  -7  -3   4  779.11   45.76
   7  -3   4  853.22   44.70
  -7  -3   4  763.58   43.44
  -7   3   4  898.60   44.28
  -7  -3   5  518.80   34.42
   7  -3   5  431.02   30.54
  -7   3   5  454.93   29.86
   7   3   5  430.97   29.91
  -7   3   5  336.68   28.73
  -7  -3   5  429.41   30.38
  -7   3   6  593.06   39.06
   7   3   6  599.07   40.25
  -7   3   6  628.21   41.45
  -7  -3   6  620.53   41.27
   7  -3   6  625.52   41.19
  -7  -3   6  613.20   42.97
  -7   3   7  143.26   23.70
  -7   3   7  131.46   20.92
   7  -3   7  158.24   23.94
   7   3   7  153.07   23.68
  -7  -3   7  153.25   24.26
  -7  -3   8  179.07   28.28
   7  -3   8  187.36   27.09
   7   3   8  116.97   23.22
  -7   3   8   98.29   22.42
   7   3   9  309.10   37.03
  -7  -3   9  298.66   38.06
   7  -3   9  351.16   39.29
  -7   3   9  370.51   40.74
  -7  -3  10  195.09   33.34
   7  -3  10  166.48   32.46
  -7   3  10  152.18   31.69
   7   3  10  155.97   30.86
  -7   4   0   -2.63    4.90
  -7  -4   0   -6.13    5.15
  -7  -4   0   -1.79    3.62
  -7   4   0   -7.57    4.98
   7   4   0   -0.91    3.95
  -7  -4   1 1760.63   73.52
  -7  -4  -1 1655.73   73.11
   7  -4   1 1712.53   71.44
  -7  -4   1 1478.81   71.68
  -7  -4   1 1575.04   69.23
  -7   4   1 1638.04   74.34
  -7  -4  -1 1720.18   70.85
  -7   4  -1 1654.34   75.52
  -7   4   1 1694.07   73.93
   7  -4   1 1793.49   74.72
   7   4   1 1819.76   72.40
  -7  -4   1 1666.98   73.60
  -7  -4  -2   50.81    6.59
  -7   4   2   53.79    9.63
  -7  -4   2   43.58    9.34
   7  -4   2   40.59    9.17
  -7  -4   2   45.64    8.89
   7   4   2   69.42    9.09
  -7  -4   2   54.70    9.54
  -7   4   2   41.63    8.24
  -7   4   3   10.63    5.65
  -7  -4   3   -0.27    6.11
   7  -4   3   16.40    7.03
  -7  -4   3    6.20    5.89
  -7   4   3   -2.10    8.21
   7   4   3   17.74    7.95
   7  -4   4  205.74   20.18
  -7   4   4  217.13   20.79
  -7  -4   4  209.03   21.13
   7   4   4  200.61   19.26
  -7   4   4  211.52   17.65
  -7  -4   4  223.77   20.13
  -7   4   5 1390.49   67.17
  -7   4   5 1324.76   63.96
   7  -4   5 1456.27   67.71
  -7  -4   5 1044.61   63.14
  -7  -4   5 1423.06   69.79
   7   4   5 1087.78   62.92
  -7  -4   6  147.89   21.61
  -7   4   6  110.90   16.99
   7   4   6  120.40   19.33
  -7   4   6  132.47   20.93
   7  -4   6  110.26   19.76
   7  -4   7  125.33   22.74
   7   4   7  142.79   22.87
  -7   4   7  116.28   19.01
  -7   4   7  142.48   23.91
  -7  -4   7  145.79   23.76
  -7   4   8   17.55   14.91
  -7  -4   8   29.20   15.70
   7   4   8   36.03   15.27
   7  -4   8   40.44   16.80
   7  -4   9  715.62   55.29
  -7   4   9  721.42   56.44
   7   4   9  814.58   56.87
  -7  -4   9  852.97   59.28
   7   4  10   19.48   18.69
  -7  -4  10   38.92   20.85
   7  -4  10   58.26   23.25
  -7   4  10   25.18   19.09
  -7  -5   0    2.61    3.81
  -7   5   0    5.55    5.87
   7   5   0    5.18    4.83
  -7  -5   0    0.26    5.11
  -7   5   0    1.93    6.21
  -7   5   1  932.19   46.02
  -7  -5   1  947.04   45.94
  -7   5  -1  992.11   47.82
  -7  -5  -1  952.15   41.48
   7  -5   1  985.52   47.61
   7  -5   1  911.08   45.17
   7   5   1  975.14   45.34
  -7   5   1  926.48   46.93
  -7  -5  -1  977.15   46.76
  -7  -5   2    8.32    6.27
  -7   5   2    9.91    5.39
  -7  -5  -2    4.54    3.72
  -7  -5   2    0.86    5.51
  -7  -5   2    5.05    5.91
   7  -5   2   12.62    7.31
  -7   5   2   21.59    8.31
   7   5   2    9.73    6.29
  -7  -5   3   16.13    7.35
  -7   5   3   22.94    8.90
  -7  -5  -3   18.42    5.23
  -7  -5   3   31.85    9.29
   7  -5   3   17.61    8.41
  -7   5   3   19.41    6.66
   7   5   3   20.94    7.66
  -7  -5   4  492.79   31.99
   7   5   4  551.38   32.56
   7  -5   4  500.44   32.69
  -7  -5   4  452.84   32.77
  -7   5   4  477.40   29.20
  -7   5   4  514.51   33.20
  -7  -5   5  310.49   29.01
  -7  -5   5  293.32   26.79
   7   5   5  277.31   25.44
  -7   5   5  317.36   28.32
  -7   5   5  280.24   22.70
   7  -5   5  326.52   28.42
   7   5   6  681.30   45.07
   7  -5   6  701.35   46.30
  -7   5   6  686.03   46.05
  -7   5   6  764.45   43.06
  -7  -5   6  726.46   46.17
   7  -5   7   38.06   15.47
   7   5   7   16.86   11.91
  -7   5   7    9.13   12.26
  -7  -5   7   22.24   14.19
  -7   5   7   15.54    9.81
  -7   5   8  169.88   29.25
  -7  -5   8  231.87   31.58
   7   5   8  224.16   29.74
   7  -5   8  167.73   28.72
  -7  -5   9  215.42   34.03
   7   5   9  255.39   34.51
   7  -5   9  224.69   34.32
  -7   5   9  273.93   37.20
  -7   6   0   -5.18    5.90
  -7  -6   0    2.99    4.01
  -7   6   0    4.41    5.56
   7   6   0   -5.59    4.44
  -7  -6   0   -1.51    5.47
  -7  -6  -1 1157.13   56.57
  -7   6   1 1091.85   57.42
   7   6   1 1207.84   56.17
  -7  -6   1 1228.48   57.22
  -7   6   1 1184.75   56.22
  -7  -6   1 1192.83   54.66
  -7  -6   1 1199.44   55.11
  -7  -6   1 1240.62   56.53
  -7   6  -1 1188.42   57.74
  -7  -6  -1 1229.37   50.64
  -7   6   2    3.44    7.62
  -7  -6   2    2.39    4.09
  -7   6   2   -2.19    4.54
   7   6   2    0.50    6.11
  -7  -6  -2    5.15    3.03
   7  -6   2    3.67    6.61
  -7  -6   2    9.87    6.44
  -7  -6   2   17.86    7.63
   7  -6   2    2.12    6.33
  -7   6   3    8.17    5.54
  -7  -6   3   14.41    7.71
   7   6   3   19.58    8.02
  -7  -6   3   25.98    8.95
  -7   6   3   17.78    9.30
   7  -6   3   13.53    8.24
  -7  -6  -3   33.18    5.35
  -7   6   4   60.49   13.58
  -7  -6   4   80.20   15.09
   7  -6   4   73.22   13.61
  -7   6   4   81.28   11.72
   7   6   4   60.31   12.83
  -7  -6   4   69.85   13.90
  -7   6   5 1150.75   57.08
  -7  -6   5 1081.88   60.48
   7  -6   5 1066.24   61.13
   7   6   5 1156.65   61.11
  -7   6   5 1178.51   62.80
   7   6   6  172.76   23.32
  -7   6   6  233.22   21.38
  -7   6   6  187.60   25.63
   7  -6   6  160.85   24.18
  -7  -6   6  212.86   26.16
  -7   6   7  156.80   26.94
   7   6   7  227.61   28.26
  -7   6   7  223.69   23.59
  -7  -6   7  246.50   29.66
   7  -6   7  252.31   30.17
  -7   6   8   65.28   20.95
   7   6   8  118.17   24.19
  -7  -6   8  102.80   24.02
   7  -6   8  108.06   22.64
   7  -6   9  527.15   50.48
  -7  -6   9  528.09   50.63
  -7   6   9  640.05   55.24
   7   6   9  555.70   50.19
   7   7   0    0.92    5.05
  -7  -7   0    0.92    3.74
  -7  -7   0   -4.15    5.08
  -7   7   0    1.12    7.11
  -7   7   0   -2.05    4.93
  -7   7   1  101.13   11.95
  -7  -7  -1   89.03   13.31
  -7  -7  -1   96.69    6.96
   7   7   1   93.62   13.09
  -7   7   1  120.59   15.89
  -7  -7   1   85.85   12.64
  -7   7  -1   75.73   13.58
   7   7  -1   88.75   12.82
  -7   7  -1   72.52   11.95
  -7  -7   1  114.37   11.27
  -7  -7   2  172.34   17.90
  -7  -7   2  163.03   17.12
  -7   7   2  141.25   13.58
  -7  -7   2  155.78   15.56
   7  -7   2  125.23   17.09
   7  -7   2  163.16   18.10
  -7   7   2  171.34   18.97
   7   7   2  141.89   16.10
   7  -7   3   77.38   14.68
  -7   7   3   50.79    9.05
   7   7   3   61.45   12.25
  -7  -7   3   77.42   13.21
  -7  -7  -3   74.10    6.16
  -7  -7   3   73.03   13.52
  -7   7   3   42.78   11.80
  -7  -7   4  562.10   39.77
   7   7   4  616.84   39.56
  -7  -7  -4  707.26   31.83
  -7   7   4  639.28   35.28
   7  -7   4  624.20   40.82
  -7   7   4  715.70   42.89
  -7  -7   4  681.82   40.97
   7   7   5  648.99   41.41
   7  -7   5  554.61   40.35
  -7  -7   5  607.27   40.91
  -7   7   5  653.15   43.49
  -7   7   5  608.82   35.43
  -7   7   6 1033.40   61.70
   7   7   6  978.48   58.91
  -7   7   6 1045.28   54.12
  -7  -7   6 1041.90   60.59
   7  -7   6  971.43   60.23
   7   7   7  101.63   20.89
   7  -7   7  105.69   22.40
  -7  -7   7  137.43   25.01
  -7   7   7   93.47   22.06
   7  -7   8  195.45   31.09
   7   7   8  201.90   30.00
  -7  -7   8  180.03   29.95
  -7   7   8  174.09   31.62
   7  -7   9  277.07   39.09
  -7  -7   9  298.00   40.15
  -7   7   9  344.68   42.52
   7   7   9  285.80   38.16
   7   8   0    2.98    6.31
  -7   8   0   -6.74    4.86
  -7  -8   0  -10.35    2.76
  -7  -8   0    0.46    6.19
  -7   8   0   -9.75    6.77
  -7   8  -1  630.20   38.24
  -7   8   1  690.41   41.67
  -7  -8   1  705.18   38.50
   7   8   1  744.32   40.27
   7   8  -1  696.41   40.14
  -7  -8   1  742.00   36.27
  -7   8   1  675.65   36.98
  -7  -8  -1  715.25   39.58
  -7   8  -1  717.06   41.72
  -7   8   2   14.84    9.25
  -7  -8   2    6.81    7.45
  -7  -8   2    9.86    7.82
  -7  -8  -2    0.78    6.58
  -7  -8   2    8.48    6.38
   7  -8   2   14.47    8.57
   7  -8   2   11.04    8.38
  -7   8   2    2.84    5.34
  -7  -8   2   -0.81    2.93
   7   8   2    8.75    7.36
   7   8   3   43.04   11.34
  -7   8   3   31.05   11.66
  -7   8   3   54.55    8.87
   7  -8   3   43.53   11.86
   7  -8   3   42.57   12.17
  -7  -8   3   40.40   11.46
  -7  -8   3   58.32   11.55
   7  -8   4  299.23   29.83
   7   8   4  353.53   28.29
  -7   8   4  353.07   22.54
  -7  -8   4  346.08   28.56
  -7   8   4  346.48   30.96
  -7  -8   5 1218.44   66.24
   7  -8   5 1277.75   68.66
  -7   8   5 1168.38   58.74
  -7   8   5 1141.18   67.15
   7   8   5 1246.03   66.27
  -7  -8   6  253.47   29.14
   7  -8   6  227.66   29.66
   7   8   6  228.56   28.35
  -7   8   6  251.47   30.98
   7   8   7  106.93   21.85
  -7  -8   7  122.28   23.92
   7  -8   7   65.60   19.16
  -7   8   7  116.48   24.38
   7  -8   8   86.19   22.29
  -7   8   8   80.98   22.80
  -7  -8   8  103.11   24.24
   7   8   8   88.77   22.51
  -7  -8   9  650.76   56.20
   7  -8   9  544.64   53.58
   7   8   9  592.28   53.91
  -7   8   9  558.41   53.58
   7   9   0    3.09    6.29
  -7   9   0    2.46    7.85
  -7  -9   0    0.24    5.83
  -7   9   0    3.16    6.14
   7   9  -1 1060.41   56.62
   7  -9   1 1083.66   46.75
  -7   9   1 1133.11   59.46
  -7   9  -1 1114.77   55.50
   7   9   1 1063.44   56.15
  -7   9   1 1131.06   53.46
  -7  -9  -1  967.35   53.95
  -7   9  -1 1070.97   58.36
  -7  -9  -2  212.18   21.52
   7  -9   2  167.22   20.92
  -7   9   2  197.68   22.72
  -7  -9   2  226.14   22.19
  -7  -9   2  179.94   18.88
   7  -9   2  184.85   22.46
  -7   9   2  181.69   15.82
  -7  -9   2  185.40   21.20
   7   9   2  234.19   22.05
  -7  -9   3   11.63    9.72
   7   9   3   34.49   10.91
  -7  -9   3   22.75    8.68
   7  -9   3   18.67   10.78
  -7  -9   3    7.73    9.75
  -7   9   3   25.95    6.54
   7  -9   3   18.29   11.37
  -7   9   3   27.68   11.16
   7   9   4  533.04   36.48
  -7  -9   4  508.99   37.08
  -7   9   4  500.89   28.88
   7  -9   4  483.65   37.59
  -7   9   4  556.76   40.36
   7  -9   5  157.52   24.71
   7   9   5  240.31   27.23
  -7   9   5  200.42   27.51
  -7  -9   5  242.24   27.77
  -7   9   6  661.97   48.98
  -7  -9   6  638.06   46.60
   7   9   6  658.01   46.87
   7  -9   6  671.92   48.72
   7  -9   7    8.48   13.07
  -7   9   7   19.98   17.31
   7   9   7   20.83   14.59
  -7  -9   7   29.04   16.24
   7   9   8  208.26   31.35
  -7   9   8  154.78   29.72
   7  -9   8  176.81   30.62
  -7  -9   8  127.67   27.96
  -7  -9   9  242.21   37.82
   7  -9   9  303.08   41.91
  -7   9   9  241.25   37.88
   7   9   9  234.56   37.18
  -7 -10   0    3.42    6.58
  -7  10   0    6.41    9.08
  -7  10   0    3.74    6.69
   7  10   0    2.98    7.03
   7  10   1  653.60   40.12
   7 -10   1  622.31   30.27
   7  10  -1  680.83   40.95
  -7  10  -1  600.10   36.75
  -7 -10  -1  647.77   38.81
  -7  10   1  607.54   34.76
  -7  10   1  605.16   41.47
  -7  10  -1  598.84   41.00
   7  10   2  354.85   27.87
  -7 -10   2  335.28   24.90
  -7  10   2  309.75   21.14
  -7  10   2  303.27   29.58
  -7  10  -2  339.86   30.42
  -7 -10  -2  306.30   27.40
  -7  10   3   39.17    7.80
   7 -10   3   11.39   10.90
  -7 -10   3   35.41   13.49
   7  10   3   39.17   12.51
  -7 -10   3   19.55   11.60
   7 -10   3   28.80   12.12
  -7  10   3   20.14   12.85
  -7 -10   3   29.35   10.64
  -7  10   4  316.50   32.59
   7 -10   4  279.56   31.09
  -7 -10   4  311.33   30.83
   7  10   4  278.54   28.94
   7 -10   4  318.81   31.46
  -7  10   5 1345.81   76.73
  -7 -10   5 1388.99   75.04
   7 -10   5 1272.08   75.05
   7  10   5 1314.74   73.90
  -7 -10   6   94.61   21.98
  -7  10   6   91.06   22.93
   7  10   6   61.98   18.62
   7 -10   6  112.76   23.25
   7 -10   7  111.13   25.14
   7  10   7  169.41   28.87
  -7 -10   7  171.63   29.99
  -7  10   7  133.19   28.38
  -7 -10   8   69.48   24.50
   7  10   8  113.02   25.61
  -7  10   8   56.47   22.33
   7 -10   8   54.32   21.11
  -7  11   0    1.42    6.45
  -7 -11   0   10.41    8.66
   7  11   0   -4.92    7.36
  -7  11   0   -4.44    9.16
   7  11   1  158.01   21.29
  -7 -11  -1  142.62   20.02
  -7  11   1  152.13   22.88
  -7  11   1  154.22   15.80
   7  11  -1  154.20   21.64
  -7  11  -1  172.32   23.98
  -7  11  -1  142.43   17.86
   7 -11   1  163.48   13.16
  -7 -11   2   62.58   13.67
  -7  11  -2   92.60   19.95
   7  11  -2   67.48   16.34
  -7 -11  -2   77.62   16.41
  -7  11   2   73.24   17.68
   7  11   2   90.46   17.47
  -7  11   2  107.03   12.07
  -7  11  -2   72.63   14.84
   7  11   3    4.35   10.11
   7 -11   3   -5.07    9.29
  -7  11   3   15.86   12.38
   7 -11   3    1.47    8.68
  -7 -11   3    1.15   11.29
  -7 -11   3   -0.80    7.28
  -7 -11   3  -15.80    9.13
  -7 -11   4  751.68   48.34
   7 -11   4  558.92   45.56
  -7  11   4  664.50   47.62
  -7 -11   4  644.87   44.51
   7 -11   4  682.66   46.42
   7  11   4  726.89   46.52
   7  11   5  480.04   38.71
   7 -11   5  445.00   40.69
  -7 -11   5  451.09   40.26
  -7  11   5  418.75   40.52
   7 -11   5  457.52   42.12
  -7  11   6  439.55   44.30
   7  11   6  540.17   42.85
   7 -11   6  486.56   45.01
  -7 -11   6  487.46   43.84
  -7 -11   7   80.26   23.68
   7  11   7   98.82   24.02
   7 -11   7  122.66   27.09
  -7  11   7  114.59   27.65
  -7 -11   8  125.27   29.54
   7 -11   8  122.70   29.25
  -7  11   8  120.47   29.40
   7  11   8   95.04   24.66
  -7 -12   0    4.37    8.53
  -7  12   0   -2.45   10.38
   7  12   0   -1.01    8.73
  -7  12   0    7.77    7.23
  -7  12   1  936.85   57.80
  -7  12  -1  880.84   50.70
   7  12   1  827.49   53.55
   7  12  -1  960.89   56.50
  -7 -12  -1  919.36   52.91
  -7 -12   1 1000.22   52.60
  -7  12  -1  910.51   57.63
  -7  12   1 1001.04   48.95
  -7 -12   2   31.73   11.62
  -7  12  -2   36.79   14.52
  -7  12   2    6.44   12.30
  -7  12  -2   22.58    9.64
   7  12  -2    9.86   11.14
  -7 -12  -2   15.33   11.08
   7  12   2   22.64   11.92
  -7  12   3   25.69   14.82
  -7 -12   3   25.31   14.10
  -7 -12   3   25.84   13.69
   7  12   3   30.81   12.85
  -7 -12   3   11.96    9.64
  -7 -12  -3   40.21   14.19
  -7 -12   4   73.13   19.33
   7  12   4   61.79   17.85
  -7 -12   4   42.00   15.93
   7 -12   4   50.09   18.12
  -7  12   4   82.59   22.02
   7 -12   4   44.05   16.06
  -7  12   5  627.93   49.65
   7  12   5  599.53   45.84
   7 -12   5  539.26   48.44
  -7 -12   5  616.63   47.34
  -7 -12   5  659.40   46.77
   7 -12   5  632.98   46.91
  -7 -12   6  409.79   41.98
   7 -12   6  451.15   45.35
   7  12   6  409.86   42.07
  -7  12   6  419.57   44.94
   7 -12   6  397.66   42.14
  -7  12   7   87.21   25.89
   7 -12   7  104.88   24.91
  -7 -12   7  100.74   26.15
   7  12   7   98.00   24.48
  -7  12   8  179.21   36.73
   7  12   8  150.53   30.70
   7 -12   8  127.69   30.04
  -7 -12   8  127.16   30.12
  -7 -13   0   -8.61    7.81
   7  13   0    5.27   10.91
  -7  13   0    4.01    7.72
  -7  13   0    8.30   12.56
   7  13   1  212.13   26.60
   7  13  -1  215.11   27.99
  -7  13   1  196.63   28.47
  -7  13  -1  197.85   28.41
  -7 -13   1  190.61   23.49
  -7  13  -1  215.43   21.83
  -7 -13  -1  207.09   24.75
   7  13   2   91.52   19.53
  -7  13  -2   65.18   16.00
  -7 -13   2   66.46   14.40
  -7 -13  -2   81.77   18.06
  -7  13   2   77.13   19.75
   7  13  -2   70.46   17.87
  -7  13  -2   76.47   20.00
   7  13  -3   -1.34   11.00
  -7  13   3   30.88   15.26
  -7 -13   3   24.59   10.61
  -7 -13  -3   21.91   12.99
   7  13   3    4.29   10.78
  -7  13  -3   10.95   14.12
  -7  13   4  318.40   37.20
   7 -13   4  273.89   35.80
  -7 -13   4  351.18   36.95
  -7 -13   4  422.41   38.47
   7 -13   4  336.02   37.50
   7  13   4  304.11   34.63
   7 -13   5  281.61   35.69
  -7  13   5  349.19   39.19
   7 -13   5  263.77   35.80
   7  13   5  303.10   35.09
  -7 -13   5  311.01   36.71
  -7 -13   5  272.84   35.15
  -7 -13   6  408.42   42.44
  -7 -13   6  375.62   41.81
  -7  13   6  329.71   42.76
   7 -13   6  395.70   42.49
   7 -13   6  311.56   40.88
   7  13   6  362.92   40.01
   7  13   7  -17.10   14.52
   7 -13   7   -1.61   16.75
  -7  13   7   -5.42   18.37
   7 -13   7   30.57   18.85
  -7 -13   7   31.23   18.82
   7  14   0    3.87   10.78
  -7 -14   0    0.51    8.56
  -7  14   0    8.57   12.06
  -7  14  -1  436.75   31.32
  -7  14  -1  398.72   39.88
   7  14   1  380.85   36.74
  -7  14   1  435.19   41.17
   7  14  -1  352.13   36.65
  -7 -14   1  459.08   33.62
  -7 -14  -1  433.34   34.13
  -7 -14   2   82.53   16.37
  -7 -14  -2   43.29   14.34
  -7  14   2   52.40   18.09
  -7  14  -2   35.13   15.73
  -7  14  -2   69.97   16.23
   7  14  -2   64.71   17.96
   7  14   2   71.50   19.34
  -7  14  -3   15.23   15.31
  -7  14   3    5.34   13.80
  -7 -14  -3   13.73   12.74
   7  14   3   33.04   15.55
   7  14  -3    5.02   11.47
  -7  14  -3    4.53   11.22
  -7 -14   4  203.15   30.80
  -7 -14  -4  241.64   30.30
  -7  14   4  216.01   33.21
   7  14   4  248.47   32.10
  -7 -14   4  270.01   35.71
   7 -14   5  746.03   58.03
   7 -14   5  706.21   54.98
  -7 -14   5  815.54   58.23
  -7 -14   5  732.62   54.29
   7  14   5  789.00   55.35
  -7  14   5  699.23   56.80
  -7 -14   6   12.06   17.01
  -7  14   6   37.93   21.65
  -7 -14   6   37.18   19.61
   7 -14   6   43.34   19.03
   7  14   6   36.12   17.60
   7 -14   6   30.03   17.37
   7  14   7   72.72   24.17
  -7 -14   7  173.62   34.48
  -7 -14   7   87.03   25.73
  -7  14   7  104.73   27.23
   7 -14   7  114.99   27.79
   7 -14   7   76.53   26.53
  -7 -15   0    2.82    7.57
  -7  15   0   19.50   16.03
   7  15   0    2.04   11.51
  -7  15  -1  125.07   25.28
   7  15   1   73.70   20.52
  -7 -15   1  123.22   20.98
  -7  15   1  125.74   25.39
   7  15  -1  122.86   24.55
  -7 -15  -1  133.16   22.85
  -7  15  -2   67.85   21.65
   7  15   2   52.61   19.07
   7  15  -2   46.99   18.11
  -7  15   2   92.08   22.94
  -7 -15  -2   79.52   19.35
   7  15   3   27.31   14.32
  -7 -15  -3    3.14   11.31
  -7  15   3   15.20   16.12
  -7  15  -3   -7.83   13.50
  -7  15  -3   10.28   11.40
   7  15  -3   29.09   15.91
  -7  15   4  162.04   31.18
  -7 -15  -4  202.08   28.85
  -7  15  -4  230.81   33.78
   7  15  -4  160.45   28.08
   7  15   4  239.53   32.34
  -7 -15  -5  160.56   26.31
  -7 -15   5  184.63   32.86
  -7 -15   5  192.41   33.82
   7  15   5  185.60   30.76
   7 -15   5  186.41   32.29
   7 -15   5  154.07   31.84
  -7  15   5  190.62   33.72
   7  15   6  190.82   33.68
  -7 -15   6  240.73   37.08
  -7  15   6  280.64   40.89
   7 -15   6  178.76   34.39
  -7 -15   6  214.85   37.05
   7 -15   6  245.09   38.51
   7  16   0   -5.91   11.90
  -7 -16   0    4.27   10.30
  -7  16   0  -11.31   13.18
  -7 -16  -1  331.99   33.60
   7  16   1  326.43   37.18
  -7  16  -1  260.71   37.41
  -7  16   1  344.13   39.99
   7  16  -1  371.62   38.53
  -7  16   2   48.45   19.50
   7  16   2   14.24   14.77
  -7 -16  -2   29.78   15.66
   7  16  -2   17.30   15.12
  -7  16  -2   39.95   18.06
  -7  16  -3   17.33   16.51
   7  16  -3   30.01   15.76
   7  16   3   -3.87   12.98
  -7 -16  -3   40.17   16.41
  -7  16   3   14.55   16.49
  -7  16   4   40.66   21.00
  -7 -16  -4   15.16   15.62
  -7  16  -4   27.47   15.15
   7  16  -4   65.03   19.27
  -7  16  -4   57.50   21.55
   7  16   4   57.80   18.78
  -7 -16  -5  232.28   32.72
   7  16   5  291.81   39.46
   7  16  -5  249.75   35.72
  -7  16   5  230.07   38.10
  -7  16  -5  292.24   40.23
   7 -16   6   86.25   27.36
   7  16   6  141.03   30.57
  -7 -16   6  173.25   34.60
  -7 -16  -6  147.37   27.48
  -7 -16   6  209.43   35.23
  -7  16   6   88.52   28.60
   7 -16   6  128.66   28.93
  -7  17   0  -25.51   13.04
   7  17   0   15.03   15.30
  -7 -17   0   28.05   15.13
   7  17   1   63.25   19.77
  -7 -17  -1  103.58   21.57
  -7  17   1   30.15   19.16
  -7  17  -1   97.17   25.15
   7  17  -1   92.74   22.60
  -7 -17  -2   58.74   19.29
  -7  17  -2   59.93   23.55
  -7  17   2   72.34   23.08
   7  17  -2   64.07   22.35
   7  17   2   55.01   19.30
  -7  17  -3   47.77   21.64
   7  17   3   32.25   17.73
  -7  17   3   26.27   18.58
  -7 -17  -3   15.18   15.41
   7  17  -3   52.90   19.95
   7  17  -4  171.41   31.09
  -7 -17  -4  186.46   29.92
  -7  17   4  186.62   35.09
  -7  17  -4  188.47   33.85
   7  17   4  199.76   33.12
   7  17  -5  149.52   29.80
  -7  17  -5  177.66   34.68
  -7  17   5  140.29   32.24
  -7 -17  -5  140.88   26.99
  -7  17  -5  163.07   27.18
   7  17   5  226.50   35.84
   7  18   0    6.69   14.77
  -7  18   0   -4.37   16.23
  -7 -18  -1  130.58   24.93
   7  18  -1  145.36   28.90
   7  18   1  179.19   30.90
  -7  18   1  165.95   31.92
  -7  18  -1  203.41   33.95
  -7 -18  -2   32.79   17.20
  -7  18  -2   63.37   23.03
   7  18  -2   28.56   19.18
   7  18   2   60.79   20.85
  -7  18   2   38.86   20.51
  -7 -18  -3   -7.03   14.28
   7  18   3    6.39   14.98
  -7  18   3    1.23   17.44
   7  18  -3    3.91   15.06
  -7  18  -3   11.32   20.32
   7  18   4   94.21   25.26
  -7 -18  -4   92.40   23.65
   7  18  -4   76.90   23.80
  -7  18   4   88.48   26.73
  -7  18  -4   86.08   27.61
  -7  19   0    7.58   17.98
   7  19   0   17.58   16.60
   7  19  -1  138.93   28.41
  -7  19   1  140.85   32.23
  -7  19  -1  111.02   29.94
   7  19   1  186.11   32.19
   7  19   2   11.27   17.49
  -7  19   2   27.18   20.91
  -7  19  -2   63.62   22.67
   7  19  -2   22.22   19.63
  -7 -19  -2   13.59   16.21
   7  19  -3   41.16   20.20
  -7 -19  -3   35.84   18.74
  -7  19   3   17.67   19.23
   7  19   3   72.05   24.14
  -7  19  -3   43.30   23.06
  -8   0   0  269.56   18.00
  -8   0   0  276.56   16.80
  -8   0  -1  304.71   19.30
  -8   0   1  275.15   18.49
   8   0   1  292.04   15.09
  -8   0   1  308.38   15.43
  -8   0  -1  302.69   17.02
  -8   0  -2 3853.33  156.29
  -8   0   2 3674.59  156.43
  -8   0  -2 3607.55  148.58
   8   0   2 3779.16  151.46
   8   0   3    4.55    5.42
  -8   0   3   17.74    6.74
  -8   0   3   -0.12    5.44
   8   0   4   32.77    8.98
  -8   0   4   26.73    8.60
  -8   0   4   16.00    7.84
   8   0   5   18.13    9.61
  -8   0   5   19.66    9.15
  -8   0   5   10.25    8.35
  -8   0   6  803.83   49.24
  -8   0   6  795.68   48.38
   8   0   6  791.43   47.58
   8   0   7   70.09   16.68
  -8   0   7   38.35   14.85
  -8   0   7   31.19   13.39
  -8   0   8  575.01   43.65
   8   0   8  484.40   40.67
   8   0   9   35.40   16.62
  -8   0   9   42.08   19.68
  -8   0  10   20.10   16.83
   8   0  10   11.43   16.92
  -8  -1   0  312.79   18.76
  -8   1   0  291.28   19.63
  -8  -1   0  287.39   19.03
  -8   1   0  303.41   15.28
  -8   1   0  267.99   16.58
   8   1   1  520.82   23.31
  -8   1  -1  487.59   27.62
  -8   1   1  527.28   24.17
   8  -1   1  517.11   24.32
  -8   1  -1  501.91   24.40
  -8   1   1  481.82   27.86
  -8  -1   1  503.17   23.34
  -8  -1   1  540.55   27.98
  -8  -1   1  504.90   27.08
  -8  -1  -1  518.31   26.09
  -8  -1  -1  533.22   27.10
   8   1   2  243.75   15.08
  -8  -1  -2  225.28   16.14
  -8   1   2  213.13   16.66
   8  -1   2  234.74   15.45
  -8  -1  -2  233.94   15.76
  -8  -1   2  202.61   14.22
  -8   1  -2  228.50   13.92
  -8  -1   2  247.88   17.64
   8  -1   3  894.13   44.51
  -8  -1   3  930.80   44.71
  -8   1   3  937.84   45.23
   8   1   3  900.51   44.11
  -8  -1   3  970.22   48.08
  -8   1   3  867.53   46.38
  -8  -1   4  136.64   15.50
  -8   1   4  167.47   17.45
   8  -1   4  117.98   14.97
  -8  -1   4  135.33   16.59
   8   1   4  139.00   15.35
  -8   1   4  169.48   16.80
   8  -1   5   65.13   13.60
  -8  -1   5  107.48   17.07
  -8  -1   5   98.78   15.67
  -8   1   5   74.45   14.60
   8   1   5   75.90   13.81
  -8   1   5   91.37   15.58
   8   1   6   20.29   10.83
  -8   1   6   12.97    9.32
   8  -1   6   12.66   10.57
  -8   1   6   12.49   11.05
  -8  -1   6   16.38   10.49
  -8  -1   6   42.55   12.89
   8   1   7    4.49   10.35
  -8   1   7    5.16   11.12
  -8   1   7   -0.56    8.36
  -8  -1   7   25.55   13.43
  -8  -1   7  -21.65    5.81
   8  -1   7   15.34   11.17
  -8   1   8   -2.43   12.22
   8  -1   8    2.05   11.24
  -8  -1   8   -2.38   12.48
   8   1   8   -0.42   11.06
   8  -1   9  108.49   23.20
  -8  -1   9   71.59   21.71
   8   1   9   92.03   21.95
  -8   1   9   98.41   23.13
  -8   1  10   36.58   19.98
  -8  -1  10    8.25   16.82
   8   1  10   -3.42   14.33
   8  -1  10   10.60   15.47
  -8  -2   0  125.63   11.15
  -8   2   0  126.79   12.98
  -8   2   0  113.18   10.19
   8   2   0  142.31    8.60
  -8  -2   0  138.51   12.46
  -8  -2   1   70.19    6.82
   8   2   1   48.76    5.94
  -8   2   1   62.69    9.76
  -8   2   1   71.02    7.62
  -8  -2  -1   68.03    8.89
  -8   2  -1   76.79    6.82
   8  -2   1   72.37    8.07
  -8  -2   1   63.86    8.84
  -8   2  -1   81.90   10.23
  -8  -2   1   65.47    9.54
  -8  -2  -1   48.02    7.18
  -8   2  -2 3228.44  128.19
  -8  -2   2 3250.52  137.90
  -8   2   2 3301.99  137.60
  -8  -2   2 2798.06  131.96
  -8  -2  -2 3394.67  135.58
   8   2   2 3334.08  132.73
  -8  -2  -2 3350.82  132.97
  -8   2   2 3186.26  133.38
   8  -2   2 3356.70  134.00
   8  -2   3   62.01    9.83
  -8  -2   3   48.76   10.69
   8   2   3   44.30    8.70
  -8  -2   3   34.42    8.34
  -8   2   3   40.17    8.97
  -8   2   3   53.24    9.91
  -8  -2   4  261.79   23.46
  -8   2   4  272.58   21.35
   8   2   4  252.09   20.00
  -8   2   4  289.07   21.73
  -8  -2   4  250.26   20.52
   8  -2   4  274.35   21.20
  -8   2   5    8.41    8.11
  -8  -2   5   21.11    9.40
   8  -2   5   32.43   10.22
   8   2   5   11.91    7.93
  -8   2   5   17.98    8.55
  -8  -2   5    9.34    9.49
   8  -2   6  635.05   40.39
  -8   2   6  559.85   38.97
  -8  -2   6  593.54   40.05
  -8   2   6  547.27   39.29
   8   2   6  622.07   39.81
  -8  -2   6  576.32   40.80
  -8   2   7  -13.94    7.94
  -8   2   7   19.42   13.44
  -8  -2   7   26.13   13.46
  -8  -2   7   10.27   12.10
   8   2   7   10.87   11.52
   8  -2   7   -3.87    9.62
  -8  -2   8  252.85   32.57
  -8   2   8  332.35   34.70
   8  -2   8  332.65   34.81
   8   2   8  272.51   32.28
   8  -2   9   53.63   16.98
  -8   2   9   63.11   20.94
   8   2   9   34.47   16.94
  -8  -2   9   27.08   18.35
   8  -2  10   -3.20   15.15
  -8  -2  10   35.52   19.31
  -8   2  10   -8.00   14.82
   8   2  10   16.73   19.47
  -8   3   0  773.54   41.41
  -8  -3   0  895.38   41.13
   8   3   0  848.54   37.44
  -8  -3   1 2192.11   94.16
  -8  -3   1 2135.48   92.40
   8  -3   1 2259.35   92.67
  -8  -3  -1 2124.47   91.90
  -8  -3   1 2216.70   90.73
   8   3   1 2214.21   90.07
   8  -3   1 2183.92   88.75
  -8   3   1 2191.18   95.10
  -8   3  -1 2083.36   95.31
  -8  -3  -1 2238.29   92.26
   8  -3   2    5.43    5.45
  -8   3   2    2.16    5.35
  -8  -3  -2    4.53    4.65
  -8   3  -2    4.94    2.99
  -8  -3   2    1.28    5.29
  -8   3   2    7.10    5.54
   8   3   2    4.33    4.89
  -8  -3   2   -1.31    2.20
  -8  -3  -2   -6.51    4.80
  -8  -3   3  908.69   48.42
  -8  -3   3  922.37   45.52
  -8   3   3  889.24   46.28
   8   3   3  942.59   45.61
   8  -3   3  947.31   46.64
  -8   3   3  952.35   47.74
   8   3   4   11.47    7.61
  -8   3   4   31.32    9.74
  -8  -3   4   12.87    7.98
   8  -3   4   13.53    8.11
  -8   3   4   34.63    9.09
  -8  -3   4   30.29    9.12
  -8  -3   5   40.03   12.47
   8  -3   5   44.44   11.68
  -8   3   5   28.03    9.54
  -8   3   5   30.45   11.09
  -8  -3   5   26.27   10.21
   8   3   5   43.58   11.30
  -8  -3   6   11.28   10.02
   8   3   6   -1.81    8.08
  -8  -3   6    5.90    9.75
   8  -3   6    0.45    9.80
  -8   3   6   15.21   11.46
  -8   3   6    4.15    8.60
  -8   3   7    6.73   12.57
   8   3   7    3.96   10.82
  -8   3   7   17.40   11.32
  -8  -3   7    8.43   12.33
   8  -3   7    7.61   10.69
  -8   3   8   22.60   14.48
  -8  -3   8    6.77   12.52
   8  -3   8   26.11   14.53
   8   3   8    1.22   11.23
  -8   3   9   55.54   20.15
   8  -3   9   26.46   15.69
   8   3   9   46.95   17.98
  -8  -3   9   29.13   17.96
   8  -3  10   26.81   19.07
  -8  -3  10   53.78   22.26
   8   3  10   21.43   17.12
  -8   3  10   27.19   18.95
  -8  -4   0  228.50   14.65
  -8   4   0  224.61   16.81
  -8   4   0  213.79   17.24
   8   4   0  214.04   14.65
  -8  -4   0  205.48   16.22
  -8  -4  -1  324.55   21.31
  -8  -4   1  333.87   21.37
  -8  -4  -1  329.08   18.20
  -8  -4   1  327.27   18.69
   8   4   1  305.04   18.52
   8  -4   1  337.76   20.44
  -8   4  -1  315.33   21.97
   8  -4   1  290.96   20.69
  -8  -4   1  324.85   20.35
  -8  -4   1  337.83   19.67
  -8   4   1  373.80   22.08
  -8   4   1  331.69   21.19
   8   4   2 3054.17  130.41
  -8  -4  -2 3209.64  130.42
  -8  -4  -2 3281.60  132.16
   8  -4   2 3152.56  132.98
  -8   4   2 3055.80  132.22
  -8  -4   2 3211.70  131.40
  -8   4   2 3095.46  133.94
  -8  -4   2 3171.70  135.00
  -8   4   3   78.23   11.30
   8   4   3   84.46   11.72
  -8   4  -3   82.32    6.45
  -8  -4   3   89.39   12.02
  -8  -4   3   88.80   13.45
  -8  -4  -3   77.02    9.00
  -8   4   3   69.99   12.04
   8  -4   3   71.25   12.07
  -8   4   4   14.35    6.97
  -8  -4   4   -5.74    6.10
   8   4   4   15.45    7.55
  -8   4   4   10.25    7.86
   8  -4   4   12.33    7.31
  -8  -4   4   13.04    7.84
  -8  -4   5   83.89   17.39
  -8  -4   5  101.33   17.02
  -8   4   5  139.74   18.92
  -8   4   5  109.45   15.34
   8   4   5  107.45   16.31
   8  -4   5  103.47   16.97
   8   4   6  859.97   50.50
  -8  -4   6  799.46   52.60
  -8   4   6  916.32   52.90
   8  -4   6  866.08   51.62
  -8  -4   6  825.58   50.62
  -8   4   6  798.47   48.52
  -8   4   7    4.90   11.79
   8   4   7    0.99   10.50
  -8  -4   7    4.46   11.26
   8  -4   7  -13.68    8.97
  -8   4   7    4.21    8.41
   8  -4   8  496.37   43.89
  -8  -4   8  518.96   43.07
   8   4   8  512.75   41.79
  -8   4   8  512.23   45.22
  -8   4   9   14.28   15.61
   8   4   9   37.14   16.95
   8  -4   9   12.10   15.15
  -8  -4   9   21.09   18.09
  -8  -4  10   74.71   24.01
   8   4  10   26.24   18.26
  -8   4  10   33.67   20.70
   8  -4  10   40.81   19.43
   8   5   0   77.79    9.92
  -8  -5   0  100.83    9.35
  -8   5   0  104.49   12.77
  -8  -5   0   87.10   11.69
  -8   5   0   89.05   11.64
  -8   5   1  727.51   38.37
  -8  -5   1  756.83   38.76
  -8  -5  -1  774.97   34.03
  -8   5  -1  739.87   39.56
   8   5   1  725.23   36.43
   8  -5   1  797.76   39.56
   8  -5   1  744.58   37.55
  -8   5   1  728.50   38.62
  -8  -5  -1  676.99   37.78
  -8  -5   2   21.92    7.80
  -8   5   2   22.15    7.23
  -8  -5  -2    9.92    6.64
  -8  -5  -2   27.19    5.17
  -8   5   2   19.88    8.77
   8  -5   2   18.50    8.14
   8   5   2   17.57    6.58
  -8  -5   2   32.40    8.26
  -8  -5   2   11.80    7.02
   8   5   3 1411.42   65.60
  -8   5   3 1312.21   64.70
   8  -5   3 1415.56   67.25
  -8   5   3 1464.77   67.80
  -8  -5   3 1387.58   68.38
  -8  -5  -3 1398.17   61.40
  -8  -5   3 1419.66   65.97
   8   5   4  239.81   21.52
  -8  -5   4  236.40   21.74
  -8  -5   4  255.07   23.99
  -8   5   4  232.92   19.11
  -8   5   4  249.27   22.97
   8  -5   4  224.35   22.07
   8  -5   5  193.53   22.20
  -8   5   5  128.13   19.73
  -8  -5   5  165.15   22.04
  -8   5   5  170.89   18.11
   8   5   5  181.26   20.34
  -8  -5   5  165.37   20.50
  -8   5   6   33.49   13.52
   8  -5   6   40.01   13.91
  -8   5   6   28.12   10.43
  -8  -5   6   24.21   11.83
   8   5   6   43.96   13.73
  -8   5   7   31.43   14.58
  -8   5   7   28.40   11.45
  -8  -5   7    9.37   13.27
   8  -5   7   24.21   13.58
   8   5   7   19.39   12.30
   8  -5   8   12.30   12.94
  -8  -5   8   31.84   18.18
   8   5   8   14.62   14.31
  -8   5   8    7.05   14.87
   8   5   9  103.11   23.52
   8  -5   9  119.21   26.23
  -8   5   9  116.17   25.57
  -8  -5   9  100.45   24.84
  -8   6   0  184.86   18.34
  -8  -6   0  200.81   17.87
   8   6   0  211.68   16.38
  -8   6   0  210.52   17.42
  -8  -6   0  230.68   14.45
  -8   6   1   96.55   12.05
  -8  -6  -1   57.77   11.12
  -8  -6  -1   72.63    6.72
  -8   6  -1   59.76   11.13
  -8   6   1   76.58   13.00
  -8  -6   1   85.13   10.36
  -8  -6   1   75.83   11.95
   8   6   1   58.01    9.89
  -8  -6   2 4498.90  185.46
  -8   6   2 4341.40  189.05
  -8  -6   2 4464.79  188.12
  -8  -6  -2 4441.37  186.27
   8  -6   2 4624.66  190.65
   8   6   2 4601.41  187.58
  -8  -6   2 4468.54  190.31
  -8  -6  -2 4690.54  183.47
  -8   6   2 4589.67  189.33
   8  -6   2 4574.50  183.05
  -8   6   3   68.42   10.56
  -8  -6   3   63.27   12.01
  -8   6   3   86.15   14.54
   8  -6   3   49.92   12.02
   8   6   3   61.89   11.35
  -8  -6   3   75.92   13.26
  -8  -6  -3   80.44    7.96
   8   6   4   16.91    9.05
  -8  -6   4   19.57    9.27
  -8   6   4   16.28    9.37
  -8  -6   4   28.24   10.14
  -8   6   4   27.76    8.07
   8  -6   4   43.52   11.84
  -8  -6  -4   30.08    6.83
  -8   6   5   32.80   12.80
   8   6   5   14.41   10.12
  -8   6   5   22.20    8.44
   8  -6   5   40.17   13.23
  -8  -6   5   23.24   11.19
  -8  -6   5   26.01   12.04
  -8   6   6  321.17   32.07
   8  -6   6  309.73   31.02
   8   6   6  354.23   31.45
  -8  -6   6  327.70   31.67
  -8   6   6  318.33   25.20
   8  -6   7   53.97   16.76
  -8   6   7   31.01   15.26
  -8   6   7   27.02   12.07
   8   6   7   43.97   15.83
  -8  -6   7   41.26   15.61
  -8   6   8  220.55   33.29
  -8  -6   8  343.11   37.23
   8  -6   8  290.32   35.40
   8   6   8  283.59   34.01
  -8   6   9   29.74   18.83
   8  -6   9   20.22   16.18
  -8  -6   9   22.00   18.54
   8   6   9   18.94   15.32
  -8   7   0  490.48   30.80
  -8  -7   0  537.52   26.57
   8   7   0  523.69   30.40
  -8   7   0  476.27   31.93
  -8  -7   0  536.09   31.48
  -8   7   1 1791.84   80.40
  -8   7  -1 1740.17   82.58
  -8   7  -1 1873.78   82.71
   8   7   1 1792.27   80.08
   8   7  -1 1700.21   80.14
  -8  -7   1 1812.20   80.10
  -8   7   1 1646.46   81.85
  -8  -7  -1 1823.18   73.84
  -8  -7  -1 1722.16   80.36
  -8  -7   1 1757.05   78.64
  -8  -7  -2   51.88   11.69
  -8   7   2   70.33   10.50
   8  -7   2   50.34   11.67
   8  -7   2   48.09   12.17
  -8  -7   2   46.99    9.98
  -8  -7   2   46.29   10.14
  -8   7   2   63.63   13.28
  -8  -7   2   52.86   11.57
   8   7   2   43.05   11.15
  -8  -7   2   65.20   11.98
   8  -7   3 1269.40   64.65
  -8   7   3 1210.72   58.91
  -8  -7   3 1168.56   62.21
  -8  -7   3 1317.91   63.90
  -8   7   3 1185.57   63.46
  -8  -7  -3 1325.21   53.74
   8   7   3 1243.82   61.80
  -8  -7   4   10.45    7.75
  -8  -7   4   -0.35    7.91
  -8   7   4   11.46    6.03
   8   7   4    2.15    7.62
  -8   7   4    2.29    9.09
   8  -7   4    4.12    9.31
  -8  -7  -4    4.87    4.31
  -8   7   5    8.49   11.31
  -8   7   5   19.78    8.21
   8   7   5    4.09    9.60
   8  -7   5   24.96   12.47
  -8  -7   5   25.57   12.96
   8  -7   6   11.41   11.23
  -8  -7   6    1.01   10.50
   8   7   6   11.28   11.43
  -8   7   6    8.91    7.50
  -8   7   6   16.59   13.21
   8  -7   7   27.47   14.92
   8   7   7   25.46   12.57
  -8   7   7   22.82   15.24
  -8  -7   7   18.74   13.49
   8   7   8   15.64   13.73
  -8  -7   8   35.82   18.48
  -8   7   8   49.87   19.40
   8  -7   8   39.48   17.17
   8  -7   9   22.78   18.98
  -8  -7   9   35.09   20.43
  -8   7   9   32.84   20.62
   8   7   9   32.73   18.50
  -8   8   0  523.30   34.94
   8   8   0  584.62   34.18
  -8  -8   0  541.19   33.86
  -8   8   0  598.23   34.04
  -8  -8   0  585.29   28.66
  -8   8   1   14.85    6.54
  -8   8  -1    7.94    6.65
  -8   8   1    4.66    8.01
  -8  -8   1    7.49    5.47
  -8  -8  -1    3.68    6.45
  -8   8  -1   -2.80    7.29
   8   8  -1    6.80    6.97
   8   8   1    0.40    5.95
  -8  -8   1   -2.47    5.82
  -8  -8  -1    8.92    3.00
  -8  -8  -2 3012.94  133.61
  -8  -8   2 3150.57  130.78
   8   8   2 2985.19  134.16
  -8   8   2 3136.30  137.78
  -8   8   2 3045.82  132.82
   8  -8   2 3190.83  138.53
   8  -8   2 3182.11  133.17
  -8  -8   2 3139.18  136.48
  -8  -8   3   42.81   10.93
  -8  -8   3   40.35   11.91
  -8   8   3   23.31   10.21
   8  -8   3   35.82   11.28
   8   8   3   40.37   11.33
   8  -8   3   34.14   12.02
  -8   8   3   42.49    8.54
  -8  -8   3   33.40   10.22
   8   8   4   36.21   11.58
  -8   8   4   29.09    8.08
  -8   8   4   35.78   13.40
   8  -8   4   40.15   13.50
  -8  -8   4   50.43   13.72
  -8   8   5    3.97    6.40
  -8  -8   5   14.56   10.68
   8   8   5   -3.88    9.25
  -8   8   5    0.58   12.55
   8  -8   5    3.80   10.17
   8   8   6  425.79   37.29
  -8  -8   6  409.93   36.77
   8  -8   6  433.93   38.62
  -8   8   6  396.80   38.64
   8  -8   7    0.24   10.69
   8   8   7   -3.39   10.16
  -8   8   7   13.84   13.47
  -8  -8   7    7.62   12.93
  -8   8   8  308.09   38.71
   8  -8   8  216.75   33.32
  -8  -8   8  262.97   35.49
   8   8   8  261.16   34.21
   8   8   9   30.88   18.97
  -8   8   9   21.63   18.79
  -8  -8   9   32.88   18.44
   8  -8   9    7.14   16.58
  -8   9   0   34.93   12.24
   8   9   0   36.57   10.47
  -8  -9   0   30.81    9.75
  -8   9   0   35.41    9.50
  -8   9   1  982.83   49.22
  -8   9   1  874.34   52.52
   8   9   1  880.81   50.32
  -8   9  -1  912.77   53.10
  -8  -9   1 1034.39   47.69
  -8  -9  -1 1004.19   51.87
  -8   9  -1  951.11   50.82
   8   9  -1 1040.31   52.78
  -8  -9   1  929.63   50.05
  -8   9   2   30.81    7.98
  -8  -9   2   36.79   10.91
   8  -9   2   44.08   12.14
  -8   9   2   44.61   13.05
   8  -9   2   36.27   12.13
  -8  -9   2   47.07   12.02
  -8   9  -2   47.11   11.91
  -8  -9  -2   45.27   11.27
   8   9   2   51.44   11.74
  -8   9   3  921.08   45.23
   8  -9   3  919.39   51.85
  -8  -9   3  724.36   47.31
   8   9   3  969.18   51.54
   8  -9   3  905.83   53.70
  -8  -9   3  972.83   49.39
  -8  -9   3  828.53   50.75
  -8   9   3  987.30   54.51
  -8   9   4  179.40   15.78
  -8   9   4  168.46   24.51
  -8  -9   4  162.77   22.14
   8  -9   4  171.87   24.18
   8   9   4  146.35   20.67
   8  -9   5   41.67   14.47
   8   9   5   67.81   17.06
  -8   9   5   74.52   18.94
  -8  -9   5   43.89   15.18
   8   9   6   43.49   16.31
  -8   9   6   34.80   16.93
   8  -9   6   47.94   17.18
  -8  -9   6   72.94   19.10
   8   9   7   26.29   15.38
   8  -9   7   16.59   15.53
  -8   9   7   37.10   18.37
  -8  -9   7   13.94   15.02
   8   9   8  -11.27   12.94
  -8   9   8  -11.58   14.29
  -8  -9   8  -28.78   12.18
   8  -9   8   12.15   16.24
  -8   9   9  108.22   28.55
   8  -9   9   79.36   25.19
   8   9   9   40.06   20.84
  -8  -9   9  100.64   27.02
   8  10   0  383.58   29.24
  -8 -10   0  415.09   29.53
  -8  10   0  409.07   32.23
  -8  10   0  459.28   28.80
  -8  10   1   34.01    9.09
  -8 -10   1   54.45   12.45
   8 -10   1   65.46    8.03
   8  10  -1   60.22   13.20
  -8  10   1   68.13   15.94
  -8 -10  -1   58.09   13.35
  -8  10  -1   71.24   13.10
   8  10   1   63.55   13.33
  -8  10  -1   52.21   14.52
   8  10   2 2039.47   98.22
  -8  10  -2 2101.25  101.29
  -8 -10   2 2199.75   96.29
  -8  10   2 2140.18  101.62
  -8  10  -2 1945.46   97.75
  -8  10   2 2123.46   93.51
  -8 -10  -2 2091.07   97.66
  -8 -10  -3    2.39    8.24
  -8  10   3   21.74   13.58
   8  10   3   32.77   12.33
   8 -10   3    7.99   10.37
  -8 -10   3   22.92   11.94
  -8 -10   3   14.15   10.61
  -8  10   3   18.44    6.38
  -8 -10   3   23.18   10.04
   8 -10   3   15.41   11.55
   8 -10   4   -5.04   10.81
   8  10   4   10.13   11.45
  -8 -10   4    4.79   10.41
  -8  10   4    5.08   14.71
   8 -10   4   16.99   12.19
   8 -10   5   50.77   16.76
  -8  10   5  137.58   26.35
  -8 -10   5  105.57   20.98
   8  10   5   89.01   19.73
  -8 -10   6  578.98   44.96
   8  10   6  597.47   44.60
   8 -10   6  531.82   44.46
  -8  10   6  532.41   47.34
  -8  10   7   30.58   18.69
  -8 -10   7  -12.73   15.45
   8 -10   7   -4.25   13.40
   8  10   7   14.90   14.50
  -8  10   8  394.00   45.21
  -8 -10   8  442.83   45.17
   8 -10   8  340.36   42.89
   8  10   8  305.67   39.91
   8  11   0  130.98   20.08
  -8 -11   0  153.59   19.73
  -8  11   0  186.79   18.59
  -8  11   0  114.80   20.52
  -8  11   1 1233.73   59.47
   8  11  -1 1192.32   64.68
   8  11   1 1226.71   64.41
  -8 -11  -1 1114.18   61.75
  -8  11   1 1147.57   66.09
  -8  11  -1 1149.54   65.84
  -8  11  -1 1151.56   61.22
   8 -11   1 1242.66   53.16
  -8  11   2   17.64    7.32
  -8  11  -2  -11.21    9.93
   8  11   2   -2.08    9.02
  -8  11   2    2.49   10.13
  -8  11  -2    3.02    7.66
  -8 -11  -2   -4.87    9.17
  -8 -11   2   -4.80    7.26
   8  11  -2   18.43   11.05
  -8 -11  -3  409.77   32.62
  -8 -11   3  438.76   31.13
  -8 -11   3  458.11   34.64
   8 -11   3  445.05   38.87
  -8 -11   3  481.10   36.94
   8  11   3  396.05   33.22
  -8  11   3  482.89   37.70
   8 -11   3  484.09   37.05
  -8 -11   4   -1.50    9.38
   8  11   4    7.65   11.08
   8 -11   4    0.16   10.15
   8 -11   4   19.11   12.29
  -8  11   4    9.47   12.25
  -8 -11   4    2.92   10.49
   8 -11   5   73.03   20.16
   8 -11   5   69.37   18.01
  -8 -11   5   90.15   20.94
   8  11   5   84.84   20.23
  -8  11   5   47.10   19.24
   8 -11   6   -3.85   12.58
   8  11   6    0.15   12.28
  -8  11   6   -1.05   14.04
  -8 -11   6   13.92   14.15
   8  11   7   12.76   14.81
  -8 -11   7   15.42   16.30
  -8  11   7   -6.84   15.57
   8 -11   7    6.52   14.96
   8  11   8   44.34   20.92
  -8  11   8   86.88   24.34
  -8 -11   8   57.06   22.63
   8 -11   8   36.43   20.69
   8  12   0  404.56   32.46
  -8  12   0  480.05   30.45
  -8 -12   0  354.11   31.16
  -8  12   0  380.19   35.78
  -8  12  -1  175.37   25.63
   8  12  -1  163.86   23.12
  -8 -12  -1  135.66   20.83
  -8  12   1  185.86   17.72
   8  12   1  138.14   21.34
  -8  12   1  119.00   22.46
  -8  12  -1  139.26   18.30
  -8 -12  -2 1689.74   83.48
  -8  12   2 1670.83   87.65
   8  12  -2 1747.24   86.70
  -8  12  -2 1542.57   81.98
   8  12   2 1611.85   84.38
  -8  12  -2 1506.31   85.95
  -8 -12   2 1786.78   81.94
  -8 -12   3  -15.96    9.18
  -8 -12   3    6.64    9.21
  -8  12   3    2.71   11.58
   8  12   3    7.40   10.22
  -8 -12   3  -10.25    9.37
  -8 -12  -3   19.18   12.04
   8 -12   4   39.52   16.19
   8 -12   4   60.32   19.49
  -8 -12   4   24.98   15.36
  -8 -12   4   39.13   15.29
  -8  12   4   50.74   18.72
   8  12   4   78.44   19.12
  -8 -12   5   14.52   14.78
  -8  12   5   -8.06   13.48
   8 -12   5   14.61   13.09
  -8 -12   5   12.96   14.55
   8 -12   5   -1.83   12.04
   8  12   5   -2.25   11.18
  -8 -12   6  242.83   33.52
   8 -12   6  292.59   35.82
   8  12   6  221.31   31.77
   8 -12   6  180.17   31.57
  -8  12   6  194.43   33.54
   8 -12   7   15.14   16.70
   8  12   7    2.69   15.11
  -8 -12   7    9.34   17.87
  -8  12   7   -3.51   17.01
   8  12   8  140.80   28.80
  -8  12   8  158.09   32.06
   8 -12   8  143.29   31.48
  -8 -12   8  112.63   28.90
  -8 -13   0   38.71   13.24
  -8  13   0   25.81   14.22
   8  13   0   33.19   13.53
  -8  13   0   34.33   10.68
  -8 -13  -1  579.06   39.69
  -8  13  -1  600.00   44.67
  -8  13  -1  554.17   36.80
   8  13   1  488.27   39.09
  -8  13   1  630.61   44.96
   8  13  -1  495.33   40.39
   8  13  -2   13.93   12.26
  -8 -13  -2    7.17   10.76
  -8  13  -2   13.19   10.96
  -8 -13   2   30.11   12.69
  -8  13  -2   20.52   13.78
   8  13   2   28.88   13.32
  -8  13   2    3.31   13.08
  -8  13   3  664.02   48.22
  -8 -13  -3  596.41   42.28
  -8  13  -3  534.56   41.12
  -8 -13   3  640.41   40.55
   8  13   3  636.38   44.57
   8  13  -3  628.61   44.86
  -8  13  -3  643.31   47.63
   8 -13   4   10.63   13.61
   8  13   4   35.50   15.61
  -8  13   4   26.99   16.23
  -8 -13  -4    8.05   11.85
  -8 -13   4   34.59   16.05
   8 -13   4   -2.70   12.24
  -8 -13   4   17.38   15.01
  -8  13   5   89.96   24.43
  -8 -13   5   98.71   24.28
   8 -13   5   74.09   22.03
  -8 -13   5   93.22   22.72
   8 -13   5   88.35   22.46
   8  13   5  128.58   24.15
  -8 -13   6   19.74   16.60
   8  13   6   23.48   16.90
  -8 -13   6   49.24   19.34
   8 -13   6   25.22   15.13
   8 -13   6   14.73   15.29
  -8  13   6  -19.36   16.97
   8  13   7    0.28   15.74
   8 -13   7   10.72   17.88
  -8 -13   7   15.16   17.98
  -8  13   7   34.84   22.30
   8 -13   7    5.23   15.01
  -8 -14   0  116.46   20.43
   8  14   0  112.75   21.54
  -8  14   0  125.63   24.65
  -8  14  -1   27.15   14.79
   8  14  -1    6.05   12.17
  -8 -14  -1  -12.18    9.46
  -8  14   1    7.67   12.67
   8  14   1   -2.09   11.07
  -8  14  -1    7.14    8.40
  -8 -14   1    3.42   10.66
  -8  14  -2 1220.11   72.01
   8  14   2 1047.61   66.30
  -8 -14   2 1163.73   63.53
  -8  14   2 1113.93   70.36
   8  14  -2 1256.43   70.76
  -8 -14  -2 1140.18   65.49
  -8  14  -3  114.50   25.51
   8  14   3  208.49   28.49
  -8  14   3  120.91   25.50
  -8  14  -3  122.05   20.77
  -8 -14  -3  169.73   25.66
  -8 -14  -4   28.52   14.13
  -8 -14   4  -16.75   12.16
   8  14   4   28.23   14.67
  -8  14   4    7.58   16.19
  -8  14   5   40.99   20.43
   8 -14   5   29.49   17.35
  -8 -14   5   44.15   18.99
   8  14   5   46.38   19.07
   8 -14   5   62.89   20.77
  -8 -14  -5   58.52   18.56
  -8 -14   5   71.90   21.98
  -8 -14   6  392.81   42.63
  -8 -14   6  312.02   40.48
   8 -14   6  307.48   40.33
   8  14   6  294.95   37.87
  -8  14   6  354.47   44.18
   8 -14   6  298.76   41.93
   8  14   7   31.99   20.98
  -8 -14   7    3.80   17.91
  -8 -14   7  -17.59   15.70
  -8  14   7    4.13   17.98
   8 -14   7   15.35   19.81
   8 -14   7  -11.70   15.48
  -8 -15   0   73.69   17.76
  -8  15   0   98.56   23.34
   8  15   0  107.28   22.01
   8  15  -1  437.67   40.81
  -8  15   1  409.19   42.12
   8  15   1  472.32   40.98
  -8  15  -1  413.86   42.60
  -8 -15  -1  379.19   35.52
  -8 -15   1  404.27   35.11
  -8  15  -2    3.79   10.99
   8  15  -2   -2.51   11.88
  -8  15  -2   -5.54   13.76
   8  15   2   11.52   13.12
  -8 -15  -2    9.95   11.78
  -8  15   2    5.56   13.61
   8  15   3  422.24   40.25
   8  15  -3  404.38   41.16
  -8  15  -3  443.56   36.50
  -8  15   3  404.46   43.25
  -8 -15  -3  520.39   39.82
  -8  15  -3  418.06   43.45
   8  15  -4   22.85   16.11
  -8  15  -4   64.36   21.05
  -8  15  -4   62.93   17.29
  -8  15   4   32.12   19.90
   8  15   4   32.16   17.05
  -8 -15  -4   37.51   16.91
  -8 -15  -5   64.44   19.32
   8  15   5   53.56   19.15
   8 -15   5   57.06   20.00
   8 -15   5   45.05   20.72
  -8 -15   5   78.64   24.33
  -8  15   5   32.94   20.48
  -8 -15   5   67.70   22.42
   8 -15   6   -6.76   16.12
  -8  15   6   17.79   18.90
  -8 -15   6   -4.65   16.64
   8  15   6  -15.04   13.41
  -8 -15   6   31.05   19.42
   8 -15   6   -0.93   16.14
  -8 -15  -6    8.58   12.60
   8  16   0  164.84   27.98
  -8  16   0  135.43   27.03
  -8 -16  -1   50.18   16.93
  -8  16  -1   94.82   23.78
  -8 -16   1   57.76   17.34
   8  16   1   66.30   18.75
   8  16  -1   11.09   13.71
  -8  16   1   51.85   19.78
  -8  16   2  851.86   62.11
   8  16   2  897.14   60.58
   8  16  -2  843.10   60.28
  -8  16  -2 1041.62   66.87
  -8 -16  -2  857.80   57.06
   8  16  -3    5.57   14.35
  -8  16   3   18.59   17.55
  -8  16  -3   -1.57   15.74
  -8 -16  -3   13.30   13.19
   8  16   3   30.44   16.46
   8  16  -4   12.21   15.02
  -8 -16  -4    0.76   13.21
  -8  16   4  -12.86   15.42
  -8  16  -4   15.58   13.73
   8  16   4    1.48   13.49
  -8  16  -4    7.45   16.87
  -8  16  -5   16.33   18.39
   8  16   5   23.70   16.84
  -8  16   5    8.66   20.46
   8  16  -5   -8.94   12.63
  -8 -16  -5   14.27   14.50
  -8  16   6  220.28   37.73
  -8 -16   6  151.03   33.30
   8 -16   6  167.26   33.56
   8  16   6  112.09   27.74
   8 -16   6  150.11   34.12
  -8 -16  -6   84.25   21.83
  -8 -16   6  196.46   34.40
  -8  17   0   89.20   23.99
   8  17   0   98.96   25.59
   8  17  -1  416.92   43.01
   8  17   1  369.58   41.49
  -8  17  -1  416.51   46.36
  -8  17   1  510.11   48.69
  -8 -17  -1  492.63   42.27
   8  17  -2    5.18   15.83
  -8 -17  -2  -11.05   11.69
  -8  17  -2   22.81   18.64
  -8  17   2   21.28   18.78
   8  17   2    6.26   14.29
  -8  17  -3  249.30   37.87
  -8 -17  -3  213.68   31.85
   8  17   3  258.21   35.18
  -8  17   3  210.73   36.20
   8  17  -3  309.36   38.03
   8  17   4    8.77   14.55
  -8  17  -4    5.90   18.31
   8  17  -4    2.99   15.23
  -8  17   4   15.88   20.08
  -8 -17  -4   16.58   15.15
   8  17  -5   17.49   16.99
  -8  17  -5   25.97   19.39
  -8  17   5   35.96   22.44
   8  17   5    8.70   16.15
  -8 -17  -5    5.54   14.89
  -8  17  -5    2.18   14.75
  -8  18   0  106.27   29.01
   8  18   0   92.17   24.78
  -8  18  -1    3.68   16.36
   8  18   1   -6.21   12.89
   8  18  -1   -5.44   13.88
  -8  18   1   19.41   18.46
  -8 -18  -1    0.83   14.48
   8  18   2  725.18   54.00
  -8  18   2  624.58   58.26
  -8  18  -2  558.07   55.83
  -8 -18  -2  560.81   48.65
   8  18  -2  601.37   54.58
   8  18  -3   34.86   19.77
  -8  18  -3   15.96   17.38
  -8  18   3    7.58   17.51
   8  18   3   23.91   17.19
  -8 -18  -3   31.96   17.39
  -8  18   4   16.68   20.71
  -8  18  -4    7.88   19.45
   8  18  -4    6.50   16.27
  -8 -18  -4    7.43   15.18
   8  18   4   11.74   17.64
   8  19   0   10.81   14.79
  -8  19   0    9.33   19.72
  -8  19   1  103.64   28.35
   8  19  -1  120.69   27.43
   8  19   1  184.01   31.27
  -8  19  -1  164.22   33.77
  -8  19   2  -22.22   16.74
  -8  19  -2   37.87   21.03
   8  19  -2   20.23   18.15
  -8 -19  -2   23.29   17.66
   8  19   2   13.25   16.90
  -8  19   3  203.57   35.98
  -8  19  -3  220.04   37.94
   8  19   3  155.93   31.71
   8  19  -3  193.81   35.09
  -9   0   0    5.25    5.85
  -9   0   0    0.98    4.82
  -9   0  -1 1838.47   82.03
   9   0   1 1884.24   75.92
  -9   0   1 1925.34   76.19
  -9   0  -1 1897.41   77.75
  -9   0   1 1743.24   81.83
  -9   0   2   14.46    5.44
  -9   0  -2   -1.10    5.29
  -9   0   2   23.38    7.23
  -9   0  -2   10.27    5.27
   9   0   2   13.76    5.51
  -9   0   3  873.28   46.52
  -9   0   3  943.29   44.59
   9   0   3  882.51   43.73
  -9   0   4   25.17    9.12
  -9   0   4   33.34    9.53
   9   0   4   30.37    8.83
  -9   0   5 1095.79   59.76
   9   0   5 1074.91   57.12
  -9   0   5 1163.56   58.52
  -9   0   6  122.11   20.09
   9   0   6  103.48   17.89
  -9   0   6  111.12   19.06
  -9   0   7  140.38   22.78
   9   0   7  156.74   22.81
  -9   0   7  133.65   22.90
  -9   0   8   -2.66   12.30
   9   0   8   11.45   12.33
   9   0   9  764.19   53.66
  -9   0   9  642.83   52.51
   9   0  10   34.17   17.22
  -9   0  10    7.43   17.69
  -9   1   0   -5.54    3.23
  -9   1   0   -3.08    4.04
  -9  -1   0   -1.84    5.31
  -9  -1   0   -5.53    4.81
  -9   1   0   -3.05    4.90
  -9  -1  -1  402.53   23.15
  -9  -1   1  396.35   22.93
  -9   1   1  364.77   19.03
  -9  -1   1  377.55   18.42
  -9  -1   1  373.57   22.98
  -9   1  -1  404.34   20.57
  -9   1   1  391.06   23.63
   9  -1   1  376.71   19.39
  -9   1  -1  380.42   23.43
  -9  -1  -1  416.45   22.18
   9   1   1  384.53   18.33
  -9   1  -2  929.99   46.24
  -9  -1   2  953.30   42.28
  -9  -1  -2  966.65   43.54
   9   1   2  938.94   41.93
  -9   1   2  895.78   45.78
  -9  -1   2  786.18   45.00
  -9  -1  -2  905.35   44.62
   9  -1   2  971.27   42.73
  -9   1  -2  942.35   41.10
   9   1   3  226.22   17.04
  -9  -1   3  234.54   17.36
   9  -1   3  234.20   17.43
  -9  -1   3  245.47   19.87
  -9   1   3  256.49   19.72
  -9   1   3  222.76   17.38
   9   1   4  813.82   43.85
  -9  -1   4  830.41   46.68
  -9   1   4  840.80   46.26
  -9   1   4  842.60   44.66
   9  -1   4  873.79   44.81
  -9  -1   4  865.54   44.69
  -9  -1   5  485.92   34.41
  -9  -1   5  473.78   32.67
  -9   1   5  499.20   33.39
  -9   1   5  480.50   32.53
   9  -1   5  501.09   32.46
   9   1   5  458.52   31.27
  -9  -1   6  621.99   40.84
  -9   1   6  644.26   42.18
   9  -1   6  586.54   39.74
   9   1   6  619.18   40.22
  -9   1   6  704.14   42.82
  -9  -1   6  546.45   40.68
  -9  -1   7  185.99   26.03
   9   1   7  172.42   23.81
  -9  -1   7  123.45   21.85
  -9   1   7  164.76   24.11
  -9   1   7  158.90   23.63
   9  -1   7  145.89   22.65
  -9   1   8  268.29   33.75
   9  -1   8  395.26   36.84
  -9  -1   8  441.22   39.80
   9   1   8  314.78   34.06
   9  -1   9  169.34   29.21
  -9   1   9  189.55   30.71
  -9  -1   9  172.50   29.60
   9   1   9  153.82   27.83
   9  -1  10  209.37   34.26
  -9  -1  10  302.33   39.68
  -9   1  10  300.61   40.52
   9   1  10  287.95   38.69
  -9  -2   0   -9.33    3.84
  -9  -2   0   -1.25    4.89
  -9   2   0    3.03    5.67
  -9   2   0   -2.76    4.43
   9   2   0    0.01    2.61
  -9  -2  -1 1752.47   77.01
   9  -2   1 1885.50   76.38
  -9   2  -1 1823.48   80.97
  -9  -2   1 1783.26   78.23
  -9   2   1 1811.76   75.88
  -9   2  -1 1808.31   73.89
  -9   2   1 1820.44   80.85
  -9  -2   1 1793.24   74.51
   9   2   1 1800.78   74.09
  -9  -2   1 1810.17   79.86
  -9   2  -2    9.34    4.18
  -9  -2  -2   16.11    5.34
  -9  -2   2   17.51    5.55
   9  -2   2   10.31    5.60
  -9  -2  -2   17.04    6.42
  -9  -2   2    8.76    6.22
  -9   2  -2   16.95    7.25
   9   2   2   12.34    4.73
  -9   2   2   11.10    6.17
  -9   2   3   44.80    9.83
   9  -2   3   19.02    6.93
  -9  -2   3   21.50    7.23
  -9   2  -3   34.44    6.05
   9   2   3   20.04    7.05
  -9  -2   3   19.53    7.86
  -9   2   3   48.79    9.94
  -9  -2   4   83.45   12.92
   9   2   4  108.10   13.49
  -9  -2   4   88.15   14.77
  -9   2   4   79.77   13.33
   9  -2   4   98.12   13.63
  -9   2   4   62.56   12.13
   9   2   5 1058.43   56.22
  -9  -2   5 1064.71   57.20
   9  -2   5 1183.31   58.58
  -9  -2   5 1111.02   60.84
  -9   2   5 1013.17   56.67
  -9   2   5 1120.57   58.45
  -9   2   6    9.77    9.85
  -9   2   6   26.84   11.68
  -9  -2   6    8.54   10.06
   9  -2   6    7.76    9.92
   9   2   6    7.51    9.15
  -9  -2   6    6.63    9.21
  -9   2   7  536.53   38.75
   9  -2   7  507.08   38.51
   9   2   7  474.74   37.39
  -9   2   7  455.23   37.98
  -9  -2   7  587.07   42.77
  -9  -2   7  496.62   38.36
  -9   2   8    6.61   11.70
  -9   2   8   34.32   15.01
   9  -2   8  -12.97    9.32
  -9  -2   8   13.13   14.02
   9   2   8   26.35   13.94
   9  -2   9  539.63   48.76
  -9   2   9  645.35   50.17
  -9  -2   9  629.19   49.97
   9   2   9  630.43   48.88
  -9  -2  10   32.46   18.52
   9  -2  10   36.92   18.15
  -9   2  10   16.32   17.64
   9   2  10   50.80   21.76
   9   3   0    5.00    3.87
  -9  -3   0   -0.54    5.31
  -9  -3   0   -0.84    1.76
  -9   3   0   -6.98    5.57
  -9   3   0   -6.81    4.18
   9  -3   1 1574.12   69.95
  -9  -3   1 1568.14   71.74
   9   3   1 1598.61   67.38
  -9   3  -1 1485.14   72.86
  -9  -3   1 1686.46   68.50
   9  -3   1 1622.59   67.38
  -9  -3  -1 1630.49   70.96
  -9  -3  -1 1653.24   70.48
  -9  -3   1 1615.83   71.36
  -9   3   1 1676.08   73.65
  -9  -3  -2   30.44    8.30
  -9   3  -2   44.70    5.18
   9  -3   2   41.09    8.28
  -9  -3  -2   42.66    7.46
   9   3   2   46.03    7.39
  -9  -3   2   33.31    8.57
  -9   3   2   43.69    9.45
  -9  -3   2   30.54    6.91
  -9   3   2   38.03    8.17
  -9   3  -2   41.71    9.55
   9   3   3  453.39   27.40
  -9  -3  -3  547.72   28.14
  -9  -3   3  495.32   31.24
   9  -3   3  479.43   28.88
  -9   3   3  475.49   29.15
  -9   3  -3  497.16   23.57
  -9   3   3  493.68   29.64
  -9  -3   3  481.59   27.97
  -9  -3   4  838.83   44.45
  -9   3   4  811.46   44.68
   9   3   4  775.03   43.28
   9  -3   4  823.77   44.70
  -9  -3   4  846.13   47.53
  -9   3   4  857.57   45.40
  -9   3   5  259.37   24.61
  -9  -3   5  357.45   28.21
   9  -3   5  240.51   23.79
  -9   3   5  262.78   23.53
  -9  -3   5  224.15   22.86
   9   3   5  261.17   23.37
  -9  -3   6 1317.93   67.34
  -9  -3   6 1234.28   69.35
  -9   3   6 1215.87   65.71
   9  -3   6 1203.46   65.94
  -9   3   6 1174.74   65.81
   9   3   6 1196.44   64.83
  -9   3   7   25.11   11.91
  -9  -3   7   24.75   13.22
   9  -3   7   45.40   14.81
  -9  -3   7   28.83   14.52
   9   3   7   15.43   11.54
  -9   3   7   41.78   15.41
  -9   3   8  304.69   32.77
   9  -3   8  249.04   32.04
  -9   3   8  302.58   34.66
  -9  -3   8  274.48   33.03
   9   3   8  230.72   30.21
   9  -3   9  141.90   27.66
  -9   3   9  170.04   30.67
   9   3   9  222.93   32.38
  -9  -3   9  290.25   36.22
  -9  -3  10  126.43   28.78
  -9   3  10  115.87   27.97
   9  -3  10  147.17   29.94
   9   3  10  112.21   27.86
  -9  -4   0    0.13    4.44
   9   4   0    5.57    4.76
  -9   4   0   -4.33    5.78
  -9   4   0   -0.82    2.84
  -9  -4   0   -5.73    5.33
  -9  -4   1  768.52   39.68
  -9  -4  -1  848.32   37.34
   9  -4   1  725.48   38.58
   9  -4   1  753.92   37.08
   9   4   1  823.76   36.68
  -9  -4   1  799.73   35.81
  -9  -4  -1  819.46   40.19
  -9   4   1  732.94   38.23
  -9  -4   1  752.90   36.95
  -9  -4   1  762.02   38.82
  -9   4  -1  765.11   40.98
  -9   4   1  766.52   40.36
  -9  -4  -2   44.07    7.33
  -9  -4   2   62.24   10.94
  -9  -4  -2   55.23   10.22
   9  -4   2   54.31   10.23
  -9   4  -2   44.07    3.91
  -9   4   2   54.82   10.06
  -9  -4   2   47.48    9.62
   9   4   2   45.61    7.93
  -9   4   2   45.87    9.16
  -9   4  -2   38.16    9.14
  -9  -4   2   33.18    7.25
  -9  -4  -3  196.69   14.70
  -9   4   3  197.17   18.36
  -9  -4   3  210.27   19.64
  -9  -4   3  187.06   16.68
   9   4   3  178.83   16.26
  -9   4  -3  189.38   10.75
  -9   4   3  221.65   17.54
   9  -4   3  175.42   17.43
  -9   4   4    7.89    6.31
  -9   4   4    4.51    7.45
   9   4   4    8.40    6.78
  -9  -4   4    3.31    7.74
   9  -4   4    0.58    6.54
  -9  -4   4   -7.82    5.56
   9  -4   5 1298.63   66.31
  -9   4   5 1308.81   64.76
  -9  -4   5 1390.46   70.39
  -9  -4   5 1123.40   63.94
   9   4   5 1142.22   63.36
  -9   4   5 1427.04   67.60
  -9   4   6   76.35   15.70
  -9   4   6   99.80   19.03
  -9  -4   6   65.96   15.75
   9  -4   6   74.04   16.07
  -9  -4   6   57.87   15.66
   9   4   6   73.33   15.87
  -9   4   7  121.36   20.12
   9  -4   7  108.58   20.76
  -9   4   7  122.15   22.33
   9   4   7  173.77   24.02
  -9  -4   7  124.65   23.04
   9  -4   8   20.82   14.32
  -9   4   8   17.38   12.17
  -9  -4   8   17.38   15.02
  -9   4   8    7.14   14.46
   9   4   8   -5.72   10.58
   9   4   9  409.44   42.65
  -9   4   9  457.89   45.80
  -9  -4   9  544.44   48.19
   9  -4   9  414.69   43.29
  -9  -5   0    1.72    5.77
   9   5   0    1.14    4.33
  -9   5   0    7.94    6.85
  -9  -5   0   -4.22    4.22
  -9   5   0   -1.36    5.57
  -9  -5  -1  375.02   24.33
  -9  -5   1  360.70   21.25
   9   5   1  362.92   21.51
  -9   5  -1  368.19   24.89
   9  -5   1  295.68   22.99
  -9  -5   1  379.54   22.43
  -9  -5  -1  411.89   20.42
  -9   5   1  351.64   23.74
  -9  -5   1  344.52   23.68
  -9   5   1  405.83   24.63
   9  -5   1  345.75   22.90
  -9  -5   2  442.76   26.94
  -9  -5  -2  442.04   22.67
  -9   5   2  409.98   27.56
  -9  -5  -2  450.37   27.45
  -9   5  -2  438.93   28.39
   9  -5   2  422.41   27.01
   9   5   2  428.66   25.91
  -9   5   2  386.27   25.72
  -9  -5   2  390.25   26.52
  -9  -5   3  431.48   28.96
  -9  -5   3  457.92   27.09
  -9   5   3  382.63   27.73
   9   5   3  381.55   25.41
   9  -5   3  422.05   27.53
  -9  -5  -3  403.47   22.79
  -9   5   3  415.88   26.22
  -9   5   4  842.19   44.27
   9  -5   4  809.59   45.90
  -9  -5   4  748.16   46.64
  -9   5  -4  830.17   35.09
  -9  -5   4  855.65   45.63
   9   5   4  838.35   44.85
  -9  -5  -4  820.71   40.83
  -9   5   4  789.96   45.77
   9   5   5  398.64   29.96
  -9   5   5  419.83   31.98
   9  -5   5  408.96   31.40
  -9   5   5  462.94   29.81
  -9  -5   5  426.86   31.32
  -9  -5   5  395.44   32.82
   9  -5   6  494.98   37.56
  -9  -5   6  486.53   39.67
  -9   5   6  476.78   36.84
  -9  -5   6  536.79   37.86
  -9   5   6  494.37   35.02
   9   5   6  528.88   36.93
   9   5   7   26.85   13.13
  -9   5   7   43.66   13.52
  -9   5   7   27.40   15.20
  -9  -5   7   35.74   15.55
   9  -5   7   27.69   14.41
  -9   5   8  103.23   21.13
   9  -5   8  101.59   22.98
  -9  -5   8   77.63   21.10
  -9   5   8   78.01   21.70
   9   5   8   81.30   20.61
  -9  -5   9  168.45   30.87
  -9   5   9  223.19   34.16
   9  -5   9  187.55   31.55
   9   5   9  176.29   29.24
   9   6   0   -7.03    4.05
  -9  -6   0    2.99    4.39
  -9   6   0   -5.24    5.10
  -9   6   0   -1.90    6.06
  -9  -6   0    8.74    6.41
   9   6   1  513.04   29.21
  -9   6  -1  529.70   31.64
  -9  -6  -1  543.85   25.62
  -9   6  -1  538.75   32.20
  -9  -6   1  521.34   30.88
  -9  -6  -1  537.92   31.58
  -9  -6   1  546.87   29.22
  -9   6   1  518.49   30.74
  -9   6   1  412.96   29.92
  -9  -6   2   36.50    9.08
  -9   6  -2   34.61    9.57
  -9   6   2   20.77    7.64
  -9  -6  -2   22.03    8.23
  -9  -6  -2   34.37    5.42
  -9  -6   2   22.87    8.14
  -9   6   2   34.80    9.57
   9  -6   2   15.38    8.03
   9  -6   2   17.10    8.47
   9   6   2   32.09    8.46
  -9  -6   2   34.25    8.45
   9   6   3   31.98    9.00
  -9   6   3   30.52   10.65
  -9   6   3   34.83    8.36
  -9  -6  -3   41.15    6.54
  -9  -6   3   31.47    9.94
  -9  -6   3   35.71    9.90
   9  -6   3   21.26    8.81
   9   6   4   43.49   11.35
   9  -6   4   47.24   13.26
  -9  -6  -4   55.26    8.20
  -9   6   4   45.00   13.57
  -9  -6   4   36.13   11.87
  -9   6   4   30.64    8.39
  -9  -6   4   41.24   10.58
  -9  -6   5 1484.46   73.96
  -9  -6  -5 1391.04   66.62
   9  -6   5 1469.05   75.12
  -9  -6   5 1424.24   76.31
   9   6   5 1453.00   73.54
  -9   6   5 1479.41   70.86
  -9   6   5 1418.84   75.04
   9  -6   6   40.76   14.97
  -9   6   6   39.55   15.40
  -9   6   6   90.47   15.43
   9   6   6   55.23   14.98
  -9  -6   6   62.43   16.07
  -9   6   7  175.10   22.65
  -9   6   7  192.39   28.39
   9   6   7  140.82   23.86
  -9  -6   7  175.54   26.48
   9  -6   7  221.42   28.90
   9   6   8   25.97   15.03
   9  -6   8   43.54   18.33
  -9  -6   8   63.19   20.19
  -9   6   8   52.88   19.05
  -9   6   9  427.00   46.81
   9  -6   9  363.26   42.80
  -9  -6   9  510.65   48.12
   9   6   9  384.79   42.73
  -9  -7   0    7.46    7.09
  -9  -7   0   -1.50    4.02
   9   7   0   -5.99    4.26
  -9   7   0    1.52    6.15
  -9   7   0   -1.99    6.61
  -9  -7  -1 1076.08   54.66
  -9   7  -1 1060.82   55.22
  -9  -7   1 1117.61   52.21
  -9   7   1 1092.86   54.06
   9   7  -1 1096.01   53.82
  -9   7  -1 1069.57   55.68
  -9  -7   1 1071.75   54.10
  -9   7   1 1040.42   55.35
   9   7   1 1056.20   52.74
  -9  -7  -1 1129.14   47.60
  -9  -7  -2   49.62   11.70
  -9  -7   2   57.29   11.44
  -9   7   2   44.70   12.00
   9   7   2   80.19   12.18
   9  -7   2   55.41   12.47
  -9   7   2   44.62    9.77
  -9  -7   2   70.38   12.18
  -9  -7   2   48.59   10.28
   9  -7   2   43.43   11.63
  -9  -7   2   65.27   12.25
  -9   7  -2   32.48   10.14
  -9  -7  -2   55.75    5.57
  -9  -7   3   46.59   10.07
  -9  -7   3   61.07   13.18
   9   7   3   63.69   11.96
  -9  -7   3   91.41   14.42
  -9  -7  -3   79.03    7.49
   9  -7   3   88.07   14.89
  -9   7   3   84.21   11.65
  -9   7   3   74.46   14.71
  -9  -7  -4  860.67   41.74
   9   7   4  920.90   50.03
  -9  -7   4  926.80   52.53
   9  -7   4  843.19   51.37
  -9  -7   4  939.37   50.53
  -9   7   4 1040.38   53.72
  -9   7   4  836.68   46.19
   9  -7   5  388.44   32.32
   9   7   5  372.60   30.14
  -9   7   5  390.45   26.91
  -9  -7   5  388.25   31.19
  -9   7   5  393.10   34.20
  -9  -7   5  395.18   33.25
  -9   7   6 1169.47   64.88
   9   7   6 1014.39   60.35
  -9   7   6  985.11   55.83
   9  -7   6 1023.35   61.87
  -9  -7   6 1080.97   62.17
  -9   7   7   63.53   18.69
  -9  -7   7  112.72   22.33
   9   7   7   81.41   19.21
   9  -7   7   56.41   17.47
   9   7   8  386.06   39.12
  -9  -7   8  372.69   39.72
   9  -7   8  263.32   35.65
  -9   7   8  353.75   40.56
   9   7   9  214.53   33.34
   9  -7   9  155.33   31.41
  -9   7   9  225.12   35.74
  -9  -7   9  130.16   29.08
  -9  -8   0    4.21    4.50
  -9   8   0    4.05    7.87
  -9   8   0    0.23    6.08
  -9  -8   0   -8.27    5.56
   9   8   0   -2.79    5.07
   9   8  -1  644.86   36.79
  -9   8  -1  668.90   37.62
   9   8   1  633.43   35.97
  -9   8   1  587.34   34.79
  -9   8   1  586.54   37.96
  -9  -8  -1  623.97   28.60
  -9  -8   1  585.94   33.03
  -9  -8   1  666.48   37.27
  -9  -8  -1  651.46   37.62
  -9   8  -1  549.63   37.26
  -9   8   2   37.72    9.21
  -9  -8   2   14.45    8.60
  -9   8   2   38.19   11.64
   9  -8   2   14.11    8.74
   9   8   2   38.81   10.35
  -9  -8   2   37.39   10.21
   9  -8   2   27.61   10.50
  -9  -8   2   29.22   10.26
  -9   8  -2   25.12    9.92
  -9  -8  -2   29.74   10.15
  -9   8   3    6.99   10.15
  -9  -8   3   -1.79    4.30
  -9  -8   3   -7.79    6.34
   9  -8   3   13.04    9.43
  -9  -8   3   17.86    8.93
   9   8   3    8.33    7.87
   9  -8   3    6.97    8.90
  -9   8   3   13.25    6.24
  -9   8   4    1.22    5.58
   9   8   4   22.67   10.32
  -9   8   4   29.32   13.15
  -9  -8   4   18.56   11.44
  -9  -8   4   36.18   12.73
   9  -8   4   20.53   11.16
   9  -8   5 1152.33   65.74
  -9   8   5 1103.95   65.76
   9   8   5 1134.90   63.26
  -9   8   5 1158.13   57.89
  -9  -8   5 1158.64   63.46
   9  -8   6   25.06   14.07
  -9  -8   6   34.56   14.26
  -9   8   6   23.36   14.96
   9   8   6   35.52   14.20
  -9  -8   7  395.51   39.57
  -9   8   7  418.69   41.72
   9   8   7  478.24   41.59
   9  -8   7  457.90   42.45
  -9  -8   8   -0.05   14.33
   9  -8   8    4.73   14.65
  -9   8   8   28.80   17.77
   9   8   8   -6.11   12.02
  -9   8   9  383.63   46.49
   9   8   9  437.10   45.79
   9  -8   9  343.02   43.52
  -9  -8   9  377.15   44.06
  -9   9   0    8.27    6.49
  -9  -9   0   -0.28    4.01
  -9  -9   0   -5.20    5.90
  -9   9   0   12.30    9.45
   9   9   0    5.31    6.62
   9   9   1  267.44   22.75
  -9  -9  -1  236.13   13.34
   9   9  -1  261.08   22.98
  -9  -9   1  275.59   23.29
  -9  -9  -1  222.67   22.41
  -9   9   1  250.61   19.83
  -9   9  -1  236.04   21.95
  -9   9   1  233.82   24.58
  -9   9  -1  238.55   24.92
  -9  -9   1  264.33   18.49
  -9  -9   2  262.59   24.33
  -9  -9   2  324.29   25.66
  -9   9  -2  234.87   23.17
   9  -9   2  289.79   26.80
  -9   9   2  269.02   20.30
  -9   9   2  241.33   25.36
  -9  -9   2  303.00   21.99
  -9  -9  -2  270.35   25.66
   9  -9   2  270.82   27.26
   9   9   2  284.46   23.26
   9  -9   3  201.17   23.13
  -9  -9   3  132.55   19.59
  -9  -9   3  148.51   19.95
  -9  -9   3  180.78   19.87
  -9  -9   3  179.64   19.71
   9  -9   3  168.50   22.67
  -9   9   3  162.00   15.63
  -9   9   3  125.55   20.81
   9   9   3  171.39   20.29
  -9  -9  -3  117.79   19.04
   9  -9   4  950.73   55.42
  -9  -9   4  892.87   52.37
  -9   9   4  846.41   45.17
   9   9   4  817.56   50.33
  -9   9   4  905.94   54.31
   9  -9   5  353.87   34.41
  -9   9   5  350.26   34.55
  -9  -9   5  350.94   32.78
   9   9   5  331.09   31.63
   9   9   6  445.51   37.02
  -9   9   6  457.11   41.47
  -9  -9   6  395.65   37.81
   9  -9   6  466.63   41.49
   9   9   7   10.40   13.52
   9  -9   7   26.23   15.52
  -9   9   7   20.37   17.59
  -9  -9   7   21.01   14.94
   9  -9   8  143.03   28.57
   9   9   8  194.87   31.43
  -9   9   8  166.32   29.82
  -9  -9   8  152.55   29.95
   9   9   9  177.41   31.69
   9  -9   9  134.43   30.37
  -9   9   9  136.50   31.28
  -9  -9   9  219.33   35.36
   9  10   0   -9.65    5.71
  -9  10   0    4.86    7.08
  -9  10   0   -1.81    9.22
  -9 -10   0   11.15    8.76
  -9  10  -1 1071.09   53.28
  -9  10  -1  897.26   54.48
   9  10   1  984.90   52.61
  -9  10   1  971.80   55.76
  -9 -10   1 1053.93   53.03
  -9 -10  -1  843.49   51.30
  -9  10   1  919.58   49.45
   9  10  -1  860.67   51.52
   9  10   2   27.49   10.43
  -9  10   2   19.70   12.03
  -9 -10  -2   27.89   11.12
  -9  10  -2   25.87   12.70
   9  10  -2   30.56   10.58
  -9 -10   2    3.43    4.96
  -9  10  -2   46.56   11.67
  -9  10   2   25.10    8.41
  -9  10   3  292.71   30.49
  -9 -10   3  313.13   29.62
  -9 -10  -3  320.97   29.33
   9 -10   3  314.48   30.41
  -9 -10   3  318.69   25.64
  -9 -10   3  306.85   28.59
   9 -10   3  317.64   31.38
   9  10   3  295.13   27.54
  -9  10   3  283.52   21.01
   9 -10   4   26.77   13.04
   9 -10   4   21.07   13.01
   9  10   4    9.46   11.17
  -9  10   4    4.80   15.52
  -9 -10   4   39.33   13.85
  -9 -10   4   48.20   13.93
  -9 -10   5  652.38   46.24
   9 -10   5  663.32   48.09
   9  10   5  652.02   45.63
  -9  10   5  710.21   50.12
   9 -10   6   74.86   20.43
   9  10   6   60.87   18.30
  -9 -10   6   76.26   20.12
  -9  10   6   82.64   22.37
   9  10   7  213.74   31.35
  -9 -10   7  170.97   29.12
   9 -10   7  181.85   30.17
  -9  10   7  203.94   35.21
  -9  10   8   57.31   21.50
  -9 -10   8   16.96   20.42
   9  10   8   22.27   16.47
   9 -10   8   -3.11   15.15
   9  11   0    4.05    8.22
  -9 -11   0    3.99    7.44
  -9  11   0    0.73    7.22
  -9  11   0   -0.58   10.28
  -9  11  -1  480.31   32.59
   9  11  -1  470.09   34.84
  -9  11   1  457.31   30.08
  -9 -11   1  486.53   33.13
  -9 -11  -1  486.95   34.57
  -9  11  -1  444.09   36.55
  -9  11   1  544.66   38.78
   9  11   1  438.79   33.43
  -9  11   2  193.95   25.32
   9  11  -2  173.66   22.95
  -9  11  -2  123.86   19.52
  -9 -11   2  171.27   20.32
   9  11   2  165.80   21.87
  -9  11   2  160.34   16.56
  -9 -11  -2  161.80   21.95
  -9  11  -2  172.53   24.73
   9 -11   3   69.49   18.24
  -9 -11   3  100.29   19.20
  -9  11   3   90.11   20.17
   9 -11   3   72.40   18.10
  -9 -11  -3   82.77   17.63
   9  11   3   67.81   16.42
  -9 -11   3   76.50   15.32
  -9 -11   3   94.43   18.88
  -9 -11   4  432.20   36.10
  -9  11   4  452.17   39.31
   9 -11   4  367.61   36.86
   9 -11   4  412.60   37.49
  -9 -11   4  396.59   36.10
   9  11   4  388.22   34.76
  -9 -11   5  200.28   28.64
  -9  11   5  209.08   30.21
   9 -11   5  201.57   29.38
   9 -11   5  235.95   30.90
   9  11   5  235.74   29.21
  -9  11   6  731.44   54.53
   9 -11   6  630.96   51.51
   9  11   6  716.42   51.49
  -9 -11   6  783.88   53.67
   9 -11   7   47.68   19.67
  -9 -11   7   37.42   20.65
  -9  11   7   53.53   22.35
   9  11   7   48.81   19.56
   9 -11   8  384.85   45.97
  -9 -11   8  457.70   47.51
   9  11   8  367.86   44.05
  -9  11   8  454.92   49.03
   9  12   0   -6.66    8.47
  -9  12   0   18.12    8.72
  -9 -12   0    3.79   10.23
  -9  12   0   -8.59   10.30
  -9 -12  -1  147.98   22.23
  -9 -12   1  175.53   21.78
  -9  12   1  180.91   18.60
  -9  12  -1  160.53   25.24
   9  12   1  178.08   23.40
  -9  12   1  172.33   25.78
  -9  12  -1  198.89   21.69
   9  12  -1  196.06   24.65
  -9 -12   2    1.27    8.91
  -9 -12  -2   12.74   10.28
   9  12  -2   -5.17   10.59
  -9  12   2    4.24   12.83
  -9  12  -2    5.32    9.60
   9  12   2    0.78   10.46
  -9  12  -2    0.83   11.42
  -9 -12   3   22.13   13.12
  -9 -12  -3   32.74   14.16
  -9  12   3   41.50   16.46
   9  12   3   33.09   14.17
  -9 -12   3   47.62   12.82
  -9  12  -3   36.86   13.51
  -9 -12   3   46.94   16.05
   9 -12   4   20.30   14.28
   9  12   4   46.97   15.33
  -9 -12   4   39.89   14.99
  -9 -12  -4   25.33   14.18
   9 -12   4   36.22   15.35
  -9 -12   4   34.35   15.60
  -9  12   4   10.61   14.45
  -9  12   5  775.21   56.09
  -9 -12   5  839.53   55.96
   9 -12   5  819.50   57.20
  -9 -12   5  695.74   50.90
   9  12   5  865.95   55.04
   9 -12   5  731.21   52.85
  -9  12   6    2.92   17.86
   9 -12   6   -6.12   13.71
   9 -12   6   13.14   14.82
  -9 -12   6   31.58   17.98
   9  12   6   14.38   14.87
   9 -12   7  251.25   37.85
  -9  12   7  352.87   43.05
  -9 -12   7  302.86   38.64
   9  12   7  191.28   32.08
  -9  12   8   27.62   21.07
   9 -12   8  -12.78   15.50
   9  12   8  -10.52   15.12
  -9 -12   8   12.90   18.26
  -9 -13   0   15.97   10.82
   9  13   0   -5.50    9.56
  -9  13   0    8.82    8.37
  -9  13   0    7.63   12.58
  -9  13   1  127.16   23.90
  -9  13  -1  106.66   22.74
   9  13  -1  116.18   21.55
  -9  13  -1   97.26   17.48
   9  13   1  146.08   22.75
  -9 -13  -1  107.49   19.51
  -9  13  -2  232.54   30.84
  -9 -13   2  265.32   26.46
  -9 -13  -2  235.23   27.50
   9  13  -2  199.19   27.80
  -9  13  -2  198.50   24.52
  -9  13   2  194.72   28.82
   9  13   2  230.05   27.50
   9  13   3   49.46   16.15
  -9  13  -3   41.05   17.04
  -9 -13  -3   61.44   17.03
   9  13  -3   29.53   13.29
  -9  13  -3   53.56   15.40
  -9  13   3   38.10   17.39
  -9 -13   3   58.89   15.42
  -9  13   4  490.01   44.02
  -9 -13   4  366.09   37.59
   9 -13   4  463.74   43.50
  -9 -13   4  427.70   39.86
  -9 -13  -4  367.87   36.36
   9 -13   4  366.83   39.40
   9  13   4  420.65   38.94
  -9 -13   5  294.34   35.73
   9 -13   5  206.50   32.43
   9  13   5  246.30   31.47
  -9  13   5  207.59   33.30
   9 -13   5  195.02   29.89
  -9 -13   5  251.09   32.92
  -9 -13  -5  166.96   27.38
  -9 -13   6  463.71   45.85
   9 -13   6  331.63   40.81
  -9  13   6  464.17   48.06
   9  13   6  398.80   41.87
   9 -13   6  420.44   44.60
  -9 -13   6  437.33   43.29
  -9 -13   7   12.81   17.74
  -9  13   7   11.91   19.30
   9 -13   7    9.08   17.80
  -9 -13   7   28.18   18.54
   9  13   7   32.74   18.73
   9 -13   7   21.37   18.22
  -9 -14   0    4.35   12.09
   9  14   0    1.76   12.10
  -9  14   0    0.48   12.65
   9  14   1  509.08   39.72
   9  14  -1  510.11   40.80
  -9  14  -1  474.17   35.96
  -9  14   1  541.03   43.67
  -9  14  -1  536.19   43.83
  -9 -14  -1  522.21   39.07
   9  14  -2   -2.43   12.35
  -9 -14  -2    2.02   12.41
  -9  14  -2   21.93   15.04
  -9  14  -2    7.55   11.67
  -9  14   2   -1.83   13.49
  -9 -14   2    1.46   11.10
   9  14   2   37.72   14.68
  -9 -14  -3  332.22   34.34
  -9  14  -3  288.66   31.21
   9  14   3  293.56   33.04
   9  14  -3  285.29   34.31
  -9  14  -3  349.77   38.51
  -9  14   3  328.82   37.23
  -9  14  -4   12.48   14.74
  -9 -14  -4    0.26   12.40
  -9  14  -4   18.70   13.68
  -9  14   4   13.51   16.56
   9  14   4   34.90   16.52
   9 -14   5  376.73   42.07
  -9 -14   5  397.83   41.91
   9 -14   5  369.36   42.61
  -9 -14   5  404.32   42.38
  -9 -14  -5  359.79   38.55
  -9  14   5  412.27   45.03
   9  14   5  408.80   40.88
  -9 -14   6   34.53   21.54
  -9 -14  -6   71.68   21.66
  -9 -14   6   53.15   21.88
   9 -14   6   27.86   20.43
  -9  14   6   73.04   25.00
   9  14   6   59.21   20.39
   9 -14   6   75.40   22.76
  -9 -14   7   55.76   23.97
   9  14   7   90.93   25.77
   9 -14   7   37.89   20.84
   9 -14   7  -15.84   17.18
  -9  14   7   64.31   24.96
  -9 -14   7   43.13   21.83
  -9 -15   0   10.12   11.40
   9  15   0    2.49   11.40
  -9  15   0    0.84   14.39
  -9  15  -1  110.51   25.14
  -9 -15  -1  145.55   24.27
  -9 -15   1  134.75   22.42
   9  15  -1  187.54   28.04
  -9  15   1  161.57   29.25
   9  15   1  146.36   25.07
  -9  15  -2   66.68   22.46
  -9  15   2  115.15   25.87
   9  15  -2  126.25   24.34
  -9  15  -2   95.20   19.48
   9  15   2  135.94   24.56
  -9 -15  -2  129.85   23.40
  -9  15  -3  120.30   21.86
  -9  15   3   85.21   23.16
   9  15  -3  133.96   25.26
   9  15   3   69.82   19.54
  -9  15  -3  116.96   25.54
  -9 -15  -3  116.37   22.86
  -9 -15  -4  362.65   37.73
  -9  15   4  322.25   40.97
   9  15   4  370.13   39.13
  -9  15  -4  318.63   34.16
   9  15  -4  283.42   35.41
  -9  15  -4  298.74   38.97
  -9 -15   5  141.15   27.93
  -9 -15   5  199.59   33.06
   9 -15   5  123.97   29.39
  -9  15   5  132.69   30.68
   9  15   5  144.60   27.32
   9 -15   5  139.21   28.86
  -9 -15  -5  172.19   28.98
  -9 -15  -6  287.13   36.63
   9 -15   6  282.94   41.75
   9  15   6  261.12   36.74
  -9 -15   6  243.42   37.72
  -9 -15   6  212.52   36.52
  -9  15   6  237.11   40.26
   9 -15   6  275.09   40.71
   9  16   0   -3.54   13.56
  -9 -16   0   -6.37   11.75
  -9  16   0   22.04   16.27
  -9  16  -1  106.64   25.82
   9  16  -1   97.36   22.95
  -9 -16   1  120.22   22.90
  -9 -16  -1  126.52   23.80
  -9  16   1  103.29   26.36
   9  16   1  109.23   23.66
   9  16   2   10.78   14.54
  -9  16   2   17.59   16.36
  -9  16  -2   13.80   17.16
  -9 -16  -2   25.88   15.06
   9  16  -2   20.49   16.22
   9  16  -3    8.83   14.06
  -9 -16  -3    4.33   13.79
  -9  16  -3   17.28   18.82
  -9  16   3   24.44   17.68
   9  16   3   25.42   14.94
  -9  16  -4   22.20   14.42
   9  16  -4   30.62   16.69
  -9  16   4   21.58   18.79
  -9 -16  -4    7.14   13.94
   9  16   4   29.43   16.75
  -9  16  -4   61.18   22.09
  -9  16  -5  425.51   47.05
  -9 -16  -5  478.63   44.55
   9  16   5  413.08   43.68
  -9  16  -5  367.78   40.85
   9  16  -5  415.33   43.38
  -9  16   5  487.65   50.48
  -9 -16   6    4.38   21.68
  -9 -16   6   15.94   21.73
   9 -16   6   20.40   21.70
   9 -16   6   24.56   19.27
  -9 -17   0    0.41   10.31
  -9  17   0   -1.23   15.25
   9  17   0    1.07   14.05
   9  17   1  114.31   23.97
   9  17  -1  151.60   28.38
  -9 -17  -1  150.25   27.16
  -9  17   1  125.34   28.82
  -9  17  -1  197.29   33.37
  -9 -17  -2   -9.72   13.32
   9  17   2   17.76   13.81
   9  17  -2    4.50   13.47
  -9  17  -2   12.09   18.55
  -9  17   2   17.92   17.22
  -9  17  -3   27.50   20.33
   9  17  -3   30.47   17.00
  -9 -17  -3   -5.04   13.60
   9  17   3   21.18   14.79
  -9  17   3   -0.38   17.21
  -9  17   4  193.72   34.12
  -9  17  -4  187.53   33.48
   9  17   4  212.02   32.90
  -9 -17  -4  155.71   28.26
   9  17  -4  164.99   30.42
  -9  17  -5  158.85   32.03
  -9 -17  -5   97.21   25.18
  -9  17  -5  140.29   27.81
   9  17  -5  139.11   27.47
   9  17   5  101.92   26.14
  -9  17   5  107.40   28.58
  -9  18   0    5.78   17.10
   9  18   0   20.71   17.87
  -9 -18  -1  172.55   28.76
   9  18   1  195.57   32.37
  -9  18   1  226.77   36.58
  -9  18  -1  208.86   35.89
   9  18  -1  144.40   29.17
  -9 -18  -2   12.01   15.28
   9  18   2   19.46   16.66
  -9  18  -2   17.13   18.16
  -9  18   2   -0.73   16.73
   9  18  -2   13.45   16.35
  -9 -18  -3   27.98   17.87
   9  18   3   65.42   20.54
   9  18  -3   70.29   21.41
  -9  18  -3   60.71   23.64
  -9  18   3   55.79   21.72
   9  18  -4   14.14   17.18
  -9  18  -4   -7.10   16.25
   9  18   4  -23.56   14.37
  -9 -18  -4   17.60   16.55
  -9  18   4    7.25   18.76
  -9  19   0   44.63   20.51
   9  19   0    2.47   15.85
   9  19   1   44.73   19.61
  -9  19   1   83.14   23.86
  -9  19  -1   18.80   18.17
   9  19  -1   78.19   23.73
  -9 -19  -2   63.96   22.77
  -9  19   2   77.47   26.86
  -9  19  -2   33.07   19.78
   9  19  -2   43.20   21.23
   9  19   2   50.02   20.97
 -10   0   0  342.94   22.16
 -10   0   0  358.66   20.78
 -10   0  -1  147.27   12.04
 -10   0   1  116.58   13.28
 -10   0   1  160.35    9.70
  10   0   1  139.56    9.26
 -10   0  -1  143.81   13.86
 -10   0   2  232.81   18.24
 -10   0  -2  203.62   14.82
  10   0   2  202.84   14.10
 -10   0   2  236.63   14.80
 -10   0  -2  205.26   16.65
  10   0   3  948.22   43.68
 -10   0   3  930.51   47.38
 -10   0  -3 1022.90   43.46
 -10   0   3  694.97   41.75
  10   0   4  648.80   36.26
 -10   0   4  628.55   36.15
 -10   0   4  644.23   38.66
 -10   0   5   37.44   12.19
 -10   0   5   75.32   13.90
  10   0   5   78.97   13.77
 -10   0   6  198.98   24.96
  10   0   6  238.63   24.46
 -10   0   6  207.26   24.23
 -10   0   7   13.58   11.80
  10   0   7    2.15   10.16
 -10   0   7   34.32   14.17
 -10   0   8  100.99   22.61
  10   0   8   49.54   16.34
 -10   0   8   73.43   20.00
 -10   0   9   42.36   20.47
  10   0   9   12.41   15.64
  10   0  10  343.41   41.74
 -10   0  10  363.87   43.20
 -10   1   0   26.25    7.99
 -10   1   0   35.75    6.74
 -10  -1   0   27.56    7.62
 -10   1   0   27.20    4.40
 -10  -1   0   31.89    7.72
 -10  -1   1  608.47   26.74
 -10   1  -1  610.24   29.30
 -10  -1  -1  553.03   30.22
 -10  -1   1  658.41   33.29
 -10   1   1  626.05   33.30
  10  -1   1  596.87   27.73
 -10  -1   1  586.12   31.64
 -10   1   1  595.24   27.67
  10   1   1  599.48   26.57
 -10   1  -1  605.59   33.14
 -10  -1  -1  599.85   32.15
 -10   1   2 1836.53   77.85
 -10  -1  -2 1838.48   78.20
 -10   1  -2 1825.84   76.02
 -10  -1  -2 1867.61   81.33
 -10   1   2 1815.99   82.73
 -10   1  -2 1759.47   82.25
  10   1   2 1846.24   77.08
  10  -1   2 1823.39   77.67
 -10  -1   2 1753.40   82.27
 -10  -1   2 1863.74   77.45
 -10  -1   3 1396.61   67.45
 -10   1  -3 1360.19   60.36
 -10  -1  -3 1455.92   65.98
 -10   1   3 1364.89   66.65
  10   1   3 1367.99   62.86
  10  -1   3 1410.24   63.45
 -10   1   3 1379.65   63.59
 -10   1   4  139.49   17.53
 -10  -1   4  132.04   17.23
  10   1   4  132.37   15.03
 -10  -1   4  172.02   16.91
 -10   1   4  160.59   16.73
  10  -1   4  156.61   16.17
 -10  -1   5  208.69   22.84
 -10   1   5  173.03   20.55
  10  -1   5  156.19   18.88
  10   1   5  174.57   19.13
 -10   1   5  180.76   20.16
 -10  -1   5  209.65   20.89
 -10  -1   6  647.01   42.44
 -10   1   6  619.79   40.61
 -10   1   6  557.37   39.87
  10   1   6  531.04   37.44
 -10  -1   6  540.12   38.40
  10  -1   6  590.83   38.88
 -10   1   7   30.99   14.09
 -10  -1   7   36.41   14.45
 -10  -1   7   -4.83    9.44
 -10   1   7   16.11   12.20
  10   1   7    9.25   10.17
  10  -1   7   12.69   12.52
 -10   1   8  285.65   32.88
 -10  -1   8  239.38   31.77
  10  -1   8  228.04   30.18
 -10   1   8  281.90   33.28
  10   1   8  268.88   31.44
  10   1   9   44.25   16.96
 -10  -1   9   40.86   19.05
 -10   1   9   42.92   19.88
  10  -1   9   22.21   15.45
 -10   1  10   26.18   18.21
 -10  -1  10   14.99   16.33
  10   1  10  -15.87   15.55
  10  -1  10   23.07   17.21
 -10   2   0 3938.01  155.40
 -10   2   0 3727.14  162.24
  10   2   0 3925.86  153.31
 -10  -2   0 3759.99  156.34
 -10  -2   0 3918.56  160.95
  10   2   1  492.21   23.60
 -10   2   1  557.84   30.77
  10  -2   1  532.30   26.03
 -10  -2   1  466.15   28.73
 -10   2   1  512.82   25.52
 -10  -2   1  534.85   29.44
 -10   2  -1  536.05   25.23
 -10  -2   1  537.44   24.32
 -10   2  -1  513.79   29.89
 -10  -2  -1  509.19   28.26
 -10  -2  -2  624.60   34.06
 -10  -2   2  671.13   36.65
  10   2   2  685.31   32.27
 -10  -2   2  656.60   32.23
  10  -2   2  692.59   33.47
 -10   2  -2  652.53   30.59
 -10   2   2  674.07   36.42
 -10   2  -2  666.54   36.92
 -10  -2   3  540.73   33.67
  10  -2   3  567.09   30.87
 -10   2   3  531.03   30.62
 -10   2  -3  540.23   27.07
 -10   2   3  559.27   32.94
  10   2   3  554.42   29.80
 -10   2   4  171.64   18.35
 -10  -2   4  162.07   19.11
  10   2   4  159.95   16.27
 -10  -2   4  165.46   17.02
  10  -2   4  136.64   15.89
 -10   2   4  166.00   17.76
  10   2   5   -0.04    6.27
  10  -2   5   20.24    8.87
 -10  -2   5    9.46    8.02
 -10   2   5    6.33    7.20
 -10   2   5   25.52    9.54
 -10  -2   5    2.48    7.43
 -10  -2   6   -4.86    7.95
  10  -2   6   -7.50    8.08
 -10   2   6    7.57    9.77
 -10   2   6    0.34    9.64
 -10  -2   6    2.08    9.41
  10   2   6    6.00    8.43
  10  -2   7    6.25   10.50
 -10   2   7   -0.97   10.05
 -10  -2   7    6.39   10.74
 -10  -2   7    8.29   11.07
  10   2   7   -7.98    7.67
 -10   2   7   -5.78    9.58
 -10   2   8    9.48   14.14
 -10   2   8   -0.73   12.34
  10   2   8    5.47   11.50
 -10  -2   8   -4.50   12.23
  10  -2   8   -1.47   10.41
  10  -2   9   48.89   17.38
  10   2   9   40.32   16.63
 -10  -2   9   12.02   17.94
 -10   2   9    4.20   14.44
 -10   2  10  129.00   30.04
 -10  -2  10  103.65   26.59
  10  -2  10  123.65   28.47
  10   2  10  153.58   30.56
  10   3   0   56.22    5.94
 -10   3   0   75.21    8.75
 -10  -3   0   37.21    8.84
 -10   3   0   34.27    9.01
 -10   3   1 1327.23   58.82
  10  -3   1 1326.18   56.78
 -10  -3  -1 1365.95   60.32
 -10   3  -1 1296.20   63.03
 -10  -3   1 1315.67   57.03
 -10  -3   1 1405.34   61.67
 -10  -3   1 1304.09   61.17
  10   3   1 1297.65   56.28
 -10   3   1 1293.01   62.71
  10  -3   1 1369.69   59.33
 -10  -3  -1 1354.18   60.64
 -10  -3   2 2520.60  103.72
 -10   3  -2 2505.40   96.02
  10   3   2 2422.40  100.00
 -10  -3  -2 2353.64  102.11
 -10  -3  -2 2423.21  102.58
 -10   3   2 2443.42  105.78
 -10  -3   2 2276.44  100.04
 -10   3  -2 2327.48  106.31
  10  -3   2 2378.26  101.80
 -10  -3   2 2249.60  104.93
 -10  -3  -3  895.87   43.19
 -10   3   3  860.04   43.82
 -10  -3   3  902.64   47.52
  10  -3   3  875.21   44.28
  10   3   3  839.42   42.32
 -10   3  -3  871.17   38.22
 -10   3   3  828.66   45.27
 -10   3   4  167.16   17.85
 -10   3   4  160.57   17.79
  10   3   4  149.76   16.21
 -10  -3   4  130.40   16.02
  10  -3   4  215.37   18.98
 -10  -3   4  168.88   19.85
  10   3   5    2.53    7.30
 -10  -3   5   13.50    9.18
 -10   3   5    8.80    7.40
 -10   3   5   26.22   10.82
  10  -3   5   12.77    8.50
 -10  -3   5   23.28   10.93
 -10   3   6  550.24   38.83
 -10  -3   6  601.29   42.88
  10  -3   6  579.48   39.91
 -10   3   6  609.93   40.77
 -10  -3   6  602.49   40.10
  10   3   6  601.17   39.33
 -10  -3   7   -1.58   11.71
 -10   3   7    7.93   10.83
  10  -3   7   33.13   14.13
 -10  -3   7    0.60   12.25
 -10   3   7   33.74   14.50
  10   3   7   37.25   13.61
 -10  -3   8  242.12   32.05
 -10   3   8  289.66   31.92
 -10   3   8  317.47   35.09
  10  -3   8  211.05   29.74
  10   3   8  222.89   30.14
  10   3   9   36.67   16.53
  10  -3   9   10.29   15.07
 -10  -3   9   28.07   17.19
 -10   3   9   52.31   19.77
  10  -3  10   -0.04   16.23
 -10   3  10   20.64   19.18
  10   3  10  -14.64   15.70
 -10  -3  10   24.69   17.98
 -10   4   0 2657.60  121.39
 -10  -4   0 2777.19  117.86
  10   4   0 2833.16  114.91
 -10  -4   0 2920.37  118.48
 -10  -4  -1  354.03   22.68
  10  -4   1  313.06   20.45
 -10  -4   1  339.89   19.79
 -10  -4   1  327.30   21.64
 -10   4  -1  381.68   24.30
  10  -4   1  319.99   21.45
 -10  -4  -1  371.78   20.55
  10   4   1  339.39   18.98
 -10   4   1  301.65   22.24
 -10  -4   1  357.76   19.09
 -10  -4   1  330.20   22.86
 -10   4  -2 1522.12   62.11
 -10  -4  -2 1557.29   68.61
 -10  -4   2 1554.48   72.60
 -10   4   2 1542.53   70.20
 -10  -4  -2 1528.58   70.94
 -10  -4   2 1530.52   71.11
  10  -4   2 1568.53   70.67
 -10   4  -2 1610.15   74.42
  10   4   2 1530.26   67.94
 -10   4   2 1560.56   72.10
 -10  -4   2 1579.59   68.59
 -10   4  -3  360.38   17.22
 -10   4   3  305.01   23.24
  10  -4   3  376.02   24.64
 -10   4   3  322.75   24.10
 -10  -4  -3  360.91   21.54
 -10  -4   3  324.41   22.24
  10   4   3  396.26   23.31
 -10  -4   3  358.39   25.55
 -10  -4   4  400.43   26.94
 -10   4   4  390.69   26.96
  10  -4   4  382.99   27.12
 -10  -4  -4  398.70   24.49
  10   4   4  385.08   26.09
 -10  -4   4  351.02   28.66
 -10   4  -4  404.35   20.07
 -10   4   4  339.00   26.43
  10  -4   5   28.71   10.83
 -10  -4   5   47.64   12.91
 -10   4   5   45.18   12.72
 -10  -4   5   23.17   12.67
  10   4   5   23.57   10.22
 -10   4   5   41.58   11.12
 -10   4   6    7.51   10.68
 -10  -4   6    5.47    9.65
  10  -4   6   11.73   11.09
 -10  -4   6   -2.78    9.36
  10   4   6    5.48    9.10
 -10   4   6   10.51    9.98
 -10   4   7   51.48   17.02
 -10   4   7   60.55   15.01
  10   4   7   31.16   14.86
 -10  -4   7   64.04   17.17
  10  -4   7   22.53   14.11
 -10  -4   7   55.33   18.15
  10   4   8    2.57   11.47
 -10   4   8   -9.27   12.85
 -10   4   8   15.71   13.56
  10  -4   8   15.71   13.63
 -10  -4   8   -4.31   11.85
  10   4   9    7.48   13.87
 -10   4   9   41.91   18.57
 -10  -4   9   37.51   18.79
  10  -4   9   54.04   19.43
 -10  -5   0   35.24    9.07
 -10   5   0   35.93    8.70
 -10  -5   0   27.45    6.60
  10   5   0   31.76    6.88
 -10   5   0   20.35    8.29
 -10  -5  -1  974.58   49.77
 -10  -5   1 1021.72   47.55
  10   5   1 1033.96   46.94
 -10   5  -1  957.15   50.93
 -10  -5  -1 1056.75   46.28
  10  -5   1 1087.57   48.53
 -10   5   1 1039.61   51.11
  10  -5   1  980.99   49.71
 -10   5   1  941.62   48.80
 -10  -5   1  996.69   45.57
 -10  -5   1  977.56   49.70
 -10   5  -2 2584.94  119.18
 -10   5   2 2664.67  115.96
  10   5   2 2649.17  113.22
 -10  -5   2 2678.99  117.69
 -10  -5   2 2802.28  116.24
 -10  -5  -2 2695.31  115.95
 -10  -5  -2 2748.77  112.75
 -10  -5   2 2658.03  114.20
  10  -5   2 2676.29  116.47
 -10   5   2 2677.83  117.66
 -10  -5  -3  898.77   43.52
 -10   5   3  921.90   47.57
  10   5   3  967.77   46.72
  10  -5   3  903.40   48.21
 -10   5   3  862.63   47.56
 -10  -5   3  968.01   47.26
 -10  -5   3  894.19   49.51
 -10  -5  -4   88.12   10.80
 -10   5   4   80.92   13.21
 -10  -5   4   79.18   13.53
  10  -5   4   87.73   14.80
  10   5   4   67.59   12.70
 -10  -5   4   62.04   13.26
 -10   5   4   77.30   14.71
 -10   5  -4   82.65    6.64
  10   5   5  158.64   20.03
 -10  -5   5  167.85   21.07
 -10   5   5  248.45   24.86
  10  -5   5  166.48   21.48
 -10   5   5  218.21   20.93
 -10  -5   5  228.61   25.40
 -10  -5   6  406.84   37.99
 -10   5   6  509.52   35.01
 -10   5   6  470.28   36.34
  10   5   6  460.23   34.57
  10  -5   6  453.57   35.70
 -10  -5   6  497.79   36.05
 -10   5   7   72.05   16.40
 -10  -5   7   96.80   20.67
  10  -5   7   78.14   18.75
  10   5   7   65.72   17.33
 -10   5   7  107.16   21.52
 -10   5   8  263.19   35.23
 -10  -5   8  341.78   36.42
  10   5   8  330.58   35.29
  10  -5   8  239.33   32.52
 -10   5   8  275.24   30.77
 -10   5   9   95.56   24.88
 -10  -5   9   94.91   23.59
  10  -5   9  101.22   25.03
  10   5   9  168.55   29.11
  10   6   0 3736.59  155.64
 -10   6   0 3737.08  161.14
 -10  -6   0 3695.67  156.55
 -10   6   0 3846.89  158.96
 -10  -6   0 3787.91  155.97
 -10   6  -1  304.92   22.74
 -10  -6   1  328.25   23.47
 -10  -6  -1  324.23   18.12
 -10  -6   1  280.50   19.99
 -10  -6  -1  283.09   22.16
 -10   6   1  305.85   22.34
 -10   6  -1  323.94   23.76
  10   6   1  327.30   21.09
 -10   6   1  327.64   23.78
  10   6   2  480.80   27.79
 -10   6   2  470.51   28.81
  10  -6   2  424.48   29.19
 -10  -6   2  462.76   28.94
 -10  -6  -2  487.02   23.91
 -10   6  -2  433.66   30.35
 -10   6   2  402.53   28.65
 -10  -6   2  441.28   29.22
  10  -6   2  465.50   28.66
 -10  -6  -2  481.09   30.40
 -10  -6  -3  402.55   27.94
 -10  -6   3  330.71   24.40
 -10  -6   3  369.78   27.01
 -10   6   3  369.55   24.98
  10   6   3  339.35   24.27
 -10  -6  -3  366.96   20.75
 -10   6   3  366.78   26.67
  10  -6   3  350.84   26.36
 -10  -6  -4  299.89   19.81
  10   6   4  368.93   26.22
 -10   6   4  341.81   24.12
 -10  -6   4  353.50   28.44
  10  -6   4  278.09   26.17
 -10   6   4  298.24   27.60
 -10  -6   4  337.69   25.32
  10   6   5   67.91   14.82
 -10  -6   5   90.12   17.78
 -10  -6   5   51.81   15.57
  10  -6   5   67.38   16.18
 -10  -6  -5   65.49   10.67
 -10   6   5   93.91   14.29
 -10   6   5   79.39   17.42
 -10   6   6   12.78   12.02
 -10  -6   6   33.17   13.05
 -10   6   6   24.93   10.84
 -10  -6   6   35.13   14.44
  10   6   6   66.44   16.01
  10  -6   6   22.64   11.94
 -10  -6   7    7.79   12.53
 -10   6   7   21.45   14.35
  10  -6   7   12.99   12.26
  10   6   7   39.48   15.19
 -10   6   7   11.93   11.42
  10   6   8    7.63   14.12
  10  -6   8   29.70   15.77
 -10  -6   8   29.61   16.08
 -10   6   8   51.22   18.76
 -10   6   8   19.77   13.59
  10  -6   9   38.81   18.70
  10   6   9   68.74   20.47
 -10  -6   9   39.67   20.49
 -10   6   9   59.54   23.44
 -10   7   0    9.78    7.34
 -10  -7   0    3.03    6.48
 -10   7   0   17.86    7.68
  10   7   0   11.69    6.59
 -10  -7   0    3.33    4.73
 -10  -7  -1 2070.11   84.14
 -10   7   1 1948.27   90.77
 -10  -7   1 1959.97   87.95
  10   7   1 1978.04   88.20
  10   7  -1 1958.18   89.03
 -10  -7  -1 1987.94   90.41
 -10   7   1 1993.07   91.49
 -10   7  -1 1992.13   92.15
 -10   7  -1 1864.34   90.84
 -10  -7   1 2106.71   90.53
 -10  -7   2 1910.82   87.01
 -10   7   2 1911.71   89.11
  10  -7   2 2020.61   86.56
 -10   7  -2 1909.54   90.44
  10  -7   2 1881.22   89.43
 -10  -7   2 1846.63   86.59
 -10  -7   2 1791.34   86.83
  10   7   2 1941.24   86.18
 -10   7   2 1839.71   86.84
 -10  -7  -2 1978.83   88.76
 -10  -7  -2 1956.11   79.94
 -10  -7   2 1889.59   83.46
 -10  -7   3  520.19   33.44
  10  -7   3  562.73   35.61
 -10  -7   3  605.43   35.47
 -10  -7  -3  533.10   26.08
 -10   7   3  470.30   33.69
 -10   7   3  514.54   31.43
 -10  -7   3  517.04   33.03
  10   7   3  529.41   32.73
 -10  -7  -3  457.98   32.85
 -10   7   4  189.91   23.26
  10   7   4  236.81   22.53
 -10   7   4  257.41   20.49
 -10  -7  -4  235.63   16.31
 -10  -7   4  236.02   23.11
 -10  -7   4  226.88   24.55
  10  -7   4  250.33   25.45
  10  -7   5    0.11    8.67
 -10  -7   5    3.58   10.03
 -10  -7   5   -1.13    9.25
  10   7   5   -1.03    9.70
 -10   7   5   12.26    7.56
 -10   7   5   15.33   12.25
 -10   7   6  204.78   27.74
 -10   7   6  208.79   22.19
 -10  -7   6  220.50   26.65
  10   7   6  172.11   24.02
  10  -7   6  244.94   28.21
  10   7   7   13.59   11.60
 -10  -7   7   -4.11   11.94
 -10   7   7  -10.45    9.07
 -10   7   7   18.85   15.63
  10  -7   7   13.89   12.62
  10   7   8  260.93   33.16
 -10   7   8  212.04   34.01
  10  -7   8  231.08   33.06
 -10  -7   8  234.24   33.43
 -10   7   9   10.83   18.19
 -10  -7   9   23.50   18.71
  10   7   9   -3.23   15.02
  10  -7   9   19.29   17.07
 -10  -8   0 2501.35  109.70
 -10  -8   0 2566.42  105.38
 -10   8   0 2398.77  111.14
  10   8   0 2375.85  108.45
 -10   8   0 2527.05  112.41
 -10   8  -1  306.33   23.80
 -10   8   1  330.48   25.93
 -10  -8  -1  309.82   16.67
 -10  -8   1  309.98   23.92
 -10  -8  -1  319.98   24.77
 -10   8   1  279.32   22.10
  10   8  -1  303.74   22.55
 -10   8  -1  273.54   25.02
  10   8   1  241.76   20.57
 -10  -8   1  284.18   20.33
 -10   8   2  336.32   25.65
  10  -8   2  196.17   22.28
 -10  -8   2  273.64   23.82
  10   8   2  257.18   21.01
 -10   8  -2  235.07   23.49
 -10  -8  -2  285.01   25.28
 -10  -8  -2  289.48   14.17
 -10  -8   2  287.46   22.11
 -10  -8   2  289.71   23.38
  10  -8   2  283.67   25.32
 -10   8   2  254.80   20.67
 -10   8   3  327.21   28.82
  10  -8   3  282.62   27.65
 -10  -8   3  339.23   25.40
  10   8   3  346.84   25.58
 -10   8   3  292.29   22.14
  10  -8   3  298.75   27.52
 -10  -8   3  316.16   25.41
 -10  -8   3  318.93   25.23
 -10  -8  -3  341.79   27.39
 -10  -8   4   61.60   14.47
 -10   8   4   73.62   18.20
 -10  -8   4   84.14   16.59
  10   8   4   43.17   13.09
  10  -8   4   69.81   15.63
 -10   8   4   78.24   12.44
 -10   8   5   13.37    6.55
 -10  -8   5   21.58   12.80
  10  -8   5    6.63   11.65
 -10   8   5   11.19   13.63
  10   8   5   11.81   11.79
 -10  -8   5   10.13   10.35
  10  -8   6    7.73   11.76
 -10   8   6   17.03    9.87
  10   8   6   32.64   13.58
 -10  -8   6   13.37   12.68
 -10   8   6   46.59   17.69
  10   8   7    3.29   10.32
 -10   8   7    6.70   14.94
  10  -8   7    9.24   13.88
 -10  -8   7   17.02   14.98
 -10  -8   8   13.70   15.82
  10   8   8    2.60   13.53
 -10   8   8   25.53   16.26
  10  -8   8   -2.48   12.21
  10   8   9   -4.55   14.77
  10  -8   9   -1.37   17.46
 -10   8   9    7.17   18.26
 -10  -8   9   15.16   18.24
 -10  -9   0    3.96    7.17
 -10   9   0   -0.22    7.74
 -10   9   0   14.44    7.27
 -10  -9   0    8.76    4.94
  10   9   0    8.50    6.35
 -10  -9   1  251.51   23.21
 -10   9   1  205.57   23.27
 -10  -9   1  240.06   18.23
  10   9  -1  264.64   23.30
 -10   9  -1  260.71   23.15
  10   9   1  246.88   21.69
 -10  -9  -1  214.64   22.63
 -10   9  -1  235.11   24.25
 -10   9   1  248.88   20.28
 -10  -9  -1  251.19   14.16
 -10  -9   2  712.14   40.76
 -10  -9   2  825.38   45.36
 -10   9   2  751.85   41.14
 -10   9  -2  701.39   43.87
 -10  -9   2  765.94   42.57
 -10  -9   2  722.68   42.53
 -10   9   2  667.01   44.41
 -10  -9  -2  727.12   44.13
  10   9   2  755.29   42.47
  10   9   3  748.80   43.41
  10  -9   3  792.53   47.69
 -10   9   3  763.67   40.37
 -10   9   3  685.78   45.27
 -10  -9   3  696.41   43.76
 -10  -9   3  684.75   42.18
 -10  -9   3  711.71   42.13
  10  -9   3  709.39   44.43
 -10  -9  -3  689.65   43.67
  10  -9   4   87.53   18.60
 -10  -9   4   91.05   17.92
 -10  -9   4  104.86   19.03
  10   9   4   60.96   14.99
 -10   9   4  103.21   13.66
 -10   9   4   96.65   19.62
  10  -9   5  275.13   31.26
  10   9   5  323.84   30.22
 -10   9   5  303.89   32.76
 -10  -9   5  287.47   29.94
 -10  -9   6  613.38   44.44
  10   9   6  528.88   42.31
 -10   9   6  617.98   46.93
  10  -9   6  574.24   45.19
 -10  -9   7    0.89   13.15
 -10   9   7    9.70   15.28
  10   9   7   -2.92   11.55
  10  -9   7   -3.79   14.05
 -10  -9   8  301.74   39.13
 -10   9   8  389.47   43.03
  10  -9   8  278.41   37.80
  10   9   8  308.69   37.12
 -10  -9   9   54.35   23.37
  10  -9   9   65.22   25.24
  10   9   9   58.99   21.49
 -10   9   9   70.06   23.75
 -10  10   0  440.46   34.22
 -10  10   0  416.05   30.54
  10  10   0  455.60   31.54
 -10 -10   0  483.40   25.74
 -10 -10   0  571.93   34.82
 -10 -10   1  233.06   18.03
  10  10   1  217.43   21.72
  10  10  -1  202.72   21.85
 -10  10   1  218.31   20.47
 -10  10   1  184.78   23.98
 -10  10  -1  262.80   23.51
 -10  10  -1  232.00   25.68
 -10 -10   1  213.24   22.39
 -10 -10  -1  199.79   23.20
  10  10   2  262.15   24.14
 -10  10  -2  282.27   25.39
 -10 -10   2  249.88   23.85
 -10 -10   2  254.84   20.95
 -10  10   2  247.00   20.25
 -10  10  -2  224.46   25.98
  10  10  -2  196.29   22.68
 -10 -10  -2  228.72   25.07
 -10  10   2  239.47   26.63
 -10  10  -3  205.18   24.21
  10 -10   3  264.50   28.00
 -10 -10   3  272.89   24.76
 -10  10   3  240.33   27.56
 -10 -10  -3  220.96   25.16
  10  10   3  241.35   24.74
 -10 -10   3  182.19   23.61
 -10 -10   3  195.92   23.25
 -10  10   3  249.45   19.73
  10 -10   3  234.59   27.62
 -10 -10   4  398.11   32.77
  10 -10   4  346.14   33.94
  10  10   4  327.37   30.16
 -10 -10   4  306.64   30.78
  10 -10   4  338.48   32.83
 -10 -10  -4  290.12   30.99
 -10  10   4  342.68   34.39
  10  10   5   69.91   17.50
  10 -10   5   47.78   16.70
 -10 -10   5   80.54   18.60
 -10  10   5   79.23   20.57
 -10  10   6   19.75   16.57
  10  10   6   22.41   14.40
  10 -10   6   43.65   17.75
 -10 -10   6   21.18   14.84
 -10  10   7   36.58   19.89
  10  10   7   21.26   14.87
 -10 -10   7    5.29   14.80
  10 -10   7   12.42   14.27
 -10  10   8   31.26   19.17
 -10 -10   8    7.15   18.11
  10 -10   8    0.74   15.87
  10  10   8   13.92   16.51
 -10 -11   0   -3.31    8.04
  10  11   0    1.12    7.52
 -10  11   0   -0.47    6.98
 -10  11   0    9.19   11.07
 -10 -11  -1  513.81   36.12
 -10  11   1  527.25   32.64
 -10 -11   1  527.90   35.56
  10  11   1  438.20   33.50
 -10  11  -1  537.10   35.34
 -10  11   1  492.70   37.75
  10  11  -1  467.73   34.86
 -10  11  -1  494.87   37.94
 -10  11   2  796.74   52.98
  10  11   2  868.97   51.05
 -10  11  -2  990.25   56.78
  10  11  -2  873.29   52.44
 -10 -11  -2  823.54   51.06
 -10  11   2  914.15   47.62
  10 -11   3  417.71   36.36
 -10  11  -3  387.14   32.15
 -10 -11   3  431.96   33.13
 -10 -11   3  433.17   33.90
 -10  11   3  384.55   36.34
 -10 -11  -3  346.51   33.13
  10 -11   3  373.50   36.16
  10  11   3  395.52   32.08
 -10 -11   3  398.71   30.58
  10  11   4   99.72   19.65
 -10 -11   4  109.55   20.73
  10 -11   4   74.73   19.83
 -10 -11  -4   94.83   19.76
  10 -11   4  114.38   21.86
 -10 -11   4   83.24   19.38
 -10  11   4  114.66   23.46
  10  11   5   11.12   12.85
 -10  11   5   -1.95   12.73
  10 -11   5   19.30   13.69
  10 -11   5   13.69   12.35
 -10 -11   5    6.42   12.99
 -10  11   6  207.82   32.47
 -10 -11   6  181.59   28.69
  10 -11   6  175.83   29.08
  10  11   6  123.67   24.79
  10 -11   7    1.86   14.06
  10  11   7   22.40   16.44
 -10 -11   7   23.71   17.45
 -10  11   7   26.97   18.63
  10 -11   8  128.19   28.61
  10  11   8  247.06   35.79
 -10  11   8  145.08   30.26
 -10 -11   8   98.52   27.05
 -10  12   0 1223.86   64.24
 -10  12   0 1182.43   68.58
 -10 -12   0 1285.41   66.58
  10  12   0 1186.56   65.76
 -10  12   1  236.85   21.71
 -10 -12  -1  192.10   24.26
  10  12   1  242.17   25.79
  10  12  -1  213.35   25.26
 -10  12  -1  188.11   26.83
 -10  12  -1  199.37   22.38
 -10  12   1  209.83   27.63
 -10 -12   1  190.28   23.76
  10  12   2  250.69   27.99
 -10 -12  -2  257.57   28.43
 -10  12  -2  381.68   35.55
 -10  12   2  301.73   32.81
 -10  12  -2  307.66   29.21
  10  12  -2  340.77   31.54
 -10  12  -3   80.05   17.05
 -10 -12   3   59.28   15.53
  10  12   3   62.13   16.40
 -10  12  -3   78.61   20.00
 -10 -12  -3   60.81   17.18
 -10  12   3   53.26   17.77
  10  12   4   55.52   16.46
  10 -12   4   62.87   17.94
 -10 -12   4   57.55   17.17
 -10  12   4   58.02   19.43
 -10 -12  -4   33.44   14.15
  10 -12   4   27.41   14.64
 -10 -12   4   72.29   18.85
  10 -12   5    3.30   12.58
 -10 -12  -5   -6.00    9.31
 -10  12   5   -2.48   14.96
 -10 -12   5    6.91   13.90
  10 -12   5   -1.20   10.84
 -10 -12   5   -1.01   12.19
  10  12   5   12.97   13.27
  10 -12   6    1.33   13.10
 -10  12   6   21.33   19.20
 -10 -12   6   18.03   15.61
  10 -12   6    4.39   14.34
  10  12   6   15.77   14.66
  10 -12   7   -6.73   15.26
 -10  12   7   14.84   17.56
  10  12   7   -3.54   13.71
 -10 -12   7  -12.34   17.35
  10 -12   8  -21.14   16.60
 -10  12   8   13.95   20.72
  10  12   8   35.95   18.60
 -10 -12   8    8.05   19.39
  10  13   0   14.02   11.21
 -10 -13   0   32.56   13.58
 -10  13   0   25.17   10.44
 -10  13   0    7.88   11.83
 -10 -13   1  355.81   31.17
  10  13   1  324.00   31.22
  10  13  -1  341.08   32.86
 -10  13  -1  385.41   37.06
 -10 -13  -1  358.04   32.32
 -10  13   1  257.98   32.32
 -10  13  -1  263.11   27.37
 -10 -13  -2  910.39   53.65
 -10  13  -2  789.99   54.60
 -10  13   2  751.58   54.10
  10  13  -2  856.95   53.43
 -10 -13   2  789.08   49.73
 -10  13  -2  804.24   50.90
  10  13   2  822.90   52.30
  10  13  -3  261.68   30.47
 -10  13  -3  327.89   35.06
 -10  13   3  214.52   30.53
 -10 -13  -3  202.98   27.78
  10  13   3  203.45   27.23
 -10  13  -3  256.25   28.53
 -10 -13   3  222.18   25.61
 -10  13   4   36.56   17.72
  10 -13   4   50.62   18.02
 -10  13  -4   27.91   14.09
 -10 -13  -4   75.98   19.14
 -10 -13   4   40.74   16.57
  10 -13   4   18.00   14.52
 -10 -13   4   45.70   17.19
  10  13   4   55.94   16.94
 -10 -13  -5   65.10   18.57
 -10 -13   5  138.00   25.82
  10  13   5   69.63   20.07
 -10  13   5  120.38   27.45
  10 -13   5   83.99   21.95
 -10 -13   5  107.96   24.36
  10 -13   5   86.18   22.93
 -10 -13   6  198.85   30.79
 -10 -13  -6  157.54   27.17
 -10  13   6  210.44   34.83
 -10 -13   6  161.60   31.14
  10 -13   6  216.30   33.15
  10  13   6  190.59   30.32
  10 -13   6  150.51   30.05
 -10 -13   7   77.08   24.44
  10 -13   7   22.34   20.10
 -10  13   7   32.17   22.67
 -10 -13   7   73.61   22.95
  10 -13   7   54.80   22.45
  10  13   7   39.49   18.09
  10  14   0  296.40   31.78
 -10 -14   0  343.12   33.06
 -10  14   0  354.60   37.18
 -10 -14   1    5.14    9.49
  10  14  -1   47.92   16.17
  10  14   1   55.62   16.20
 -10  14  -1   45.92   14.95
 -10 -14  -1   71.09   17.88
 -10  14  -1   51.95   18.40
 -10  14   1   50.17   17.77
 -10  14  -2  293.85   35.97
  10  14  -2  330.10   34.53
 -10 -14  -2  299.23   32.63
  10  14   2  299.22   32.58
 -10 -14   2  349.55   32.09
 -10  14   2  341.75   37.31
 -10  14  -2  321.38   31.07
  10  14  -3  325.21   35.21
 -10 -14  -3  288.50   32.75
 -10  14   3  304.64   36.54
 -10  14  -3  319.52   32.39
 -10  14  -3  364.01   38.52
  10  14   3  281.37   32.22
  10  14   4  406.47   38.95
 -10  14  -4  343.31   39.29
 -10  14   4  349.87   40.18
 -10  14  -4  348.05   35.50
 -10 -14  -4  314.31   35.60
  10  14   5   19.76   14.73
  10 -14   5   -9.89   13.65
 -10 -14   5   13.51   17.32
 -10 -14   5   32.00   18.36
 -10  14   5   23.88   19.26
 -10 -14  -5   11.82   14.33
  10 -14   5   20.90   15.55
 -10  14   6   27.73   20.17
 -10 -14   6   57.95   21.71
 -10 -14   6    8.92   18.32
 -10 -14  -6    2.08   14.27
  10 -14   6   31.34   18.43
  10  14   6   -4.74   15.01
  10 -14   6   20.62   17.26
 -10 -14   7   36.71   20.45
 -10 -14   7    7.79   17.79
 -10 -14  -7   17.43   17.63
  10  14   7   30.02   20.01
  10 -14   7   25.01   20.38
 -10  14   7   -1.79   19.96
  10 -14   7   30.43   19.72
 -10  15   0   -8.12   13.44
 -10 -15   0   18.33   12.78
  10  15   0    5.23   13.12
  10  15  -1  330.00   34.51
 -10  15  -1  266.08   35.51
 -10  15   1  267.36   35.51
  10  15   1  240.30   30.80
 -10 -15  -1  285.22   32.43
 -10 -15  -2  458.29   40.81
  10  15  -2  403.98   40.73
  10  15   2  408.05   39.13
 -10 -15   2  561.27   39.28
 -10  15  -2  435.78   36.65
 -10  15   2  425.70   43.37
 -10  15  -2  423.67   43.86
 -10  15  -3  429.48   43.33
 -10  15   3  415.83   42.76
 -10 -15  -3  322.20   35.89
  10  15   3  373.34   37.31
 -10  15  -3  303.71   33.96
  10  15  -3  382.52   38.97
 -10 -15  -4    0.72   11.94
 -10  15   4   12.75   15.79
 -10  15  -4   38.04   18.19
 -10  15  -4    1.30   13.10
  10  15  -4   16.36   13.82
  10  15   4   17.02   15.17
 -10 -15   5   47.57   18.32
  10  15   5   72.17   20.36
 -10 -15  -5   44.65   17.89
 -10  15   5   49.33   20.80
 -10 -15   5   40.87   20.11
 -10  15  -5   52.57   18.41
  10  15   6  140.40   29.17
 -10 -15   6  107.61   25.82
 -10 -15  -6   57.56   19.82
 -10 -15   6  101.27   27.09
  10 -15   6  104.12   26.71
 -10  15   6  107.21   29.58
  10 -15   6  107.01   28.02
 -10 -16   0 1000.91   60.90
 -10  16   0  922.97   64.53
  10  16   0  924.17   62.57
 -10 -16  -1  163.71   27.36
  10  16  -1  210.24   30.50
 -10  16   1  174.23   31.22
 -10 -16   1  192.34   27.41
 -10  16  -1  181.90   31.41
  10  16   1  168.28   27.98
 -10  16   2  151.99   29.52
 -10  16  -2  138.77   28.48
  10  16   2  148.95   26.44
  10  16  -2  182.40   29.88
 -10 -16  -2  175.30   27.92
  10  16  -3  101.02   23.06
 -10 -16  -3   99.67   23.24
 -10  16   3   91.42   24.88
 -10  16  -3   77.68   23.18
  10  16   3   80.76   20.89
 -10  16  -3  113.10   23.87
 -10  16  -4   17.02   15.54
 -10  16   4   48.29   20.65
  10  16   4   43.96   18.68
 -10 -16  -4   59.24   19.59
  10  16  -4   39.36   17.88
 -10  16  -4   65.09   21.75
 -10 -16  -5  -21.51   12.98
  10  16  -5    3.78   12.76
 -10  16  -5    9.85   17.94
 -10  16  -5   24.58   15.87
  10  16   5   17.37   16.16
 -10  16   5   17.65   19.37
 -10  17   0  -15.95   16.20
 -10 -17   0   10.22   13.50
  10  17   0    3.09   15.18
  10  17   1  359.78   39.42
 -10 -17  -1  376.23   38.27
  10  17  -1  321.39   38.12
 -10  17  -1  388.68   44.45
 -10  17   1  344.67   42.65
  10  17   2  374.99   40.78
 -10  17   2  389.52   45.10
  10  17  -2  371.32   41.40
 -10 -17  -2  415.08   40.66
 -10  17  -2  457.55   47.54
 -10  17   3  323.42   41.83
 -10  17  -3  341.37   41.89
 -10 -17  -3  219.88   33.04
  10  17  -3  247.30   35.44
  10  17   3  228.60   33.14
  10  17  -4   81.14   22.24
 -10 -17  -4    8.86   16.46
 -10  17  -4    9.30   18.97
  10  17   4   29.71   17.80
 -10  17   4   45.20   22.75
  10  17   5   17.22   18.15
  10  17  -5   47.37   18.80
 -10  17  -5   19.65   18.88
 -10  17   5   16.98   20.33
 -10  17  -5   23.80   19.64
 -10 -17  -5    9.37   15.73
 -10  18   0  273.11   39.80
  10  18   0  219.92   34.07
  10  18   1   55.53   20.52
  10  18  -1   19.56   16.96
 -10 -18  -1   55.80   20.56
 -10  18  -1   73.76   24.24
 -10  18   1   41.79   21.60
 -10  18  -2  146.82   31.03
 -10  18   2  134.82   31.64
  10  18   2   90.81   23.25
 -10 -18  -2  136.94   26.96
  10  18  -2  125.90   27.28
  10  18  -3   61.21   23.53
 -10  18   3   70.20   25.40
 -10 -18  -3  141.11   28.40
  10  18   3   92.06   24.30
 -10  18  -3  110.55   28.61
 -10 -18  -4   80.22   23.00
 -10  18  -4  152.40   31.54
  10  18  -4  171.23   31.93
 -10  18   4  118.09   28.92
  10  18   4   88.80   25.88
  10  19   0   12.82   16.41
 -10  19   0   14.43   18.95
 -10  19  -1  142.74   31.87
  10  19   1  155.56   30.15
 -10  19   1  131.62   30.65
  10  19  -1  164.82   30.07
 -10  19  -2  221.51   38.33
 -10  19   2  216.29   37.26
  10  19   2  230.25   35.14
  10  19  -2  175.30   33.91
 -10 -19  -2  220.19   33.72
 -11   0   0    0.50    5.92
 -11   0   0   -1.07    4.74
 -11   0  -1    4.27    4.92
 -11   0   1    4.78    3.47
 -11   0   1   -2.37    5.52
 -11   0  -1    3.28    5.96
  11   0   1    3.24    3.11
 -11   0  -2  540.08   32.14
 -11   0   2  575.96   28.90
  11   0   2  583.87   28.55
 -11   0  -2  616.02   30.14
 -11   0   2  597.82   33.97
 -11   0  -3 1933.37   88.67
 -11   0   3 1892.72   89.51
  11   0   3 1971.17   84.67
 -11   0  -3 1969.97   83.38
  11   0   4  901.71   46.32
 -11   0   4  908.54   50.07
 -11   0   4  887.07   46.72
 -11   0   5   41.92   11.48
 -11   0   5   33.91   11.85
  11   0   5   61.17   12.61
  11   0   6  401.63   30.52
 -11   0   6  412.96   31.58
 -11   0   6  313.29   31.91
 -11   0   7  995.47   58.76
  11   0   7  913.88   56.57
 -11   0   7  959.17   59.60
 -11   0   8  256.33   32.60
 -11   0   8  261.56   33.72
  11   0   8  335.21   34.05
 -11   0   9   16.86   16.31
  11   0   9   14.31   13.01
  11   0  10  166.45   32.66
 -11   0  10  194.95   33.61
 -11   1   0    1.26    3.37
 -11   1   0    4.72    4.80
 -11  -1   0   -2.30    5.59
 -11  -1   0    0.68    5.46
 -11   1   0    2.07    5.70
 -11   1  -1 2281.97   94.38
  11   1   1 2347.02   92.20
 -11  -1   1 2278.68  100.50
 -11  -1   1 2200.53   92.14
 -11  -1  -1 2296.35   99.85
 -11   1  -1 2303.24  100.89
 -11   1   1 2293.66   93.28
 -11  -1  -1 2309.95   96.14
  11  -1   1 2349.63   93.64
 -11  -1   1 2239.26   97.06
 -11   1   1 2250.90  100.85
 -11  -1   2    9.87    6.51
 -11   1  -2   19.70    5.73
 -11  -1  -2   33.88    8.44
  11  -1   2   14.63    5.22
 -11   1  -2   16.89    7.76
  11   1   2   14.92    5.00
 -11   1   2   12.59    5.68
 -11  -1  -2    9.76    5.70
 -11  -1   2   11.24    5.23
 -11   1   2   17.10    6.83
 -11  -1  -3   28.30    7.65
 -11  -1   3    5.21    3.60
 -11  -1  -3   28.39    8.64
 -11   1  -3   35.48    6.89
 -11   1   3   36.77    9.90
 -11   1  -3   31.10    9.61
  11  -1   3   19.34    6.78
  11   1   3   23.48    7.11
 -11  -1   3    6.93    7.67
 -11  -1   4  722.98   42.52
 -11   1   4  703.91   39.26
  11  -1   4  692.11   39.05
  11   1   4  737.27   39.12
 -11  -1   4  713.04   39.14
 -11   1   4  711.51   42.17
  11   1   5  850.90   45.78
 -11   1   5  829.49   46.51
 -11  -1   5  826.57   46.36
  11  -1   5  802.30   45.65
 -11  -1   5  826.79   49.53
 -11   1   5  768.21   47.43
 -11   1   6  337.48   30.81
 -11  -1   6  342.18   29.48
 -11  -1   6  288.35   30.50
  11   1   6  307.38   28.09
  11  -1   6  284.64   27.68
 -11   1   6  355.82   29.09
 -11  -1   7  337.75   34.14
 -11   1   7  344.38   32.45
  11   1   7  324.14   30.98
 -11  -1   7  285.37   30.49
  11  -1   7  288.46   30.06
 -11   1   7  232.75   29.17
 -11   1   8   73.42   20.96
  11   1   8   83.26   19.69
 -11  -1   8   45.13   17.49
 -11   1   8   67.92   18.38
 -11  -1   8   49.14   18.60
  11  -1   8   73.99   19.34
  11  -1   9  606.49   46.69
  11   1   9  500.48   46.69
 -11  -1   9  580.06   49.81
 -11   1   9  550.22   49.12
 -11   1  10   60.52   22.25
 -11  -1  10   66.32   22.57
  11   1  10   78.24   24.03
  11  -1  10   61.87   22.83
 -11   2   0    7.65    4.50
 -11   2   0    1.16    5.95
 -11  -2   0    1.81    5.67
 -11  -2   0    1.98    5.45
  11  -2   1  273.53   15.67
  11  -2   1  283.60   16.51
 -11   2   1  278.16   16.05
  11   2   1  273.30   14.18
 -11   2  -1  254.42   16.05
 -11   2   1  326.65   21.61
 -11  -2   1  255.15   14.50
 -11   2  -1  236.38   19.66
 -11  -2   1  275.91   19.72
 -11  -2   1  307.10   20.59
 -11  -2  -1  254.19   18.06
 -11  -2  -1  254.01   18.57
 -11   2  -2   52.23   10.78
 -11  -2  -2   28.49    7.50
  11   2   2   36.68    6.53
 -11  -2   2   25.20    5.98
 -11  -2   2   32.96    8.82
 -11   2   2   43.10    7.68
 -11   2  -2   37.47    6.17
  11  -2   2   30.71    7.18
 -11   2   2   27.23    8.65
  11   2   3  824.73   41.21
 -11  -2   3  907.73   47.14
 -11   2   3  823.98   45.20
 -11  -2  -3  920.17   43.66
  11  -2   3  789.55   41.82
 -11   2   3  784.68   41.98
 -11   2  -3  874.41   39.00
  11  -2   4  674.47   36.01
  11   2   4  567.84   34.03
 -11  -2   4  573.26   34.50
 -11  -2   4  589.02   37.93
 -11   2  -4  642.39   31.29
 -11   2   4  592.95   36.82
 -11   2   4  585.37   35.38
 -11  -2   5   22.06   10.19
 -11  -2   5   10.08    9.05
 -11   2   5   28.79   10.83
 -11   2   5   14.27    9.05
  11   2   5   16.01    8.90
  11  -2   5   24.32    9.49
  11  -2   6  841.54   50.26
  11   2   6  857.12   49.67
 -11  -2   6  905.15   51.67
 -11   2   6  799.23   51.11
 -11   2   6  891.62   51.94
 -11  -2   6  829.56   53.66
 -11  -2   7  905.69   57.73
 -11  -2   7  845.22   53.67
  11  -2   7  793.49   52.38
 -11   2   7  849.90   54.71
 -11   2   7  906.94   55.31
  11   2   7  865.96   53.00
  11  -2   8  410.25   37.65
  11   2   8  294.44   33.64
 -11  -2   8  409.32   41.31
 -11   2   8  309.88   34.76
 -11   2   8  354.87   36.42
 -11  -2   8  411.18   38.50
  11  -2   9   -6.23   12.28
  11   2   9   11.81   15.57
 -11  -2   9   16.51   15.87
 -11   2   9   -5.69   15.09
 -11   2  10  146.88   29.63
  11  -2  10  118.01   27.87
 -11  -2  10  122.24   27.70
  11   2  10  103.01   25.64
 -11  -3   0   -4.04    3.85
  11   3   0    1.60    3.17
 -11   3   0   -0.70    5.18
 -11   3   0    0.82    6.08
 -11  -3   0   -2.22    5.30
 -11   3   1  383.82   25.55
  11  -3   1  394.71   21.34
 -11   3  -1  374.28   19.55
  11  -3   1  367.10   21.88
 -11  -3   1  408.76   20.47
  11   3   1  398.08   19.51
 -11   3  -1  417.53   26.14
 -11  -3  -1  430.42   23.59
 -11  -3   1  387.95   24.73
 -11  -3   1  390.92   24.45
 -11  -3  -1  364.57   23.97
 -11   3   1  337.69   21.24
 -11  -3   2   12.07    5.53
 -11  -3  -2    7.81    5.66
 -11   3   2    6.13    6.38
 -11  -3  -2    1.00    4.58
 -11  -3   2   17.22    7.19
 -11  -3   2   14.07    7.47
 -11   3  -2    1.76    3.53
  11   3   2   10.77    5.25
 -11   3  -2    4.10    6.17
 -11   3   2   -0.05    2.31
  11  -3   2   -7.63    4.05
  11  -3   3   30.76    8.28
 -11  -3  -3   31.67    8.70
 -11   3   3   31.56    9.12
  11   3   3   20.74    6.80
 -11   3   3   36.96    9.37
 -11   3  -3   38.74    5.80
 -11  -3   3   31.22    9.63
 -11  -3  -3   30.78    8.03
 -11  -3   4  228.84   23.35
 -11  -3   4  219.58   20.04
 -11   3   4  250.39   21.59
 -11   3  -4  232.21   14.92
  11  -3   4  226.16   20.60
 -11   3   4  237.61   21.62
 -11  -3  -4  273.19   19.83
  11   3   4  211.24   19.22
 -11   3   5 1279.06   64.22
 -11   3   5 1156.60   63.50
 -11  -3   5 1251.38   63.52
  11   3   5 1262.23   62.57
  11  -3   5 1167.40   62.91
 -11  -3   5 1258.13   67.47
 -11  -3   6  361.26   33.57
 -11   3   6  367.51   30.17
 -11  -3   6  325.87   30.22
  11  -3   6  327.27   30.42
 -11   3   6  299.99   29.45
  11   3   6  419.80   30.41
 -11   3   7  211.28   26.58
 -11  -3   7  236.62   28.67
  11  -3   7  207.55   26.83
  11   3   7  197.97   25.70
 -11  -3   7  235.59   30.41
 -11   3   7  266.24   30.29
 -11   3   8  232.74   32.39
  11   3   8  264.94   31.06
  11  -3   8  237.35   31.04
 -11  -3   8  262.64   31.80
 -11   3   8  235.98   29.89
 -11  -3   9  538.87   47.74
 -11   3   9  473.91   46.77
  11  -3   9  428.58   44.27
  11   3   9  576.20   45.30
 -11   4   0    8.34    6.98
 -11  -4   0    9.96    4.99
 -11  -4   0   -9.45    5.11
  11   4   0    6.84    4.11
 -11   4   0    0.02    4.97
  11  -4   1  138.01   13.38
 -11  -4   1  149.42   11.70
 -11  -4   1  118.62   14.78
 -11   4  -1  159.89   16.21
 -11  -4   1  142.82   11.30
 -11  -4   1  159.54   14.48
 -11  -4  -1  124.52   14.18
  11  -4   1  134.81   13.06
 -11  -4  -1  124.63   12.07
 -11   4   1  140.37   15.58
  11   4   1  130.26   10.62
 -11  -4  -2  163.09   13.54
 -11  -4   2  150.67   16.72
 -11   4  -2  197.93   19.12
  11  -4   2  147.94   14.79
 -11   4   2  156.01   16.51
 -11  -4  -2  143.29   15.67
 -11  -4   2  172.91   14.01
 -11  -4   2  194.35   17.49
  11   4   2  160.26   13.90
 -11   4   2  151.28   16.19
 -11   4  -2  157.88    9.52
  11   4   3 1341.91   62.40
 -11  -4  -3 1383.71   65.24
 -11   4   3 1284.24   65.44
 -11  -4  -3 1320.22   62.02
  11  -4   3 1438.09   64.91
 -11   4  -3 1368.95   56.07
 -11   4   3 1370.91   64.72
 -11  -4   3 1330.64   67.10
 -11  -4   4  631.65   36.49
 -11  -4  -4  578.62   33.85
 -11   4   4  646.78   37.89
 -11  -4   4  608.24   39.77
  11  -4   4  628.48   37.24
  11   4   4  585.63   35.07
 -11   4  -4  655.32   29.34
 -11   4   4  608.10   37.31
 -11  -4   5  111.13   19.54
  11  -4   5   85.59   16.27
  11   4   5   84.48   15.11
 -11   4   5   66.63   14.66
 -11  -4   5   95.81   16.27
 -11   4   5  111.25   16.28
 -11   4   6  563.45   39.84
 -11  -4   6  537.73   41.17
 -11  -4   6  616.78   40.28
  11  -4   6  625.24   40.96
 -11   4   6  546.82   38.71
  11   4   6  530.24   38.08
 -11   4   7  611.63   43.99
 -11   4   7  672.16   46.85
  11   4   7  671.66   45.29
  11  -4   7  624.55   45.86
 -11  -4   7  752.84   51.35
 -11  -4   7  620.20   45.26
  11   4   8   82.34   19.18
 -11   4   8  101.48   20.51
 -11  -4   8   64.46   20.20
  11  -4   8   97.69   21.54
 -11   4   8   75.07   20.73
  11   4   9  -10.89   11.10
 -11  -4   9   15.03   16.87
 -11   4   9   39.73   18.19
  11  -4   9    6.01   14.13
 -11  -5   0   -0.50    5.88
 -11  -5   0   -1.36    4.40
 -11   5   0    2.49    4.04
  11   5   0    0.66    4.25
 -11   5   0    3.69    6.35
 -11   5   1  528.19   30.89
 -11   5   1  551.69   32.66
 -11  -5   1  584.81   29.20
 -11   5  -1  573.78   33.73
 -11  -5   1  409.22   28.32
 -11  -5  -1  548.09   28.22
 -11  -5  -1  597.55   32.93
 -11  -5   1  535.32   27.73
 -11  -5   1  534.16   32.10
  11   5   1  554.43   28.26
 -11   5   2   83.76   12.95
 -11  -5  -2   64.85   12.11
  11   5   2   85.38   10.58
 -11  -5  -2   85.58    9.57
  11  -5   2  111.21   13.75
 -11   5   2   76.10   12.15
 -11   5  -2   73.68   13.44
 -11  -5   2   64.73   11.68
 -11  -5   2   82.42   13.29
 -11  -5   2   89.95   11.34
 -11  -5   3  197.44   20.57
 -11  -5  -3  232.19   16.04
  11   5   3  197.66   17.66
  11  -5   3  218.38   20.41
 -11   5   3  199.58   19.34
 -11  -5  -3  196.98   20.30
 -11   5   3  217.39   19.61
 -11   5  -4  247.46   13.43
 -11  -5  -4  258.31   18.51
 -11  -5   4  176.05   22.34
 -11   5   4  268.15   21.42
 -11  -5   4  243.52   21.80
  11  -5   4  265.80   23.49
 -11   5   4  255.38   23.49
  11   5   4  244.51   21.49
 -11  -5   5  762.38   45.09
 -11  -5   5  799.06   49.09
  11   5   5  770.02   44.75
 -11   5   5  778.32   46.48
 -11  -5  -5  730.33   40.60
  11  -5   5  708.16   44.92
 -11   5   5  751.87   44.48
 -11  -5   6  189.54   23.54
 -11   5   6  147.16   22.89
  11  -5   6  197.47   24.72
  11   5   6  168.70   22.13
 -11  -5   6  156.79   24.90
 -11   5   6  148.31   20.71
 -11   5   7   29.97   15.62
  11  -5   7   11.22   11.82
 -11  -5   7   -5.75   11.71
  11   5   7    5.25   11.34
 -11  -5   7   20.82   13.61
 -11   5   7   16.25   11.48
 -11  -5   8   46.55   17.32
 -11   5   8   48.73   16.39
  11   5   8   54.31   17.24
 -11   5   8   70.92   21.32
  11  -5   8   53.17   18.47
  11   5   9  301.45   37.63
 -11  -5   9  364.22   41.02
  11  -5   9  398.46   41.61
 -11   5   9  314.52   39.53
 -11  -6   0    6.50    7.09
 -11   6   0    6.66    7.24
 -11  -6   0   -3.03    4.52
  11   6   0    4.71    4.84
 -11   6   0    3.66    6.92
  11   6  -1  119.12   12.69
 -11   6   1  130.46   15.12
  11   6   1   93.21   11.15
 -11  -6   1   82.87   11.25
 -11  -6  -1  125.92   15.60
 -11   6  -1  115.99   14.74
 -11   6   1  105.09   14.32
 -11   6  -1   76.67   13.66
 -11  -6   1  126.19   15.62
 -11  -6  -1   98.49    9.97
 -11   6   2  101.64   14.72
  11  -6   2   89.41   13.88
  11  -6   2  140.68   15.61
 -11   6   2   99.20   14.27
 -11  -6  -2  130.81   10.82
 -11  -6  -2   95.09   14.90
 -11  -6   2  100.91   13.87
  11   6   2  102.84   12.54
 -11  -6   2  143.57   16.86
 -11   6  -2   99.41   15.37
 -11  -6   2  118.84   13.55
 -11   6   3  478.00   31.75
  11  -6   3  509.10   32.24
 -11  -6  -3  476.49   25.95
 -11  -6   3  442.25   31.28
  11   6   3  516.34   29.96
 -11   6   3  431.99   29.58
 -11  -6   3  490.24   29.79
 -11  -6  -3  508.09   32.46
 -11  -6   4  488.97   34.70
 -11   6   4  394.43   32.01
 -11  -6  -4  514.99   27.61
 -11  -6   4  482.44   31.77
 -11   6   4  433.22   30.09
  11  -6   4  503.02   33.36
  11   6   4  530.91   32.27
 -11   6   5   75.98   17.00
  11  -6   5   72.27   15.74
 -11  -6   5   78.39   16.19
 -11   6   5   83.70   14.35
 -11  -6  -5   74.70   11.26
 -11  -6   5   56.35   15.41
  11   6   5   79.55   15.25
  11   6   6  502.53   36.67
 -11   6   6  518.16   39.32
 -11  -6   6  491.47   39.47
 -11   6   6  436.93   33.73
 -11  -6   6  524.33   37.97
  11  -6   6  513.24   38.58
  11  -6   7  819.50   55.24
 -11   6   7  863.69   52.82
 -11   6   7  830.13   56.30
 -11  -6   7  993.44   57.99
  11   6   7  786.35   53.42
 -11   6   8  150.87   27.30
  11   6   8   87.60   21.09
 -11  -6   8  119.72   24.80
  11  -6   8  137.68   26.15
 -11   6   8  109.42   21.46
  11   6   9   -9.36   12.45
 -11   6   9   23.91   18.62
 -11  -6   9    4.68   16.98
  11  -6   9   17.18   15.98
  11   7   0    0.89    4.85
 -11  -7   0   11.11    5.41
 -11   7   0   -1.05    6.18
 -11  -7   0    5.16    7.14
 -11   7   0   -3.13    7.24
 -11   7  -1  271.28   22.91
 -11   7   1  278.21   22.40
 -11  -7  -1  281.29   22.99
  11   7  -1  260.02   20.15
 -11   7   1  282.86   22.81
 -11  -7   1  293.83   20.22
 -11  -7   1  267.83   22.10
  11   7   1  274.91   20.02
 -11   7  -1  274.93   22.81
 -11  -7  -1  286.99   17.03
 -11  -7  -2    4.39    6.49
 -11  -7   2   -0.66    3.39
 -11   7   2    7.60    7.68
  11  -7   2   -2.67    6.43
 -11  -7   2   -2.53    6.14
 -11  -7  -2   -1.82    4.12
 -11  -7   2   -2.05    3.31
 -11  -7   2    5.25    6.25
 -11   7  -2    2.10    6.48
 -11   7   2    1.66    6.22
  11  -7   2   11.76    7.88
  11   7   2    5.58    6.12
 -11  -7   3   36.61   10.33
 -11  -7  -3   24.96    6.04
 -11  -7  -3   30.60   10.00
  11  -7   3   29.05    9.61
 -11  -7   3   14.14    9.32
 -11  -7   3   22.55    8.99
 -11   7   3   10.31    9.00
  11   7   3   19.31    8.00
 -11   7   3   23.19    7.69
 -11   7   4   83.09   13.26
  11  -7   4   80.72   16.67
 -11   7   4  100.14   18.01
 -11  -7  -4   81.71    9.73
  11   7   4   78.10   14.36
 -11  -7   4  122.68   17.69
 -11  -7   4   88.82   17.11
 -11   7   5  771.01   43.97
 -11  -7   5  759.06   49.44
 -11   7   5  713.80   48.37
  11  -7   5  730.31   47.34
  11   7   5  742.59   46.06
 -11  -7   5  812.63   47.83
  11  -7   6  271.33   30.25
 -11  -7   6  242.91   30.93
 -11   7   6  248.94   25.15
  11   7   6  302.07   29.35
 -11   7   6  336.36   33.87
 -11  -7   6  277.10   29.91
 -11   7   7  311.03   30.95
  11  -7   7  380.94   37.83
  11   7   7  431.43   37.64
 -11   7   7  421.63   39.81
 -11  -7   7  406.09   37.80
 -11  -7   8  144.86   27.81
 -11   7   8  185.08   31.57
  11   7   8  160.50   27.16
  11  -7   8  142.85   27.02
  11  -7   9  252.91   37.60
  11   7   9  302.83   38.06
 -11  -7   9  319.85   40.05
 -11   7   9  327.94   42.93
 -11  -8   0    1.05    6.83
 -11   8   0    5.66    7.57
  11   8   0    3.63    5.65
 -11  -8   0   -6.37    4.46
 -11   8   0    7.31    6.92
 -11  -8   1  197.64   16.12
 -11  -8  -1  167.44   11.87
 -11  -8  -1  182.17   20.22
 -11   8   1  150.76   19.29
 -11   8  -1  111.25   16.81
  11   8   1  192.03   17.61
 -11   8  -1  178.15   20.18
  11   8  -1  136.06   16.22
 -11  -8   1  169.23   19.22
 -11   8   1  159.69   17.83
 -11  -8   2    9.40    7.35
 -11  -8   2   -2.47    6.58
  11  -8   2    4.73    6.87
 -11   8  -2    9.89    7.21
 -11  -8  -2    7.30    7.38
 -11  -8   2    5.49    6.41
 -11  -8  -2    6.86    3.30
 -11   8   2   14.39    8.98
 -11   8   2   12.64    6.99
 -11  -8   2   -0.06    3.58
  11   8   2   -2.08    6.01
  11  -8   2   -3.79    6.32
 -11  -8   3  721.61   42.51
 -11   8  -3  748.24   45.47
 -11   8   3  711.40   44.22
 -11  -8   3  659.19   41.54
 -11  -8  -3  713.78   43.81
 -11  -8   3  632.19   41.18
 -11   8   3  728.92   40.42
  11  -8   3  783.25   45.73
  11   8   3  782.27   41.92
  11  -8   3  633.26   41.36
 -11   8   4  296.78   30.52
 -11  -8   4  293.76   27.28
  11  -8   4  288.40   28.86
 -11   8   4  322.52   23.81
  11   8   4  341.48   26.94
 -11  -8   4  320.81   29.39
  11   8   5    7.68    9.56
 -11  -8   5    6.83   11.47
 -11  -8   5   10.90   10.13
 -11   8   5    5.99    6.76
  11  -8   5    6.21   10.74
 -11   8   5    5.09   11.76
 -11   8   6  565.24   37.25
  11  -8   6  548.79   42.50
 -11   8   6  513.87   42.65
 -11  -8   6  627.48   42.56
  11   8   6  476.16   38.66
  11  -8   7  611.85   48.05
 -11   8   7  666.05   50.13
 -11  -8   7  657.56   48.26
  11   8   7  673.78   48.66
  11  -8   8  154.36   30.06
 -11  -8   8  167.63   29.49
 -11   8   8  149.87   28.72
  11   8   8  149.55   26.81
 -11  -8   9   -5.95   17.44
  11  -8   9  -11.96   15.40
 -11   8   9   13.26   18.62
  11   8   9  -11.84   13.05
  11   9   0   10.16    7.03
 -11   9   0    2.08    7.29
 -11  -9   0    9.70    4.88
 -11  -9   0    0.90    6.95
 -11   9   0   -0.80    7.82
 -11  -9  -1  671.77   31.64
 -11  -9  -1  635.64   40.24
 -11  -9   1  667.21   36.41
 -11  -9   1  681.42   40.96
  11   9   1  654.29   38.46
 -11   9  -1  657.69   40.54
 -11   9   1  653.95   41.60
 -11   9  -1  645.56   41.51
 -11   9   1  689.31   39.64
  11   9  -1  691.40   39.47
 -11   9   2   41.52   10.31
 -11   9   2   23.72   11.86
 -11  -9   2   42.53    9.97
 -11  -9  -2   24.94   10.51
 -11  -9   2   18.21    8.87
 -11  -9   2   22.09   10.58
 -11  -9   2   18.23    9.43
 -11   9  -2   38.69   11.58
  11   9   2   20.44    9.13
 -11  -9   3  129.35   18.02
  11  -9   3  100.12   17.94
  11   9   3  136.49   18.10
 -11   9   3  128.70   15.37
 -11   9  -3   88.38   17.29
 -11  -9   3  141.92   18.87
 -11  -9   3  104.29   16.63
 -11  -9  -3  125.91   19.63
 -11   9   3  155.35   21.63
 -11  -9   3   97.51   17.23
  11  -9   3   99.13   18.58
  11   9   4  205.19   22.83
  11  -9   4  181.79   24.76
 -11   9   4  186.91   25.26
 -11  -9   4  173.87   22.61
 -11  -9  -4  139.66   22.23
 -11  -9   4  196.33   23.31
 -11   9   4  184.72   18.07
  11  -9   4  129.22   22.21
 -11   9   5  514.81   42.16
 -11   9   5  504.30   32.66
  11   9   5  542.08   38.39
  11  -9   5  492.56   39.40
 -11  -9   5  543.02   39.30
 -11  -9   6  165.28   26.56
  11  -9   6  139.04   25.31
 -11   9   6  230.27   30.78
  11   9   6  180.68   26.32
 -11  -9   7  109.40   23.51
  11   9   7   54.31   18.03
 -11   9   7   76.33   22.30
  11  -9   7   47.17   18.59
 -11  -9   8   29.41   19.35
 -11   9   8   41.24   19.95
  11   9   8   71.55   20.43
  11  -9   8   33.87   18.92
  11  10   0   -1.10    6.42
 -11  10   0   19.92   10.91
 -11 -10   0   -3.19    7.01
 -11  10   0   -2.39    5.95
 -11 -10   0    2.35    5.03
 -11 -10  -1   62.02   15.05
 -11  10  -1   45.20   12.16
  11  10  -1   54.26   12.68
 -11  10   1   48.19   11.47
 -11  10  -1   42.97   13.74
 -11 -10   1   48.26    9.94
 -11 -10   1   34.31   11.41
  11  10   1   64.82   12.90
 -11  10   1   64.61   15.99
  11  10  -2  224.91   23.18
 -11  10  -2  208.56   25.49
 -11 -10   2  192.32   19.40
 -11  10   2  237.21   20.99
 -11 -10  -2  239.88   25.56
 -11  10  -2  187.70   22.87
 -11 -10   2  214.37   23.16
  11  10   2  192.34   21.44
 -11  10   2  241.37   26.26
 -11 -10   3  744.05   47.73
  11 -10   3  708.73   47.45
  11 -10   3  857.59   51.96
 -11 -10   3  743.97   45.79
  11  10   3  795.83   47.06
 -11 -10  -3  753.14   48.46
 -11  10   3  813.05   43.58
 -11  10  -3  713.74   47.90
 -11  10   3  948.17   53.05
 -11 -10   3  802.42   47.22
  11 -10   4  454.46   36.72
 -11 -10  -4  423.27   34.55
  11 -10   4  398.02   36.00
 -11 -10   4  421.40   34.43
 -11 -10   4  442.54   33.55
 -11  10   4  396.94   37.07
  11  10   4  380.20   31.71
  11 -10   5   10.47   12.20
 -11 -10   5    1.63   10.88
  11  10   5  -14.39    8.32
 -11  10   5    5.11   13.73
  11 -10   6  216.60   30.99
 -11  10   6  243.48   32.83
  11  10   6  234.70   29.94
 -11 -10   6  147.20   26.36
  11 -10   7  305.53   38.33
 -11 -10   7  340.08   37.73
 -11  10   7  332.48   40.70
  11  10   7  325.30   35.90
  11 -10   8  153.07   30.88
 -11  10   8  185.36   32.89
 -11 -10   8  151.75   31.41
  11  10   8  155.80   28.70
 -11  11   0   16.78   10.91
 -11  11   0   12.41    8.53
  11  11   0    4.67    7.66
 -11 -11   0    9.63   10.31
 -11  11  -1  285.04   25.98
 -11  11   1  276.91   23.15
  11  11  -1  260.53   26.26
 -11 -11  -1  274.20   27.56
 -11  11  -1  301.25   30.47
 -11  11   1  269.29   29.14
 -11 -11   1  278.55   26.92
  11  11   1  244.17   25.18
 -11  11  -2   -7.83    8.66
 -11 -11  -2   -9.13    8.23
  11  11   2    3.50    8.95
  11  11  -2    5.52    9.61
 -11  11   2    1.17   12.05
 -11 -11   2   19.33   10.37
 -11  11  -2   -2.19   10.74
 -11  11   2   23.50    8.59
 -11 -11   3    4.48    9.46
 -11 -11  -3    8.71   10.04
 -11  11  -3   23.84   11.03
 -11 -11   3    1.80   10.77
 -11  11   3   10.91   13.40
  11  11   3   13.69   10.79
  11 -11   3    9.59   11.95
  11 -11   3   -5.71   10.15
 -11 -11   3    1.47   10.24
 -11  11   4  325.81   35.33
  11 -11   4  283.17   31.81
  11  11   4  271.80   29.11
 -11 -11   4  284.23   29.75
 -11 -11   4  215.73   27.68
 -11 -11  -4  266.39   29.68
  11 -11   4  269.75   32.43
 -11 -11  -5  544.47   41.01
  11 -11   5  437.63   42.07
  11  11   5  441.88   37.22
 -11  11   5  511.44   43.94
  11 -11   5  480.13   42.40
 -11 -11   5  489.88   39.85
 -11 -11   6  208.00   29.97
  11 -11   6  188.52   30.77
  11  11   6  141.92   26.00
 -11  11   6  177.29   30.74
  11 -11   7  205.30   32.77
  11  11   7  171.29   28.99
 -11  11   7  210.40   34.91
 -11 -11   7  195.90   31.81
  11  11   8  111.83   26.44
  11 -11   8   76.88   24.62
 -11 -11   8   56.27   22.77
 -11  11   8   72.76   23.48
 -11  12   0    3.55    7.66
 -11  12   0    0.20   11.53
 -11 -12   0   -7.93    8.97
  11  12   0   -9.03    8.81
 -11  12  -1  121.17   22.64
 -11 -12   1   93.00   18.83
  11  12  -1   96.59   19.05
 -11  12   1  133.49   18.15
  11  12   1  116.16   19.31
 -11  12   1  154.94   24.35
 -11  12  -1  108.42   18.01
 -11 -12  -1  133.90   20.82
 -11  12   2    3.78   12.25
 -11  12  -2    1.38   12.00
  11  12  -2    4.73    9.67
 -11 -12   2   -5.47    6.18
  11  12   2   13.43   10.87
 -11 -12  -2   30.07   13.41
 -11  12  -2    9.85   11.18
 -11  12  -3  232.04   29.86
 -11  12  -3  251.19   28.41
 -11 -12  -3  274.47   30.35
 -11 -12   3  209.11   25.32
  11  12   3  286.34   28.96
 -11  12   3  241.10   31.14
 -11 -12  -4  217.22   28.33
  11 -12   4  221.44   30.57
  11 -12   4  180.89   28.15
 -11 -12   4  203.83   27.59
 -11  12   4  181.53   28.93
  11  12   4  193.28   26.52
 -11  12  -4  172.38   26.06
 -11 -12   4  221.94   27.74
 -11 -12   5   12.81   13.66
 -11 -12  -5   -1.62   11.90
  11  12   5   -9.48   12.49
 -11 -12   5    6.65   13.18
  11 -12   5    5.86   12.35
  11 -12   5   -5.60   12.07
 -11  12   5    1.91   15.45
 -11  12   6  506.84   48.09
  11 -12   6  403.61   43.78
 -11 -12   6  493.30   44.70
 -11 -12  -6  373.95   40.17
  11 -12   6  472.85   44.55
  11  12   6  453.07   42.35
  11  12   7  568.90   50.79
 -11  12   7  591.24   55.40
  11 -12   7  475.74   50.29
 -11 -12   7  588.54   51.51
 -11  13   0    1.17   11.82
 -11  13   0    6.23    9.09
  11  13   0   -5.79   10.36
 -11 -13   0   12.91   11.72
  11  13   1  292.81   29.86
 -11 -13  -1  278.10   30.22
 -11  13  -1  276.87   32.64
 -11  13   1  257.34   31.83
 -11  13  -1  297.21   28.91
 -11 -13   1  275.63   29.16
  11  13  -1  322.73   31.36
 -11 -13   2   -7.40    6.09
  11  13   2   32.19   12.76
 -11  13  -2   36.64   13.01
 -11  13   2   24.67   15.12
 -11 -13  -2   24.83   13.96
 -11  13  -2   32.03   15.22
  11  13  -2   15.02   12.26
  11  13   3   31.45   13.37
 -11 -13   3   44.18   15.15
 -11 -13  -3   74.84   18.41
 -11  13   3   39.95   17.87
 -11  13  -3   52.82   15.81
 -11  13  -3   85.53   21.22
  11  13  -3   70.70   16.96
  11 -13   4  101.87   24.11
  11 -13   4  153.89   26.74
  11  13   4  164.12   25.19
 -11 -13   4  120.49   22.92
 -11 -13  -4  137.61   24.84
 -11  13   4  153.03   27.39
 -11 -13   4  161.00   26.43
 -11  13  -4  135.64   23.73
 -11 -13   5  386.80   40.03
 -11 -13  -5  371.13   38.29
  11  13   5  399.93   39.26
 -11 -13   5  386.69   39.03
  11 -13   5  413.84   43.05
 -11  13   5  459.43   45.23
  11 -13   5  334.47   39.06
 -11 -13   6  104.83   25.58
  11 -13   6  118.14   25.62
 -11 -13  -6   89.77   21.85
  11 -13   6  110.87   26.39
  11  13   6  112.25   24.77
 -11  13   6   98.25   27.54
 -11 -13   6   53.25   20.61
 -11 -13   7   86.35   23.72
  11 -13   7   70.20   24.73
  11 -13   7   65.85   23.83
 -11 -13   7  113.45   25.91
 -11  13   7  101.28   27.70
 -11 -13  -7   82.55   23.27
  11  13   7   81.74   24.71
  11  14   0  -17.85    9.24
 -11  14   0   15.62   13.71
 -11 -14   0  -13.89    9.93
  11  14   1    0.64   10.58
 -11 -14   1    0.00   12.79
  11  14  -1   34.56   14.27
 -11 -14  -1   23.93   13.95
 -11  14   1   14.39   15.17
 -11  14  -1    3.50   11.74
 -11  14  -1    7.25   14.81
  11  14   2  278.93   31.06
 -11  14   2  266.35   34.21
 -11  14  -2  233.50   33.13
 -11 -14   2  320.53   30.70
 -11  14  -2  287.91   29.49
 -11 -14  -2  215.19   29.40
  11  14  -2  262.31   31.48
  11  14   3  431.49   38.46
 -11  14  -3  371.79   40.44
 -11  14   3  442.79   42.59
  11  14  -3  413.50   39.13
 -11 -14   3  465.32   36.01
 -11  14  -3  360.49   35.91
 -11 -14  -3  418.41   39.24
 -11 -14  -4  198.12   30.31
 -11  14   4  253.73   35.27
  11  14   4  221.09   30.05
 -11  14  -4  258.97   34.53
 -11  14  -4  180.00   27.50
  11 -14   5   23.69   16.38
 -11 -14  -5   21.64   15.14
  11  14   5   36.24   16.88
  11 -14   5   13.72   15.68
 -11  14  -5   36.77   15.97
 -11 -14   5   18.71   17.36
 -11  14   5  -12.67   15.79
 -11 -14   5   15.34   15.96
  11 -14   6  125.66   28.79
 -11 -14   6  202.69   33.61
 -11  14   6  175.68   33.81
  11 -14   6  140.16   29.05
 -11 -14   6  113.07   27.26
 -11 -14  -6  130.67   25.89
  11  14   6  129.46   26.67
  11 -14   7  239.55   37.58
 -11 -14  -7  136.74   29.09
 -11  14   7  255.93   41.81
  11  14   7  201.62   35.08
 -11 -14   7  260.79   37.98
 -11 -14   7  257.63   37.06
  11 -14   7  232.81   38.81
 -11  15   0   -3.90   13.02
 -11 -15   0   -5.62   12.77
  11  15   0   -8.85   11.17
 -11 -15  -1  300.93   32.28
 -11  15  -1  185.27   30.41
  11  15  -1  194.19   28.13
 -11  15   1  213.42   32.00
 -11 -15   1  150.37   24.39
  11  15   1  179.83   27.32
  11  15   2   22.68   12.98
  11  15  -2    7.85   12.01
 -11  15  -2    6.91   11.32
 -11  15   2   34.62   17.77
 -11 -15   2   17.39   12.64
 -11  15  -2   38.54   17.76
 -11 -15  -2   23.15   15.22
 -11 -15  -3   44.50   17.22
 -11  15  -3   23.59   13.65
  11  15   3   38.91   15.96
 -11  15   3   11.92   15.58
  11  15  -3   23.29   14.49
 -11  15  -3   45.78   20.43
  11  15  -4   75.28   20.91
 -11  15  -4   82.36   20.42
 -11  15  -4  112.33   26.60
  11  15   4   57.64   19.05
 -11  15   4   87.49   24.40
 -11 -15  -4   89.93   22.36
  11  15   5  251.51   34.92
 -11 -15  -5  354.61   39.42
 -11  15   5  295.19   40.81
 -11  15  -5  286.85   35.53
 -11 -15   5  289.41   39.26
 -11 -15   5  381.98   40.44
  11 -15   6   55.17   22.75
 -11  15  -6   74.52   21.95
 -11 -15   6   85.28   23.95
 -11 -15   6   74.81   24.67
  11 -15   6   33.85   21.52
 -11 -15  -6   54.59   20.08
 -11  15   6   82.95   28.30
  11  15   6   42.64   19.78
 -11  16   0  -18.51   12.98
 -11 -16   0   -4.95   13.02
  11  16   0   19.41   14.41
  11  16   1   45.64   15.82
 -11  16   1   42.41   20.10
 -11 -16   1    7.25   10.38
 -11 -16  -1    2.58   13.43
 -11  16  -1    3.81   15.66
  11  16  -1   41.25   16.05
 -11 -16  -2    2.51   14.10
 -11  16  -2  -13.81   13.91
 -11  16   2    6.39   15.81
  11  16   2   31.90   15.33
  11  16  -2   11.98   15.27
 -11 -16  -3  230.03   32.27
 -11  16  -3  205.55   33.88
  11  16  -3  267.26   34.65
 -11  16  -3  292.24   33.19
  11  16   3  232.57   32.02
 -11  16   3  261.51   37.10
 -11  16  -4  164.63   32.03
 -11  16   4  197.72   34.23
 -11  16  -4  203.79   30.19
  11  16   4  166.04   29.92
  11  16  -4  150.58   28.41
 -11 -16  -4  159.20   28.36
 -11  16  -5   -0.60   13.71
  11  16   5   25.61   18.03
 -11 -16  -5  -18.48   13.59
 -11  16  -5  -13.06   15.07
  11  16  -5   13.33   15.28
 -11  16   5   18.36   23.18
 -11  17   0   11.98   18.77
 -11 -17   0    8.11   15.11
  11  17   0   -9.30   11.96
 -11 -17  -1   90.38   21.64
 -11  17  -1   88.49   24.44
 -11  17   1   77.95   24.46
  11  17   1   51.91   17.77
  11  17  -1   73.03   20.50
 -11  17   2   19.02   17.56
  11  17   2   14.37   16.11
 -11 -17  -2   -3.45   14.14
 -11  17  -2    2.62   15.97
  11  17  -2   12.87   15.53
 -11 -17  -3   12.96   16.52
  11  17  -3   29.59   17.15
  11  17   3   15.95   14.53
 -11  17   3   12.98   17.96
 -11  17  -3   30.41   18.18
 -11  17   4   81.41   26.42
  11  17   4   74.95   23.93
 -11  17  -4   99.77   26.42
 -11 -17  -4   93.59   24.21
  11  17  -4   62.91   21.52
 -11  18   0  -21.47   14.36
  11  18   0    5.92   13.85
  11  18   1   21.49   15.21
 -11 -18  -1   24.61   16.56
  11  18  -1   26.89   17.05
 -11  18  -1    0.03   17.11
 -11  18   1   10.92   18.69
 -11 -18  -2   56.34   20.51
 -11  18   2   42.34   22.71
  11  18   2   29.53   18.34
  11  18  -2   84.85   23.05
 -11  18  -2    8.25   20.51
 -11  18   3  252.10   39.79
  11  18  -3  257.01   36.76
 -11  18  -3  234.12   39.39
 -11 -18  -3  213.20   33.12
  11  18   3  289.32   37.62
  11  19   0   10.08   17.22
 -11  19   0   31.73   20.72
  11  19   1  107.49   26.80
 -11 -19  -1  159.67   29.52
 -11  19  -1  139.16   30.78
 -11  19   1  126.53   31.15
  11  19  -1  165.11   32.01
 -11  19   2   51.08   23.96
  11  19  -2   80.43   23.74
 -11  19  -2   74.27   24.65
  11  19   2   55.19   21.74
 -11 -19  -2   52.57   22.22
 -12   0   0   32.22    7.51
 -12   0   0   39.77    9.59
 -12   0   1 1048.21   43.66
 -12   0  -1  961.30   50.56
 -12   0  -1 1059.55   47.96
 -12   0   1 1069.27   51.75
  12   0   1 1011.75   43.41
 -12   0  -2   48.90    8.66
 -12   0   2   45.65   10.20
  12   0   2   63.17    7.63
 -12   0   2   60.15    7.85
 -12   0  -2   59.92   10.74
 -12   0  -3 1561.43   72.39
  12   0   3 1517.96   67.53
 -12   0  -3 1558.71   66.99
 -12   0   3 1457.64   72.50
 -12   0   3 1427.21   67.14
  12   0   4  961.65   48.45
 -12   0   4  948.16   52.62
 -12   0  -4  996.70   47.37
 -12   0   4  897.72   48.34
 -12   0   5  305.67   27.68
 -12   0   5  315.76   24.25
  12   0   5  241.07   23.14
 -12   0   6  465.34   37.18
  12   0   6  491.55   35.93
 -12   0   6  607.71   38.35
 -12   0   7   57.21   16.34
  12   0   7   27.12   12.53
 -12   0   7   35.98   15.23
 -12   0   8  113.19   22.97
 -12   0   8  105.85   22.68
  12   0   8  125.62   23.22
 -12   0   9  165.89   29.25
  12   0   9   96.25   22.39
  12   0  10  203.07   33.04
 -12   0  10  208.91   34.96
 -12  -1   0 3501.40  146.95
 -12  -1   0 3659.83  152.71
 -12   1   0 3547.91  145.55
 -12   1   0 3725.23  143.48
 -12   1   0 3509.23  152.91
 -12   1  -1  115.09   11.35
 -12  -1  -1  142.32   14.30
 -12  -1   1  149.27   14.47
 -12   1  -1  106.47   14.10
 -12  -1  -1  106.76   12.34
 -12   1   1  125.56   14.83
 -12  -1   1   95.57   13.19
 -12  -1   1  123.20    8.27
  12  -1   1  123.76    9.46
 -12   1   1  137.08    9.45
  12   1   1  129.14    8.20
 -12  -1  -2  882.63   44.24
 -12   1  -2  848.78   40.02
 -12  -1  -2  830.33   41.66
 -12  -1   2  823.58   44.73
 -12  -1   2  836.25   39.12
 -12   1  -2  906.55   45.81
  12   1   2  899.90   39.24
 -12   1   2  839.96   45.03
  12  -1   2  868.81   39.91
 -12   1   2  809.20   39.55
 -12   1   3  385.18   27.05
 -12  -1  -3  380.92   25.61
  12   1   3  390.96   23.06
  12  -1   3  367.64   23.17
 -12   1  -3  393.06   27.41
 -12   1  -3  338.73   21.52
 -12  -1  -3  394.65   24.35
 -12  -1   3  380.03   27.00
 -12  -1   3  408.54   23.69
 -12   1   4  593.69   37.82
 -12  -1  -4  615.44   34.48
 -12  -1  -4  605.32   36.43
 -12   1  -4  632.42   32.36
 -12   1   4  609.89   34.98
  12   1   4  582.52   34.09
  12  -1   4  587.04   34.39
 -12  -1   4  591.61   34.57
 -12  -1   4  593.53   38.03
  12   1   5   30.08   10.11
 -12   1   5   24.19   11.11
  12  -1   5   19.49    9.13
 -12  -1   5   23.11    9.84
 -12  -1   5   16.68   10.32
 -12   1   5   47.54   11.62
 -12  -1   6   96.35   19.10
  12  -1   6  131.39   19.23
 -12   1   6  120.94   19.22
 -12   1   6   97.05   19.03
  12   1   6   95.52   17.40
 -12  -1   6  107.87   18.94
 -12  -1   7   21.90   13.97
  12  -1   7    9.97   12.01
 -12   1   7   13.60   12.67
 -12  -1   7   15.43   13.13
  12   1   7   40.47   13.56
 -12   1   7   63.09   16.56
  12  -1   8   11.94   13.52
 -12  -1   8   30.69   15.46
  12   1   8   23.42   13.74
 -12   1   8   22.24   15.63
 -12   1   8   42.56   15.45
 -12  -1   8   33.08   16.90
  12   1   9   14.95   13.98
 -12  -1   9   22.63   17.10
  12  -1   9    7.01   12.64
 -12   1   9    7.82   15.14
 -12   1  10  323.58   40.99
  12  -1  10  280.93   38.36
  12   1  10  312.89   38.94
 -12  -1  10  232.33   37.11
 -12  -2   0 3261.11  132.56
 -12   2   0 3125.47  137.41
 -12  -2   0 3111.78  135.68
 -12   2   0 3232.93  129.12
 -12  -2   1 3062.26  122.99
  12  -2   1 3085.70  120.42
 -12   2   1 3085.98  133.04
 -12   2  -1 2906.75  132.44
 -12  -2   1 3219.39  129.10
 -12   2  -1 3111.28  123.96
 -12  -2  -1 3157.80  131.08
 -12  -2   1 3075.35  131.84
 -12  -2  -1 3108.34  127.50
  12  -2   1 3024.18  125.18
  12   2   1 3021.59  122.56
 -12   2   1 2917.55  124.46
 -12  -2   2  455.03   29.15
 -12   2   2  448.15   29.67
 -12   2  -2  497.10   24.69
  12   2   2  512.69   24.65
 -12   2  -2  492.64   30.39
 -12  -2   2  442.64   24.27
 -12  -2  -2  459.67   27.66
  12  -2   2  455.50   25.59
 -12   2   2  492.34   26.05
 -12  -2   3  748.73   42.88
 -12  -2  -3  823.55   40.72
  12  -2   3  767.28   39.09
 -12   2   3  753.66   42.45
 -12  -2   3  714.68   37.83
 -12   2  -3  759.14   35.86
  12   2   3  700.18   37.38
 -12   2  -3  796.24   43.65
 -12  -2   4  829.34   43.69
  12   2   4  782.94   42.42
 -12   2   4  802.08   46.17
 -12   2   4  831.60   44.09
 -12  -2   4  841.85   47.88
  12  -2   4  802.57   43.61
 -12   2  -4  813.65   39.35
 -12  -2   5   72.43   15.40
  12  -2   5   62.80   13.18
 -12   2   5   61.69   14.25
 -12   2   5   52.87   12.66
 -12  -2   5   87.56   14.93
  12   2   5   54.20   12.26
 -12  -2   6  150.96   23.40
  12   2   6  129.87   19.49
 -12   2   6  155.11   21.59
 -12   2   6  159.44   22.20
 -12  -2   6  147.88   21.20
  12  -2   6  148.17   20.50
 -12  -2   7   12.61   12.73
  12  -2   7   12.60   11.19
 -12   2   7    6.31   11.88
  12   2   7   -4.54   10.51
 -12  -2   7   21.05   12.65
 -12   2   7   -2.62   10.46
 -12   2   8   79.17   19.82
 -12  -2   8  118.34   23.32
  12   2   8   81.72   19.10
 -12  -2   8   70.84   21.31
  12  -2   8   42.69   16.13
 -12   2   8   89.87   21.47
  12  -2   9   24.43   14.95
  12   2   9   39.16   16.55
 -12  -2   9   27.95   17.34
 -12   2   9   -3.34   14.48
 -12   3   0 3816.21  165.86
 -12  -3   0 3863.79  163.00
  12   3   0 4019.05  155.33
 -12   3   0 3950.26  158.33
 -12  -3   0 3745.69  159.70
 -12  -3  -1    2.22    5.71
 -12  -3  -1    2.01    4.04
 -12   3  -1    1.59    3.97
 -12   3  -1   12.20    6.79
  12   3   1    2.70    3.53
  12  -3   1    3.74    5.18
 -12   3   1   12.86    7.95
  12  -3   1    7.09    4.90
 -12  -3   1   11.78    6.70
 -12  -3   1   -1.44    3.84
 -12   3   1   17.96    6.19
 -12  -3   1   11.42    6.65
 -12  -3   2 1664.19   74.59
 -12   3  -2 1671.95   67.02
 -12  -3   2 1576.90   75.10
 -12  -3   2 1586.57   69.33
  12  -3   2 1567.48   70.97
 -12  -3  -2 1550.95   72.58
  12   3   2 1683.44   69.27
 -12   3   2 1483.14   70.86
 -12   3  -2 1639.99   77.11
 -12  -3  -2 1583.60   72.67
 -12   3   2 1619.50   75.79
 -12   3  -3   84.10    8.64
 -12   3  -3  108.16   16.14
 -12   3   3  108.68   14.61
 -12  -3  -3   81.66   13.21
  12   3   3   98.16   11.75
 -12  -3   3  108.51   12.20
 -12  -3   3  100.06   15.17
  12  -3   3   73.30   11.45
 -12  -3  -3   99.14   12.41
 -12   3   3  124.84   13.82
 -12   3  -4  250.02   15.52
  12  -3   4  249.34   21.35
 -12   3   4  244.70   21.71
 -12   3   4  196.78   21.05
 -12  -3  -4  244.65   19.58
 -12  -3   4  246.83   19.85
  12   3   4  207.64   18.90
 -12  -3   4  218.26   22.92
 -12  -3   5   16.94    9.18
  12   3   5   11.28    8.05
 -12   3   5    8.86    8.18
  12  -3   5    4.31    7.73
 -12   3  -5   23.16    5.85
 -12  -3   5    9.51    9.81
 -12   3   5   11.94    9.14
 -12  -3  -5   -6.80    5.74
  12   3   6   11.85    9.49
 -12   3   6   26.94   11.58
  12  -3   6   25.52   11.94
 -12  -3   6   -3.01    8.90
 -12   3   6    4.78   10.75
 -12  -3   6    4.95    9.53
 -12  -3   7   14.80   12.19
  12   3   7    8.00   10.73
 -12   3   7    8.50   11.97
 -12   3   7    0.12   10.60
  12  -3   7    6.26   11.54
 -12  -3   7   10.50   12.06
  12  -3   8   16.24   12.41
 -12  -3   8   31.43   14.96
  12   3   8    4.25   12.41
 -12   3   8    3.34   13.84
 -12  -3   8    8.12   13.47
 -12   3   8   -6.69   10.27
 -12  -3   9    9.53   16.88
 -12   3   9    9.97   15.19
  12   3   9   11.07   13.67
  12  -3   9   -4.71   14.19
 -12   4   0 1149.13   60.65
 -12  -4   0 1267.00   59.40
 -12   4   0 1302.33   57.30
  12   4   0 1240.12   53.45
 -12  -4   1 1008.63   51.08
 -12  -4   1 1057.03   47.11
 -12  -4  -1 1101.87   50.06
  12  -4   1 1005.56   47.37
 -12   4  -1  967.73   53.11
  12  -4   1 1040.87   49.66
 -12  -4   1 1081.56   52.41
 -12   4   1 1092.56   49.57
 -12  -4  -1  981.55   51.14
 -12  -4   1 1061.70   45.24
  12   4   1 1044.70   46.16
 -12   4   1 1031.85   53.57
 -12  -4   2  224.88   19.36
 -12  -4   2  204.95   15.37
 -12  -4  -2  218.17   19.33
 -12  -4  -2  189.55   15.44
 -12   4   2  193.19   19.05
  12  -4   2  207.53   16.72
 -12   4  -2  191.83   19.80
 -12  -4   2  227.26   20.37
 -12   4  -2  211.09   11.94
  12   4   2  195.02   14.31
  12  -4   3 1446.71   67.41
 -12   4   3 1376.74   67.07
 -12  -4   3 1389.05   70.61
 -12  -4   3 1363.85   65.28
  12   4   3 1430.15   65.26
 -12  -4  -3 1467.98   68.39
 -12   4   3 1380.93   69.32
 -12   4  -3 1439.53   71.91
 -12  -4  -3 1395.12   65.66
 -12   4  -3 1504.07   59.31
 -12   4  -4  647.30   29.92
 -12   4   4  592.80   37.83
  12  -4   4  686.51   38.23
 -12  -4   4  681.12   37.06
 -12   4   4  595.74   37.13
 -12  -4   4  477.81   37.97
  12   4   4  646.86   36.41
 -12  -4  -4  676.94   35.87
 -12  -4   5  220.23   26.01
 -12   4   5  225.77   23.12
 -12   4   5  236.22   23.56
  12  -4   5  191.03   22.14
 -12  -4  -5  228.28   20.31
 -12   4  -5  215.40   14.80
 -12  -4   5  207.24   21.69
  12   4   5  178.45   20.11
  12  -4   6   76.58   16.31
 -12   4   6   58.14   14.80
 -12  -4   6   44.23   14.20
 -12   4   6   55.95   15.45
 -12  -4   6   58.76   15.09
  12   4   6   28.52   12.59
  12   4   7   29.67   13.37
 -12   4   7   -2.10   10.86
 -12   4   7   10.04   11.46
 -12  -4   7   16.52   13.78
 -12  -4   7   17.62   12.51
  12  -4   7   12.71   12.09
  12  -4   8  123.61   24.40
 -12   4   8  156.33   27.07
  12   4   8  132.73   23.78
 -12  -4   8  158.56   26.88
 -12   4   8  125.02   23.31
 -12   4   9  215.23   32.32
 -12  -4   9  156.90   29.97
  12  -4   9  121.83   26.33
  12   4   9  146.16   26.56
  12   5   0 1622.57   70.16
 -12  -5   0 1666.86   73.42
 -12  -5   0 1682.00   75.59
 -12   5   0 1539.66   76.81
 -12  -5  -1  107.75   11.38
 -12  -5   1  114.78   15.15
 -12   5  -1   95.91   14.53
 -12  -5   1  103.00   11.38
 -12  -5  -1  106.98   14.95
 -12  -5   1  131.29   11.72
 -12  -5   1  106.03   12.80
  12   5   1  119.99   10.92
 -12   5   1  100.48   14.51
  12   5   2  652.40   32.68
 -12   5   2  596.15   36.28
  12  -5   2  604.27   35.30
 -12  -5   2  623.00   33.55
 -12   5  -2  627.63   38.12
  12  -5   2  596.32   33.63
 -12  -5   2  655.58   36.90
 -12  -5  -2  631.99   36.59
 -12   5   2  589.18   35.19
 -12  -5  -2  629.04   32.56
 -12  -5   2  659.96   37.38
 -12   5  -3    1.95    5.81
  12   5   3    1.12    5.31
 -12  -5  -3   11.38    6.02
 -12   5   3    7.45    6.66
 -12  -5  -3    5.66    6.04
 -12  -5   3    2.11    4.59
 -12  -5   3    9.25    8.12
 -12   5   3    3.35    6.97
  12  -5   3    0.42    5.87
  12  -5   4  898.86   49.53
 -12   5   4  872.04   49.20
 -12   5   4  875.35   49.61
 -12  -5   4  859.04   47.57
 -12  -5   4  887.40   51.96
  12   5   4  903.07   47.92
 -12   5  -4  929.95   38.82
 -12  -5  -4  957.09   46.03
 -12  -5   5   18.38   10.29
 -12   5   5   21.23   12.06
 -12   5   5   13.33    8.86
  12   5   5   16.92    9.43
 -12  -5   5   20.48   12.17
 -12  -5  -5    3.08    6.38
  12  -5   5    1.19    8.80
  12   5   6   62.91   15.40
 -12  -5   6   63.74   15.71
 -12   5   6   49.36   13.59
 -12   5   6   27.29   13.34
 -12  -5  -6   81.79   13.85
  12  -5   6   61.36   15.60
 -12  -5   6   34.33   14.97
 -12   5   7   11.80   10.83
  12  -5   7   11.22   12.19
 -12  -5   7  -20.45   11.00
 -12  -5   7   33.54   14.77
  12   5   7   16.69   12.02
 -12   5   7   15.94   12.10
  12   5   8   73.90   18.76
 -12   5   8   78.23   19.34
  12  -5   8   69.40   19.83
 -12   5   8   79.05   20.85
 -12  -5   8   69.57   20.05
 -12  -5   9   10.31   16.14
  12   5   9   12.16   14.01
  12  -5   9    8.69   14.14
 -12   5   9   15.22   15.50
 -12   6   0 1633.32   75.15
 -12  -6   0 1712.23   73.02
 -12  -6   0 1455.12   74.47
 -12   6   0 1661.25   78.29
  12   6   0 1609.18   71.45
 -12  -6   1 1466.17   68.42
  12   6   1 1415.39   64.01
 -12   6   1 1487.94   67.80
 -12  -6  -1 1361.71   67.58
 -12   6  -1 1427.17   70.31
 -12   6   1 1387.44   69.08
  12   6  -1 1333.91   64.04
 -12   6  -1 1435.96   67.83
 -12  -6  -1 1437.59   63.58
 -12   6  -2  227.30   22.34
 -12   6   2  187.46   19.32
 -12  -6   2  228.98   18.30
  12  -6   2  218.26   20.32
  12  -6   2  210.13   19.34
 -12   6   2  205.63   19.52
 -12  -6   2  233.69   19.42
 -12  -6   2  223.01   17.27
  12   6   2  210.74   17.01
 -12  -6   2  248.51   22.36
 -12  -6  -2  229.26   21.52
 -12  -6  -2  221.19   15.36
 -12  -6  -3 1202.48   60.34
 -12   6   3 1101.15   58.78
 -12   6  -3 1211.92   63.29
 -12  -6  -3 1178.93   54.03
  12  -6   3 1144.77   59.60
  12   6   3 1149.36   56.83
 -12   6   3 1172.12   59.74
 -12  -6   3 1161.22   60.62
  12  -6   4  225.91   24.12
 -12  -6   4  282.45   27.27
 -12  -6   4  300.91   23.42
 -12  -6  -4  293.83   27.11
 -12   6   4  325.76   27.34
  12   6   4  286.50   23.07
 -12   6   4  292.59   23.25
 -12  -6  -4  255.67   19.12
 -12  -6   5   65.50   15.17
 -12  -6  -5   41.77    9.45
 -12   6   5   96.88   18.66
  12   6   5   82.85   15.29
 -12  -6   5   55.16   15.96
 -12   6   5   56.95   12.81
  12  -6   5   45.90   14.01
  12   6   6   94.69   18.24
 -12  -6   6   81.98   19.25
 -12   6   6   75.22   18.23
 -12  -6   6  115.54   20.13
  12  -6   6   77.90   17.60
 -12   6   6   80.59   16.21
  12   6   7   43.32   15.38
 -12  -6   7   45.67   16.47
 -12   6   7   51.86   18.10
 -12  -6   7   37.47   18.67
  12  -6   7   28.23   15.14
 -12   6   7   58.95   15.89
 -12   6   8  257.21   29.31
 -12  -6   8  220.13   31.64
  12  -6   8  188.91   30.19
 -12   6   8  245.20   33.84
  12   6   8  222.01   30.24
  12  -6   9   22.90   16.86
 -12   6   9   59.71   21.59
  12   6   9   61.86   18.67
 -12  -6   9   19.89   20.00
 -12   7   0 2680.19  121.93
  12   7   0 2788.14  118.79
 -12  -7   0 2836.54  118.88
 -12  -7   0 2741.52  121.82
 -12   7   0 2867.57  125.29
  12   7  -1   40.38    9.19
 -12  -7   1   30.72   10.23
 -12  -7   1   52.77    9.86
 -12  -7  -1   27.53    6.55
  12   7   1   33.82    8.40
 -12   7   1   44.45   11.27
 -12   7   1   31.12   10.76
 -12  -7  -1   45.75   11.83
 -12   7  -1   44.39   11.43
 -12   7  -1   31.18   10.05
 -12  -7  -2  567.07   27.60
 -12  -7   2  533.55   33.04
 -12  -7   2  545.51   34.58
 -12  -7   2  549.70   32.29
 -12   7  -2  447.31   33.69
  12   7   2  525.41   31.09
 -12  -7  -2  447.58   33.15
 -12   7   2  515.70   33.29
 -12   7   2  563.18   34.56
  12  -7   2  531.41   34.23
  12  -7   2  573.03   33.66
 -12  -7   2  575.74   31.46
 -12  -7   3   55.52   13.24
 -12  -7  -3   83.60    9.42
 -12   7   3   93.43   16.71
 -12  -7  -3   83.53   16.17
 -12   7   3   84.02   13.93
  12   7   3   99.95   13.90
 -12  -7   3   63.98   11.91
 -12  -7   3   80.71   15.19
  12  -7   3   94.15   15.75
 -12   7  -3   71.77   15.37
  12   7   4   95.64   15.64
 -12  -7  -4   95.44   10.97
 -12  -7   4  103.59   16.48
 -12   7   4  102.41   15.27
  12  -7   4  115.86   18.93
 -12   7   4  113.72   18.95
 -12  -7   4  129.36   19.53
 -12  -7  -4   91.52   16.87
 -12  -7   5    8.44    9.86
 -12  -7   5   15.92   10.92
 -12   7   5   35.53   16.49
 -12   7   5   18.35    8.44
  12   7   5    0.49    8.63
  12  -7   5   -2.60    9.49
  12  -7   6    5.99   11.55
  12   7   6   -5.15    8.87
 -12   7   6   -6.04    8.39
 -12   7   6   10.04   12.64
 -12  -7   6   -0.88   10.81
 -12  -7   6    8.57   12.55
 -12   7   7   11.66   14.06
 -12  -7   7   17.10   13.97
 -12   7   7   16.66   11.37
  12  -7   7    3.46   11.88
  12   7   7  -15.45    9.93
  12   7   8   20.73   15.20
  12  -7   8   32.40   17.35
 -12  -7   8   19.90   17.48
 -12   7   8    4.97   16.75
 -12  -7   9   22.59   19.95
  12   7   9   -0.22   14.30
 -12   7   9   41.16   19.30
  12  -7   9   20.65   16.61
 -12   8   0  520.51   33.84
 -12  -8   0  475.56   27.35
  12   8   0  518.86   30.14
 -12   8   0  515.26   33.17
 -12  -8   0  439.48   31.94
  12   8   1  703.01   39.21
 -12   8   1  698.40   41.92
  12   8  -1  712.65   40.07
 -12   8  -1  755.85   43.92
 -12   8  -1  784.19   44.37
 -12   8   1  723.42   43.29
 -12  -8  -1  706.01   42.57
 -12  -8   1  810.87   43.78
 -12  -8  -1  706.17   35.04
 -12  -8   1  735.63   39.34
 -12  -8  -2  101.59    8.82
  12   8   2   82.39   13.24
 -12   8  -2   81.69   15.76
  12  -8   2  105.60   16.99
 -12  -8   2   90.50   15.27
 -12   8   2   80.59   13.80
 -12  -8  -2   91.93   16.33
  12  -8   2  112.23   16.42
 -12   8   2   87.21   16.15
 -12  -8   3  389.15   29.42
 -12   8   3  385.48   30.53
  12   8   3  416.27   28.03
 -12  -8   3  402.98   29.31
 -12   8   3  422.31   28.14
  12  -8   3  361.05   28.83
 -12   8  -3  434.29   32.01
 -12  -8   3  379.68   29.30
  12  -8   3  355.65   29.88
 -12  -8  -3  361.40   30.21
 -12  -8   4  377.35   30.32
  12  -8   4  354.71   31.16
 -12   8   4  315.62   24.62
  12   8   4  292.81   26.37
 -12   8   4  389.46   32.47
 -12  -8  -4  237.48   27.15
 -12  -8   4  312.23   28.09
  12   8   5   30.69   13.13
 -12   8   5   19.56    7.94
 -12  -8   5   23.14   13.37
 -12   8   5   16.14   12.27
  12  -8   5   29.63   13.20
 -12  -8   5   25.43   13.45
  12  -8   6  140.58   24.66
 -12   8   6  197.05   28.89
 -12  -8   6  146.05   24.09
 -12   8   6  164.55   21.12
  12   8   6  156.50   23.51
  12   8   7   -2.78   10.67
 -12   8   7    1.70   15.27
  12  -8   7   15.90   13.04
 -12  -8   7    7.79   13.20
  12   8   8   97.24   22.70
 -12  -8   8  155.69   27.68
 -12   8   8  134.46   27.79
  12  -8   8  133.94   27.88
 -12  -8   9   25.57   20.76
  12   8   9   30.72   18.69
 -12   8   9   50.18   22.41
  12  -8   9   34.87   21.07
 -12   9   0  754.33   45.37
  12   9   0  725.84   41.78
 -12  -9   0  807.19   38.76
 -12  -9   0  751.39   44.87
 -12   9   0  756.26   44.70
 -12  -9   1  312.54   26.10
  12   9  -1  250.72   22.18
 -12  -9  -1  218.41   14.79
 -12   9   1  232.51   22.54
  12   9   1  230.19   21.05
 -12  -9  -1  186.26   22.55
 -12   9   1  198.60   23.29
 -12   9  -1  223.86   23.01
 -12  -9   1  253.72   19.38
 -12   9  -1  257.99   25.06
 -12  -9   2  326.68   25.32
 -12   9  -2  323.53   28.64
 -12   9   2  335.32   25.24
  12   9   2  350.20   25.34
 -12  -9   2  332.33   26.58
 -12  -9   2  310.17   23.83
 -12  -9  -2  317.57   29.09
 -12   9  -2  309.90   28.82
 -12   9   2  324.39   29.07
 -12  -9   2  251.42   22.10
 -12  -9  -3    1.91    9.71
 -12   9   3    7.25    6.99
 -12  -9   3   10.17    8.98
  12   9   3   19.79    9.61
  12  -9   3   12.00   10.91
 -12  -9   3    9.90    9.20
  12  -9   3   11.93   10.45
 -12   9   3    5.56   11.19
 -12  -9   3   13.43    9.45
 -12  -9   3   -3.27    8.82
 -12   9  -3   38.62   12.81
  12  -9   4  523.19   39.39
 -12  -9   4  545.54   37.50
  12  -9   4  510.52   37.52
 -12  -9   4  487.53   36.51
 -12   9   4  496.84   32.89
 -12  -9  -4  562.09   38.80
 -12   9   4  525.14   40.70
  12   9   4  553.88   36.92
  12   9   5   41.54   14.58
 -12  -9   5   45.51   14.96
 -12   9   5   50.31   20.10
 -12   9   5   46.72   10.86
 -12  -9   5   32.54   13.86
  12  -9   5   29.25   14.20
  12   9   6  -12.63    9.47
  12  -9   6   33.76   16.09
 -12  -9   6   25.24   14.55
 -12   9   6   34.40   16.77
 -12   9   7   -6.92   15.36
  12  -9   7   17.11   14.61
 -12  -9   7   17.87   14.92
  12   9   7    8.11   12.52
  12  -9   8   37.00   19.44
  12   9   8   26.42   17.35
 -12  -9   8    9.85   17.37
 -12   9   8   24.03   17.56
 -12 -10   0  681.03   34.68
 -12 -10   0  686.89   42.54
 -12  10   0  647.89   42.81
  12  10   0  639.46   39.30
 -12  10   0  671.38   41.41
 -12 -10   1  198.92   17.66
  12  10   1  231.34   22.03
 -12  10  -1  163.81   23.08
 -12  10  -1  197.09   22.37
 -12  10   1  217.36   21.71
  12  10  -1  203.13   21.52
 -12  10   1  210.48   24.68
 -12 -10   1  150.08   21.17
 -12 -10  -1  213.36   23.99
 -12  10  -2  172.10   23.57
 -12 -10   2  147.58   20.54
  12  10  -2  141.88   19.21
 -12  10   2  166.55   18.92
 -12  10  -2  165.70   22.26
 -12  10   2  168.42   23.65
 -12 -10   2  148.84   17.89
 -12 -10  -2  159.93   21.93
  12  10   2  172.92   19.49
 -12 -10   3  684.97   44.75
 -12  10   3  571.48   43.94
 -12  10   3  784.63   41.63
 -12 -10   3  710.01   44.07
  12 -10   3  716.82   45.36
  12 -10   3  617.29   45.01
 -12  10  -3  654.02   44.75
 -12 -10  -3  707.94   46.12
 -12 -10   3  714.38   42.84
  12  10   3  699.95   43.14
 -12 -10   3  705.77   43.46
 -12 -10   4  281.36   28.45
 -12 -10   4  245.55   26.92
 -12 -10   4  265.38   28.27
 -12  10   4  306.56   32.25
  12  10   4  292.30   28.04
  12 -10   4  286.79   29.99
  12 -10   4  243.62   29.37
 -12 -10  -4  259.62   29.06
 -12  10   4  234.01   21.78
  12  10   5  164.95   23.83
 -12 -10  -5  137.88   23.20
  12 -10   5  158.18   26.13
 -12  10   5  136.92   25.31
 -12 -10   5   89.93   21.45
  12 -10   6  123.97   24.60
  12  10   6  123.21   23.18
 -12  10   6  168.07   28.82
 -12 -10   6  122.92   24.44
  12 -10   7   15.51   15.73
 -12  10   7   34.68   19.33
 -12 -10   7   28.23   16.46
  12  10   7   54.43   18.39
 -12 -10   8  152.01   30.10
 -12  10   8   72.70   23.11
  12 -10   8   69.88   22.89
  12  10   8  148.57   28.35
 -12  11   0 1052.74   61.18
 -12 -11   0 1090.18   60.19
 -12  11   0 1083.69   59.08
  12  11   0 1039.16   57.45
  12  11  -1    4.48    9.08
 -12  11   1   18.97    9.27
 -12  11  -1    9.27   11.89
 -12 -11   1  -13.45    7.89
 -12  11   1   10.00   12.49
 -12 -11   1   21.49    8.20
 -12 -11  -1   15.85   10.47
 -12  11  -1    2.82    7.74
  12  11   1    5.71    9.05
 -12  11  -2  245.94   28.48
  12  11  -2  245.17   25.82
  12  11   2  234.88   24.36
 -12 -11   2  212.82   24.58
 -12 -11  -2  212.66   26.28
 -12  11   2  276.64   22.69
 -12  11  -2  235.58   26.12
 -12 -11   2  209.99   21.20
 -12  11   2  222.68   27.72
  12 -11   3   68.38   18.48
 -12 -11  -3   86.33   19.00
 -12  11   3  113.85   22.01
 -12 -11   3  133.30   21.00
  12  11   3  120.27   19.79
 -12 -11   3  120.02   19.86
 -12  11  -3  113.45   20.14
  12 -11   3  114.18   21.94
  12 -11   4   50.36   17.03
 -12  11  -4   30.91   14.45
 -12 -11   4   98.81   19.29
  12  11   4   72.72   17.32
 -12 -11   4   69.16   17.37
  12 -11   4   74.69   18.38
 -12  11   4   40.99   18.08
 -12 -11  -4   45.14   14.95
  12 -11   5   -0.65   11.12
 -12 -11   5  -17.25   10.08
 -12 -11   5   28.14   15.03
  12 -11   5   -4.33   10.71
  12  11   5    3.46   10.54
 -12 -11  -5   -2.45   10.81
 -12  11   5   -3.51   15.33
 -12 -11   6    7.11   14.23
  12 -11   6   -3.63   12.36
 -12 -11  -6    9.76   11.77
  12  11   6   -3.39   11.77
 -12  11   6   18.12   18.68
 -12 -11   7   12.90   17.08
  12  11   7   13.90   13.23
  12 -11   7   -1.95   14.98
 -12  11   7   14.32   18.33
  12  11   8   19.87   17.16
 -12 -11   8    1.42   17.98
  12 -11   8   12.92   17.85
 -12  11   8   12.87   18.29
  12  12   0  509.24   37.03
 -12  12   0  500.93   40.14
 -12  12   0  578.84   38.09
 -12 -12   0  592.35   40.43
 -12  12  -1  749.82   51.98
  12  12  -1  783.15   49.50
  12  12   1  800.87   48.41
 -12  12   1  739.40   51.41
 -12  12   1  818.83   47.29
 -12 -12  -1  809.75   51.14
 -12  12  -1  860.45   51.08
 -12  12  -2  101.63   21.70
 -12  12   2  123.48   22.91
  12  12  -2  116.39   20.68
  12  12   2  115.94   19.29
 -12 -12   2   85.04   18.15
 -12  12  -2  128.66   20.51
 -12 -12  -2   98.94   19.93
 -12  12   3  190.50   29.16
 -12  12  -3  150.13   25.46
  12  12   3  119.48   21.52
 -12 -12  -3  215.19   26.94
 -12  12  -3  189.16   25.30
 -12 -12   3  161.13   22.55
  12 -12   4  465.14   42.95
  12  12   4  555.30   40.24
 -12 -12  -4  478.83   38.73
 -12  12   4  521.61   44.43
  12 -12   4  426.86   40.76
 -12 -12   4  483.17   39.30
 -12 -12   4  485.35   37.91
 -12  12  -4  461.80   38.22
 -12  12   5   -2.88   14.61
  12  12   5   -1.51   10.97
  12 -12   5    6.72   12.84
 -12 -12  -5   -3.20   11.67
  12 -12   5   21.31   15.19
 -12 -12   5    5.75   12.19
 -12 -12   5    3.29   13.07
  12 -12   6   63.00   21.32
 -12  12   6   52.24   21.49
  12 -12   6   59.03   20.14
 -12 -12   6   99.68   23.59
 -12 -12  -6   47.40   16.61
  12  12   6   56.85   20.27
 -12 -12   6   74.37   21.03
  12  12   7   21.18   17.21
 -12  12   7   -5.51   17.17
  12 -12   7   -3.05   13.83
 -12 -12  -7    8.50   13.73
  12 -12   7   18.77   16.10
 -12 -12   7   -0.20   16.05
 -12  13   0  758.09   51.53
 -12 -13   0  707.93   47.27
  12  13   0  688.70   45.63
 -12  13   0  665.09   43.88
 -12  13  -1  -18.06   10.92
  12  13   1   11.40   11.32
 -12  13  -1   -5.22    8.76
 -12  13   1   -4.89   12.30
  12  13  -1   16.48   12.26
 -12 -13  -1    6.59   11.40
 -12 -13   1   -6.93   10.00
  12  13  -2  217.10   27.23
 -12  13   2  216.09   29.96
 -12  13  -2  186.98   25.67
 -12  13  -2  225.35   30.78
  12  13   2  217.66   26.35
 -12 -13  -2  218.74   28.26
 -12  13   3   47.89   19.43
  12  13  -3   38.48   14.57
  12  13   3   45.59   15.57
 -12  13  -3   46.40   18.53
 -12 -13   3   46.27   15.08
 -12  13  -3   20.30   13.41
 -12 -13  -3   31.61   15.36
 -12 -13  -4  132.61   25.07
 -12  13  -4  245.30   30.64
 -12 -13   4  173.64   27.55
  12 -13   4  234.87   33.58
 -12  13   4  217.76   32.21
 -12 -13   4  221.34   28.76
  12 -13   4  196.06   29.99
  12  13   4  166.06   26.27
 -12 -13   5    7.03   14.57
  12  13   5   25.46   15.04
 -12 -13   5    3.27   14.00
  12 -13   5   -1.20   12.90
 -12 -13  -5    7.16   13.16
 -12  13   5   11.53   19.20
  12 -13   5    1.33   14.22
 -12  13  -5    3.38   12.78
 -12 -13   6   13.43   15.64
 -12 -13   6   16.03   17.56
 -12 -13  -6   26.89   14.48
 -12  13   6   24.27   18.32
  12 -13   6   19.80   17.91
  12 -13   6   19.35   16.78
  12  13   6   30.08   16.40
 -12  13   7   15.43   21.37
 -12 -13   7   31.65   19.32
 -12 -13  -7   -0.23   12.19
  12 -13   7   16.08   17.88
  12  13   7    5.08   16.65
 -12 -13   7   36.33   18.43
  12 -13   7    9.73   18.46
  12  14   0  328.70   32.68
 -12 -14   0  287.84   32.11
 -12  14   0  327.71   36.01
 -12  14  -1  301.15   29.87
 -12  14   1  250.19   32.96
 -12  14  -1  305.28   35.37
 -12 -14   1  272.28   30.63
  12  14  -1  313.15   31.92
 -12 -14  -1  268.22   31.26
  12  14   1  248.60   29.59
 -12  14  -2   25.05   14.25
  12  14  -2   95.40   20.74
 -12  14   2   72.79   21.38
 -12 -14  -2   83.85   20.48
  12  14   2   43.33   15.51
 -12  14  -2   76.90   21.51
 -12 -14   3  401.72   35.48
 -12  14  -3  397.20   40.66
  12  14  -3  338.34   35.88
 -12  14   3  331.88   38.57
 -12  14  -3  339.72   35.10
  12  14   3  389.09   36.15
 -12 -14  -3  364.65   37.41
  12  14  -4  254.77   32.08
 -12  14   4  265.01   36.39
 -12 -14  -4  269.02   33.56
 -12  14  -4  241.94   31.22
  12  14   4  225.09   30.48
 -12  14  -4  214.64   33.62
 -12 -14   5  167.81   29.52
  12 -14   5  183.49   30.55
 -12 -14   5  199.03   31.12
 -12 -14  -5  167.19   28.76
  12  14   5  225.85   30.88
 -12  14   5  145.49   30.94
  12 -14   5  196.49   33.21
 -12  14  -5  174.95   28.61
 -12  14   6   85.11   29.31
  12 -14   6  102.29   26.46
 -12 -14   6   59.21   21.65
  12 -14   6   37.35   21.39
 -12 -14   6   87.59   22.97
 -12 -14  -6   59.73   20.54
  12  14   6   42.84   18.84
 -12  14  -6   82.09   22.19
 -12 -15   0  592.41   44.99
 -12  15   0  614.66   48.78
  12  15   0  620.50   46.49
 -12  15   1    4.25   15.77
 -12 -15   1   22.01   14.08
  12  15   1   11.06   13.57
 -12 -15  -1    4.66   12.98
 -12  15  -1   27.93   18.53
  12  15  -1   19.34   13.40
  12  15  -2  201.24   29.73
 -12  15  -2  249.60   30.11
  12  15   2  251.45   30.53
 -12 -15   2  266.53   30.08
 -12 -15  -2  248.99   31.46
 -12  15  -2  264.53   35.65
 -12  15   2  251.84   35.39
 -12  15   3   74.14   23.31
  12  15  -3   75.68   20.36
 -12  15  -3   53.81   19.12
 -12  15  -3   78.27   19.97
  12  15   3   61.34   18.89
 -12 -15  -3   29.38   16.38
  12  15  -4  167.87   28.36
 -12  15  -4  130.39   25.34
 -12 -15  -4  181.16   29.49
  12  15   4  208.18   30.18
 -12  15  -4  184.13   31.44
 -12  15   4  165.10   31.22
  12  15   5    9.93   15.52
 -12 -15  -5   19.45   16.28
 -12  15  -5   -3.60   13.43
 -12  15   5   53.37   21.81
 -12 -15  -6    4.32   15.65
  12  15   6  -13.69   14.10
 -12 -15   6   18.10   19.90
 -12  15  -6   20.88   16.19
 -12 -15   6    2.22   16.90
 -12  15   6    5.80   18.38
  12 -15   6   17.52   18.95
  12 -15   6   -2.75   17.51
 -12  16   0  259.54   36.47
 -12 -16   0  323.41   34.68
  12  16   0  250.02   32.56
 -12  16  -1  540.37   50.02
 -12 -16  -1  526.20   45.03
 -12 -16   1  490.91   42.66
 -12  16   1  528.27   48.94
  12  16   1  555.15   43.45
  12  16  -1  522.92   42.53
  12  16   2  100.88   22.58
 -12  16  -2  100.78   25.11
 -12 -16  -2   54.15   18.50
  12  16  -2   93.99   23.17
 -12  16   2  118.39   26.89
 -12  16   3  267.25   37.13
  12  16   3  241.08   32.52
  12  16  -3  215.78   31.89
 -12  16  -3  270.87   32.91
 -12  16  -3  276.20   38.42
 -12 -16  -3  271.34   35.20
  12  16   4  188.47   30.06
 -12 -16  -4  148.35   28.32
  12  16  -4  179.61   29.96
 -12  16  -4  152.68   27.75
 -12  16   4  174.31   32.34
 -12  16  -4  111.09   28.79
  12  16  -5   18.05   17.45
  12  16   5   20.67   17.17
 -12  16  -5    0.91   14.26
 -12 -16  -5  -16.09   13.82
 -12  16  -5    5.78   16.99
 -12  16   5    6.61   19.05
  12  17   0  795.75   59.92
 -12 -17   0 1040.15   64.33
 -12  17   0  978.55   68.09
 -12  17   1   61.10   21.74
 -12  17  -1   53.19   21.73
  12  17   1   46.67   17.07
  12  17  -1   29.10   18.18
 -12 -17  -1   35.99   18.72
 -12  17  -2  297.62   40.29
 -12  17   2  309.26   41.59
  12  17  -2  253.20   35.38
 -12 -17  -2  203.07   32.52
  12  17   2  235.77   32.72
  12  17   3   25.05   16.10
 -12  17   3    6.20   18.89
 -12 -17  -3    6.33   15.18
  12  17  -3    7.81   15.77
 -12  17  -3  -19.66   16.33
  12  17   4   66.10   21.86
 -12 -17  -4   83.66   23.39
 -12  17   4   80.98   27.86
 -12  17  -4   71.33   24.65
  12  17  -4   86.91   22.64
 -12 -18   0  277.88   34.95
 -12  18   0  232.44   38.42
  12  18   0  204.78   33.18
 -12  18  -1  183.70   35.35
 -12 -18  -1  223.77   32.51
  12  18   1  161.90   29.13
  12  18  -1  208.73   32.53
 -12  18   1  209.38   35.60
 -12  18   2   22.12   20.13
  12  18  -2   50.73   20.11
 -12  18  -2   15.59   19.61
  12  18   2   25.80   16.44
 -12 -18  -2   15.01   18.03
  12  18  -3  256.72   36.82
 -12  18  -3  191.74   35.81
  12  18   3  318.21   38.17
 -12 -18  -3  315.16   39.03
 -12  18   3  323.25   43.32
  12  19   0  223.55   35.11
 -12  19   0  210.58   37.28
 -12  19  -1   -5.79   17.44
  12  19   1   43.03   20.45
 -12  19   1   29.87   21.16
 -12 -19  -1   19.36   19.88
  12  19  -1   37.39   19.59
 -12  19   2  229.24   38.23
  12  19  -2  161.04   31.60
 -12  19  -2  177.66   35.77
  12  19   2  170.07   30.57
 -13   0   0    1.12    5.46
 -13   0   0   -2.33    5.75
  13   0   1  486.14   21.80
 -13   0   1  417.53   28.94
 -13   0  -1  502.63   30.10
 -13   0   1  474.88   21.87
 -13   0  -1  485.31   26.92
 -13   0   2 1031.15   54.91
 -13   0  -2 1112.04   54.97
 -13   0   2 1084.51   48.53
  13   0   2 1092.58   48.19
 -13   0  -2 1096.19   50.51
  13   0   3  107.64   11.76
 -13   0   3  112.52   15.87
 -13   0  -3  101.09   14.72
 -13   0   3  106.84   12.10
 -13   0  -3  104.38   12.32
 -13   0   4 2128.29  101.75
 -13   0  -4 2136.56  100.09
  13   0   4 2118.68   95.61
 -13   0   4 2086.73   95.83
 -13   0  -4 2295.22   94.21
 -13   0   5  221.50   21.63
 -13   0   5  224.08   24.68
  13   0   5  221.07   21.39
 -13   0   6  845.30   50.16
  13   0   6  765.46   48.09
 -13   0   6  903.56   53.88
 -13   0   7    7.17   12.34
  13   0   7   21.87   12.37
 -13   0   7   14.02   12.69
 -13   0   8  189.73   30.03
  13   0   8  206.05   27.95
 -13   0   8  176.27   27.82
 -13   0   9   66.71   21.70
  13   0   9   64.73   19.50
 -13  -1   0   -1.94    5.37
 -13  -1   0    2.05    6.21
 -13   1   0    6.68    5.39
 -13   1   0  -10.96    5.41
 -13   1   0   -6.70    3.09
  13  -1   1   14.88    4.38
 -13  -1   1    7.71    5.86
 -13  -1  -1   14.03    6.56
 -13   1   1   18.88    4.50
 -13  -1   1   17.46    3.67
  13   1   1   14.24    3.12
 -13  -1   1    7.05    6.86
 -13   1  -1    5.73    5.04
 -13   1  -1   16.10    8.02
 -13   1   1    6.43    6.97
 -13  -1  -1    8.49    6.85
 -13   1   2    4.49    7.08
 -13  -1  -2   22.18    7.05
 -13  -1   2   23.49    8.07
 -13   1   2   14.93    5.75
  13  -1   2   11.13    4.79
 -13  -1  -2   19.32    7.86
 -13  -1   2   10.18    4.84
  13   1   2   13.50    4.98
 -13   1  -2    7.30    6.87
 -13   1  -2   12.38    5.68
 -13   1   3 3624.22  164.17
 -13   1   3 3770.99  157.50
 -13  -1   3 3710.48  156.90
 -13  -1  -3 3854.80  163.03
 -13   1  -3 3817.34  164.57
 -13  -1  -3 3980.06  156.93
 -13  -1   3 3825.63  165.07
 -13   1  -3 3846.23  154.13
  13  -1   3 3682.62  156.92
  13   1   3 3856.46  156.71
 -13   1   4  127.22   17.75
 -13  -1  -4  153.75   16.01
 -13   1  -4  103.60   17.00
 -13   1   4  129.03   15.45
 -13  -1  -4  114.62   16.00
  13  -1   4  122.51   14.93
 -13  -1   4  127.99   18.19
 -13   1  -4  177.60   15.18
  13   1   4  109.13   14.18
  13   1   5  228.70   21.55
  13  -1   5  255.82   22.50
 -13  -1   5  183.77   23.29
 -13   1   5  218.29   24.52
 -13   1  -5  241.97   18.91
 -13   1   5  240.76   22.57
 -13  -1   5  260.07   23.29
  13   1   6   10.64    9.50
 -13   1   6   27.68   11.77
 -13   1   6   43.43   14.40
 -13  -1   6   12.71   11.74
 -13  -1   6   12.75   10.79
  13  -1   6   23.12   10.33
 -13  -1   7 1554.00   85.61
  13  -1   7 1529.88   81.35
 -13   1   7 1640.46   83.38
 -13   1   7 1557.10   85.08
  13   1   7 1603.28   81.50
 -13  -1   7 1400.79   80.38
 -13  -1   8   24.28   15.41
 -13   1   8   19.49   12.68
  13  -1   8   26.03   13.53
 -13   1   8   -6.64   13.38
  13   1   8   16.49   12.59
 -13  -1   8    7.43   13.84
 -13   1   9   82.16   23.03
 -13   1   9   83.98   22.81
  13  -1   9   67.56   19.10
 -13  -1   9  109.73   25.51
  13   1   9   50.02   19.57
 -13  -2   0    8.42    6.68
 -13   2   0   -0.45    5.92
 -13   2   0    2.06    4.03
 -13  -2   0   -4.34    5.07
  13   2   1  107.14    7.61
 -13  -2  -1  103.79   12.82
  13  -2   1  117.78    9.65
 -13   2  -1  106.60   14.63
 -13   2   1  112.66    9.50
 -13  -2   1   86.50   13.10
 -13  -2   1  149.83   15.23
  13  -2   1  109.49    9.79
 -13   2  -1  120.96   11.21
 -13  -2  -1  122.65   13.61
 -13   2   1  118.77   14.80
 -13  -2   1  132.29    8.75
 -13  -2   2  140.30   16.50
 -13   2   2  177.56   14.90
 -13   2  -2  170.15   18.12
  13  -2   2  143.54   12.82
  13   2   2  193.54   12.34
 -13  -2  -2  168.73   15.88
 -13  -2   2  166.61   12.19
 -13   2   2  142.35   16.96
 -13   2  -2  155.49   12.56
 -13  -2  -2  175.00   16.00
 -13  -2   3  120.80   12.44
 -13  -2  -3   81.98   12.01
  13  -2   3  112.98   12.49
 -13   2   3   97.97   14.70
 -13   2  -3  112.35   10.92
 -13  -2  -3  118.17   14.41
  13   2   3  107.04   11.74
 -13   2  -3  111.87   15.82
 -13  -2   3   75.34   13.92
 -13  -2  -4 1137.13   55.67
 -13   2   4 1053.75   55.29
 -13   2  -4 1157.74   51.32
  13  -2   4 1086.14   55.36
 -13  -2  -4 1103.50   56.54
 -13   2   4 1140.79   59.82
  13   2   4 1068.75   54.37
 -13  -2   4 1141.16   60.89
  13  -2   5  148.01   18.41
 -13  -2   5  139.51   20.70
 -13  -2  -5  179.14   19.58
 -13   2   5   97.02   16.98
 -13   2   5  161.19   21.31
 -13  -2   5  173.13   19.48
  13   2   5  177.13   18.64
 -13   2  -5  192.59   15.16
 -13  -2   6 1729.51   82.25
 -13   2   6 1640.06   84.34
 -13  -2   6 1683.34   87.09
  13   2   6 1552.80   79.65
  13  -2   6 1481.37   79.96
 -13   2   6 1614.31   81.74
 -13  -2   7   -9.76   10.18
  13  -2   7   -3.42    9.85
 -13   2   7    1.64   11.21
 -13  -2   7    6.85   13.01
 -13   2   7   10.43   12.17
  13   2   7  -29.31    7.73
  13  -2   8  445.26   40.47
 -13   2   8  441.11   41.31
 -13  -2   8  510.66   45.53
  13   2   8  421.44   39.39
 -13  -2   8  495.89   42.22
 -13   2   8  413.06   40.80
 -13  -2   9   44.36   20.66
  13  -2   9   69.71   20.30
  13   2   9   19.69   15.17
 -13   2   9   53.81   19.37
 -13   2   9   41.78   19.26
 -13   3   0   -4.58    5.50
 -13  -3   0    3.55    6.02
 -13  -3   0    0.35    5.62
  13   3   0   -0.37    2.69
 -13   3   0    1.55    5.03
 -13  -3   1   21.49    8.34
 -13   3   1   21.44    6.37
  13  -3   1   27.88    6.45
 -13   3  -1   20.71    5.43
 -13   3   1   25.99    8.74
 -13  -3   1   33.23    5.59
  13  -3   1   36.19    6.75
 -13  -3   1   17.86    7.89
 -13   3  -1   14.43    8.37
 -13  -3   1   26.86    5.11
  13   3   1   16.42    4.00
 -13  -3  -1   18.40    7.50
  13   3   2   42.03    6.91
 -13   3   2   52.81   11.22
 -13   3   2   49.40    8.75
 -13  -3   2   70.76    8.64
 -13   3  -2   50.90    7.19
 -13   3  -2   57.08   12.47
 -13  -3   2   42.84   10.23
 -13  -3  -2   69.49   10.74
 -13  -3   2   41.30   10.04
 -13  -3  -2   76.66   12.27
  13  -3   2   66.77    9.86
 -13   3  -3 1821.52   77.32
 -13  -3  -3 1773.43   83.67
 -13  -3  -3 1923.06   84.84
 -13  -3   3 1839.72   81.74
 -13  -3   3 1867.32   88.38
  13   3   3 1779.74   80.95
  13  -3   3 1923.61   83.56
 -13   3   3 1914.49   88.26
 -13   3  -3 1904.90   89.37
  13  -3   4   10.13    6.81
 -13   3   4   15.64    8.60
 -13   3   4    6.53    7.14
 -13  -3   4    1.13    3.64
 -13  -3   4    4.77    8.95
 -13   3  -4    7.12    4.42
  13   3   4    5.96    6.49
 -13  -3  -4   -1.44    6.17
 -13  -3  -4    7.03    6.38
 -13   3   5   95.01   17.38
 -13  -3   5   81.98   16.77
 -13  -3  -5   93.49   15.17
  13   3   5   88.93   14.57
 -13   3   5  106.29   17.15
  13  -3   5  111.82   17.00
 -13   3  -5  108.77   11.80
 -13  -3   5  103.50   16.17
 -13  -3   6   56.19   15.56
  13   3   6   63.69   14.89
 -13  -3   6   62.51   17.09
  13  -3   6   72.51   16.41
 -13   3   6   76.13   16.66
 -13   3   6   94.12   17.91
  13  -3   7 1853.85   96.06
  13   3   7 1819.57   94.48
 -13   3   7 1944.40   98.66
 -13  -3   7 1825.62   95.59
 -13   3   7 2027.61   98.60
 -13  -3   7 1933.22  101.92
 -13   3   8   31.87   16.32
  13   3   8   28.77   15.79
  13  -3   8   35.34   16.19
 -13  -3   8   46.39   16.18
 -13  -3   8   35.44   15.98
 -13   3   8   22.50   14.48
 -13   3   9   90.26   21.22
  13   3   9   86.89   22.05
 -13   3   9   78.29   22.15
 -13  -3   9   52.32   19.74
  13  -3   9   82.12   20.89
 -13   4   0   -9.12    4.77
 -13   4   0  -11.82    5.52
  13   4   0    5.62    3.54
 -13  -4   0   -2.86    2.34
 -13  -4   0    1.38    5.95
 -13  -4   1  122.79   14.12
 -13  -4   1  125.99   10.60
 -13   4  -1   93.66   14.69
  13   4   1  113.85    9.73
 -13  -4  -1  114.15   12.68
 -13  -4   1  128.31   10.39
 -13   4   1  110.55   13.37
 -13  -4   1  129.35   15.59
 -13   4   1  124.73   15.90
 -13  -4  -1  116.10   14.64
 -13  -4  -2  233.59   21.50
 -13  -4  -2  262.57   19.17
 -13  -4   2  277.04   23.45
 -13   4  -2  288.70   23.59
 -13  -4   2  270.79   21.93
 -13   4  -2  294.91   15.41
 -13  -4   2  282.21   18.29
  13   4   2  297.25   17.80
  13  -4   2  272.50   19.78
 -13   4   2  241.13   22.64
 -13   4  -3    3.41    3.41
 -13  -4   3    6.58    7.80
  13  -4   3    4.16    5.94
 -13  -4  -3    0.05    5.51
 -13  -4  -3   -2.92    5.78
 -13   4   3   -4.71    6.17
  13   4   3   -4.95    4.59
 -13  -4   3    5.55    5.57
 -13   4   3    2.00    6.10
 -13   4  -3    6.94    7.57
 -13  -4  -4  985.03   51.74
  13   4   4  929.98   48.68
  13  -4   4  959.22   50.74
 -13  -4  -4  963.73   48.75
 -13   4  -4  945.62   42.45
 -13   4   4  887.26   51.61
 -13   4   4  900.53   50.18
 -13  -4   4 1039.78   55.49
 -13   4   5  194.76   22.47
  13   4   5  225.33   21.82
 -13  -4   5  255.48   27.48
 -13  -4  -5  236.13   21.04
  13  -4   5  236.78   23.61
 -13   4   5  192.19   22.71
 -13  -4   5  205.08   22.02
  13   4   6  441.60   32.38
  13  -4   6  395.30   32.34
 -13   4   6  394.84   32.71
 -13   4   6  430.57   33.59
 -13  -4   6  407.29   37.43
 -13  -4  -6  423.30   30.19
 -13  -4   6  411.92   32.40
 -13  -4   7  101.47   21.79
 -13  -4   7  134.19   23.18
  13   4   7  159.41   23.55
 -13   4   7  167.96   24.67
 -13   4   7  153.85   24.82
  13  -4   8  260.30   32.71
 -13   4   8  270.08   32.20
  13   4   8  291.10   33.27
 -13  -4   8  338.56   35.53
 -13   4   8  328.81   36.27
 -13  -4   8  320.62   39.21
 -13   4   9   61.20   21.09
 -13  -4   9   55.92   21.24
 -13   4   9   87.43   22.04
  13   4   9   88.95   22.65
  13  -4   9   63.90   20.26
 -13   5   0    0.33    6.15
  13   5   0    1.20    3.98
 -13  -5   0    8.62    7.33
 -13  -5   0   -1.08    4.86
 -13   5   0   -8.16    4.87
 -13  -5  -1   46.20   10.67
 -13   5   1   57.35   11.91
 -13  -5  -1   42.09    8.43
 -13   5  -1   14.07    5.39
 -13   5  -1   35.62   10.49
 -13  -5   1   50.22   11.53
 -13  -5   1   36.79    9.14
  13   5   1   36.62    6.80
  13  -5   2  147.33   15.43
 -13  -5  -2  165.79   18.18
 -13   5  -2  183.28   19.97
 -13  -5  -2  147.54   13.80
 -13   5   2  111.63   16.08
 -13  -5   2  123.13   17.08
 -13  -5   2  147.02   13.77
  13   5   2  127.00   12.39
  13  -5   2  147.79   15.83
 -13   5   2  141.59   15.38
 -13  -5   2  134.36   16.33
 -13   5  -3 1654.06   86.05
 -13  -5  -3 1871.07   80.19
 -13  -5  -3 1795.72   83.74
 -13   5   3 1733.92   84.43
 -13   5   3 1719.80   81.59
  13   5   3 1792.22   79.72
 -13  -5   3 1742.66   85.19
 -13  -5   3 1739.28   79.94
 -13   5  -3 1801.97   71.16
  13  -5   3 1826.58   83.03
  13   5   4   10.73    6.66
 -13   5   4   22.00    9.43
  13  -5   4    4.26    7.00
 -13  -5   4    7.86    6.97
 -13   5   4   11.70    7.95
 -13  -5  -4   10.19    9.09
 -13  -5  -4    5.34    6.30
 -13  -5   4  -11.40    6.89
 -13   5   5   21.22   10.46
  13  -5   5    9.00    9.38
  13   5   5   21.83    9.67
 -13  -5   5   -0.02    9.61
 -13  -5  -5   27.14    8.98
 -13   5   5    9.83   10.77
 -13  -5   5   48.13   14.03
 -13   5   6   22.53   12.81
 -13  -5   6    4.67   11.65
 -13  -5  -6   15.64    8.63
 -13  -5   6    4.28   10.70
  13  -5   6   22.11   11.71
  13   5   6   13.43    9.92
 -13   5   6    4.20    9.52
 -13  -5   7 1135.74   65.10
  13  -5   7 1097.72   64.96
 -13  -5   7 1071.93   68.76
  13   5   7 1074.19   63.15
 -13   5   7 1026.47   64.42
 -13   5   7 1111.65   64.32
  13  -5   8    3.31   12.97
 -13  -5   8   -8.08   12.34
 -13   5   8   23.93   15.28
  13   5   8   15.93   13.10
 -13   5   8   -1.48   14.63
  13   5   9   75.34   22.15
 -13   5   9   56.58   18.43
  13  -5   9   88.93   23.38
 -13   5   9  143.14   28.66
 -13  -5   9   86.33   24.44
 -13  -6   0   -2.47    5.86
 -13   6   0   -7.44    5.26
 -13  -6   0   -3.24    4.73
 -13   6   0    2.36    7.09
  13   6   0   -0.94    4.07
 -13   6   1  419.11   26.97
 -13  -6   1  413.43   28.29
  13   6  -1  380.68   23.87
  13   6   1  377.15   23.01
 -13  -6  -1  405.57   28.12
 -13  -6  -1  413.56   23.67
 -13   6  -1  347.28   25.77
 -13   6   1  398.75   28.14
 -13   6  -1  385.58   28.74
  13   6   2   50.40    9.28
 -13  -6   2   35.82    8.74
 -13   6   2   42.45   10.94
 -13   6  -2   29.72   10.89
 -13  -6  -2   39.49    7.70
 -13  -6   2   40.81    9.36
 -13   6   2   43.01   11.44
  13  -6   2   40.12   10.44
 -13  -6  -2   39.98   11.04
 -13  -6   2   52.20   12.29
 -13  -6   2   39.00   10.53
  13  -6   2   45.12   10.83
 -13  -6  -3   46.91    8.78
 -13  -6  -3   36.77   11.05
 -13   6   3   55.23   12.22
  13   6   3   41.99    9.90
 -13  -6   3   61.46   11.21
  13  -6   3   45.04   11.52
 -13   6   3   50.06   11.72
 -13   6  -3   31.81   11.72
 -13  -6   3   45.60   11.88
 -13  -6  -4  702.70   42.08
  13  -6   4  591.88   39.63
 -13  -6   4  636.16   42.25
 -13  -6   4  629.11   38.47
  13   6   4  669.26   38.62
 -13  -6  -4  651.12   35.22
 -13   6   4  671.66   41.50
 -13   6   4  659.53   39.86
  13   6   5   30.48   11.02
  13  -6   5    0.81   10.04
 -13  -6  -5    7.60    7.06
 -13  -6   5   26.26   13.27
 -13   6   5   33.12   13.43
 -13  -6   5   29.22   11.96
 -13   6   5   15.33   10.16
  13  -6   6  646.86   43.87
  13   6   6  623.53   41.64
 -13   6   6  586.91   40.29
 -13  -6   6  591.12   41.73
 -13   6   6  551.17   41.98
 -13  -6   6  644.75   46.80
 -13   6   7   -2.22    9.81
 -13   6   7   22.59   15.22
 -13  -6   7   -5.90   13.19
 -13  -6   7   22.39   13.19
  13  -6   7    8.45   12.15
  13   6   7    6.21   11.00
  13  -6   8  270.62   35.14
 -13   6   8  349.57   34.48
 -13  -6   8  324.65   36.71
  13   6   8  320.25   35.44
 -13   6   8  357.73   39.47
 -13   6   9   86.03   24.78
  13  -6   9   69.85   22.91
 -13  -6   9   75.22   23.54
  13   6   9  123.38   24.71
 -13   7   0   18.97    8.79
 -13   7   0    4.28    7.42
 -13  -7   0    0.32    5.39
  13   7   0   -0.02    4.81
 -13  -7   0    1.14    6.65
 -13   7  -1  126.51   16.96
 -13   7  -1  116.76   17.51
 -13  -7  -1  158.88   19.26
 -13  -7  -1  156.92   13.10
  13   7   1  174.56   15.34
 -13   7   1  177.19   18.37
  13   7  -1  157.30   15.54
 -13  -7   1  165.29   18.89
 -13   7   1  159.99   18.60
 -13  -7   1  165.32   16.15
 -13   7  -2    6.96    7.97
 -13  -7   2   -3.45    5.74
  13   7   2    4.56    5.92
  13  -7   2   12.41    7.78
 -13   7   2    9.52    7.84
 -13  -7   2   -3.55    6.94
 -13   7   2    3.69    6.76
 -13  -7   2    9.54    7.24
  13  -7   2    2.51    6.72
 -13  -7   2   11.89    7.24
 -13  -7  -2   15.63    8.08
 -13  -7  -2   -0.84    4.29
  13  -7   3 1093.60   54.63
 -13   7   3 1013.38   54.36
 -13   7   3  964.44   54.92
 -13  -7  -3  948.94   55.32
  13  -7   3 1103.24   57.01
 -13  -7   3  974.22   55.09
 -13   7  -3 1042.71   58.73
  13   7   3 1049.85   52.69
 -13  -7  -3 1040.17   48.42
 -13  -7   3 1013.00   55.95
  13   7   4    5.61    8.24
 -13  -7  -4    4.93    9.10
 -13  -7  -4   10.29    6.16
  13  -7   4    4.75    9.83
 -13   7   4   23.85   12.75
 -13  -7   4   14.84    9.26
 -13  -7   4   16.52   10.71
 -13   7   4   11.78    8.06
 -13   7   5   60.86   13.45
 -13  -7   5   69.14   16.06
  13   7   5   66.34   14.71
  13  -7   5   77.74   17.48
 -13   7   5   41.72   14.99
 -13  -7   5   58.36   15.52
 -13  -7   6   47.51   16.41
 -13  -7   6   37.18   14.65
  13  -7   6   54.85   17.03
  13   7   6   61.10   16.12
 -13   7   6   46.69   14.06
 -13   7   6   56.87   18.33
 -13  -7   7 1188.22   71.14
  13   7   7 1322.84   72.17
  13  -7   7 1227.52   72.51
 -13   7   7 1257.89   69.70
 -13   7   7 1200.85   73.02
 -13  -7   8   26.96   16.71
  13   7   8   -0.23   12.50
  13  -7   8   14.07   15.30
 -13   7   8   -2.74   14.97
 -13   7   9   88.49   24.50
 -13  -7   9   38.03   20.41
  13  -7   9   24.57   18.42
  13   7   9   88.59   21.85
 -13   8   0   -0.57    7.56
 -13   8   0   -8.76    5.78
 -13  -8   0    0.61    6.84
 -13  -8   0    7.19    5.50
  13   8   0    3.70    4.97
 -13   8   1  112.85   17.50
 -13  -8  -1  115.75   18.11
 -13   8  -1  115.07   17.37
 -13  -8   1  155.56   19.45
 -13   8  -1  155.87   19.58
  13   8  -1  147.06   16.10
 -13   8   1  150.73   18.43
  13   8   1  120.59   14.53
 -13  -8   1  120.07   14.45
 -13  -8  -1  151.41   12.34
 -13   8   2   70.64   15.51
 -13  -8   2  102.04   14.81
 -13  -8   2   74.07   14.78
 -13   8   2   78.38   14.35
 -13  -8   2   87.49   13.75
  13   8   2   98.68   13.95
 -13  -8   2   64.73   12.45
 -13  -8  -2   79.43   15.97
 -13  -8  -2  109.10    9.69
  13  -8   2   87.79   15.35
  13  -8   2   92.11   16.21
 -13   8  -2   72.75   14.85
 -13   8  -3  108.83   19.19
  13   8   3  107.46   15.30
 -13  -8  -3   69.77   15.58
  13  -8   3   82.04   16.59
  13  -8   3  105.43   18.20
 -13  -8   3  107.15   17.83
 -13   8   3  132.78   19.80
 -13   8   3  112.08   15.71
 -13  -8   3  120.97   18.03
 -13   8  -4  684.34   46.00
  13  -8   4  654.74   44.41
  13   8   4  667.89   41.79
 -13  -8  -4  648.67   43.83
 -13   8   4  729.58   45.39
 -13   8   4  724.36   41.67
 -13  -8   4  701.11   44.96
 -13  -8   4  653.35   42.36
 -13  -8  -5   96.27   19.44
 -13   8   5   88.42   19.79
  13   8   5   55.82   15.26
 -13   8   5   89.47   15.44
  13  -8   5   78.38   18.19
 -13  -8   5   62.42   17.40
 -13  -8   5   97.28   19.07
  13  -8   6  472.60   40.09
  13   8   6  547.87   39.46
 -13  -8   6  550.83   43.45
 -13   8   6  532.01   43.17
 -13   8   6  520.36   36.57
 -13  -8   6  524.23   40.38
  13  -8   7   30.64   16.93
 -13  -8   7   12.33   12.96
 -13   8   7   39.21   16.60
  13   8   7   12.97   12.35
  13   8   8  223.32   32.14
 -13  -8   8  227.96   33.37
  13  -8   8  223.42   33.69
 -13   8   8  199.24   33.35
 -13  -8   9   24.44   19.97
 -13   8   9   19.89   19.92
  13  -8   9   11.71   18.92
  13   8   9   22.53   17.78
 -13   9   0   -2.96    6.65
 -13   9   0    8.96    9.41
 -13  -9   0    1.79    5.01
  13   9   0    1.57    5.37
 -13  -9   0    0.42    8.24
  13   9   1    4.36    6.61
 -13  -9   1   10.71    6.74
 -13  -9  -1    7.21    4.81
 -13  -9   1   21.38    8.96
 -13   9   1   12.97    8.46
 -13  -9  -1    8.82    9.32
  13   9  -1   16.05    7.69
 -13   9   1   10.84    9.60
 -13   9  -1   21.63   10.89
 -13   9  -1   -4.51    6.85
 -13  -9   2   23.75    9.14
 -13   9   2   49.40   14.30
 -13   9  -2   61.02   14.98
  13   9   2   67.05   12.61
 -13  -9  -2   48.43   13.52
 -13   9  -2   54.59   14.04
 -13   9   2   58.74   12.75
 -13  -9   2   59.43   14.33
 -13  -9  -3 1351.14   74.62
  13   9   3 1506.93   72.73
 -13   9  -3 1539.00   78.92
 -13   9   3 1339.63   75.58
 -13  -9   3 1474.74   74.77
 -13  -9   3 1521.68   74.38
  13  -9   3 1554.20   74.78
 -13  -9   3 1481.82   70.89
 -13   9   3 1477.39   73.08
  13  -9   3 1413.26   76.64
 -13  -9   3 1452.28   74.74
 -13  -9   4    2.94   10.05
 -13   9   4   27.25    9.08
 -13  -9  -4   -5.03    8.53
 -13  -9   4   14.60   10.55
  13  -9   4   21.41   12.42
 -13   9   4   19.54   15.68
  13  -9   4   14.50   11.76
  13   9   4    1.02    9.77
 -13   9  -4    5.53   11.33
  13  -9   5   23.55   13.53
 -13  -9   5   59.01   16.17
 -13   9   5   56.94   18.73
 -13  -9  -5   40.86   14.00
 -13   9   5   91.26   15.08
 -13  -9   5   28.60   14.65
  13   9   5   37.75   14.45
  13  -9   6    0.60   12.07
 -13  -9   6    3.64   12.79
  13   9   6    9.65   11.16
 -13   9   6    1.88   13.68
 -13   9   7  807.06   57.60
  13  -9   7  714.09   54.20
  13   9   7  752.28   52.73
 -13  -9   7  677.41   51.84
  13  -9   8   27.15   18.98
  13   9   8   24.61   16.12
 -13  -9   8   37.55   20.61
 -13   9   8   19.30   18.84
 -13 -10   0   -2.11    8.29
 -13  10   0    3.69    9.64
 -13  10   0   19.22   10.17
 -13 -10   0    6.20    5.46
  13  10   0    8.66    7.29
 -13  10   1  198.22   21.92
  13  10   1  202.10   20.89
 -13 -10   1  248.03   19.65
  13  10  -1  183.60   21.04
 -13  10  -1  248.29   26.78
 -13  10   1  259.28   27.06
 -13 -10   1  234.94   25.04
 -13  10  -1  226.59   24.32
 -13 -10  -1  237.54   26.10
 -13 -10  -2  196.84   24.50
 -13  10  -2  174.53   23.04
 -13  10   2  167.78   24.14
 -13 -10   2  174.50   22.18
  13  10  -2  148.99   19.76
 -13 -10   2  189.32   19.66
 -13  10  -2  158.30   23.59
  13  10   2  237.34   21.97
 -13  10   2  172.76   20.05
 -13 -10  -3   15.50   11.29
  13  10   3    8.06    9.39
 -13 -10   3    4.12    9.80
 -13 -10   3    4.17    9.67
 -13  10   3  -11.30   10.47
 -13 -10   3   -1.86    8.19
 -13  10  -3   11.11   10.57
  13 -10   3   -9.87    9.48
 -13  10   3   16.26    8.62
 -13 -10   3   18.87   10.96
  13 -10   3   -2.74    9.79
 -13 -10  -4  617.70   43.89
 -13  10  -4  612.78   44.39
  13  10   4  672.03   43.21
  13 -10   4  639.41   45.83
 -13 -10   4  626.71   41.44
  13 -10   4  639.83   43.95
 -13  10   4  638.66   38.99
 -13 -10   4  598.47   42.72
 -13 -10   4  656.20   43.66
 -13  10   4  654.32   46.32
  13 -10   5   75.42   19.01
 -13 -10   5   79.82   18.31
 -13 -10  -5   79.27   17.88
 -13  10   5   87.02   21.72
  13  10   5   60.91   16.28
  13 -10   5   56.49   18.08
 -13 -10  -6  356.49   37.85
  13 -10   6  389.45   39.97
 -13 -10   6  423.06   39.22
  13  10   6  452.41   39.78
 -13  10   6  513.34   44.51
  13 -10   7   29.21   17.24
  13  10   7   68.07   19.64
 -13 -10   7   35.35   18.70
 -13  10   7   29.29   20.11
  13  10   8  136.39   27.88
  13 -10   8   85.21   24.57
 -13 -10   8   70.49   24.96
 -13  10   8   58.42   23.61
 -13  11   0    4.36   10.53
 -13 -11   0   -3.47    9.50
 -13  11   0   13.12    9.45
  13  11   0   -1.51    6.90
 -13 -11   1   88.76   12.87
  13  11  -1   70.89   15.13
 -13  11   1   69.60   14.63
 -13  11  -1   92.91   18.38
 -13  11   1  120.99   21.06
 -13 -11   1   59.89   15.59
 -13  11  -1   61.45   17.54
  13  11   1   62.13   13.76
 -13 -11  -1   83.67   18.33
 -13  11   2   22.78   10.16
 -13  11   2   51.48   16.42
  13  11   2   40.60   12.94
 -13  11  -2   33.87   13.10
 -13 -11   2   55.08   14.83
  13  11  -2   35.42   12.75
 -13  11  -2   42.96   15.23
 -13 -11  -2   38.72   14.83
 -13 -11   2   51.45   11.84
 -13 -11  -3  885.46   54.54
  13  11   3  904.27   51.89
 -13  11  -3  829.70   54.21
 -13  11   3  891.16   49.52
 -13 -11   3  839.26   52.88
 -13 -11   3  968.88   54.21
 -13  11   3  935.59   56.67
 -13 -11   3  786.20   49.98
  13  11   4   37.67   13.37
 -13 -11   4   37.62   15.82
 -13 -11   4   18.04   12.98
 -13  11   4   50.30   18.21
 -13  11  -4   14.99   12.09
  13 -11   4   38.15   16.06
 -13 -11  -4   20.64   13.17
  13 -11   4   25.10   13.76
  13 -11   5   34.49   17.12
 -13 -11   5   41.17   16.19
  13  11   5   62.52   17.37
  13 -11   5   61.51   18.40
 -13 -11  -5   54.50   16.30
 -13  11   5   47.52   19.12
 -13 -11   5   64.45   16.68
  13 -11   6   11.10   15.39
  13 -11   6   48.69   18.10
 -13 -11   6   27.30   16.40
 -13  11   6   31.31   18.94
  13  11   6   57.86   18.98
 -13 -11  -6   42.52   16.12
  13  11   7  850.58   57.21
 -13 -11   7  736.78   56.05
 -13  11   7  755.75   59.25
  13 -11   7  838.57   60.61
 -13 -11  -7  742.62   55.40
  13  11   8   19.15   17.73
  13 -11   8   -3.31   18.24
 -13 -11  -8    6.93   13.48
 -13 -11   8   -4.89   17.75
 -13  11   8  -24.43   14.13
 -13  12   0   15.90    9.37
 -13 -12   0   -7.13    8.86
  13  12   0  -10.62    6.95
 -13  12   0   -5.90   10.50
 -13  12  -1   27.43   13.93
  13  12   1   11.19    9.79
 -13  12  -1   12.64   11.37
 -13 -12  -1   29.65   13.20
 -13 -12   1  -12.52    9.44
 -13  12   1    9.96    8.78
 -13  12   1   -1.54   11.65
  13  12  -1   -2.02    8.55
 -13  12  -2   13.39   13.26
 -13  12   2    0.32   12.35
 -13  12  -2   31.36   13.21
  13  12  -2   18.87   11.62
 -13 -12   2   -6.47   10.11
  13  12   2    9.04   10.18
 -13 -12  -2   14.51   13.27
  13  12   3  154.27   22.38
 -13  12  -3  158.44   24.72
 -13 -12  -3  116.43   22.40
  13  12  -3  159.53   23.63
 -13  12  -3  129.98   24.20
 -13  12   3  169.90   26.39
 -13 -12   4  305.50   32.80
 -13  12   4  295.99   35.38
 -13 -12  -4  378.61   37.15
  13 -12   4  351.83   36.46
 -13 -12   4  325.49   32.78
  13  12   4  300.67   31.64
 -13  12  -4  296.53   33.28
  13 -12   4  320.28   35.70
 -13 -12   5  106.17   22.46
 -13  12   5  111.58   26.61
 -13 -12   5   83.83   20.53
 -13 -12  -5   74.84   19.70
  13 -12   5  107.95   23.88
 -13  12  -5  105.62   22.77
  13 -12   5  116.43   24.33
  13  12   5  120.15   23.08
  13  12   6  550.46   44.52
 -13 -12  -6  404.92   42.62
 -13  12   6  557.90   50.71
 -13 -12   6  503.70   45.22
  13 -12   6  506.24   48.14
 -13 -12   6  552.29   43.33
  13 -12   6  540.53   47.71
  13 -12   7  -14.12   13.63
  13 -12   7    3.52   14.88
 -13  12   7   13.78   19.37
  13  12   7   31.41   16.09
 -13 -12  -7  -15.75   12.50
 -13 -12   7   -5.94   15.59
 -13 -13   0    4.20   11.46
 -13  13   0    9.33   11.54
  13  13   0    7.52   10.90
 -13  13   0  -13.03    9.78
 -13  13  -1   11.17   11.32
 -13  13   1    6.24   13.65
  13  13   1    9.49   10.97
 -13  13  -1   10.69   13.01
 -13 -13  -1    1.50   10.69
 -13 -13   1    7.86   12.57
  13  13  -1   32.85   13.08
 -13  13  -2   -0.29    9.74
 -13 -13  -2   15.53   14.14
 -13 -13   2    7.78   10.59
  13  13  -2   11.18   10.11
  13  13   2   28.31   12.74
 -13  13   2   35.48   16.82
 -13  13  -2   -1.31   12.28
 -13  13  -3  635.66   48.86
  13  13  -3  671.93   46.65
 -13  13   3  689.43   50.12
 -13 -13  -3  687.58   48.24
  13  13   3  621.09   44.65
 -13  13  -3  596.71   46.04
 -13 -13   4   15.29   14.29
 -13 -13   4   13.34   14.18
 -13 -13  -4   -8.78   11.41
 -13  13  -4    0.55   11.53
  13  13   4   38.75   14.90
 -13  13   4   -0.40   14.58
 -13 -13   5   33.34   15.21
  13 -13   5   41.60   18.16
 -13  13   5   15.61   17.30
  13 -13   5   30.60   16.74
 -13  13  -5   45.54   17.74
 -13 -13  -5   23.48   15.88
 -13 -13   5   14.98   16.20
  13  13   5   12.51   14.79
  13 -13   6   23.18   16.91
 -13  13   6    8.06   19.64
  13  13   6   42.15   18.19
 -13 -13   6    8.53   17.18
 -13  13  -6   10.83   13.83
  13 -13   6   -1.59   15.18
 -13 -13  -6   58.91   19.87
 -13 -13   6   23.32   18.24
  13 -13   7  604.96   55.38
 -13 -13   7  617.20   55.61
  13  13   7  714.65   53.85
 -13 -13   7  716.96   54.37
 -13 -13  -7  516.15   50.56
 -13  13   7  607.56   58.11
  13 -13   7  665.23   58.90
 -13  14   0    8.38   14.08
 -13 -14   0    9.10   11.70
  13  14   0    9.82   12.26
 -13  14  -1  122.43   24.72
 -13 -14  -1   69.44   19.31
  13  14  -1   72.23   18.30
 -13  14   1   76.67   21.25
  13  14   1  116.10   20.74
 -13 -14   1   94.38   20.65
 -13  14  -1   50.59   16.02
 -13 -14  -2   80.07   21.40
 -13  14  -2   74.98   18.51
 -13  14  -2   66.65   21.38
 -13  14   2   97.16   23.38
 -13 -14   2   84.77   17.93
  13  14  -2   57.98   17.82
  13  14   2   65.49   16.84
 -13 -14  -3  -24.16   10.27
 -13  14   3    4.47   14.41
 -13 -14   3    4.47   12.25
  13  14   3  -15.31   10.20
 -13  14  -3    8.19   14.89
 -13  14  -3   12.98   12.95
  13  14  -3    1.27   12.18
  13  14  -4  309.00   34.55
  13  14   4  358.10   35.95
 -13  14  -4  348.39   39.55
 -13  14  -4  302.75   34.44
 -13 -14  -4  278.07   35.19
 -13  14   4  354.58   41.35
 -13 -14   5   75.03   22.38
  13 -14   5   78.63   24.34
 -13  14   5   64.94   23.31
 -13 -14   5   61.95   22.51
  13 -14   5   74.10   22.91
  13  14   5   93.07   21.86
 -13  14  -5   29.42   17.45
 -13 -14  -5   79.98   21.72
  13  14   6  201.37   32.23
 -13 -14   6  147.09   31.28
  13 -14   6  180.15   33.51
 -13  14   6  192.75   36.24
  13 -14   6  170.92   31.22
 -13 -14   6  180.61   30.40
 -13  14  -6  171.54   30.04
 -13 -14  -6   97.14   24.98
 -13 -15   0  -12.69   12.26
  13  15   0   -0.60   11.83
 -13  15   0   11.10   15.86
 -13  15   1    9.65   15.03
 -13 -15   1   -2.93   11.38
 -13 -15  -1    8.99   12.58
  13  15  -1    6.21   12.14
  13  15   1    5.51   12.21
 -13  15  -1    5.37   14.70
  13  15  -2    6.44   12.35
 -13 -15   2   -0.22    9.55
 -13  15   2   -5.04   14.35
 -13  15  -2    5.98   14.14
 -13 -15  -2   -9.96   12.66
 -13  15  -2    1.03   15.04
  13  15   2   13.03   11.16
  13  15  -3  539.58   43.83
 -13  15  -3  609.73   45.60
 -13 -15  -3  491.99   45.99
  13  15   3  504.79   41.73
 -13  15   3  543.34   49.65
 -13  15  -3  513.23   48.56
 -13  15  -4   -2.33   13.61
  13  15   4   15.82   12.43
 -13  15   4    6.49   15.63
 -13 -15  -4    2.95   12.90
  13  15  -4    5.09   12.40
 -13  15  -4    1.56   15.45
 -13  15  -5   11.90   15.00
 -13 -15  -5    2.97   14.71
 -13  15  -5    9.36   17.88
  13  15   5   10.83   14.46
 -13  15   5    4.37   21.54
  13 -15   6    3.19   19.11
  13 -15   6   15.01   19.02
 -13 -15   6  -10.26   14.62
 -13  15  -6   56.36   20.54
 -13 -15   6  -18.96   15.26
  13  15   6   -5.18   15.70
 -13  15   6    8.26   20.31
 -13 -15  -6    2.34   14.64
  13  16   0   10.07   13.64
 -13 -16   0    1.89   13.28
 -13  16   0   12.69   17.31
 -13 -16   1   10.79   13.64
 -13  16   1   32.96   18.29
 -13 -16  -1    8.21   14.59
  13  16  -1   45.27   16.72
  13  16   1   57.28   17.62
 -13  16  -1   38.64   21.21
 -13 -16  -2   45.09   18.35
 -13  16   2   53.31   21.03
  13  16   2   28.88   13.60
  13  16  -2   56.05   19.16
 -13  16  -2   59.76   21.30
 -13  16   3   86.48   23.34
  13  16   3   76.25   20.59
 -13  16  -3   52.02   19.28
  13  16  -3   47.62   18.00
 -13  16  -3   88.97   24.72
 -13 -16  -3   53.20   20.59
 -13  16   4  181.18   34.67
  13  16   4  172.41   28.53
 -13  16  -4  128.64   25.65
  13  16  -4  115.62   24.79
 -13 -16  -4  130.54   27.40
 -13  16  -4  152.52   30.77
  13  16  -5   39.44   18.71
 -13 -16  -5   39.21   19.28
 -13  16  -5   36.89   17.92
 -13  16  -5   67.75   23.25
 -13  16   5   45.67   23.21
  13  16   5   41.46   19.47
  13  17   0   20.92   15.80
 -13 -17   0    2.11   13.56
 -13  17   0    3.10   14.78
 -13  17  -1    8.09   14.71
 -13 -17   1   34.19   16.30
 -13  17   1   17.31   17.63
  13  17  -1    9.14   15.19
  13  17   1   11.47   14.25
 -13 -17  -1   21.52   16.17
 -13  17  -2   25.13   19.39
 -13 -17  -2   -6.36   15.43
  13  17   2  -10.44   12.14
  13  17  -2   -7.32   14.13
 -13  17   2   -4.76   16.75
  13  17   3  353.19   38.83
 -13 -17  -3  312.57   39.04
 -13  17   3  334.21   43.66
 -13  17  -3  363.61   44.72
  13  17  -3  347.96   39.95
 -13  17  -4   50.06   22.70
 -13  17   4   56.03   24.05
  13  17  -4   42.50   19.63
 -13 -17  -4    4.36   15.88
  13  17   4   32.39   19.15
  13  18   0   10.10   14.37
 -13  18   0   -6.73   16.76
 -13 -18   0   -5.83   14.63
 -13 -18  -1   54.24   20.41
 -13  18   1   54.91   22.75
 -13  18  -1   57.96   23.33
  13  18   1   37.39   18.40
  13  18  -1   68.33   21.27
 -13  18  -2  121.42   28.00
  13  18  -2   90.06   23.12
 -13 -18  -2   66.32   21.62
  13  18   2  128.80   25.11
 -13  18   2   98.73   27.06
 -13 -18  -3    1.35   15.97
  13  18   3    8.68   14.59
  13  18  -3    6.65   16.33
 -13  18  -3   11.02   17.03
 -13  18   3   24.29   19.10
 -13  19   0   27.31   19.82
  13  19   0    3.96   16.68
 -13  19   1   -9.48   16.64
 -13 -19  -1   15.13   17.95
  13  19   1   -1.63   15.56
  13  19  -1  -15.70   15.01
 -13  19  -1   12.64   18.09
 -14   0   0  713.52   39.51
 -14   0   0  693.75   36.81
[truncated: 483,154 more chars]
